# Supplementary material for: Synergistic zinc catalyst mediated oxa-Michael kinetic resolution reaction
Source: Royal Society of Chemistry journal article supplement (doi:10.1039/d1qo00402f), 2021-01-01

*Supporting Information*

**Synergistic Zinc Catalyst Mediated Oxa-Michael Kinetic Resolution  
Reaction**

Tianyu Peng, Haiyong Zhu, Yingfan Xu, Dan Li, Yuan Wang, Linqing Wang\*, Xin Liu\*, Dongxu Yang, and Rui Wang\*

*Key Laboratory of Preclinical Study for New Drugs of Gansu Province, Institute of Drug, Design & Synthesis,  
School of Basic Medical Sciences, Lanzhou University, Lanzhou, 730000, China.*

*E-mail: lqwang@lzu.edu.cn; liuxin@lzu.edu.cn; wangrui@lzu.edu.cn.*

**CONTENTS:**

|                                                                                                                |           |
|----------------------------------------------------------------------------------------------------------------|-----------|
| <b>General Remarks .....</b>                                                                                   | <b>2</b>  |
| <b>Screening Tables .....</b>                                                                                  | <b>3</b>  |
| <b>General Synthesis Methods of the Initial Materials.....</b>                                                 | <b>5</b>  |
| <b>Synthesis Procedure of L10 .....</b>                                                                        | <b>9</b>  |
| <b>Experimental Procedures for the Oxa-Michael KR Reaction .....</b>                                           | <b>11</b> |
| <b>Nonlinear effects studies .....</b>                                                                         | <b>33</b> |
| <b>Control experiments .....</b>                                                                               | <b>34</b> |
| <b>X-Ray Analysis of Product 2a .....</b>                                                                      | <b>38</b> |
| <b>Gram Scale Trial of the Oxa-Michael KR Reaction and Transformation of the Resolution<br/>Products .....</b> | <b>39</b> |
| <b>HPLC Results .....</b>                                                                                      | <b>43</b> |
| <b>NMR Spectra.....</b>                                                                                        | <b>92</b> |

## General Remarks

All reactions were performed under an argon atmosphere and solvents were dried according to established procedures.  $^1\text{H}$  NMR (300 MHz), and  $^{13}\text{C}$  NMR (75 MHz or 150 MHz) spectra were obtained in  $\text{CDCl}_3$  or DMSO. The chemical shifts are reported in ppm relative to internal standard TMS ( $^1\text{H}$  NMR), to residual signals of the solvents ( $\text{CHCl}_3$ , 7.26 ppm for  $^1\text{H}$  NMR and 77.0 ppm for  $^{13}\text{C}$  NMR). IR spectra were recorded on a FT-IR spectrometer with KBr pellet and only major peaks were reported in  $\text{cm}^{-1}$ . High resolution massspectra (HRMS) were obtained by the ESI ionization sources. The er values determination were carried out using chiral HPLC on Waters with a 2996UV-detector.  $\text{Et}_2\text{Zn}$  (1.0 M in toluene) is commercially available at Energy-Chemical.

## Screening Tables

### a) Ligand Screening Table

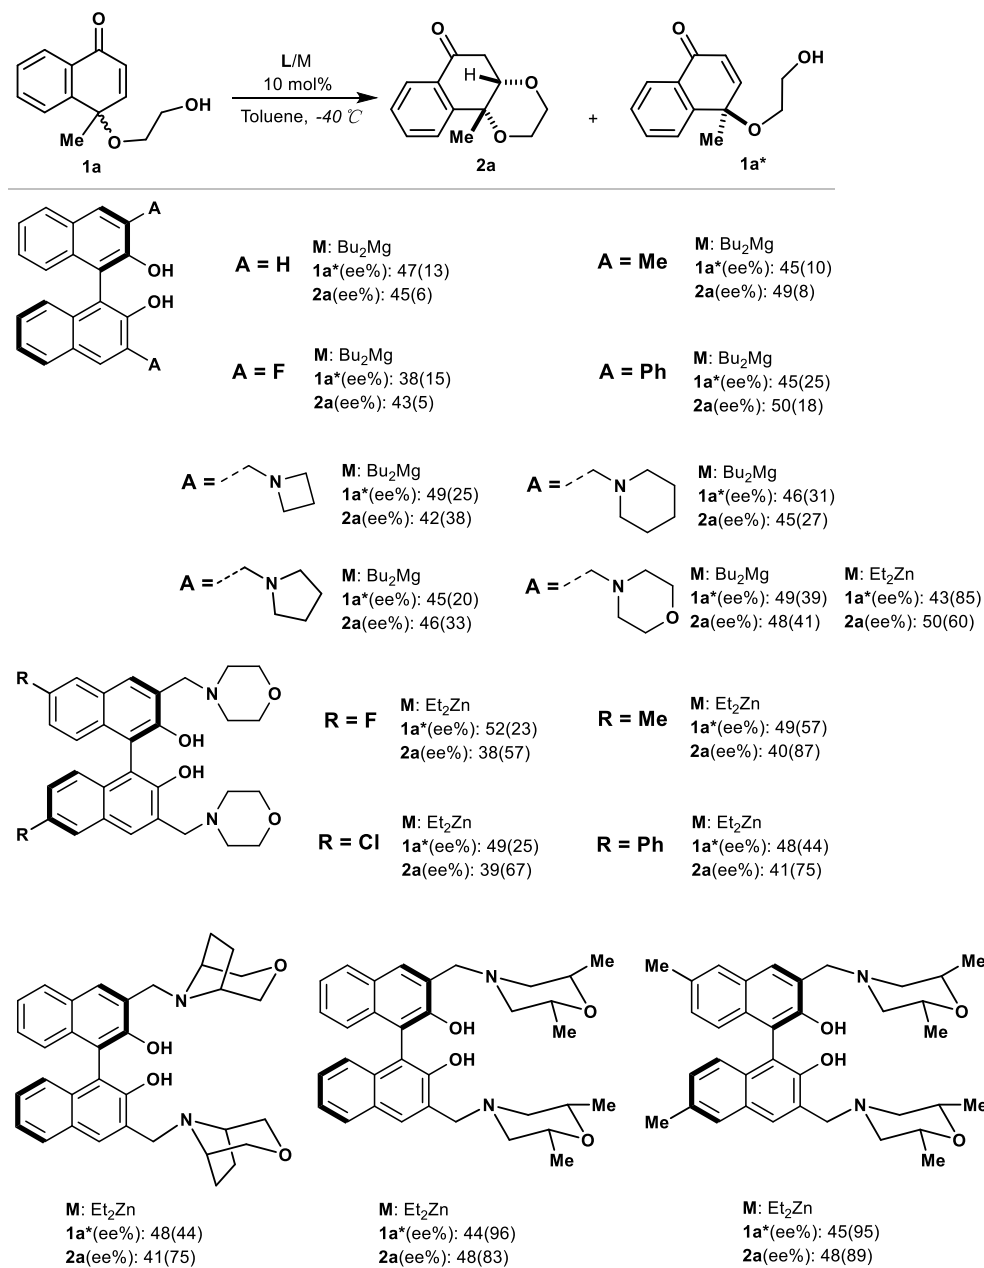

Reactions were carried out with **1a** (0.1 mmol) with Et<sub>2</sub>Zn (10 mol%) or Bu<sub>2</sub>Mg (10 mol%) and ligands (10 mol%), in toluene at -40 °C for appropriate time, isolated yields were reported and ee values were analyzed by chiral HPLC.

### b) Solvent Screening Table

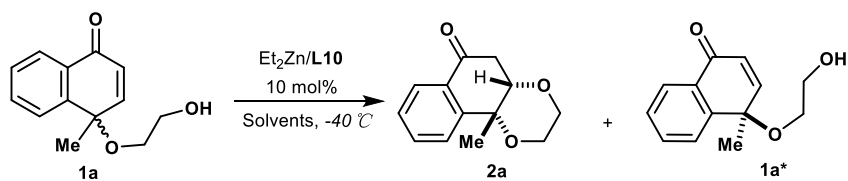

| entry <sup>a</sup> | L   | M                  | solvents          | 1* (ee%) | 2 (ee%) | s <sup>b</sup> |
|--------------------|-----|--------------------|-------------------|----------|---------|----------------|
| 1                  | L10 | Et <sub>2</sub> Zn | THF               | 43 (63)  | 48 (59) | 7.2            |
| 2                  | L10 | Et <sub>2</sub> Zn | DCM               | 69 (15)  | 31 (45) | 3.0            |
| 3                  | L10 | Et <sub>2</sub> Zn | PhCl              | 50 (53)  | 43 (81) | 16.1           |
| 4                  | L10 | Et <sub>2</sub> Zn | Et <sub>2</sub> O | 78 (0)   | 21 (5)  | 0              |
| 5                  | L10 | Et <sub>2</sub> Zn | toluene           | 43 (95)  | 48 (89) | 63.7           |
| 6                  | L10 | Et <sub>2</sub> Zn | <i>o</i> -xylene  | 45 (89)  | 43 (85) | 36.6           |
| 7                  | L10 | Et <sub>2</sub> Zn | <i>m</i> -xylene  | 48 (86)  | 47 (86) | 36.6           |
| 8                  | L10 | Et <sub>2</sub> Zn | <i>p</i> -xylene  | 47 (85)  | 48 (78) | 21.6           |

DCM, dichloromethane; THF, tetrahydrofuran.

<sup>a</sup>Reactions were carried out with **1a** (0.1 mmol) with Et<sub>2</sub>Zn (10 mol%) and **L10** (10 mol%), in different solvents at -40 °C for appropriate time, isolated yields were reported and ee values were analyzed by chiral HPLC. <sup>b</sup>s = ln[(1 - C)(1 - ee**1a**\*)]/ln[(1 - C)(1 + ee**1a**\*)], C is monitored by HPLC analysis and calculated according to C = ee**1a**\*/(ee**1a**\* + ee**2a**).

### c) Detail Condition Screening Table

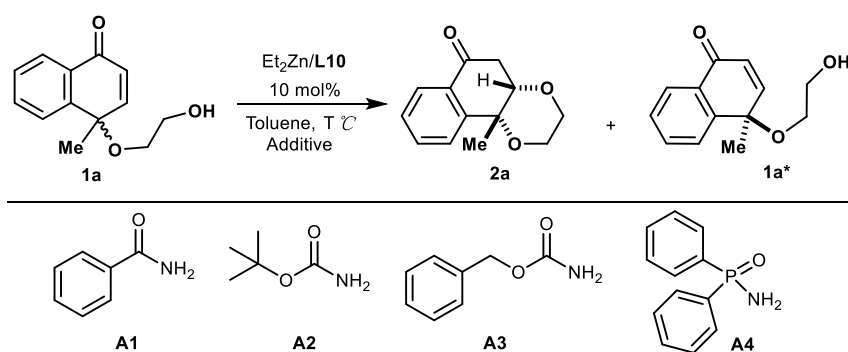

| entry <sup>a</sup> | T (°C) | additive | 1* (ee%) | 2 (ee%) | s <sup>b</sup> |
|--------------------|--------|----------|----------|---------|----------------|
| 1                  | -78    | -        | -        | -       | 0              |
| 2                  | -40    | -        | 45 (92)  | 49 (88) | 51.2           |



|   |     |    |         |         |      |
|---|-----|----|---------|---------|------|
| 3 | -20 | -  | 47 (99) | 50 (86) | 68.9 |
| 4 | RT  | -  | 19 (99) | 82 (5)  | 3.3  |
| 5 | -20 | A1 | 44 (79) | 50 (40) | 5.2  |
| 6 | -20 | A2 | 47 (99) | 48 (90) | 99.4 |
| 7 | -20 | A3 | 42 (92) | 47 (82) | 32.8 |
| 8 | -20 | A4 | 46 (85) | 50 (64) | 11.9 |

<sup>a</sup>Reactions were carried out with **1a** (0.1 mmol) with Et<sub>2</sub>Zn (10 mol%) and **L10** (10 mol%), in toluene at different temperature or added different additives for appropriate time, isolated yields were reported and ee values were analyzed by chiral HPLC. <sup>b</sup> $s = \ln[(1 - C)(1 - ee1a^*)]/\ln[(1 - C)(1 + ee1a^*)]$ , C is monitored by HPLC analysis and calculated according to  $C = ee1a^*/(ee1a^* + ee2a)$ .

## General Synthesis Methods of the Initial Materials

### General Procedure A:

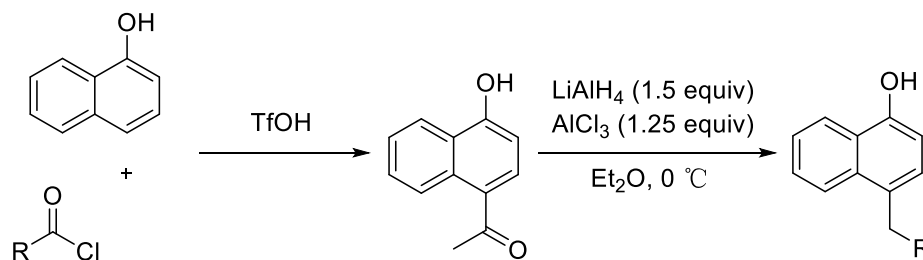

For the synthetic routes to:

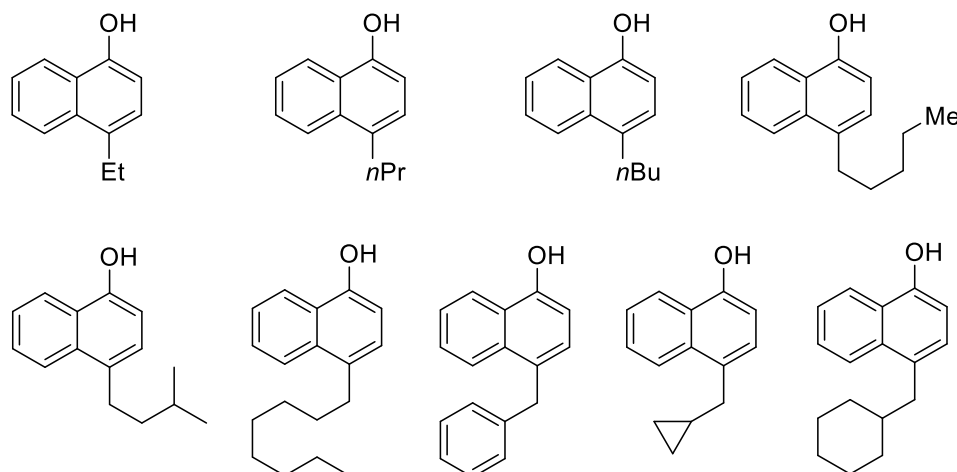

Methods: To a solution of 1-naphthol (1.0 equiv) in TfOH (10 mL) at 0°C was added chloride (1.0 equiv). The mixture was stirred at 0 °C for 0.5-1.0 hours. After completed, the mixture was quenched with H<sub>2</sub>O, extracted with CH<sub>2</sub>Cl<sub>2</sub>, then the separated organic

phase was washed with saturated  $\text{NaHCO}_3$  solution, dried with  $\text{Na}_2\text{SO}_4$ , and purified via flash column chromatography to give pure products.

#### General Procedure B:

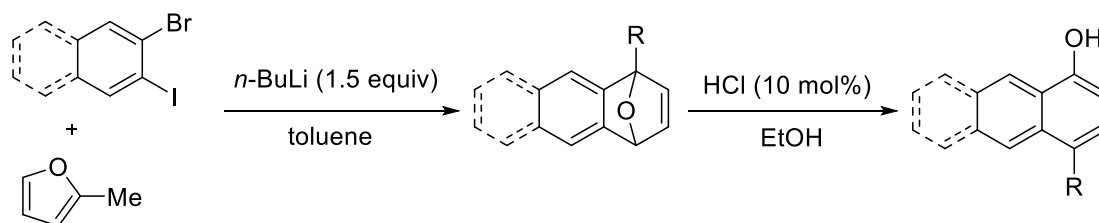

For the synthetic routes to:

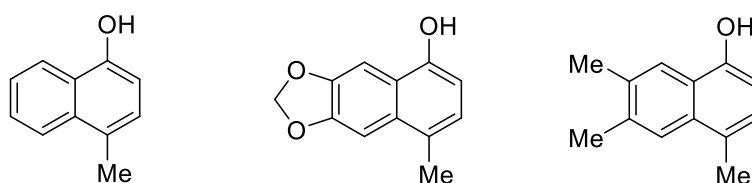

Methods: To a solution of halide (1.0 equiv) and 2-methylfuran (2.0 equiv) in dried toluene at  $-20\text{ }^\circ\text{C}$  was added  $n\text{-BuLi}$  (1.5 equiv, 2.5 M in hexane) under an argon atmosphere. The mixture was stirred at  $-20\text{ }^\circ\text{C}$  for 2 hours. After completed, the reaction was quenched with saturated  $\text{NH}_4\text{Cl}$  and extracted with EA. The organic layer was dried over  $\text{Na}_2\text{SO}_4$  and concentrated under vacuum. Then the residue was purified by column chromatography to afford the products.

#### General Procedure C:

Method: To a solution of 1-Methoxynaphthalene (1.0 equiv) in  $\text{CH}_3\text{CN}$  at room temperature was added NBS (1.1 equiv). The mixture was stirred at room temperature overnight. After completed, the mixture was concentrated under vacuum. Then the residue was purified by column chromatography to afford the products.

The compound obtained above (1.0 equiv) in  $\text{MeOH}/\text{H}_2\text{O}$  (v:v = 10/1) was successively added  $\text{Pd}(\text{PPh}_3)_4$  (5 mol%),  $\text{K}_2\text{CO}_3$  (2.0 equiv), and  $\text{ArB}(\text{OH})_2$  (1.0 equiv) at room temperature, followed by refluxing for 24 hours under an argon atmosphere. The solution was cooled to room temperature and extracted with  $\text{CH}_2\text{Cl}_2$ , washed with water and brine, dried over  $\text{MgSO}_4$ , and concentrated to give a crude product. Then, it was

dissolved in DCM, and  $\text{BBr}_3$  (1.2 equiv) was added at room temperature, after the reaction was completed,  $\text{H}_2\text{O}$  was added cautiously at  $0\text{ }^\circ\text{C}$ , extracted with  $\text{CH}_2\text{Cl}_2$ , washed with water and brine, dried over  $\text{MgSO}_4$ , then purified by column chromatography to afford the pure products.

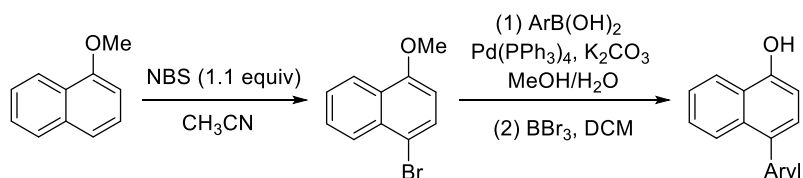

For the synthetic routes to:

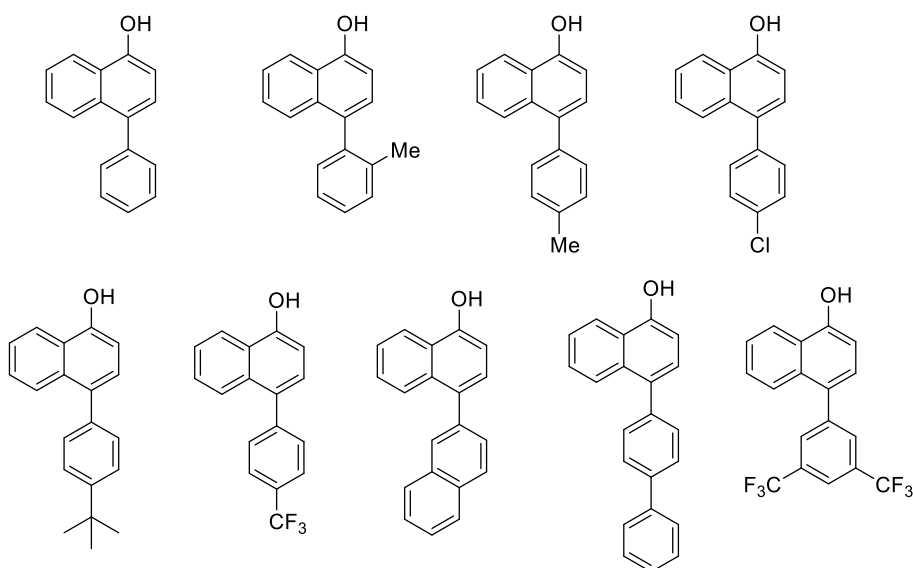

#### General Procedure D:

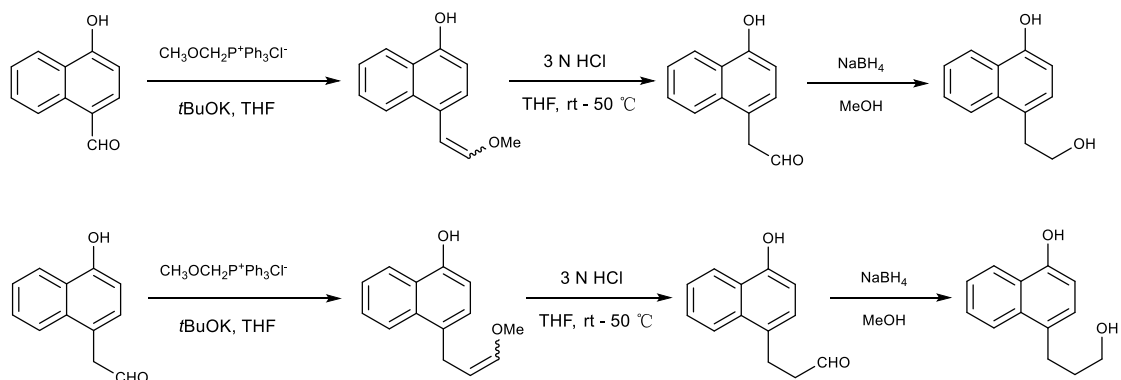

Method: To a solution of (methoxymethyl)triphenylphosphonium chloride (1.5 equiv) in THF, at  $0\text{ }^\circ\text{C}$  under an argon atmosphere, was added *t*-BuOK (1.5 equiv). The mixture was stirred at  $0\text{ }^\circ\text{C}$  for 30 min before the aldehyde (1.0 equiv) was added. The resulting

mixture was allowed to warm to room temperature and stirred for about 10 h. After completion (monitored by TLC), the reaction mixture was quenched with saturated  $\text{NH}_4\text{Cl}$  solution and THF was removed under reduced pressure. The mixture was diluted with  $\text{H}_2\text{O}$  and extracted with ethyl acetate. The combined ethyl acetate extract was washed with brine, dried over anhydrous  $\text{Na}_2\text{SO}_4$  and filtrated. After the solvent was concentrated under reduced pressure, the crude product was purified by silica gel column chromatography.

A round-bottomed flask was filled with argon. To this flask were added the above obtained olefin (1.0 equiv) and THF. To the mixture was added 3 N HCl solution (3.0 equiv). Then the resulting mixture was heated at  $50^\circ\text{C}$  for about 1 h. After completion (monitored by TLC), the reaction mixture was quenched with saturated  $\text{NaHCO}_3$ . The mixture was extracted with ethyl acetate. The combined ethyl acetate extract was washed with brine, dried over anhydrous  $\text{Na}_2\text{SO}_4$  and filtrated. After the solvent was concentrated under reduced pressure, the crude product aldehyde was obtained, which was used in the following reduction step without further purification.

To a solution of the above aldehyde in MeOH was added  $\text{NaBH}_4$  (1.0 equiv). Then the resulting mixture was stirred at room temperature for about 5 min. After completion (monitored by TLC), the reaction mixture was quenched with saturated  $\text{NH}_4\text{Cl}$  and MeOH was removed under reduced pressure. The mixture was diluted with  $\text{H}_2\text{O}$  and extracted with ethyl acetate. The combined ethyl acetate extract was washed with brine, dried over anhydrous  $\text{Na}_2\text{SO}_4$  and filtrated. After the solvent was concentrated under reduced pressure, the crude product was purified by silica gel column chromatography to afford the desired product (30% yield for three steps).

**General Procedure E:**

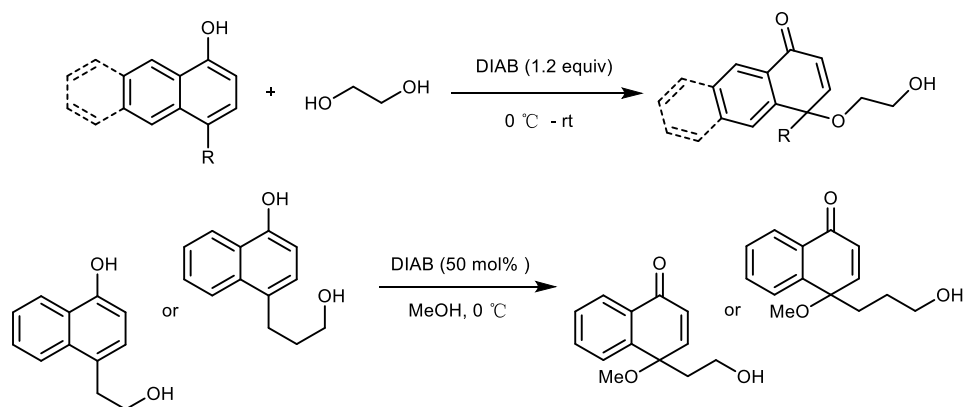

Methods: To a solution of substituted-naphthol (1.0 equiv) in MeOH or glycol at 0°C was added DIAB (1.2 equiv or 50 mol%). The mixture was stirred for further 0.5 - 2 hours. After completed, the mixture was quenched with H<sub>2</sub>O, extracted with ethyl acetate, and the separated organic phase was washed with saturated NaHCO<sub>3</sub> solution, dried with Na<sub>2</sub>SO<sub>4</sub>, then purified via flash column chromatography to give products **1**.

### Synthesis Procedure of L10

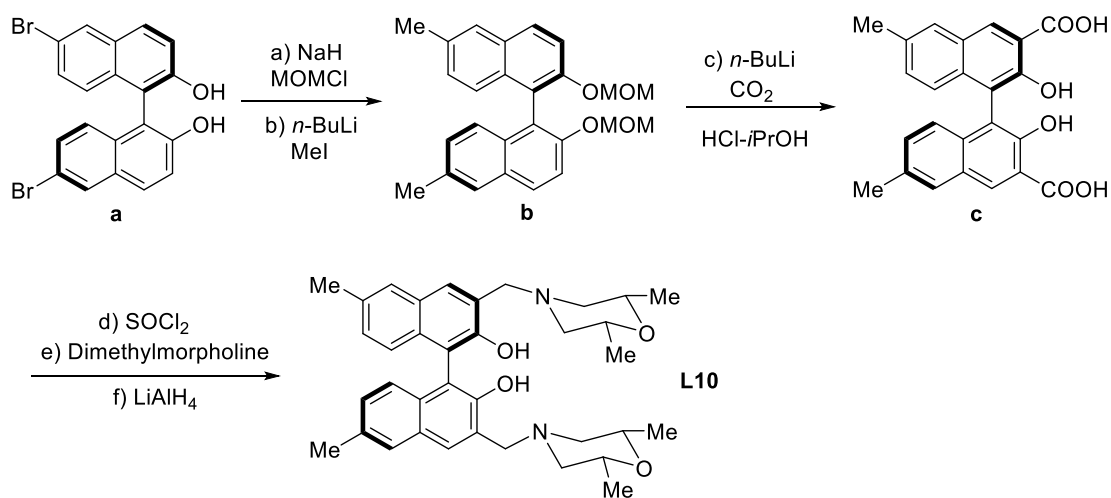

Step 1: **a** (1.0 equiv) was dissolved in dried THF, after cooling to 0 °C, NaH (2.5 equiv) was added, then the mixture was stirred for further 0.5 hours, MOMCl (2.5 equiv) was added. After the reaction was completed, H<sub>2</sub>O was carefully added, then the mixture was extracted with EA, dried with Na<sub>2</sub>SO<sub>4</sub>, filtration, and concentrated to give a crude product which was used directly in the next step without further purification. To the crude product in dried THF, *n*-BuLi (2.5 equiv) was added under an argon atmosphere at -78 °C, then MeI (3.0 equiv) in THF was added after 0.5 hours, the mixture was

stirred at room temperature for 12 hours. After completed, the reaction was quenched with saturated  $\text{NH}_4\text{Cl}$  and extracted with  $\text{CH}_2\text{Cl}_2$ . The organic layer was dried over  $\text{Na}_2\text{SO}_4$  and concentrated to give a crude product which was purified via flash column chromatography to give **b** in 55% yield.

Step 2: **b** (1.0 equiv) was dissolved in dried  $\text{Et}_2\text{O}$ , *n*-BuLi (2.5 equiv) was added at room temperature, then the mixture was stirred for further 2 hours at the same temperature,  $\text{CO}_2$  gas was pumped through a balloon at 0 °C for about 1 hours. After the reaction was completed, quenched with water and the aqueous was separated and acidified to  $\text{pH} = 2$  with hydrochloric acid. The mixture was extracted with EA, dried with  $\text{Na}_2\text{SO}_4$ , filtration, and concentrated. The crude product diluted with THF and added saturated  $\text{HCl}$ -*i*PrOH, then the mixture was stirred for further 4 hours at the room temperature. After completed, concentrated to give a crude product which was purified via flash column chromatography to give **c** in 80% yield.

Step 3: **c** obtained above was treated with  $\text{SOCl}_2$  for 4 hours at reflux. Removal of the excess  $\text{SOCl}_2$  in vacuo to afforded the crude acyl-chloride as a dark brown oil. A solution of Dimethylmorpholine (10 equiv) in THF was then added dropwise to the chloride in THF at 0 °C. The reaction mixture was stirred at room temperature for about 8 hours. After the reaction was completed, the mixture was poured into 1 N HCl. Extracted with  $\text{CH}_2\text{Cl}_2$ , dried with  $\text{Na}_2\text{SO}_4$  and concentrated to give a crude product which was purified via flash column chromatography to give amide in 60% yield.

Step 4: To a solution of above amide (1.0 equiv) in dry THF at 0°C was added  $\text{LiAlH}_4$  (4.0 equiv). The mixture was stirred at reflux for about 4 hours. After completed, the mixture was cooled to 0 °C, quenched with saturated KF solution, filtered through celite, and purified via flash column chromatography to give pure **L10** (85% yield).

Pale yellow solid, m.p. 228 – 229°C;  $[\alpha]_{\text{D}}^{26.3} = 71.0$  ( $c = 1.0$  in  $\text{CHCl}_3$ );  $^1\text{H NMR}$  (300 MHz,  $\text{CDCl}_3$ ):  $\delta$  10.93 (s, 2H), 7.54 (s, 4H), 7.04 (dd,  $J = 8.7, 4.9$  Hz, 4H), 4.03 (d,  $J = 13.6$  Hz, 2H), 3.83 (d,  $J = 13.7$  Hz, 2H), 3.69 – 3.50 (m, 4H), 2.86 (m,  $J = 16.9, 11.4$  Hz, 4H), 2.42 (s, 6H), 1.91 (dd,  $J = 23.9, 11.1$  Hz, 4H), 1.12 (m,  $J = 6.1, 4.2$  Hz, 12H);

$^{13}\text{C}$  NMR (75 MHz,  $\text{CDCl}_3$ ):  $\delta$  152.52, 132.35, 131.88, 128.38, 128.28, 127.45, 126.71, 124.72, 123.35, 116.55, 77.47, 77.25, 77.05, 76.62, 71.48, 71.40, 62.01, 58.68, 58.25, 21.33, 19.01, 18.98; **IR** (neat): 3006, 2973, 2869, 1917, 1614, 1507, 1457, 1142, 755, 665, 555  $\text{cm}^{-1}$ ; **HRMS** (ESI):  $\text{C}_{36}\text{H}_{44}\text{N}_2\text{O}_4$   $[\text{M} + \text{H}]^+$  calcd: 569.3374, found: 569.3388.

### Experimental Procedures for the Oxa-Michael KR Reaction

To a stirred solution of **L10** (5.68 mg, 0.01 mmol) in toluene (0.5 mL) was added  $\text{Et}_2\text{Zn}$  (10  $\mu\text{L}$ , 1.0 M in toluene, 0.01 mmol) under an argon atmosphere, the mixture was then stirred at room temperature for 30 min to generate the catalyst. The substrate **1** (0.1 mmol) and  $\text{BocNH}_2$  (4.68 mg, 40 mol%) in toluene (0.5 mL) was quickly added to the flask containing the in situ generated zinc catalyst. After the addition, the reaction was stirred at  $-20\text{ }^\circ\text{C}$  to room temperature and analyzed by TLC. After completion the reaction was quenched with saturated  $\text{NH}_4\text{Cl}$  and extracted with  $\text{CH}_2\text{Cl}_2$ . The organic layer was dried over  $\text{Na}_2\text{SO}_4$  and concentrated under vacuum. Then the residue was purified by column chromatography to afford the product **1\*** and **2**.

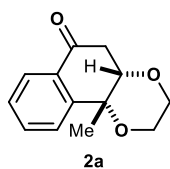

With 10 mol% catalyst at  $-20\text{ }^\circ\text{C}$  for 3 h.

White solid, m.p.  $135 - 136\text{ }^\circ\text{C}$ ; 48% yield; 90% ee determined by HPLC on Chiralpak IA-H column (*n*-hexane/*i*-PrOH = 4/6, flow rate = 1.0 mL/min,  $t_{\text{major}} = 5.42$  min,  $t_{\text{minor}} = 7.46$  min);  $[\alpha]_{\text{D}}^{28.0} = 27.0$  ( $c = 1.0$  in  $\text{CHCl}_3$ );  **$^1\text{H}$  NMR** (300 MHz,  $\text{CDCl}_3$ ):  $\delta$  8.09 – 7.88 (m, 1H), 7.57 (dd,  $J = 8.0, 1.5$  Hz, 2H), 7.34 (s, 1H), 3.98 (s, 1H), 3.76 – 3.64 (m, 1H), 3.60 – 3.43 (m, 3H), 2.94 – 2.73 (m, 2H), 1.46 (s, 3H);  **$^{13}\text{C}$  NMR** (75 MHz,  $\text{CDCl}_3$ ):  $\delta$  194.51, 144.52, 134.58, 131.85, 127.77, 126.85, 126.27, 79.21, 77.49, 77.07, 76.64, 73.00, 66.80, 61.35, 42.61, 28.32; **IR** (neat): 3368, 2923, 2853, 1691, 1496, 1454, 1287, 1111, 760, 701  $\text{cm}^{-1}$ ; **HRMS** (ESI):  $\text{C}_{13}\text{H}_{14}\text{O}_3$   $[\text{M} + \text{Na}]^+$  calcd: 241.0835, found: 241.0839.

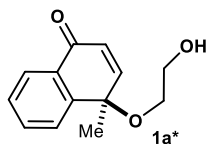

Purple liquid; 45% yield; 99% ee determined by HPLC on Chiralpak IC-H column (*n*-hexane/*i*-PrOH = 8/2, flow rate = 1.0 mL/min,  $t_{\text{major}} = 19.56$  min,  $t_{\text{minor}} = 17.25$  min);  $[\alpha]_{\text{D}}^{28.0} = -80.0$  ( $c = 1.0$  in  $\text{CHCl}_3$ );  **$^1\text{H NMR}$**  (300 MHz,  $\text{CDCl}_3$ ):  $\delta$  8.13 (d,  $J = 7.7$  Hz, 1H), 7.65 (tt,  $J = 7.9, 4.0$  Hz, 2H), 7.51 – 7.40 (m, 1H), 7.00 (d,  $J = 10.3$  Hz, 1H), 6.50 (d,  $J = 10.3$  Hz, 1H), 3.68 (d,  $J = 4.1$  Hz, 2H), 3.33 (dt,  $J = 14.1, 4.7$  Hz, 1H), 3.17 – 3.03 (m, 1H), 2.70 (s, 1H), 1.64 (s, 3H);  **$^{13}\text{C NMR}$**  (75 MHz,  $\text{CDCl}_3$ ):  $\delta$  184.25, 152.59, 144.87, 133.37, 131.10, 130.06, 128.20, 126.76, 126.22, 77.58, 77.16, 76.73, 73.57, 66.31, 61.97, 30.47; **IR** (neat): 3421, 2923, 2854, 1716, 1456, 1364, 1298, 1077, 721, 529  $\text{cm}^{-1}$ ; **HRMS** (ESI):  $\text{C}_{13}\text{H}_{14}\text{O}_3$   $[\text{M} + \text{Na}]^+$  calcd: 241.0835, found: 241.0833.

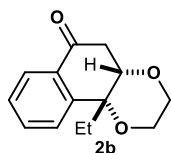

With 10 mol% catalyst at  $-20$  °C for 3 h.

Yellow solid, m.p.  $85 - 86$  °C; 49% yield; 90.5% ee determined by HPLC on Chiralpak IA-H column (*n*-hexane/*i*-PrOH = 4/6, flow rate = 1.0 mL/min,  $t_{\text{major}} = 5.14$  min,  $t_{\text{minor}} = 7.72$  min);  $[\alpha]_{\text{D}}^{27.3} = 43.0$  ( $c = 1.0$  in  $\text{CHCl}_3$ );  **$^1\text{H NMR}$**  (300 MHz,  $\text{CDCl}_3$ ):  $\delta$  8.05 (dd,  $J = 7.8, 0.7$  Hz, 1H), 7.69 – 7.51 (m, 2H), 7.47 – 7.35 (m, 1H), 4.15 (t,  $J = 3.1$  Hz, 1H), 3.84 – 3.70 (m, 1H), 3.68 – 3.51 (m, 3H), 2.90 (qd,  $J = 17.9, 3.2$  Hz, 2H), 1.93 – 1.74 (m, 2H), 1.02 (t,  $J = 7.5$  Hz, 3H);  **$^{13}\text{C NMR}$**  (75 MHz,  $\text{CDCl}_3$ ):  $\delta$  194.56, 143.70, 133.96, 132.00, 127.64, 127.10, 127.08, 77.58, 77.47, 77.05, 76.62, 74.86, 66.89, 61.22, 42.15, 33.80, 7.53; **IR** (neat): 3349, 2961, 2855, 1600, 1455, 1286, 1112, 965, 763, 597  $\text{cm}^{-1}$ ; **HRMS** (ESI):  $\text{C}_{14}\text{H}_{16}\text{O}_3$   $[\text{M} + \text{Na}]^+$  calcd: 255.0992, found: 255.0993.

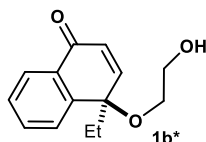

Purple liquid; 42% yield; 99% ee determined by HPLC on Chiralpak OD-H column (*n*-hexane/*i*-PrOH = 9/1, flow rate = 1.0 mL/min,  $t_{\text{major}} = 15.71$  min,  $t_{\text{minor}} = 11.80$  min);  $[\alpha]_{\text{D}}^{26.1} = -46.0$  ( $c = 1.0$  in  $\text{CHCl}_3$ );  **$^1\text{H NMR}$**  (300 MHz,  $\text{CDCl}_3$ ):  $\delta$  8.13 (d,  $J = 7.7$  Hz,



1H), 7.70 – 7.57 (m, 2H), 7.49 – 7.39 (m, 1H), 6.89 (d,  $J = 10.4$  Hz, 1H), 6.59 (d,  $J = 10.4$  Hz, 1H), 3.68 (d,  $J = 4.3$  Hz, 2H), 3.36 (dt,  $J = 9.8, 5.0$  Hz, 1H), 3.22 – 3.07 (m, 1H), 2.34 (s, 1H), 2.03 (dt,  $J = 14.7, 4.4$  Hz, 2H), 0.57 (t,  $J = 7.5$  Hz, 3H);  $^{13}\text{C}$  NMR (75 MHz,  $\text{CDCl}_3$ ):  $\delta$  184.48, 151.40, 143.61, 133.33, 132.30, 131.70, 128.16, 126.60, 125.93, 77.66, 77.51, 77.08, 76.66, 66.07, 62.10, 35.69, 7.97; **IR** (neat): 3458, 2928, 2859, 1668, 1601, 1457, 1300, 1085, 892, 762  $\text{cm}^{-1}$ ; **HRMS** (ESI):  $\text{C}_{14}\text{H}_{16}\text{O}_3$   $[\text{M} + \text{Na}]^+$  calcd: 255.0992, found: 255.1000.

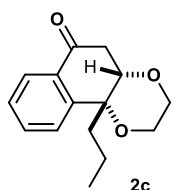

With 10 mol% catalyst at  $-20$  °C for 1 h.

Colourless oil liquid; 48% yield; 90% ee determined by HPLC on Chiralpak IA-H column ( $n$ -hexane/ $i$ -PrOH = 4/6, flow rate = 1.0 mL/min,  $t_{\text{major}} = 4.98$  min,  $t_{\text{minor}} = 7.47$  min);  $[\alpha]_{\text{D}}^{28.3} = 36.0$  ( $c = 1.0$  in  $\text{CHCl}_3$ );  $^1\text{H}$  NMR (300 MHz,  $\text{CDCl}_3$ ):  $\delta$  8.05 (dd,  $J = 7.8, 0.9$  Hz, 1H), 7.80 – 7.51 (m, 2H), 7.48 – 7.33 (m, 1H), 4.15 (t,  $J = 3.1$  Hz, 1H), 3.84 – 3.68 (m, 1H), 3.67 – 3.45 (m, 3H), 2.90 (qd,  $J = 17.9, 3.2$  Hz, 2H), 1.83 – 1.65 (m, 2H), 1.58 – 1.39 (m, 2H), 0.89 (t,  $J = 7.2$  Hz, 3H);  $^{13}\text{C}$  NMR (75 MHz,  $\text{CDCl}_3$ ):  $\delta$  194.54, 143.89, 133.97, 131.94, 127.60, 127.02, 77.71, 77.52, 77.10, 76.67, 75.01, 66.88, 61.22, 43.34, 42.17, 16.37, 14.46; **IR** (neat): 3380, 2924, 1698, 1601, 1463, 1373, 1278, 1175, 1142, 761  $\text{cm}^{-1}$ ; **HRMS** (ESI):  $\text{C}_{15}\text{H}_{18}\text{O}_3$   $[\text{M} + \text{Na}]^+$  calcd: 269.1148, found: 269.1151.

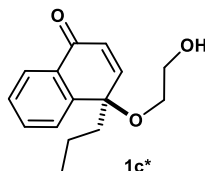

Purple liquid; 45% yield; 99% ee determined by HPLC on Chiralpak OD-H column ( $n$ -hexane/ $i$ -PrOH = 9/1, flow rate = 1.0 mL/min,  $t_{\text{major}} = 15.16$  min,  $t_{\text{minor}} = 11.90$  min);  $[\alpha]_{\text{D}}^{26.6} = -39.0$  ( $c = 1.0$  in  $\text{CHCl}_3$ );  $^1\text{H}$  NMR (300 MHz,  $\text{CDCl}_3$ ):  $\delta$  8.12 (d,  $J = 7.7$  Hz, 1H), 7.63 (d,  $J = 4.0$  Hz, 2H), 7.45 (m,  $J = 8.2, 5.0, 3.5$  Hz, 1H), 6.93 (d,  $J = 10.4$  Hz, 1H), 6.56 (d,  $J = 10.3$  Hz, 1H), 3.68 (d,  $J = 3.2$  Hz, 2H), 3.35 (m,  $J = 9.8, 4.6$  Hz, 1H),

3.23 – 3.08 (m, 1H), 2.38 (s, 1H), 2.02 – 1.92 (m, 2H), 1.30 – 1.08 (m, 2H), 0.77 (d,  $J = 4.2$  Hz, 3H);  $^{13}\text{C}$  NMR (75 MHz,  $\text{CDCl}_3$ ):  $\delta$  184.46, 151.77, 144.01, 133.31, 132.07, 131.38, 128.13, 126.62, 125.98, 77.52, 77.10, 76.99, 76.67, 65.89, 62.09, 45.11, 16.94, 14.02; IR (neat): 3443, 2924, 1666, 1600, 1455, 1377, 1299, 1066, 788, 765  $\text{cm}^{-1}$ ; HRMS (ESI):  $\text{C}_{14}\text{H}_{16}\text{O}_3$   $[\text{M} + \text{Na}]^+$  calcd: 269.1148, found: 269.1153.

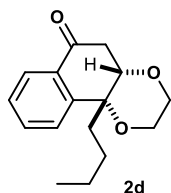

With 10 mol% catalyst at  $-15$  °C for 3 h.

Yellow liquid; 46% yield; 92% ee determined by HPLC on Chiralpak IA-H column ( $n$ -hexane/ $i$ -PrOH = 4/6, flow rate = 1.0 mL/min,  $t_{\text{major}} = 4.91$  min,  $t_{\text{minor}} = 7.77$  min);  $[\alpha]_{\text{D}}^{28.4} = 28.0$  ( $c = 1.0$  in  $\text{CHCl}_3$ );  $^1\text{H}$  NMR (300 MHz,  $\text{CDCl}_3$ ):  $\delta$  7.97 (d,  $J = 7.8$  Hz, 1H), 7.63 – 7.44 (m, 2H), 7.33 (t,  $J = 7.4$  Hz, 1H), 4.08 (t,  $J = 3.1$  Hz, 1H), 3.68 (dt,  $J = 13.4, 5.2$  Hz, 1H), 3.60 – 3.41 (m, 3H), 2.83 (qd,  $J = 17.9, 3.1$  Hz, 2H), 1.68 (dddd,  $J = 21.9, 17.6, 8.8, 4.5$  Hz, 2H), 1.48 – 1.34 (m, 2H), 1.20 (dt,  $J = 14.7, 7.2$  Hz, 2H), 0.81 (t,  $J = 7.3$  Hz, 3H);  $^{13}\text{C}$  NMR (75 MHz,  $\text{CDCl}_3$ )  $\delta$  194.55, 143.99, 134.01, 131.93, 127.60, 127.03, 126.99, 77.66, 77.50, 77.08, 76.65, 74.97, 66.89, 61.25, 42.17, 41.02, 25.18, 23.17, 14.00; IR (neat): 3368, 2923, 2855, 1694, 1601, 1452, 1288, 1110, 760, 565  $\text{cm}^{-1}$ ; HRMS (ESI):  $\text{C}_{16}\text{H}_{20}\text{O}_3$   $[\text{M} + \text{Na}]^+$  calcd: 283.1305, found: 283.1308.

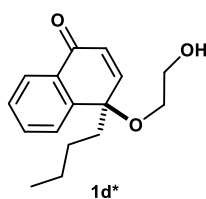

Purple liquid; 43% yield; 99% ee determined by HPLC on Chiralpak OD-H column ( $n$ -hexane/ $i$ -PrOH = 9/1, flow rate = 1.0 mL/min,  $t_{\text{major}} = 10.89$  min,  $t_{\text{minor}} = 9.63$  min);  $[\alpha]_{\text{D}}^{25.7} = -29.0$  ( $c = 1.0$  in  $\text{CHCl}_3$ );  $^1\text{H}$  NMR (300 MHz,  $\text{CDCl}_3$ ):  $\delta$  8.13 (d,  $J = 7.7$  Hz, 1H), 7.71 – 7.56 (m, 2H), 7.52 – 7.39 (m, 1H), 6.91 (d,  $J = 10.3$  Hz, 1H), 6.57 (d,  $J = 10.3$  Hz, 1H), 3.67 (s, 2H), 3.34 (dt,  $J = 9.7, 4.7$  Hz, 1H), 3.22 – 3.04 (m, 1H), 2.19 (s, 1H), 1.98 (dt,  $J = 12.8, 5.6$  Hz, 2H), 1.29 – 1.07 (m, 4H), 0.76 (t,  $J = 7.1$  Hz, 3H);  $^{13}\text{C}$  NMR (75 MHz,  $\text{CDCl}_3$ ):  $\delta$  184.48, 151.70, 143.96, 133.33, 132.11, 131.44, 128.15,

126.64, 125.95, 77.49, 77.07, 77.00, 76.64, 65.86, 62.13, 42.68, 25.61, 22.63, 13.77;  
**IR** (neat): 3457, 2925, 2855, 1728, 1669, 1601, 1457, 1299, 1085, 766  $\text{cm}^{-1}$ ; **HRMS**  
(ESI):  $\text{C}_{16}\text{H}_{20}\text{O}_3$   $[\text{M} + \text{Na}]^+$  calcd: 283.1305, found: 283.1308.

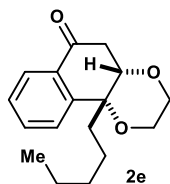

With 10 mol% catalyst at  $-20\text{ }^\circ\text{C}$  for 2 h.

Yellow liquid; 50% yield; 92% ee determined by HPLC on Chiralpak IA-H column ( $n$ -hexane/ $i$ -PrOH = 4/6, flow rate = 1.0 mL/min,  $t_{\text{major}} = 4.79$  min,  $t_{\text{minor}} = 6.84$  min);  $[\alpha]_{\text{D}}^{27.6} = 46.0$  ( $c = 1.0$  in  $\text{CHCl}_3$ );  **$^1\text{H}$  NMR** (300 MHz,  $\text{CDCl}_3$ ):  $\delta$  8.05 (d,  $J = 7.7$  Hz, 1H), 7.61 (dt,  $J = 18.2, 7.0$  Hz, 2H), 7.45 – 7.35 (m, 1H), 4.16 (t,  $J = 3.0$  Hz, 1H), 3.76 (dt,  $J = 13.3, 5.3$  Hz, 1H), 3.69 – 3.48 (m, 3H), 2.90 (qd,  $J = 17.9, 3.1$  Hz, 2H), 1.75 (dtdd,  $J = 17.7, 13.3, 9.0, 4.6$  Hz, 2H), 1.55 – 1.39 (m, 2H), 1.33 – 1.21 (m, 4H), 0.86 (t,  $J = 7.0$  Hz, 3H);  **$^{13}\text{C}$  NMR** (75 MHz,  $\text{CDCl}_3$ ):  $\delta$  194.57, 144.01, 134.01, 131.93, 127.60, 127.03, 126.98, 77.64, 77.50, 77.08, 76.65, 75.00, 66.89, 61.24, 42.17, 41.24, 32.23, 22.71, 22.55, 14.04; **IR** (neat): 3368, 2924, 2854, 1693, 1601, 1454, 1287, 1112, 767, 562  $\text{cm}^{-1}$ ; **HRMS** (ESI):  $\text{C}_{17}\text{H}_{22}\text{O}_3$   $[\text{M} + \text{Na}]^+$  calcd: 297.1461, found: 297.1471.

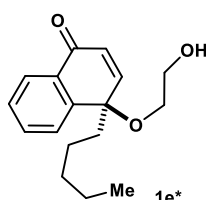

Yellow liquid; 48% yield; 95% ee determined by HPLC on Chiralpak OD-H column ( $n$ -hexane/ $i$ -PrOH = 9/1, flow rate = 1.0 mL/min,  $t_{\text{major}} = 11.55$  min,  $t_{\text{minor}} = 10.23$  min);  $[\alpha]_{\text{D}}^{26.3} = -25.0$  ( $c = 1.0$  in  $\text{CHCl}_3$ );  **$^1\text{H}$  NMR** (300 MHz,  $\text{CDCl}_3$ ):  $\delta$  8.13 (d,  $J = 7.8$  Hz, 1H), 7.65 (t,  $J = 6.0$  Hz, 2H), 7.52 – 7.40 (m, 1H), 6.93 (d,  $J = 10.3$  Hz, 1H), 6.57 (d,  $J = 10.3$  Hz, 1H), 3.68 (s, 2H), 3.42 – 3.28 (m, 1H), 3.21 – 3.08 (m, 1H), 2.55 (s, 1H), 2.07 – 1.88 (m, 2H), 1.13 (s, 6H), 0.76 (t,  $J = 6.5$  Hz, 3H);  **$^{13}\text{C}$  NMR** (75 MHz,  $\text{CDCl}_3$ ):  $\delta$  184.50, 151.81, 144.00, 133.32, 132.08, 131.38, 128.12, 126.60, 125.96, 77.55, 77.13, 77.03, 76.70, 65.94, 62.05, 42.82, 31.64, 23.11, 22.24, 13.86; **IR** (neat): 3456, 2925, 2853, 1744, 1671, 1457, 1371, 1279, 1141, 761  $\text{cm}^{-1}$ ; **HRMS** (ESI):  $\text{C}_{17}\text{H}_{22}\text{O}_3$   $[\text{M} +$

$\text{Na}]^+$  calcd: 297.1461, found: 297.1474.

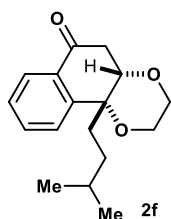

With 10 mol% catalyst at  $-20\text{ }^\circ\text{C}$  for 2 h.

Yellow liquid; 53% yield; 91% ee determined by HPLC on Chiralpak IA-H column (*n*-hexane/*i*-PrOH = 4/6, flow rate = 1.0 mL/min,  $t_{\text{major}} = 4.72$  min,  $t_{\text{minor}} = 7.27$  min);  $[\alpha]_{\text{D}}^{27.3} = 34.0$  ( $c = 1.0$  in  $\text{CHCl}_3$ );  $^1\text{H NMR}$  (300 MHz,  $\text{CDCl}_3$ ):  $\delta$  7.97 (d,  $J = 7.8$  Hz, 1H), 7.62 – 7.44 (m, 2H), 7.36 – 7.26 (m, 1H), 4.08 (t,  $J = 3.1$  Hz, 1H), 3.68 (dt,  $J = 13.6, 5.2$  Hz, 1H), 3.60 – 3.39 (m, 3H), 2.82 (qd,  $J = 17.9, 3.1$  Hz, 2H), 1.78 – 1.60 (m, 2H), 1.43 – 1.26 (m, 3H), 0.78 (dd,  $J = 6.2, 2.4$  Hz, 6H);  $^{13}\text{C NMR}$  (75 MHz,  $\text{CDCl}_3$ ):  $\delta$  193.52, 143.14, 133.01, 130.91, 126.57, 126.00, 125.91, 76.50, 76.46, 76.04, 75.62, 73.96, 65.85, 60.22, 41.11, 38.25, 30.83, 27.46, 21.58, 21.39; **IR** (neat): 3368, 2924, 2855, 1693, 1601, 1452, 1287, 1108, 759, 479  $\text{cm}^{-1}$ ; **HRMS** (ESI):  $\text{C}_{17}\text{H}_{22}\text{O}_3$   $[\text{M} + \text{Na}]^+$  calcd: 297.1461, found: 297.1459.

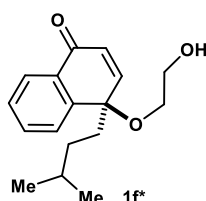

Yellow liquid; 45% yield; 98% ee determined by HPLC on Chiralpak OD-H column (*n*-hexane/*i*-PrOH = 9/1, flow rate = 1.0 mL/min,  $t_{\text{major}} = 11.41$  min,  $t_{\text{minor}} = 9.63$  min);  $[\alpha]_{\text{D}}^{26.5} = -22.0$  ( $c = 1.0$  in  $\text{CHCl}_3$ );  $^1\text{H NMR}$  (300 MHz,  $\text{CDCl}_3$ )  $\delta$  8.13 (d,  $J = 7.7$  Hz, 1H), 7.69 – 7.58 (m, 2H), 7.46 (ddd,  $J = 8.2, 6.3, 2.3$  Hz, 1H), 6.89 (d,  $J = 10.3$  Hz, 1H), 6.57 (d,  $J = 10.3$  Hz, 1H), 3.67 (s, 2H), 3.39 – 3.28 (m, 1H), 3.20 – 3.05 (m, 1H), 2.17 (s, 1H), 2.05 – 1.92 (m, 2H), 1.37 (dd,  $J = 13.3, 6.6$  Hz, 1H), 1.07 – 0.96 (m, 1H), 0.75 (dd,  $J = 13.8, 6.6$  Hz, 6H), 0.60 – 0.48 (m, 1H);  $^{13}\text{C NMR}$  (75 MHz,  $\text{CDCl}_3$ ):  $\delta$  184.50, 151.63, 143.89, 133.36, 132.15, 131.51, 128.17, 126.64, 125.90, 77.49, 77.06, 76.64, 65.86, 62.13, 40.79, 32.22, 29.70, 28.02, 22.40, 22.26; **IR** (neat): 3457, 2925, 2856, 1668, 1601, 1457, 1379, 1299, 1085, 766  $\text{cm}^{-1}$ ; **HRMS** (ESI):  $\text{C}_{17}\text{H}_{22}\text{O}_3$   $[\text{M} + \text{Na}]^+$

calcd: 297.1461, found: 297.1469.

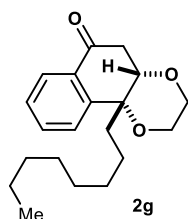

With 10 mol% catalyst at -20 °C for 2 h.

Yellow liquid; 48% yield; 91% ee determined by HPLC on Chiralpak IA-H column (*n*-hexane/*i*-PrOH = 4/6, flow rate = 1.0 mL/min,  $t_{\text{major}} = 4.84$  min,  $t_{\text{minor}} = 7.04$  min);  $[\alpha]_{\text{D}}^{27.2} = 39.0$  ( $c = 1.0$  in  $\text{CHCl}_3$ );  $^1\text{H NMR}$  (300 MHz,  $\text{CDCl}_3$ ):  $\delta$  8.05 (d,  $J = 7.8$  Hz, 1H), 7.72 – 7.50 (m, 2H), 7.46 – 7.36 (t, 1H), 4.16 (t,  $J = 3.1$  Hz, 1H), 3.85 – 3.72 (m, 1H), 3.67 – 3.50 (m, 3H), 2.90 (qd,  $J = 17.9, 3.1$  Hz, 2H), 1.89 – 1.62 (m, 2H), 1.48 (m,  $J = 14.1, 9.8$  Hz, 2H), 1.24 (m, 10H), 0.86 (t,  $J = 6.6$  Hz, 3H);  $^{13}\text{C NMR}$  (75 MHz,  $\text{CDCl}_3$ ):  $\delta$  194.57, 144.02, 134.01, 131.93, 127.60, 127.04, 126.98, 77.65, 77.49, 77.07, 76.64, 75.01, 66.89, 61.25, 42.18, 41.29, 31.82, 30.08, 29.48, 29.25, 23.06, 22.63, 14.11; **IR** (neat): 3368, 2957, 1692, 1601, 1455, 1287, 1130, 1112, 760, 665  $\text{cm}^{-1}$ ; **HRMS** (ESI):  $\text{C}_{20}\text{H}_{28}\text{O}_3$   $[\text{M} + \text{Na}]^+$  calcd: 339.1931, found: 339.1928.

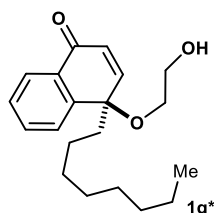

Purple liquid; 46% yield; 93% ee determined by HPLC on Chiralpak OD-H column (*n*-hexane/*i*-PrOH = 9/1, flow rate = 1.0 mL/min,  $t_{\text{major}} = 10.79$  min,  $t_{\text{minor}} = 8.64$  min);  $[\alpha]_{\text{D}}^{26.0} = -24.0$  ( $c = 1.0$  in  $\text{CHCl}_3$ );  $^1\text{H NMR}$  (300 MHz,  $\text{CDCl}_3$ ):  $\delta$  8.13 (d,  $J = 7.7$  Hz, 1H), 7.71 – 7.59 (m, 2H), 7.45 (m,  $J = 8.1, 5.6, 2.9$  Hz, 1H), 6.91 (d,  $J = 10.3$  Hz, 1H), 6.57 (d,  $J = 10.3$  Hz, 1H), 3.69 (dd,  $J = 15.9, 5.7$  Hz, 2H), 3.42 – 3.28 (m, 1H), 3.23 – 3.09 (m, 1H), 2.33 (s, 1H), 1.98 (dd,  $J = 8.0, 5.9$  Hz, 2H), 1.31 – 1.08 (m, 12H), 0.83 (t,  $J = 6.9$  Hz, 3H);  $^{13}\text{C NMR}$  (75 MHz,  $\text{CDCl}_3$ ):  $\delta$  184.47, 151.73, 143.98, 133.31, 132.10, 131.42, 128.13, 126.63, 125.95, 77.51, 77.08, 77.03, 76.66, 65.89, 62.10, 42.88, 31.72,

29.50, 29.16, 29.08, 23.45, 22.56, 14.06; **IR** (neat): 3456, 2925, 1727, 1668, 1600, 1457, 1378, 1301, 1084, 766  $\text{cm}^{-1}$ ; **HRMS** (ESI):  $\text{C}_{16}\text{H}_{20}\text{O}_3$   $[\text{M} + \text{Na}]^+$  calcd: 339.1931, found: 339.1937.

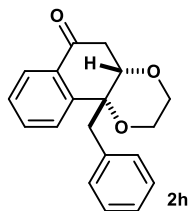

With 10 mol% catalyst at  $-10\text{ }^\circ\text{C}$  for 1 h.

Yellow solid, m.p.  $85 - 86\text{ }^\circ\text{C}$ ; 47% yield; 94% ee determined by HPLC on Chiralpak IA-H column (*n*-hexane/*i*-PrOH = 4/6, flow rate = 1.0 mL/min,  $t_{\text{major}} = 6.49$  min,  $t_{\text{minor}} = 9.65$  min);  $[\alpha]_{\text{D}}^{27.5} = 69.0$  ( $c = 1.0$  in  $\text{CHCl}_3$ );  **$^1\text{H}$  NMR** (300 MHz,  $\text{CDCl}_3$ ):  $\delta$  7.98 (d,  $J = 7.8$ , 1.1 Hz, 1H), 7.48 (td,  $J = 7.6$ , 1.3 Hz, 1H), 7.39 – 7.24 (m, 2H), 7.20 – 7.12 (m, 3H), 7.03 (m,  $J = 6.0$ , 3.3 Hz, 2H), 3.91 (t,  $J = 3.1$  Hz, 1H), 3.62 – 3.44 (m, 4H), 3.11 – 2.82 (m, 3H), 2.72 (dd,  $J = 17.8$ , 3.1 Hz, 1H);  **$^{13}\text{C}$  NMR** (75 MHz,  $\text{CDCl}_3$ ):  $\delta$  194.56, 143.34, 135.56, 134.04, 132.16, 130.77, 128.00, 127.89, 127.27, 126.90, 126.87, 77.51, 77.08, 76.66, 75.24, 66.67, 61.27, 47.43, 42.25; **IR** (neat): 3368, 2923, 1730, 1693, 1601, 1455, 1286, 1112, 766, 665  $\text{cm}^{-1}$ ; **HRMS** (ESI):  $\text{C}_{19}\text{H}_{18}\text{O}_3$   $[\text{M} + \text{Na}]^+$  calcd: 317.1148, found: 317.1155.

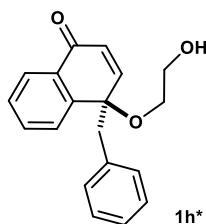

Yellow solid, m.p.  $68 - 69\text{ }^\circ\text{C}$ ; 48% yield; 91% ee determined by HPLC on Chiralpak OD-H column (*n*-hexane/*i*-PrOH = 8/2, flow rate = 1.0 mL/min,  $t_{\text{major}} = 7.15$  min,  $t_{\text{minor}} = 6.44$  min);  $[\alpha]_{\text{D}}^{27.8} = 28.0$  ( $c = 1.0$  in  $\text{CHCl}_3$ );  **$^1\text{H}$  NMR** (300 MHz,  $\text{CDCl}_3$ ):  $\delta$  8.01 (d,  $J = 7.8$ , 0.7 Hz, 1H), 7.68 (m,  $J = 9.2$ , 7.8, 1.2 Hz, 2H), 7.45 (m,  $J = 14.7$ , 1.5 Hz, 1H), 7.18 – 7.02 (m, 3H), 6.88 (d, 1H), 6.84 – 6.73 (m, 2H), 6.42 (d,  $J = 10.4$  Hz, 1H), 3.79 – 3.64 (m, 2H), 3.47 – 3.19 (m, 3H), 3.14 (d,  $J = 13.1$  Hz, 1H), 2.12 (s, 1H);  **$^{13}\text{C}$  NMR** (75 MHz,  $\text{CDCl}_3$ ):  $\delta$  183.81, 150.97, 143.55, 134.65, 133.03, 132.08, 131.40,

130.58, 128.34, 127.80, 127.00, 126.64, 126.37, 77.51, 77.27, 77.09, 76.66, 66.21, 62.14, 50.11; **IR** (neat): 3455, 2927, 1712, 1700, 1600, 1456, 1377, 1299, 764, 479  $\text{cm}^{-1}$ ; **HRMS** (ESI):  $\text{C}_{19}\text{H}_{18}\text{O}_3$   $[\text{M} + \text{Na}]^+$  calcd: 317.1148, found: 317.1151.

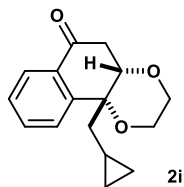

With 10 mol% catalyst at  $-20\text{ }^\circ\text{C}$  for 4 h.

Yellow liquid; 49% yield; 92% ee determined by HPLC on Chiralpak IA-H column (*n*-hexane/*i*-PrOH = 4/6, flow rate = 1.0 mL/min,  $t_{\text{major}} = 5.27$  min,  $t_{\text{minor}} = 7.63$  min);  $[\alpha]_{\text{D}}^{28.3} = 36.0$  ( $c = 1.0$  in  $\text{CHCl}_3$ );  **$^1\text{H}$  NMR** (300 MHz,  $\text{CDCl}_3$ ):  $\delta$  8.00 (d,  $J = 7.8$  Hz, 1H), 7.68 – 7.52 (m, 2H), 7.42 – 7.31 (m, 1H), 4.34 (t,  $J = 3.1$  Hz, 1H), 3.76 (td,  $J = 11.8, 3.6$  Hz, 1H), 3.65 – 3.49 (m, 3H), 2.89 (qd,  $J = 17.8, 3.2$  Hz, 2H), 1.82 (dd,  $J = 14.6, 5.8$  Hz, 1H), 1.54 (dd,  $J = 14.7, 7.6$  Hz, 1H), 0.96 (tdd,  $J = 7.9, 5.5, 2.8$  Hz, 1H), 0.56 – 0.36 (m, 2H), 0.01 (dt,  $J = 9.1, 5.0$  Hz, 1H), -0.11 (td,  $J = 9.1, 5.0$  Hz, 1H);  **$^{13}\text{C}$  NMR** (75 MHz,  $\text{CDCl}_3$ ):  $\delta$  194.74, 144.02, 134.09, 132.04, 127.66, 127.07, 126.80, 77.48, 77.20, 77.06, 76.63, 75.66, 66.82, 61.21, 46.40, 42.47, 5.85, 5.49, 4.93; **IR** (neat): 3346, 2923, 2853, 1739, 1683, 1598, 1456, 1290, 1102, 779  $\text{cm}^{-1}$ ; **HRMS** (ESI):  $\text{C}_{16}\text{H}_{18}\text{O}_3$   $[\text{M} + \text{Na}]^+$  calcd: 281.1148, found: 281.1150.

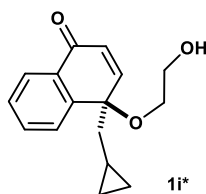

Purple liquid; 46% yield; 99% ee determined by HPLC on Chiralpak OD-H column (*n*-hexane/*i*-PrOH = 9/1, flow rate = 1.0 mL/min,  $t_{\text{major}} = 18.24$  min,  $t_{\text{minor}} = 13.04$  min);  $[\alpha]_{\text{D}}^{26.7} = -20.0$  ( $c = 1.0$  in  $\text{CHCl}_3$ );  **$^1\text{H}$  NMR** (300 MHz,  $\text{CDCl}_3$ ):  $\delta$  8.19 (d,  $J = 7.8$  Hz, 1H), 7.78 – 7.61 (m, 2H), 7.58 – 7.45 (m, 1H), 7.09 (d,  $J = 10.4$  Hz, 1H), 6.64 (d,  $J = 10.3$  Hz, 1H), 3.74 (dd,  $J = 9.4, 4.9$  Hz, 2H), 3.42 (dt,  $J = 9.8, 4.6$  Hz, 1H), 3.31 – 3.11 (m, 1H), 2.29 (t,  $J = 5.8$  Hz, 1H), 2.13 (dd,  $J = 13.5, 5.8$  Hz, 1H), 1.82 (dd,  $J = 13.4, 7.2$  Hz, 1H), 0.53 – 0.30 (m, 2H), 0.26 – 0.10 (m, 1H), 0.07 – -0.06 (m, 1H), -0.33 (td,  $J = 9.8, 5.0$  Hz, 1H);  **$^{13}\text{C}$  NMR** (75 MHz,  $\text{CDCl}_3$ ):  $\delta$  184.52, 152.08, 144.31, 133.05,

132.20, 131.24, 128.12, 126.62, 126.11, 77.50, 77.46, 77.08, 76.65, 65.84, 62.13, 48.34, 5.78, 4.73, 4.53; **IR** (neat): 3445, 2923, 2853, 1667, 1599, 1456, 1377, 1299, 1084, 760  $\text{cm}^{-1}$ ; **HRMS** (ESI):  $\text{C}_{16}\text{H}_{18}\text{O}_3$   $[\text{M} + \text{Na}]^+$  calcd: 281.1148, found: 281.1159.

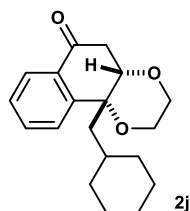

With 10 mol% catalyst at  $-20\text{ }^\circ\text{C}$  for 2 h.

White solid, m.p.  $70 - 71\text{ }^\circ\text{C}$ ; 50% yield; 91% ee determined by HPLC on Chiralpak IA-H column (*n*-hexane/*i*-PrOH = 4/6, flow rate = 1.0 mL/min,  $t_{\text{major}} = 7.15\text{min}$ ,  $t_{\text{minor}} = 10.48\text{min}$ );  $[\alpha]_{\text{D}}^{25.4} = 60.0$  ( $c = 1.0$  in  $\text{CHCl}_3$ );  $^1\text{H NMR}$  (300 MHz,  $\text{CDCl}_3$ ):  $\delta$  7.96 (d,  $J = 7.6$  Hz, 1H), 7.63 – 7.49 (m, 2H), 7.37 – 7.26 (m, 1H), 4.14 (t,  $J = 3.1$  Hz, 1H), 3.71 (td,  $J = 11.8, 3.5$  Hz, 1H), 3.60 – 3.44 (m, 3H), 2.83 (qd,  $J = 17.9, 3.1$  Hz, 2H), 1.72 – 1.47 (m, 9H), 1.14 – 0.98 (m, 2H), 0.94 – 0.79 (m, 2H);  $^{13}\text{C NMR}$  (75 MHz,  $\text{CDCl}_3$ ):  $\delta$  194.67, 144.69, 134.16, 131.83, 127.56, 126.97, 126.75, 77.45, 77.03, 76.61, 75.87, 66.91, 61.14, 48.77, 42.38, 35.34, 35.17, 33.11, 29.71, 26.42, 26.31, 26.15; **IR** (neat): 3372, 2923, 2852, 1693, 1601, 1450, 1287, 1111, 765, 592  $\text{cm}^{-1}$ ; **HRMS** (ESI):  $\text{C}_{19}\text{H}_{24}\text{O}_3$   $[\text{M} + \text{Na}]^+$  calcd: 323.1618, found: 323.1623.

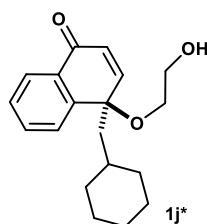

Yellow liquid; 49% yield; 92% ee determined by HPLC on Chiralpak IC-H column (*n*-hexane/*i*-PrOH = 7/3, flow rate = 1.0 mL/min,  $t_{\text{major}} = 23.10$  min,  $t_{\text{minor}} = 21.18$  min);  $[\alpha]_{\text{D}}^{28.2} = -30.0$  ( $c = 1.0$  in  $\text{CHCl}_3$ );  $^1\text{H NMR}$  (300 MHz,  $\text{CDCl}_3$ ):  $\delta$  8.13 (d,  $J = 7.8$  Hz, 1H), 7.62 (d,  $J = 3.8$  Hz, 2H), 7.46 (dq,  $J = 8.3, 4.2$  Hz, 1H), 6.93 (d,  $J = 10.3$  Hz, 1H), 6.57 (d,  $J = 10.3$  Hz, 1H), 3.65 (d,  $J = 4.5$  Hz, 2H), 3.30 (dt,  $J = 9.7, 4.8$  Hz, 1H), 3.17 – 2.97 (m, 1H), 2.16 (t,  $J = 5.2$  Hz, 1H), 1.94 (d,  $J = 4.9$  Hz, 2H), 1.70 – 1.54 (m, 2H), 1.45 (dd,  $J = 19.3, 9.9$  Hz, 2H), 1.13 – 0.89 (m, 6H), 0.65 (dd,  $J = 22.0, 11.2$  Hz, 1H);



$^{13}\text{C}$  NMR (75 MHz,  $\text{CDCl}_3$ ):  $\delta$  184.48, 151.74, 144.15, 133.14, 131.96, 131.19, 128.20, 126.66, 126.47, 77.49, 77.07, 76.74, 76.64, 65.46, 62.11, 50.47, 35.01, 34.37, 33.25, 26.05, 25.94; **IR** (neat): 3431, 2926, 2854, 1735, 1668, 1457, 1378, 1216, 1083, 758  $\text{cm}^{-1}$ ; **HRMS** (ESI):  $\text{C}_{19}\text{H}_{24}\text{O}_3$   $[\text{M} + \text{Na}]^+$  calcd: 323.1618, found: 323.1629.

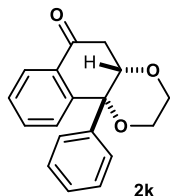

With 10 mol% catalyst at  $-20\text{ }^\circ\text{C}$  for 5 h.

White solid, m.p.  $69 - 70\text{ }^\circ\text{C}$ ; 51% yield; 90% ee determined by HPLC on Chiralpak IA-H column (*n*-hexane/*i*-PrOH = 4/6, flow rate = 1.0 mL/min,  $t_{\text{major}} = 7.57$  min,  $t_{\text{minor}} = 10.44$  min);  $[\alpha]_{\text{D}}^{27.4} = 74.0$  ( $c = 1.0$  in  $\text{CHCl}_3$ );  **$^1\text{H}$  NMR** (300 MHz,  $\text{CDCl}_3$ ):  $\delta$  8.24 – 8.08 (d, 1H), 7.78 – 7.64 (m, 1H), 7.60 – 7.48 (m, 2H), 7.37 – 7.27 (m, 3H), 7.19 (dd,  $J = 6.8, 3.0$  Hz, 2H), 4.21 (t,  $J = 3.1$  Hz, 1H), 3.99 (ddd,  $J = 12.1, 10.2, 5.4$  Hz, 1H), 3.84 – 3.67 (m, 3H), 2.67 (qd,  $J = 17.3, 3.1$  Hz, 2H);  **$^{13}\text{C}$  NMR** (75 MHz,  $\text{CDCl}_3$ ):  $\delta$  193.94, 141.42, 140.88, 133.74, 132.70, 127.36, 127.31, 127.25, 127.16, 126.51, 125.47, 79.20, 77.32, 76.43, 76.21, 76.00, 75.58, 65.95, 60.17, 40.83, 28.67; **IR** (neat): 3368, 2922, 2855, 1693, 1560, 1447, 1288, 1108, 759, 565  $\text{cm}^{-1}$ ; **HRMS** (ESI):  $\text{C}_{18}\text{H}_{16}\text{O}_3$   $[\text{M} + \text{Na}]^+$  calcd: 303.0992, found: 303.0999.

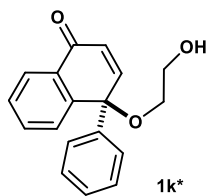

Yellow solid, m.p.  $109 - 110\text{ }^\circ\text{C}$ ; 46% yield; 99% ee determined by HPLC on Chiralpak IC-H column (*n*-hexane/*i*-PrOH = 8/2, flow rate = 1.0 mL/min,  $t_{\text{major}} = 15.22$  min,  $t_{\text{minor}} = 16.02$  min);  $[\alpha]_{\text{D}}^{28.5} = 41.1$  ( $c = 1.0$  in  $\text{CHCl}_3$ );  **$^1\text{H}$  NMR** (300 MHz,  $\text{CDCl}_3$ ):  $\delta$  8.18 (d,  $J = 7.6$  Hz, 1H), 7.54 (t,  $J = 6.9$  Hz, 1H), 7.45 (t,  $J = 7.1$  Hz, 1H), 7.40 – 7.21 (m, 6H), 6.89 (d,  $J = 10.2$  Hz, 1H), 6.53 (d,  $J = 10.2$  Hz, 1H), 3.79 (d,  $J = 4.5$  Hz, 2H), 3.57 (dt,  $J = 9.5, 4.7$  Hz, 1H), 3.35 – 3.21 (m, 1H), 2.06 (s, 1H);  **$^{13}\text{C}$  NMR** (75 MHz,  $\text{CDCl}_3$ ):  $\delta$  184.64, 151.06, 144.14, 141.83, 133.58, 131.76, 129.36, 128.56, 128.46, 128.36, 127.81, 126.51, 125.98, 77.52, 77.34, 77.10, 76.67, 65.78, 62.15; **IR** (neat): 3448, 2924,

2854, 1667, 1600, 1456, 1299, 1084, 768, 561  $\text{cm}^{-1}$ ; **HRMS** (ESI):  $\text{C}_{18}\text{H}_{16}\text{O}_3$   $[\text{M} + \text{Na}]^+$   
calcd: 303.0992, found: 303.0991.

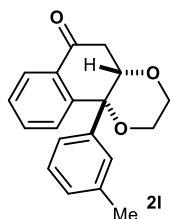

With 10 mol% catalyst at  $-10\text{ }^\circ\text{C}$  for 2 h.

Pale yellow solid, m.p.  $118 - 120\text{ }^\circ\text{C}$ ; 48% yield; 95% ee determined by HPLC on Chiralpak IA-H column (*n*-hexane/*i*-PrOH = 4/6, flow rate = 1.0 mL/min,  $t_{\text{major}} = 5.29$  min,  $t_{\text{minor}} = 7.09$  min);  $[\alpha]_{\text{D}}^{28.2} = 66.0$  ( $c = 1.0$  in  $\text{CHCl}_3$ );  **$^1\text{H NMR}$**  (300 MHz,  $\text{CDCl}_3$ ):  $\delta$  8.16 (d,  $J = 7.6$  Hz, 1H), 7.69 (t,  $J = 7.1$  Hz, 1H), 7.53 (dd,  $J = 14.6, 7.3$  Hz, 2H), 7.21 – 7.05 (m, 3H), 6.86 (d,  $J = 7.4$  Hz, 1H), 4.21 (t,  $J = 2.9$  Hz, 1H), 3.98 (m,  $J = 11.8, 10.0, 5.7$  Hz, 1H), 3.84 – 3.66 (m, 3H), 2.81 – 2.55 (m, 2H), 2.30 (s, 3H);  **$^{13}\text{C NMR}$**  (75 MHz,  $\text{CDCl}_3$ ):  $\delta$  195.13, 142.40, 142.00, 138.04, 134.78, 133.67, 129.16, 128.36, 128.20, 128.11, 128.02, 126.46, 124.80, 80.23, 78.36, 77.51, 77.09, 76.66, 66.96, 61.19, 41.92, 29.71, 21.58; **IR** (neat): 3369, 2923, 1733, 1697, 1601, 1454, 1286, 1110, 764, 568  $\text{cm}^{-1}$ ; **HRMS** (ESI):  $\text{C}_{19}\text{H}_{18}\text{O}_3$   $[\text{M} + \text{Na}]^+$  calcd: 317.1148, found: 317.1157.

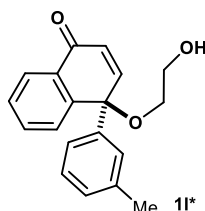

Green liquid; 49% yield; 95% ee determined by HPLC on Chiralpak IC-H column (*n*-hexane/*i*-PrOH = 8/2, flow rate = 1.0 mL/min,  $t_{\text{major}} = 14.63$  min,  $t_{\text{minor}} = 13.63$  min);  $[\alpha]_{\text{D}}^{28.1} = 67.0$  ( $c = 1.0$  in  $\text{CHCl}_3$ );  **$^1\text{H NMR}$**  (300 MHz,  $\text{CDCl}_3$ ):  $\delta$  8.17 (d,  $J = 7.7, 0.9$  Hz, 1H), 7.61 – 7.33 (m, 3H), 7.21 – 7.09 (m, 3H), 7.09 – 7.01 (m, 1H), 6.88 (d,  $J = 10.2$  Hz, 1H), 6.52 (d,  $J = 10.2$  Hz, 1H), 3.79 (t,  $J = 4.5$  Hz, 2H), 3.55 (m, 1H), 3.33 – 3.16 (m, 1H), 2.40 (s, 1H), 2.28 (s, 3H);  **$^{13}\text{C NMR}$**  (75 MHz,  $\text{CDCl}_3$ ):  $\delta$  184.76, 151.22, 144.25, 141.69, 138.28, 133.58, 131.72, 129.27, 128.62, 128.47, 128.42, 128.35, 126.51, 126.49, 123.08, 77.56, 77.33, 77.13, 76.71, 65.78, 62.14, 21.59; **IR** (neat): 3452,

2929, 1726, 1668, 1601, 1458, 1300, 1077, 843, 762  $\text{cm}^{-1}$ ; **HRMS** (ESI):  $\text{C}_{19}\text{H}_{18}\text{O}_3$  [ $\text{M} + \text{Na}$ ] $^+$  calcd: 317.1148, found: 317.1156.

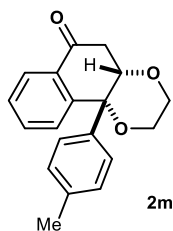

With 10 mol% catalyst at  $-20\text{ }^\circ\text{C}$  for 4 h.

Pale yellow solid, m.p.  $58 - 59\text{ }^\circ\text{C}$ ; 52% yield; 88% ee determined by HPLC on Chiralpak IA-H column (*n*-hexane/*i*-PrOH = 4/6, flow rate = 1.0 mL/min,  $t_{\text{major}} = 5.81$  min,  $t_{\text{minor}} = 7.92$  min);  $[\alpha]_{\text{D}}^{28.1} = 76.7$  ( $c = 1.0$  in  $\text{CHCl}_3$ );  **$^1\text{H NMR}$**  (300 MHz,  $\text{CDCl}_3$ ):  $\delta$  8.16 – 7.98 (d, 1H), 7.59 (t,  $J = 7.5$  Hz, 1H), 7.43 (dd,  $J = 16.1, 7.8$  Hz, 2H), 7.06 – 6.92 (m, 4H), 4.10 (t,  $J = 3.1$  Hz, 1H), 3.94 – 3.78 (m, 1H), 3.70 – 3.54 (m, 3H), 2.68 – 2.46 (m, 2H), 2.22 (s, 3H);  **$^{13}\text{C NMR}$**  (75 MHz,  $\text{CDCl}_3$ ):  $\delta$  195.11, 142.14, 139.57, 138.17, 134.77, 133.65, 128.96, 128.33, 128.20, 127.45, 126.44, 80.27, 78.19, 77.55, 77.33, 77.13, 76.70, 66.98, 61.21, 41.93, 21.06; **IR** (neat): 3370, 2924, 2854, 1732, 1689, 1611, 1457, 1294, 1115, 759  $\text{cm}^{-1}$ ; **HRMS** (ESI):  $\text{C}_{19}\text{H}_{18}\text{O}_3$  [ $\text{M} + \text{Na}$ ] $^+$  calcd: 317.1148, found: 317.1152.

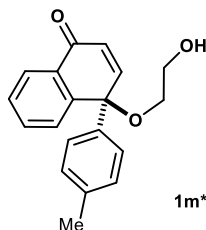

Yellow liquid; 46% yield; 99% ee determined by HPLC on Chiralpak IC-H column (*n*-hexane/*i*-PrOH = 8/2, flow rate = 1.0 mL/min,  $t_{\text{major}} = 93.20$  min,  $t_{\text{minor}} = 97.73$  min);  $[\alpha]_{\text{D}}^{26.2} = 93.0$  ( $c = 1.0$  in  $\text{CHCl}_3$ );  **$^1\text{H NMR}$**  (300 MHz,  $\text{CDCl}_3$ ):  $\delta$  8.17 (d,  $J = 7.8, 1.0$  Hz, 1H), 7.53 (t,  $J = 7.5, 1.4$  Hz, 1H), 7.42 (m,  $J = 16.9, 11.7, 4.5$  Hz, 2H), 7.28 – 7.17 (d, 2H), 7.09 (d,  $J = 8.1$  Hz, 2H), 6.88 (d,  $J = 10.2$  Hz, 1H), 6.50 (d,  $J = 10.2$  Hz, 1H), 3.78 (d,  $J = 2.6$  Hz, 2H), 3.55 (m,  $J = 9.6, 4.7$  Hz, 1H), 3.34 – 3.17 (m, 1H), 2.29 (s, 3H), 2.23 (s, 1H);  **$^{13}\text{C NMR}$**  (75 MHz,  $\text{CDCl}_3$ ):  $\delta$  184.66, 151.22, 144.25, 138.88, 137.64, 133.51, 131.74, 129.23, 129.12, 128.37, 128.27, 126.46, 125.87, 77.48, 77.27,

77.05, 76.63, 65.71, 62.15, 21.02; **IR** (neat): 3449, 2927, 2855, 1668, 1601, 1457, 1380, 1297, 1068, 761  $\text{cm}^{-1}$ ; **HRMS** (ESI):  $\text{C}_{19}\text{H}_{18}\text{O}_3$   $[\text{M} + \text{Na}]^+$  calcd: 317.1148, found: 317.1152.

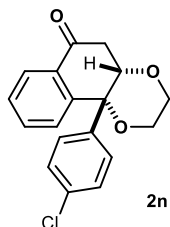

With 10 mol% catalyst at  $-20\text{ }^\circ\text{C}$  for 3 h.

White solid, m.p.  $53 - 54\text{ }^\circ\text{C}$ ; 52% yield; 89% ee determined by HPLC on Chiralpak IA-H column (*n*-hexane/*i*-PrOH = 4/6, flow rate = 1.0 mL/min,  $t_{\text{major}} = 5.66$  min,  $t_{\text{minor}} = 7.76$  min);  $[\alpha]_{\text{D}}^{28.4} = 75.0$  ( $c = 1.0$  in  $\text{CHCl}_3$ );  **$^1\text{H}$  NMR** (300 MHz,  $\text{CDCl}_3$ ):  $\delta$  8.15 – 7.95 (d, 1H), 7.67 – 7.55 (t, 1H), 7.43 (dd,  $J = 7.5, 5.7$  Hz, 2H), 7.16 (d,  $J = 8.7$  Hz, 2H), 7.05 (d,  $J = 8.7$  Hz, 2H), 4.05 (t,  $J = 3.1$  Hz, 1H), 3.86 (dt,  $J = 12.1, 8.3$  Hz, 1H), 3.64 (t,  $J = 9.0$  Hz, 3H), 2.57 (qd,  $J = 20.0, 17.3, 3.1$  Hz, 2H);  **$^{13}\text{C}$  NMR** (75 MHz,  $\text{CDCl}_3$ ):  $\delta$  193.54, 140.35, 139.99, 133.87, 133.19, 132.52, 127.95, 127.56, 127.35, 126.98, 125.53, 78.96, 76.80, 76.50, 76.27, 76.07, 75.65, 65.83, 60.10, 40.65; **IR** (neat): 3378, 2925, 2854, 1740, 1695, 1602, 1457, 1215, 1109, 759  $\text{cm}^{-1}$ ; **HRMS** (ESI):  $\text{C}_{18}\text{H}_{15}\text{ClO}_3$   $[\text{M} + \text{Na}]^+$  calcd: 337.0602, found: 337.0600.

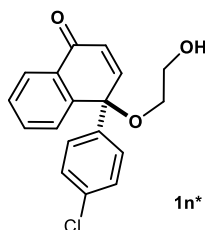

White solid, m.p.  $59 - 60\text{ }^\circ\text{C}$ ; 46% yield; 99% ee determined by HPLC on Chiralpak IC-H column (*n*-hexane/*i*-PrOH = 8/2, flow rate = 1.0 mL/min,  $t_{\text{major}} = 11.44$  min,  $t_{\text{minor}} = 12.42$  min);  $[\alpha]_{\text{D}}^{25.8} = 61.0$  ( $c = 1.0$  in  $\text{CHCl}_3$ );  **$^1\text{H}$  NMR** (300 MHz,  $\text{CDCl}_3$ ):  $\delta$  8.08 (d,  $J = 7.7$  Hz, 1H), 7.45 (t,  $J = 7.3$  Hz, 1H), 7.36 (t,  $J = 7.3$  Hz, 1H), 7.20 (dt,  $J = 19.5, 8.3$  Hz, 5H), 6.77 (d,  $J = 10.2$  Hz, 1H), 6.44 (d,  $J = 10.2$  Hz, 1H), 3.69 (d,  $J = 3.9$  Hz, 2H), 3.46 (dt,  $J = 9.5, 4.7$  Hz, 1H), 3.25 – 3.07 (m, 1H), 2.38 (s, 1H);  **$^{13}\text{C}$  NMR** (75 MHz,  $\text{CDCl}_3$ ):  $\delta$  183.37, 149.52, 142.62, 139.40, 132.66, 130.59, 128.55, 127.63, 127.18,

126.41, 125.57, 76.50, 76.07, 75.89, 75.65, 64.86, 60.99; **IR** (neat): 3458, 2924, 2853, 1742, 1668, 1601, 1457, 1215, 1083, 759  $\text{cm}^{-1}$ ; **HRMS** (ESI):  $\text{C}_{18}\text{H}_{15}\text{ClO}_3$   $[\text{M} + \text{Na}]^+$  calcd: 337.0602, found: 337.0608.

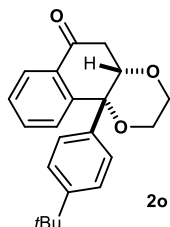

With 10 mol% catalyst at  $-15\text{ }^\circ\text{C}$  for 6 h.

White solid, m.p.  $68 - 69\text{ }^\circ\text{C}$ ; 45% yield; 92% ee determined by HPLC on Chiralpak IA-H column (*n*-hexane/*i*-PrOH = 4/6, flow rate = 1.0 mL/min,  $t_{\text{major}} = 5.02$  min,  $t_{\text{minor}} = 6.16$  min);  $[\alpha]_{\text{D}}^{27.7} = 72.0$  ( $c = 1.0$  in  $\text{CHCl}_3$ );  **$^1\text{H NMR}$**  (300 MHz,  $\text{CDCl}_3$ ):  $\delta$  8.15 (d,  $J = 7.8$  Hz, 1H), 7.68 (t,  $J = 10.9, 4.1$  Hz, 1H), 7.58 – 7.46 (m, 2H), 7.29 (t,  $J = 7.8$  Hz, 2H), 7.10 (d,  $J = 8.4$  Hz, 2H), 4.22 (t,  $J = 3.0$  Hz, 1H), 3.98 (td,  $J = 11.4, 4.7$  Hz, 1H), 3.85 – 3.64 (m, 3H), 2.78 – 2.56 (m, 2H), 1.27 (s, 9H);  **$^{13}\text{C NMR}$**  (75 MHz,  $\text{CDCl}_3$ ):  $\delta$  195.12, 151.32, 142.11, 139.39, 134.70, 133.64, 128.29, 128.22, 127.19, 126.45, 125.20, 80.22, 78.18, 77.46, 77.03, 76.61, 67.01, 61.21, 42.00, 34.51, 31.24, 29.72; **IR** (neat): 3380, 2923, 1746, 1695, 1601, 1457, 1286, 1110, 815, 765  $\text{cm}^{-1}$ ; **HRMS** (ESI):  $\text{C}_{22}\text{H}_{24}\text{O}_3$   $[\text{M} + \text{Na}]^+$  calcd: 359.1618, found: 359.1620.

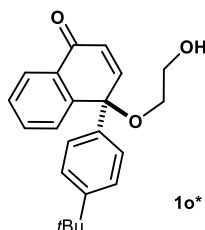

Green solid, m.p.  $59 - 60\text{ }^\circ\text{C}$ ; 48% yield; 98% ee determined by HPLC on Chiralpak OD-H column (*n*-hexane/*i*-PrOH = 8/2, flow rate = 1.0 mL/min,  $t_{\text{major}} = 18.66$  min,  $t_{\text{minor}} = 17.43$  min);  $[\alpha]_{\text{D}}^{25.0} = 79.0$  ( $c = 1.0$  in  $\text{CHCl}_3$ );  **$^1\text{H NMR}$**  (300 MHz,  $\text{CDCl}_3$ ):  $\delta$  8.18 (d,  $J = 7.8$  Hz, 1H), 7.54 (td,  $J = 7.6, 1.3$  Hz, 1H), 7.43 (dd,  $J = 17.7, 8.0$  Hz, 2H), 7.27 (q,  $J = 8.7$  Hz, 4H), 6.90 (d,  $J = 10.2$  Hz, 1H), 6.50 (d,  $J = 10.2$  Hz, 1H), 3.78 (m, 2H), 3.56 (m, 1H), 3.27 (m, 1H), 2.12 (s, 1H), 1.27 (s, 9H);  **$^{13}\text{C NMR}$**  (75 MHz,  $\text{CDCl}_3$ ):  $\delta$  184.66, 151.27, 150.85, 144.17, 138.77, 133.47, 131.82, 129.11, 128.39, 128.37, 126.48,

125.68, 125.49, 77.47, 77.32, 77.05, 76.63, 65.69, 62.19, 34.49, 31.26; **IR** (neat): 3455, 2928, 1726, 1668, 1601, 1456, 1380, 1300, 1084, 767  $\text{cm}^{-1}$ ; **HRMS** (ESI):  $\text{C}_{22}\text{H}_{24}\text{O}_3$   $[\text{M} + \text{Na}]^+$  calcd: 359.1618, found: 359.1623.

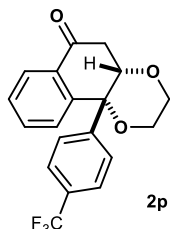

With 10 mol% catalyst at  $-10\text{ }^\circ\text{C}$  for 2 h.

Yellow liquid; 49% yield; 89% ee determined by HPLC on Chiralpak IA-H column (*n*-hexane/*i*-PrOH = 4/6, flow rate = 1.0 mL/min,  $t_{\text{major}} = 5.45$  min,  $t_{\text{minor}} = 7.03$  min);  $[\alpha]_{\text{D}}^{24.5} = 64.0$  ( $c = 1.0$  in  $\text{CHCl}_3$ );  **$^1\text{H}$  NMR** (300 MHz,  $\text{CDCl}_3$ ):  $\delta$  8.10 (dd,  $J = 7.8, 0.9$  Hz, 1H), 7.63 (td,  $J = 7.6, 1.3$  Hz, 1H), 7.55 – 7.41 (m, 4H), 7.27 (d,  $J = 8.3$  Hz, 2H), 4.08 (t,  $J = 3.1$  Hz, 1H), 3.97 – 3.82 (m, 1H), 3.69 (t,  $J = 9.0$  Hz, 3H), 2.82 – 2.42 (m, 2H);  **$^{13}\text{C}$  NMR** (75 MHz,  $\text{CDCl}_3$ ):  $\delta$  193.42, 145.33, 140.13, 133.99, 132.59, 129.46 (q,  $J_{\text{C-F}} = 32.25$ ), 127.75, 127.03, 126.97, 125.69, 124.62, 124.18 (q,  $J_{\text{C-F}} = 3.75$ ), 123.27, 121.02, 78.83, 76.98, 76.44, 76.02, 75.60, 65.87, 60.08, 40.62; **IR** (neat): 3376, 2924, 1742, 1697, 1601, 1455, 1326, 1111, 839, 761  $\text{cm}^{-1}$ ; **HRMS** (ESI):  $\text{C}_{19}\text{H}_{15}\text{F}_3\text{O}_3$   $[\text{M} + \text{Na}]^+$  calcd: 371.0866, found: 371.0869.

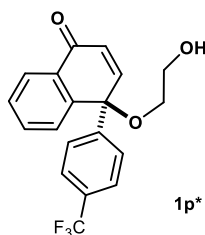

Yellow liquid; 45% yield; 99% ee determined by HPLC on Chiralpak OD-H column (*n*-hexane/*i*-PrOH = 9/1, flow rate = 1.0 mL/min,  $t_{\text{major}} = 21.38$  min,  $t_{\text{minor}} = 19.53$  min);  $[\alpha]_{\text{D}}^{27.9} = 27.0$  ( $c = 1.0$  in  $\text{CHCl}_3$ );  **$^1\text{H}$  NMR** (300 MHz,  $\text{CDCl}_3$ ):  $\delta$  8.20 (dd,  $J = 7.7, 1.1$  Hz, 1H), 7.66 – 7.43 (m, 6H), 7.33 (dd,  $J = 7.7, 0.8$  Hz, 1H), 6.87 (d,  $J = 10.2$  Hz, 1H), 6.58 (d,  $J = 10.2$  Hz, 1H), 3.82 (s, 2H), 3.59 (m, 1H), 3.38 – 3.20 (m, 1H), 2.36 (s, 1H);  **$^{13}\text{C}$  NMR** (75 MHz,  $\text{CDCl}_3$ ):  $\delta$  184.23, 149.92, 145.87, 143.30, 133.81, 131.68, 130.23, 130.08, 129.80, 128.85, 128.21, 126.74, 126.43, 126.36, 125.70, 125.53 (q,  $J_{\text{C-}}$

$F = 3.75$ ), 124.63 (t,  $J_{C-F} = 4.88$ ), 77.47, 77.25, 77.04, 76.62, 65.90, 62.08; **IR** (neat): 3372, 2924, 1733, 1698, 1601, 1454, 1326, 1169, 839, 765  $\text{cm}^{-1}$ ; **HRMS** (ESI):  $\text{C}_{19}\text{H}_{15}\text{F}_3\text{O}_3$   $[\text{M} + \text{Na}]^+$  calcd: 371.0866, found: 371.0884.

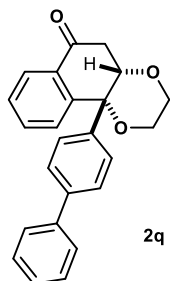

With 10 mol% catalyst at  $-10\text{ }^\circ\text{C}$  for 12 h.

White solid, m.p.  $208 - 209\text{ }^\circ\text{C}$ ; 50% yield; 92% ee determined by HPLC on Chiralpak IA-H column (*n*-hexane/*i*-PrOH = 4/6, flow rate = 1.0 mL/min,  $t_{\text{major}} = 6.98$  min,  $t_{\text{minor}} = 8.70$  min);  $[\alpha]_{\text{D}}^{28.5} = 82.0$  ( $c = 1.0$  in  $\text{CHCl}_3$ );  **$^1\text{H}$  NMR** (300 MHz,  $\text{CDCl}_3$ ):  $\delta$  8.18 (d,  $J = 7.4$  Hz, 1H), 7.71 (t,  $J = 7.0$  Hz, 1H), 7.64 – 7.49 (m, 6H), 7.41 (t,  $J = 16.5, 8.8$  Hz, 2H), 7.33(d, 1H), 7.27 (d,  $J = 7.5$  Hz, 2H), 4.25 (t,  $J = 3.0$  Hz, 1H), 4.08 – 3.94 (m, 1H), 3.89 – 3.71 (m, 3H), 2.87 – 2.58 (m, 2H);  **$^{13}\text{C}$  NMR** (75 MHz,  $\text{CDCl}_3$ ):  $\delta$  195.01, 141.90, 141.43, 141.25, 140.36, 134.87, 133.68, 128.84, 128.48, 128.20, 127.99, 127.57, 127.12, 127.00, 126.57, 80.20, 78.23, 77.47, 77.05, 76.63, 67.00, 61.23, 41.95; **IR** (neat): 3367, 2923, 1692, 1601, 1453, 1351, 1288, 1111, 1018, 762  $\text{cm}^{-1}$ ; **HRMS** (ESI):  $\text{C}_{24}\text{H}_{20}\text{O}_3$   $[\text{M} + \text{Na}]^+$  calcd: 379.1305, found: 379.1307.

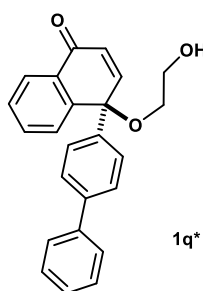

White solid, m.p.  $64 - 65\text{ }^\circ\text{C}$ ; 46% yield; 99% ee determined by HPLC on Chiralpak OD-H column (*n*-hexane/*i*-PrOH = 8/2, flow rate = 1.0 mL/min,  $t_{\text{major}} = 17.33$  min,  $t_{\text{minor}} = 22.58$  min);  $[\alpha]_{\text{D}}^{26.2} = 85.0$  ( $c = 1.0$  in  $\text{CHCl}_3$ );  **$^1\text{H}$  NMR** (300 MHz,  $\text{CDCl}_3$ ):  $\delta$  8.20 (d,  $J = 7.8$  Hz, 1H), 7.69 – 7.30 (m, 12H), 6.92 (d,  $J = 10.2$  Hz, 1H), 6.55 (d,  $J = 10.2$  Hz, 1H), 3.81 (t,  $J = 4.4$  Hz, 2H), 3.59 (m, 1H), 3.40 – 3.12 (m, 1H), 2.11 (s, 1H);  **$^{13}\text{C}$**

**NMR** (75 MHz, CDCl<sub>3</sub>):  $\delta$  184.60, 150.91, 144.02, 140.79, 140.78, 140.37, 133.64, 131.80, 129.44, 128.82, 128.56, 128.36, 127.52, 127.30, 127.08, 126.59, 126.45, 77.49, 77.31, 77.07, 76.64, 65.80, 62.20; **IR** (neat): 3458, 2925, 1725, 1601, 1455, 1381, 1298, 1076, 761, 701 cm<sup>-1</sup>; **HRMS** (ESI): C<sub>24</sub>H<sub>20</sub>O<sub>3</sub> [M + Na]<sup>+</sup> calcd: 379.1305, found: 379.1322.

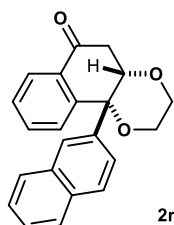

With 10 mol% catalyst at -20 °C for 5 h.

White solid, m.p. 114 – 115 °C; 47% yield; 91% ee determined by HPLC on Chiralpak IA-H column (*n*-hexane/*i*-PrOH = 4/6, flow rate = 1.0 mL/min,  $t_{\text{major}}$  = 6.39 min,  $t_{\text{minor}}$  = 8.47 min);  $[\alpha]_{\text{D}}^{27.4}$  = 90.0 (c = 1.0 in CHCl<sub>3</sub>); **<sup>1</sup>H NMR** (300 MHz, CDCl<sub>3</sub>):  $\delta$  8.22 (d,  $J$  = 7.8 Hz, 1H), 7.81 (d,  $J$  = 8.7 Hz, 2H), 7.75 – 7.64 (m, 2H), 7.64 – 7.55 (m, 2H), 7.55 – 7.42 (m, 4H), 4.32 (t,  $J$  = 3.0 Hz, 1H), 4.13 – 3.96 (m, 1H), 3.86 – 3.69 (m, 3H), 2.84 – 2.56 (m, 2H); **<sup>13</sup>C NMR** (75 MHz, CDCl<sub>3</sub>):  $\delta$  195.11, 141.94, 139.87, 134.92, 133.76, 133.02, 132.72, 128.55, 128.37, 128.31, 128.11, 127.51, 127.25, 126.62, 126.58, 126.38, 124.92, 80.03, 78.49, 77.48, 77.06, 76.64, 67.02, 61.28, 41.93; **IR** (neat): 3367, 2924, 2855, 1691, 1601, 1454, 1287, 1112, 759, 665 cm<sup>-1</sup>; **HRMS** (ESI): C<sub>22</sub>H<sub>18</sub>O<sub>3</sub> [M + Na]<sup>+</sup> calcd: 353.1148, found: 353.1152.

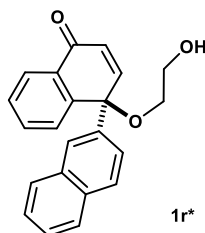

White solid, m.p. 65 – 66 °C; 51% yield; 88% ee determined by HPLC on Chiralpak IC-H column (*n*-hexane/*i*-PrOH = 8/2, flow rate = 1.0 mL/min,  $t_{\text{major}}$  = 11.67 min,  $t_{\text{minor}}$  = 12.56 min);  $[\alpha]_{\text{D}}^{25.2}$  = 64.0 (c = 1.0 in CHCl<sub>3</sub>); **<sup>1</sup>H NMR** (300 MHz, CDCl<sub>3</sub>):  $\delta$  8.22 (d,  $J$  = 7.6, 1.3 Hz, 1H), 8.02 (s, 1H), 7.88 – 7.72 (m, 2H), 7.70 (d,  $J$  = 8.7 Hz, 1H), 7.55 – 7.41 (m, 4H), 7.38 (dd,  $J$  = 7.6, 1.1 Hz, 1H), 7.22 (dd,  $J$  = 8.7, 1.8 Hz, 1H), 6.93 (d,  $J$  =



10.2 Hz, 1H), 6.58 (d,  $J = 10.2$  Hz, 1H), 3.84 (t,  $J = 4.6$  Hz, 2H), 3.62 (dt,  $J = 9.6, 4.7$  Hz, 1H), 3.42 – 3.24 (m, 1H), 2.28 (s, 1H);  $^{13}\text{C NMR}$  (75 MHz,  $\text{CDCl}_3$ ):  $\delta$  184.69, 150.80, 144.05, 138.93, 133.65, 133.20, 132.70, 132.72, 131.82, 129.68, 128.57, 128.46, 128.33, 128.23, 127.62, 126.59, 126.45, 124.69, 123.96, 77.51, 77.46, 77.09, 76.66, 65.90, 62.21; **IR** (neat): 3444, 2925, 2856, 1667, 1600, 1456, 1300, 1067, 763, 539  $\text{cm}^{-1}$ ; **HRMS** (ESI):  $\text{C}_{22}\text{H}_{18}\text{O}_3$   $[\text{M} + \text{Na}]^+$  calcd: 353.1148, found: 353.1154.

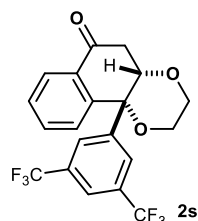

With 10 mol% catalyst at  $-10$  °C for 2 h.

White solid, m.p.  $84 - 85$  °C; 51% yield; 89% ee determined by HPLC on Chiralpak IA-H column ( $n$ -hexane/ $i$ -PrOH = 4/6, flow rate = 1.0 mL/min,  $t_{\text{major}} = 4.64$  min,  $t_{\text{minor}} = 5.80$  min);  $[\alpha]_{\text{D}}^{26.6} = 37.0$  ( $c = 1.0$  in  $\text{CHCl}_3$ );  $^1\text{H NMR}$  (300 MHz,  $\text{CDCl}_3$ ):  $\delta$  8.13 (d,  $J = 7.8$  Hz, 1H), 7.76 (s, 1H), 7.66 (t,  $J = 7.6, 1.2$  Hz, 1H), 7.59 (s, 2H), 7.51 (t,  $J = 10.9, 4.2$  Hz, 1H), 7.42 (d,  $J = 7.8$  Hz, 1H), 4.06 (t,  $J = 3.0$  Hz, 1H), 3.94 (td,  $J = 11.1, 4.2$  Hz, 1H), 3.78 – 3.60 (m, 3H), 2.72 (dd,  $J = 17.3, 3.6$  Hz, 1H), 2.48 (dd,  $J = 17.3, 2.6$  Hz, 1H);  $^{13}\text{C NMR}$  (75 MHz,  $\text{CDCl}_3$ ):  $\delta$  193.89, 145.40, 140.11, 135.36, 133.57, 131.74 (q,  $J_{\text{C-F}} = 33.25$ ), 129.34, 128.48, 127.88, 127.80, 127.76, 127.05, 124.87, 122.47 (t,  $J_{\text{C-F}} = 3.75$ ), 121.25, 79.69, 77.70, 77.47, 77.25, 77.04, 76.62, 66.83, 61.14, 41.48; **IR** (neat): 3367, 2925, 2854, 1742, 1693, 1601, 1454, 1287, 1113, 760  $\text{cm}^{-1}$ ; **HRMS** (ESI):  $\text{C}_{20}\text{H}_{14}\text{F}_6\text{O}_3$   $[\text{M} + \text{Na}]^+$  calcd: 439.0739, found: 439.0753.

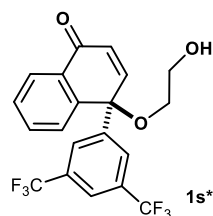

Green solid, m.p.  $105 - 106$  °C; 48% yield; 99% ee determined by HPLC on Chiralpak OD-H column ( $n$ -hexane/ $i$ -PrOH = 8/2, flow rate = 1.0 mL/min,  $t_{\text{major}} = 6.42$  min,  $t_{\text{minor}} = 5.61$  min);  $[\alpha]_{\text{D}}^{26.9} = 6.0$  ( $c = 1.0$  in  $\text{CHCl}_3$ );  $^1\text{H NMR}$  (300 MHz,  $\text{CDCl}_3$ ):  $\delta$  8.23 (d,

$J = 7.7, 1.2$  Hz, 1H), 7.80 (d,  $J = 5.2$  Hz, 3H), 7.64 – 7.50 (m, 2H), 7.34 – 7.27 (s, 1H), 6.84 (d,  $J = 10.2$  Hz, 1H), 6.65 (d,  $J = 10.2$  Hz, 1H), 3.83 (t,  $J = 4.5$  Hz, 2H), 3.60 (dt,  $J = 9.6, 4.7$  Hz, 1H), 3.43 – 3.20 (m, 1H), 2.02 (s,  $J = 18.3$  Hz, 1H);  $^{13}\text{C}$  NMR (75 MHz,  $\text{CDCl}_3$ ):  $\delta$  183.86, 148.88, 145.03, 142.33, 134.13, 132.22(t,  $J_{\text{C-F}} = 33.38$ ), 131.64, 131.33, 130.85, 129.33, 128.50, 128.17, 127.07, 126.30(d,  $J_{\text{C-F}} = 2.25$ ), 124.89, 122.02(q,  $J_{\text{C-F}} = 3.75$ ), 121.27, 77.49, 77.07, 76.64, 66.17, 61.91; **IR** (neat): 3445, 2924, 2855, 1667, 1600, 1456, 1299, 1090, 763, 538  $\text{cm}^{-1}$ ; **HRMS** (ESI):  $\text{C}_{20}\text{H}_{14}\text{F}_6\text{O}_3$  [ $\text{M} + \text{Na}$ ] $^+$  calcd: 439.0739, found: 439.0744.

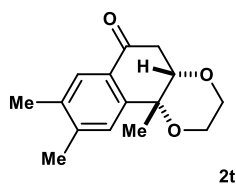

With 10 mol% catalyst at  $-10$  °C for 10 h.

Purple liquid; 53% yield; 87% ee determined by HPLC on Chiralpak IA-H column (*n*-hexane/*i*-PrOH = 4/6, flow rate = 1.0 mL/min,  $t_{\text{major}} = 5.55$  min,  $t_{\text{minor}} = 7.86$  min);  $[\alpha]_{\text{D}}^{27.6} = 2.9$  ( $c = 1.0$  in  $\text{CHCl}_3$ );  $^1\text{H}$  NMR (300 MHz,  $\text{CDCl}_3$ ):  $\delta$  7.80 (s, 1H), 7.36 (s, 1H), 4.02 (t,  $J = 3.1$  Hz, 1H), 3.77 (td,  $J = 11.5, 3.2$  Hz, 1H), 3.70 – 3.46 (m, 3H), 3.03 – 2.71 (m, 2H), 2.36 (s, 3H), 2.31 (s, 3H), 1.50 (s, 3H);  $^{13}\text{C}$  NMR (75 MHz,  $\text{CDCl}_3$ ):  $\delta$  194.49, 144.51, 141.98, 136.51, 129.77, 127.65, 127.07, 79.36, 77.47, 77.04, 76.62, 72.91, 66.79, 61.38, 42.62, 28.33, 20.48, 19.39; **IR** (neat): 3326, 2916, 2860, 1677, 1450, 1381, 1271, 1122, 1022, 757  $\text{cm}^{-1}$ ; **HRMS** (ESI):  $\text{C}_{15}\text{H}_{18}\text{O}_3$  [ $\text{M} + \text{Na}$ ] $^+$  calcd: 269.1148, found: 269.1150.

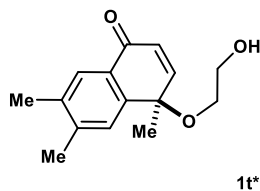

Purple solid, m.p.  $135 - 136$  °C; 47% yield; 95% ee determined by HPLC on Chiralpak OD-H column (*n*-hexane/*i*-PrOH = 8/2, flow rate = 1.0 mL/min,  $t_{\text{major}} = 7.67$  min,  $t_{\text{minor}} = 6.85$  min);  $[\alpha]_{\text{D}}^{28.0} = -79.0$  ( $c = 1.0$  in  $\text{CHCl}_3$ );  $^1\text{H}$  NMR (300 MHz,  $\text{CDCl}_3$ ):  $\delta$  7.88 (s, 1H), 7.39 (s, 1H), 6.90 (d,  $J = 10.3$  Hz, 1H), 6.45 (d,  $J = 10.3$  Hz, 1H), 3.81 – 3.54 (t, 2H), 3.29 (m,  $J = 9.8, 4.7$  Hz, 1H), 3.19 – 3.05 (m, 1H), 2.37 (s, 3H), 2.33 (s, 3H),

2.28 (s, 1H), 1.61 (s, 3H);  $^{13}\text{C}$  NMR (75 MHz,  $\text{CDCl}_3$ ):  $\delta$  184.41, 152.06, 143.22, 142.36, 137.11, 130.26, 129.13, 127.42, 127.10, 77.51, 77.09, 76.66, 73.37, 66.06, 62.12, 30.34, 20.42, 19.49; IR (neat): 3459, 2924, 2854, 1733, 1670, 1601, 1457, 1299, 1085, 765  $\text{cm}^{-1}$ ; HRMS (ESI):  $\text{C}_{15}\text{H}_{18}\text{O}_3$   $[\text{M} + \text{Na}]^+$  calcd: 269.1148, found: 269.1154.

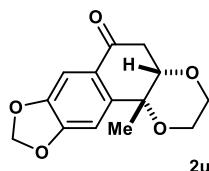

With 10 mol% catalyst at room temperature for 0.5 h.

Yellow solid, m.p. 119 – 120  $^{\circ}\text{C}$ ; 52% yield; 86.5% ee determined by HPLC on Chiralpak IA-H column (*n*-hexane/*i*-PrOH = 4/6, flow rate = 1.0 mL/min,  $t_{\text{major}} = 7.97$  min,  $t_{\text{minor}} = 13.35$  min);  $[\alpha]_{\text{D}}^{28.4} = 54.0$  ( $c = 1.0$  in  $\text{CHCl}_3$ );  $^1\text{H}$  NMR (300 MHz,  $\text{CDCl}_3$ ):  $\delta$  7.45 (s, 1H), 7.03 (s, 1H), 6.05 (dd,  $J = 4.0, 1.1$  Hz, 2H), 4.00 (t,  $J = 3.1$  Hz, 1H), 3.77 (td,  $J = 11.3, 3.5$  Hz, 1H), 3.69 – 3.50 (m, 3H), 2.96 – 2.75 (m, 2H), 1.49 (s, 3H);  $^{13}\text{C}$  NMR (75 MHz,  $\text{CDCl}_3$ ):  $\delta$  192.58, 153.25, 147.70, 141.60, 126.98, 106.02, 105.53, 101.84, 79.01, 77.49, 77.07, 76.64, 73.13, 66.66, 61.40, 42.24, 28.21; IR (neat): 3405, 2924, 2854, 1733, 1678, 1617, 1478, 1288, 1119, 760  $\text{cm}^{-1}$ ; HRMS (ESI):  $\text{C}_{14}\text{H}_{14}\text{O}_5$   $[\text{M} + \text{Na}]^+$  calcd: 285.0733, found: 285.0747.

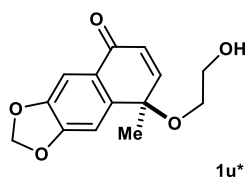

Pink solid, m.p. 134 – 135  $^{\circ}\text{C}$ ; 48% yield; 93% ee determined by HPLC on Chiralpak OD-H column (*n*-hexane/*i*-PrOH = 8/2, flow rate = 1.0 mL/min,  $t_{\text{major}} = 12.58$  min,  $t_{\text{minor}} = 11.06$  min);  $[\alpha]_{\text{D}}^{25.6} = -73.0$  ( $c = 1.0$  in  $\text{CHCl}_3$ );  $^1\text{H}$  NMR (300 MHz,  $\text{CDCl}_3$ ):  $\delta$  7.51 (s, 1H), 7.08 (s, 1H), 6.92 (d,  $J = 10.2$  Hz, 1H), 6.44 (d,  $J = 10.2$  Hz, 1H), 6.07 (s, 2H), 3.69 (d,  $J = 3.6$  Hz, 2H), 3.32 (dt,  $J = 9.7, 4.7$  Hz, 1H), 3.21 – 3.07 (m, 1H), 2.62 (s, 1H), 1.59 (s, 3H);  $^{13}\text{C}$  NMR (75 MHz,  $\text{CDCl}_3$ ):  $\delta$  182.97, 152.39, 151.81, 148.06, 141.97, 129.83, 126.49, 105.61, 105.56, 101.89, 77.56, 77.14, 76.71, 73.82, 66.23, 61.98, 30.38; IR (neat): 3455, 2926, 1726, 1669, 1600, 1456, 1326, 1127, 1069, 763  $\text{cm}^{-1}$ ; HRMS (ESI):  $\text{C}_{14}\text{H}_{14}\text{O}_5$   $[\text{M} + \text{Na}]^+$  calcd: 285.0733, found: 285.0739.

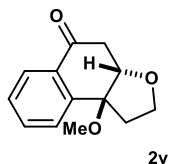

With 10 mol% catalyst at room temperature for 2 h.

Yellow oil liquid; 50% yield; 75% ee determined by HPLC on Chiralpak IA-H column (*n*-hexane/*i*-PrOH = 4/6, flow rate = 1.0 mL/min,  $t_{\text{major}} = 6.88$  min,  $t_{\text{minor}} = 7.39$  min);  $[\alpha]_{\text{D}}^{26.3} = 47.0$  ( $c = 1.0$  in  $\text{CHCl}_3$ );  **$^1\text{H NMR}$**  (300 MHz,  $\text{CDCl}_3$ ):  $\delta$  7.88 (d,  $J = 7.6$  Hz, 1H), 7.69 – 7.52 (m, 2H), 7.43 – 7.33 (m, 1H), 4.55 (m, 1H), 4.02 (dd,  $J = 16.0, 8.2$  Hz, 1H), 3.89 (td,  $J = 8.4, 4.3$  Hz, 1H), 3.03 (s, 3H), 2.97 – 2.84 (dd, 1H), 2.74 (dd,  $J = 16.1, 7.9$  Hz, 1H), 2.42 (m, 1H), 2.33 – 2.17 (m, 1H);  **$^{13}\text{C NMR}$**  (75 MHz,  $\text{CDCl}_3$ ):  $\delta$  195.74, 141.54, 134.60, 132.55, 128.34, 127.88, 126.41, 83.70, 77.52, 77.25, 77.10, 76.67, 66.60, 51.94, 43.69, 41.31; **IR** (neat): 3369, 2931, 1695, 1600, 1453, 1293, 1077, 768, 609, 568  $\text{cm}^{-1}$ ; **HRMS** (ESI):  $\text{C}_{13}\text{H}_{14}\text{O}_3$   $[\text{M} + \text{Na}]^+$  calcd: 241.0835, found: 241.0843.

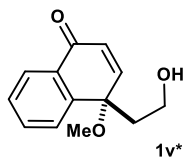

Purple oil liquid; 48% yield; 91% ee determined by HPLC on Chiralpak IC-H column (*n*-hexane/*i*-PrOH = 7/3, flow rate = 1.0 mL/min,  $t_{\text{major}} = 11.70$  min,  $t_{\text{minor}} = 14.85$  min);  $[\alpha]_{\text{D}}^{26.3} = 50.0$  ( $c = 1.0$  in  $\text{CHCl}_3$ );  **$^1\text{H NMR}$**  (300 MHz,  $\text{CDCl}_3$ ):  $\delta$  8.14 (d,  $J = 7.9$  Hz, 1H), 7.75 – 7.64 (m, 2H), 7.48 (m, 1H), 7.11 (d,  $J = 10.4$  Hz, 1H), 6.57 (d,  $J = 10.4$  Hz, 1H), 3.79 – 3.65 (m, 1H), 3.58 (m, 1H), 3.05 (s, 3H), 2.59 (s, 1H), 2.29 (m, 1H), 2.13 – 2.04 (m, 1H);  **$^{13}\text{C NMR}$**  (75 MHz,  $\text{CDCl}_3$ ):  $\delta$  184.07, 151.07, 143.48, 133.34, 131.65, 131.37, 128.43, 126.91, 126.31, 77.50, 77.27, 77.07, 76.87, 76.65, 58.95, 52.54, 45.77; **IR** (neat): 3444, 2931, 1667, 1660, 1456, 1381, 1300, 1084, 843, 766  $\text{cm}^{-1}$ ; **HRMS** (ESI):  $\text{C}_{13}\text{H}_{14}\text{O}_3$   $[\text{M} + \text{Na}]^+$  calcd: 241.0835, found: 241.0842.

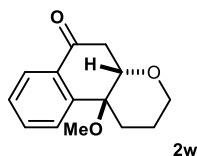

With 10 mol% catalyst at room temperature for 24 h.

White solid, m.p. 64 – 66 °C; 47% yield; 92% ee determined by HPLC on Chiralpak IA-

H column (*n*-hexane/*i*-PrOH = 6/4, flow rate = 1.0 mL/min,  $t_{\text{major}} = 5.24$  min,  $t_{\text{minor}} = 6.31$  min);  $[\alpha]_{\text{D}}^{26.3} = 6.0$  ( $c = 1.0$  in  $\text{CHCl}_3$ );  **$^1\text{H NMR}$**  (300 MHz,  $\text{CDCl}_3$ ):  $\delta$  8.15 (d,  $J = 8.0$ , 1.3 Hz, 1H), 7.68 – 7.58 (m, 1H), 7.47 (m, 2H), 4.01 (t,  $J = 3.6$  Hz, 1H), 3.84 (ddd,  $J = 6.7$ , 3.8, 2.5 Hz, 1H), 3.54 (td,  $J = 11.5$ , 2.7 Hz, 1H), 3.29 (dd,  $J = 17.4$ , 3.6 Hz, 1H), 3.10 (s, 3H), 2.90 (dd,  $J = 13.6$ , 4.2 Hz, 1H), 2.77 (dd,  $J = 17.4$ , 3.6 Hz, 1H), 1.83 – 1.62 (m, 2H), 1.51 (m, 1H);  **$^{13}\text{C NMR}$**  (75 MHz,  $\text{CDCl}_3$ ):  $\delta$  196.14, 138.81, 133.14, 132.76, 128.59, 128.00, 127.44, 79.37, 77.46, 77.04, 76.62, 72.58, 67.64, 49.58, 40.23, 30.04, 23.33; **IR** (neat): 3362, 2952, 1693, 1599, 1453, 1364, 1282, 1084, 943, 767  $\text{cm}^{-1}$ ; **HRMS** (ESI):  $\text{C}_{14}\text{H}_{16}\text{O}_3$   $[\text{M} + \text{Na}]^+$  calcd: 255.0992, found: 255.1000.

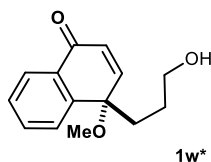

Purple oil liquid; 49% yield; 91% ee determined by HPLC on Chiralpak IC-H column (*n*-hexane/*i*-PrOH = 7/3, flow rate = 1.0 mL/min,  $t_{\text{major}} = 10.99$  min,  $t_{\text{minor}} = 14.49$  min);  $[\alpha]_{\text{D}}^{26.3} = 28.0$  ( $c = 1.0$  in  $\text{CHCl}_3$ );  **$^1\text{H NMR}$**  (300 MHz,  $\text{CDCl}_3$ ):  $\delta$  8.13 (d,  $J = 7.7$  Hz, 1H), 7.71 – 7.59 (m, 2H), 7.52 – 7.42 (m, 1H), 6.92 (d,  $J = 10.4$  Hz, 1H), 6.59 (d,  $J = 10.4$  Hz, 1H), 3.51 (t,  $J = 6.3$  Hz, 2H), 3.05 (s, 3H), 2.11 – 1.95 (m, 2H), 1.69 (s, 1H), 1.54 – 1.37 (m, 1H), 1.19 – 1.00 (m, 1H);  **$^{13}\text{C NMR}$**  (75 MHz,  $\text{CDCl}_3$ ):  $^{13}\text{C NMR}$  (75 MHz,  $\text{CDCl}_3$ )  $\delta$  184.39, 151.53, 143.65, 133.31, 132.26, 131.89, 128.22, 126.75, 126.04, 77.46, 77.24, 77.04, 76.61, 62.44, 52.63, 39.63, 27.09; **IR** (neat): 3424, 2929, 1667, 1600, 1456, 1379, 1299, 1086, 842, 767  $\text{cm}^{-1}$ ; **HRMS** (ESI):  $\text{C}_{14}\text{H}_{16}\text{O}_3$   $[\text{M} + \text{Na}]^+$  calcd: 255.0992, found: 255.1002.

### Nonlinear effects studies

Methods: To a stirred solution of **L10** (11.36 mg, 0.02 mmol) with different *ee* value from different ratio of (*R*)-**L10** and (*S*)-**L10** in toluene (0.5 mL), was added  $\text{Et}_2\text{Zn}$  (20  $\mu\text{L}$ , 1.0 M in toluene, 0.02 mmol) under an argon atmosphere. The mixture was then stirred at room temperature for 30 min to generate the catalyst. **1a** (0.2 mmol) in toluene (0.5 mL) was quickly added to the flask containing the in situ generated zinc catalyst.

After the addition, the reaction was stirred at  $-20\text{ }^{\circ}\text{C}$  for 2 hours. The reaction was quenched with saturated  $\text{NH}_4\text{Cl}$  and extracted with  $\text{CH}_2\text{Cl}_2$ . The organic layer was dried over  $\text{Na}_2\text{SO}_4$  and concentrated under vacuum. Then the residue was purified by column chromatography to afford the resolution product **1a\*** and **2a**. The ee value determination was carried out using chiral HPLC on Waters with a 2996UV-detector.

| ee (L10) | yield (2a) |
|----------|------------|
| 0        | 48         |
| 20       | 45.5       |
| 40       | 47         |
| 50       | 48         |
| 60       | 46         |
| 80       | 49         |
| 90       | 51         |
| 100      | 49.5       |

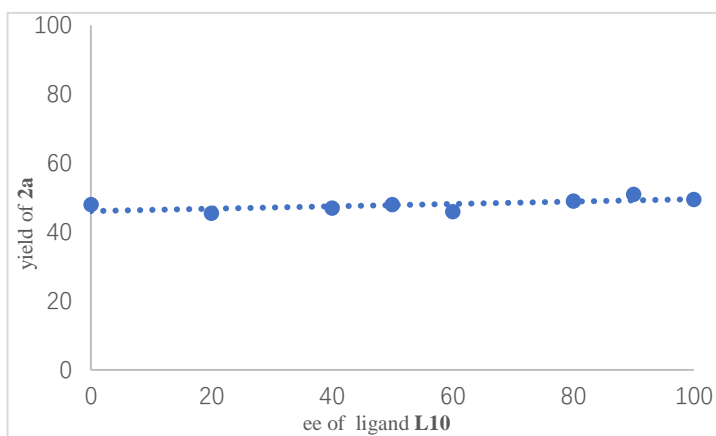

| ee (L10) | ee (2a) |
|----------|---------|
| 0        | 0       |
| 20       | 17.5    |
| 40       | 39      |
| 50       | 48.9    |
| 60       | 61.5    |
| 80       | 80.8    |
| 90       | 91.5    |
| 100      | 95      |

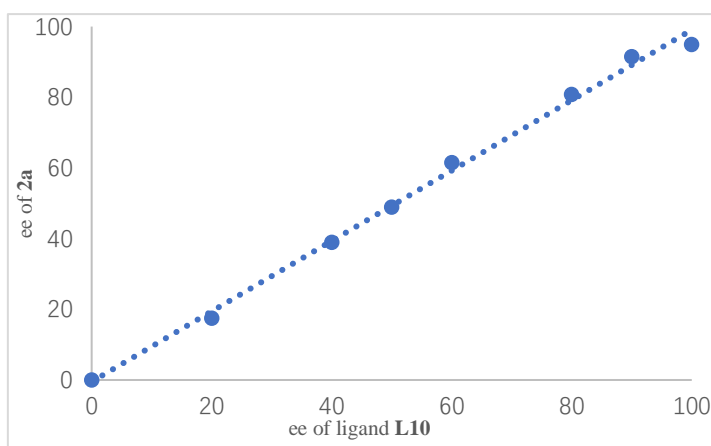

Figure S1. Nonlinear effects studies of the kinetic resolution reaction

### Control experiments

i) Methods: To a stirred solution of **L11** (4.66 mg, 0.01 mmol) in toluene (0.5 mL) was added  $\text{Et}_2\text{Zn}$  (10  $\mu\text{L}$ , 1.0 M in toluene, 0.01 mmol) under an argon atmosphere, the mixture was then stirred at room temperature for 30 min to generate the catalyst. **1a**

(0.1 mmol) in toluene (0.5 mL) was quickly added to the flask containing the in situ generated catalyst. After the addition, the reaction was stirred at -20 °C for each identified time. The reaction was quenched with saturated NH<sub>4</sub>Cl and extracted with CH<sub>2</sub>Cl<sub>2</sub>. The organic layer was dried over Na<sub>2</sub>SO<sub>4</sub> and concentrated under vacuum for <sup>1</sup>H NMR studies to confirm the conversions.

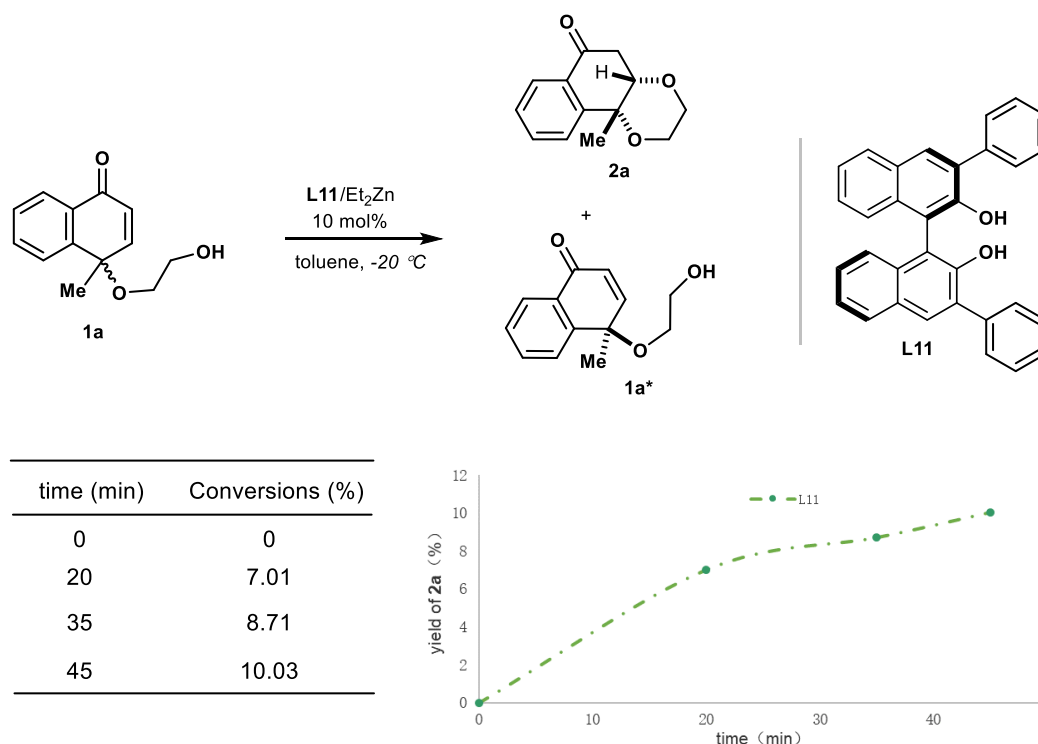

Figure S2. Control experiment using **L11** as catalyst

Methods: To a stirred solution of **L10** (5.68 mg, 0.01 mmol) in toluene (0.5 mL) was added Et<sub>2</sub>Zn (10 μL, 1.0 M in toluene, 0.01 mmol) under an argon atmosphere, the mixture was then stirred at room temperature for 30 min to generate the catalyst. **1a** (0.1 mmol) in toluene (0.5 mL) was quickly added to the flask containing the in situ generated catalyst. After the addition, the reaction was stirred at -20 °C for each identified time. The mixture was quenched with saturated NH<sub>4</sub>Cl and extracted with CH<sub>2</sub>Cl<sub>2</sub>. The organic layer was dried over Na<sub>2</sub>SO<sub>4</sub> and concentrated under vacuum for <sup>1</sup>H NMR studies to confirm the conversions.

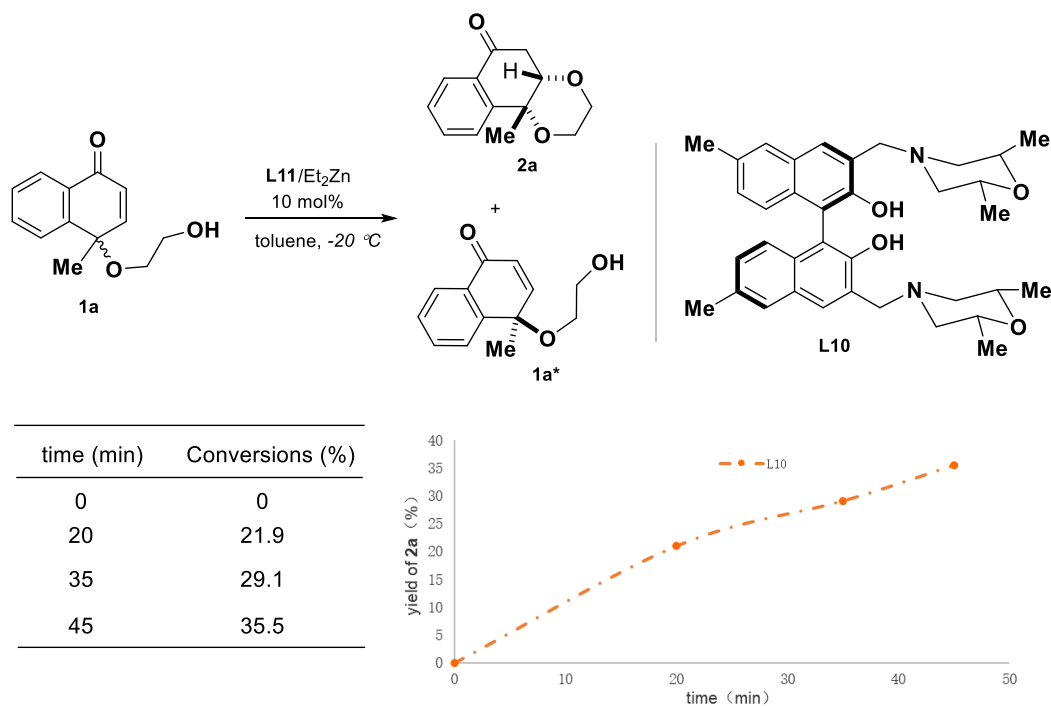

Figure S3. Control experiment using **L10** as catalyst

### NMR investigation of the additive's effects

As the introduction of Boc-NH<sub>2</sub> into the KR reaction could slightly improve the enantioselectivities of products, control experiment of NMR analysis was carried out to study the role of this additive. In the dried flask, chiral ligand **L10** (10 mol%, 0.1 mmol) in deuterated benzene (0.5 mL) was added Et<sub>2</sub>Zn (100 μL, 1.0 M in toluene, 0.1 mmol) under an argon atmosphere, respectively. The mixtures were stirred at room temperature for 30 min. Then was added 0.4 mmol Boc-NH<sub>2</sub> before the NMR analysis. As show in Figure S4, the introduction of the Boc-NH<sub>2</sub> additive to the **L10**-Zn complex results in an obvious shift of the <sup>1</sup>H NMR peaks. It was observed that the <sup>1</sup>H NMR signals of the amide hydrogens in Boc-NH<sub>2</sub> became to two distinct peaks after introduction to the zinc catalyst, we proposed that Boc-NH<sub>2</sub> might play a stabilizing effect to the catalyst via hydrogen bonding with the amine group in the chiral ligand, as well as the coordination of amide group to the zinc centre (Figure S4), thus made the amide bond fixed to show distinct <sup>1</sup>H NMR signals.



a)  $^1\text{H}$  NMR of Boc-NH $_2$

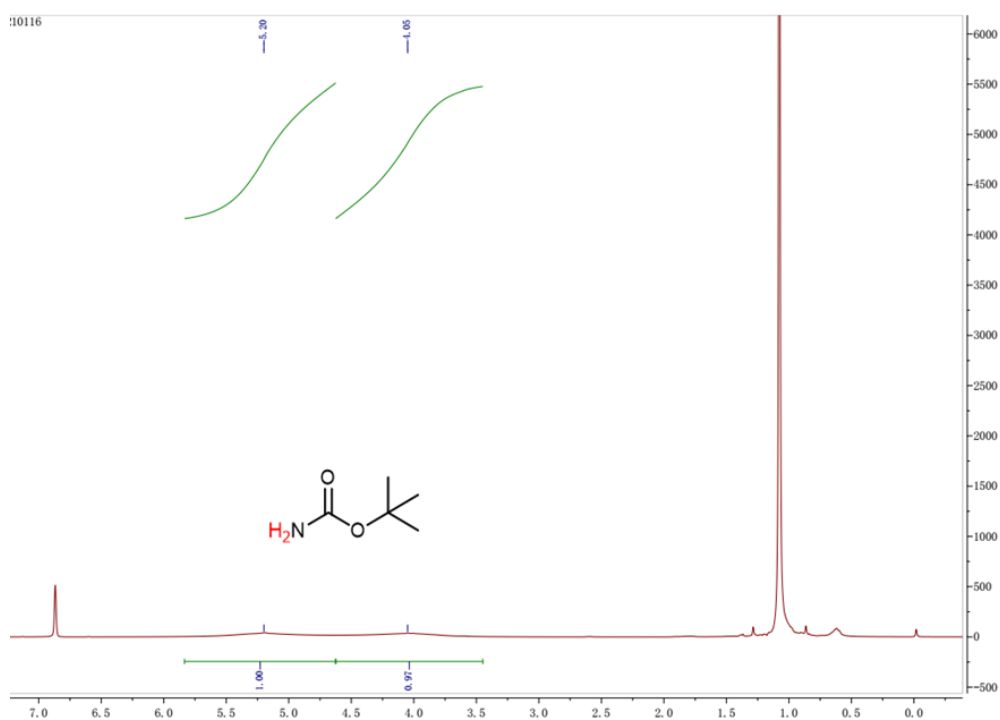

b)  $^1\text{H}$  NMR of (L10 + Et $_2$ Zn + Boc-NH $_2$ )

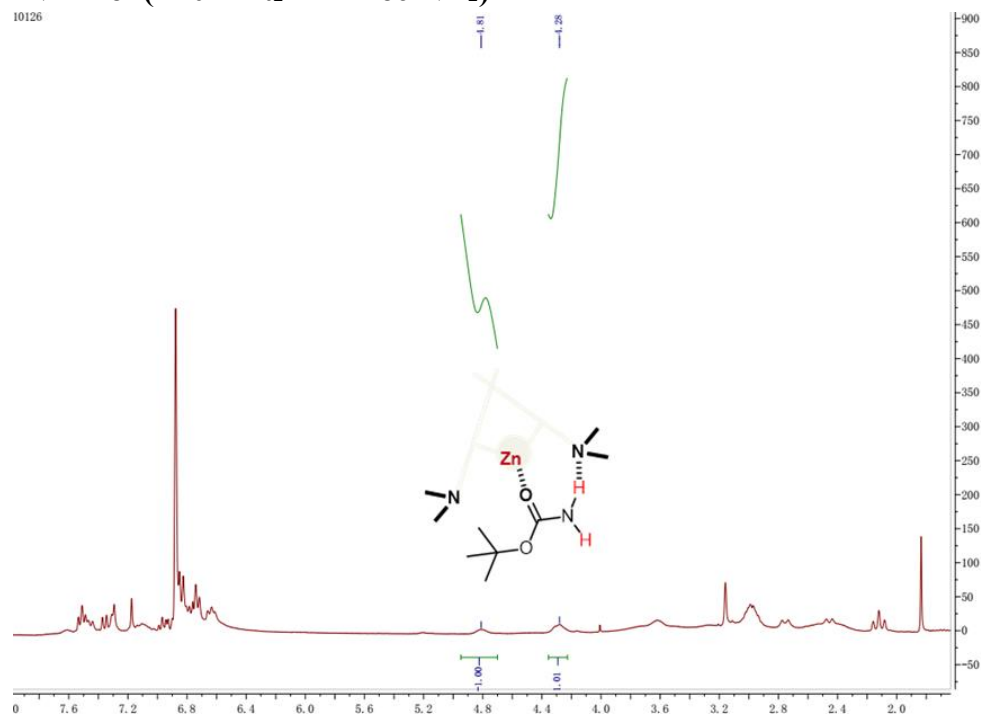

Figure S4. NMR experiment of additive influence

## X-Ray Analysis of Product 2a

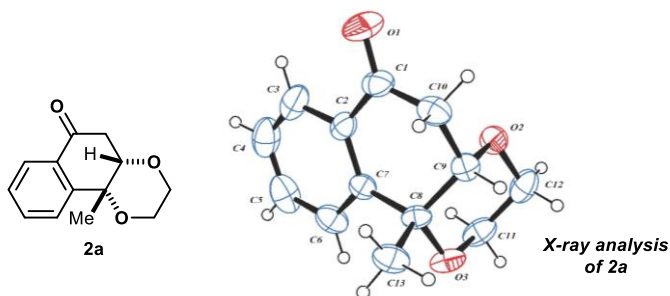

|                 |                |                    |              |
|-----------------|----------------|--------------------|--------------|
| Bond precision: | C-C = 0.0035 Å | Wavelength=1.54184 |              |
| Cell:           | a=8.20676(18)  | b=11.3756(2)       | c=12.0915(3) |
|                 | alpha=90       | beta=90            | gamma=90     |
| Temperature:    | 293 K          |                    |              |
|                 | Calculated     | Reported           |              |
| Volume          | 1128.82(4)     | 1128.82(4)         |              |
| Space group     | P 21 21 21     | P 21 21 21         |              |
| Hall group      | P 2ac 2ab      | P 2ac 2ab          |              |
| Moiety formula  | C13 H14 O3     | C13 H14 O3         |              |
| Sum formula     | C13 H14 O3     | C13 H14 O3         |              |
| Mr              | 218.24         | 218.24             |              |
| Dx,g cm-3       | 1.284          | 1.284              |              |
| Z               | 4              | 4                  |              |
| Mu (mm-1)       | 0.741          | 0.741              |              |
| F000            | 464.0          | 464.0              |              |
| F000'           | 465.48         |                    |              |
| h,k,lmax        | 9,13,14        | 9,13,14            |              |
| Nref            | 2134[ 1248]    | 2111               |              |
| Tmin,Tmax       | 0.882,0.901    | 0.015,1.000        |              |
| Tmin'           | 0.882          |                    |              |

Correction method= # Reported T Limits: Tmin=0.015 Tmax=1.000

AbsCorr = MULTI-SCAN

Data completeness= 1.69/0.99

Theta(max)= 69.839

R(reflections)= 0.0425( 1997)

wR2(reflections)= 0.1081( 2111)

S = 1.112

Npar= 146

## Gram Scale Trial of the Oxa-Michael KR Reaction and Transformation of the Resolution Products

### I) Gram scale experiments of the KR process

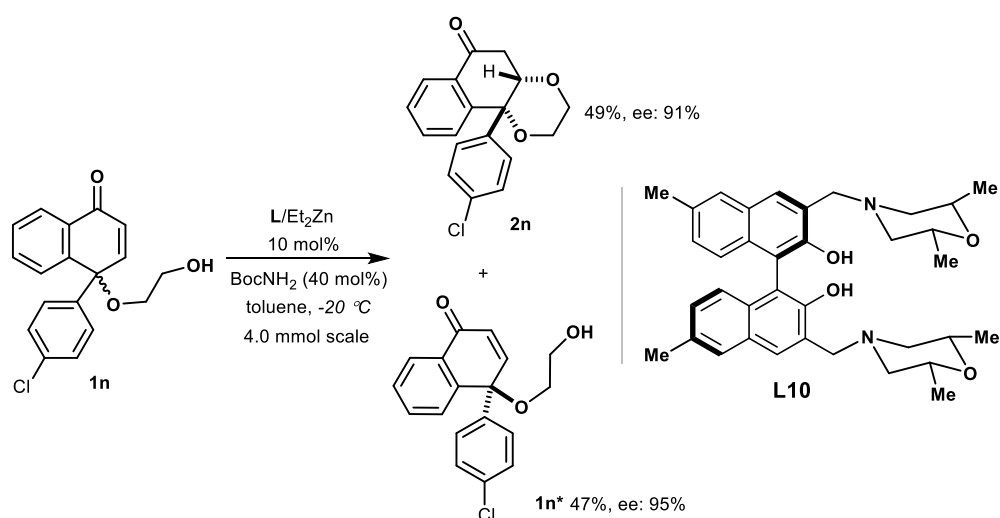

To a stirred solution of **L10** (227.33 mg, 0.40 mmol) in toluene (10.0 mL) was added  $\text{Et}_2\text{Zn}$  (400  $\mu\text{L}$ , 1.0 M in toluene, 0.40 mmol) under an argon atmosphere, the mixture was then stirred at room temperature for 30 min to generate the catalyst. **1n** (4.0 mmol) and  $\text{BocNH}_2$  (187.20 mg, 40 mol%) in toluene (10.0 mL) was quickly added to the flask containing the in situ generated zinc catalyst. After the addition, the reaction was stirred at  $-20^\circ\text{C}$  for about 2 h. The reaction was quenched with saturated  $\text{NH}_4\text{Cl}$  and extracted with DCM. The organic layer was dried over  $\text{Na}_2\text{SO}_4$  and concentrated under vacuum. Then the residue was purified by column chromatography (petroleum ether/ethyl acetate = 10:1 - 4:1) to afford the product **1n\*** (0.59 g, 47% yield) and **2n** (0.62 g, 49% yield).

### II) Transformation of the Resolution Products

(a) The separated product **2a** through recrystallization (1.0 equiv) was dissolved in THF, then LiHMDS (1.2 equiv) was added under an argon atmosphere at -40 °C. The mixture was stirred for further 0.5 hours, followed by cooling to -70 °C and bistrifluoromethylsulfonylaminochloropyridine (1.1 equiv) was added. The reaction was slowly warmed to room temperature and stirred for further 12 hours. After completed, the mixture was quenched with saturated NH<sub>4</sub>Cl solution and extracted with EA. The organic layer was dried over Na<sub>2</sub>SO<sub>4</sub> and concentrated under vacuum. Then the residue was purified by column chromatography (petroleum ether/ethyl acetate = 10:1) to afford the product **3** (62% yield).

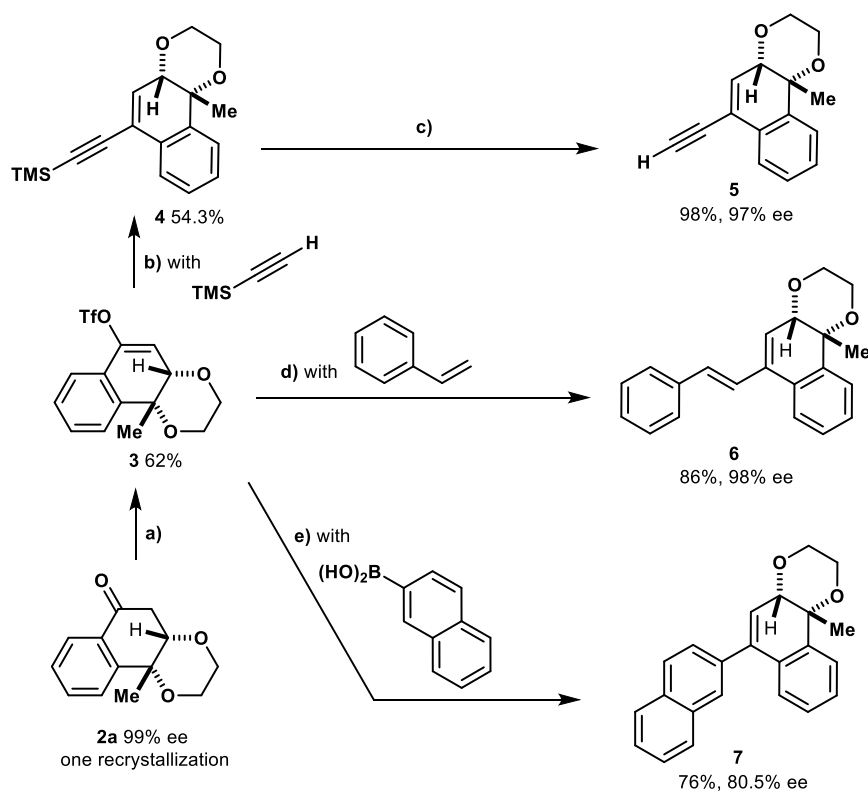

(b) Compound **3** (119mg, 0.34 mmol), Pd(PPh<sub>3</sub>)<sub>4</sub> (2.5 mol%), Et<sub>3</sub>N (2.0 equiv) and CuI (2.5 mol%) was stirred in DMF, then trimethylsilylacetylene (5.0 equiv) was added under an argon atmosphere at rt. After completed, the mixture was quenched with H<sub>2</sub>O, extracted with EA, dried with Na<sub>2</sub>SO<sub>4</sub>, then purified via flash column chromatography (petroleum ether/ethyl acetate = 20:1) to give the product **4** (55 mg, 54.3 % yield).

<sup>1</sup>H NMR (300 MHz, CDCl<sub>3</sub>): δ 7.68 (dd, J = 7.4, 1.4 Hz, 1H), 7.53 (dd, J = 7.4, 1.4 Hz,

1H), 7.42 – 7.28 (m, 2H), 6.43 (d, J = 6.4 Hz, 1H), 3.90 (d, J = 6.4 Hz, 1H), 3.75 (m, 2H), 3.66 – 3.48 (m, 2H), 1.30 (s, 3H), 0.26 (s, 9H); <sup>13</sup>C NMR (75 MHz, CDCl<sub>3</sub>): δ 138.48, 130.94, 130.19, 129.44, 127.54, 127.04, 125.21, 124.47, 101.81, 98.81, 77.58, 77.36, 77.16, 76.73, 74.45, 66.36, 61.68, 27.31, 0.00.

(c) A solution of K<sub>2</sub>CO<sub>3</sub> (11 mg, 40 mmol%) in 5 ml MeOH was added the compound **4** (55 mg, 0.19 mmol), the mixture was stirred at room temperature. After completed, the mixture was quenched with H<sub>2</sub>O and concentrated under vacuum, extracted with EA, dried with Na<sub>2</sub>SO<sub>4</sub>, then purified via flash column chromatography to obtain the product **5** (40 mg, 98 % yield).

Yellow solid, m.p. 84 – 86°C; 97% ee determined by HPLC on Chiralpak IC-H column (*n*-hexane/*i*-PrOH = 9/1, flow rate = 1.0 mL/min, *t*<sub>major</sub> = 6.841 min, *t*<sub>minor</sub> = 7.287 min); [α]<sub>D</sub><sup>26.3</sup> = 305.0 (c = 1.0 in CHCl<sub>3</sub>); <sup>1</sup>H NMR (300 MHz, CDCl<sub>3</sub>): δ 7.70 (dd, J = 7.5, 1.3 Hz, 1H), 7.54 (dd, J = 7.5, 1.2 Hz, 1H), 7.35 (m, J = 19.8, 7.4, 1.4 Hz, 2H), 6.48 (d, J = 6.4 Hz, 1H), 3.92 (d, J = 6.4 Hz, 1H), 3.72 (m, J = 23.5, 14.9, 11.7, 9.4 Hz, 4H), 3.21 (s, 1H), 1.31 (s, 3H); <sup>13</sup>C NMR (75 MHz, CDCl<sub>3</sub>): δ 138.38, 130.96, 130.69, 129.51, 127.52, 126.89, 124.46, 124.40, 81.05, 80.46, 77.51, 77.09, 76.67, 74.38, 74.25, 66.30, 61.60, 27.23; IR (neat): 3454, 3295, 2960, 2925, 2862, 1617, 1448, 1246, 1100, 756 cm<sup>-1</sup>; HRMS (ESI): C<sub>15</sub>H<sub>14</sub>O<sub>2</sub> [M + Na]<sup>+</sup> calcd: 249.0886, found: 249.0900.

(d) Compound **3** (0.43 mmol), Pd(OAc)<sub>2</sub> (10 mol%), Et<sub>3</sub>N (5.0 equiv) and PPh<sub>3</sub> (20 mol%) was stirred in THF/CH<sub>3</sub>CN (3/1), then styrene (2.0 equiv) was added under an argon atmosphere at room temperature. After completed, the mixture was quenched with H<sub>2</sub>O, extracted with EA, dried with Na<sub>2</sub>SO<sub>4</sub>, then purified via flash column chromatography (petroleum ether/ethyl acetate = 10:1) to give the product **6** (112.5 mg, 86% yield).

Yellow oil liquid, 98% ee determined by HPLC on Chiralpak IA-H column (*n*-hexane/*i*-PrOH = 8/2, flow rate = 1.0 mL/min, *t*<sub>major</sub> = 8.163 min, *t*<sub>minor</sub> = 9.086 min); [α]<sub>D</sub><sup>26.3</sup> = 67.0 (c = 1.0 in CHCl<sub>3</sub>); <sup>1</sup>H NMR (300 MHz, CDCl<sub>3</sub>): δ 7.59 (dd, J = 7.5, 1.0 Hz, 1H), 7.47 (d, J = 7.7 Hz, 3H), 7.30 (m, J = 19.7, 14.3, 6.7 Hz, 5H), 7.10 – 6.89 (m, 2H), 6.27

(d,  $J = 6.6$  Hz, 1H), 3.96 (d,  $J = 6.6$  Hz, 1H), 3.87 – 3.54 (m, 4H), 1.37 (s, 3H);  $^{13}\text{C}$  NMR (75 MHz,  $\text{CDCl}_3$ ):  $\delta$  139.28, 139.12, 137.03, 132.76, 132.71, 129.53, 128.98, 128.76, 128.08, 127.37, 126.78, 125.87, 125.74, 124.92, 123.73, 120.45, 77.55, 77.32, 77.12, 76.70, 75.01, 74.92, 66.44, 61.58, 27.15; IR (neat): 3424, 2958, 2925, 2859, 1448, 1213, 1105, 752, 693, 633  $\text{cm}^{-1}$ ; HRMS (ESI):  $\text{C}_{21}\text{H}_{20}\text{O}_2$   $[\text{M} + \text{Na}]^+$  calcd: 327.1356, found: 327.1368.

(e) Compound **3** (146mg, 0.42 mmol), 2-Naphthaleneboronic acid(108.4mg, 1.5 equiv)  $\text{Pd}(\text{PPh}_3)_4$  (2.5 mol%),  $\text{K}_2\text{CO}_3$  (232mg, 4.0 equiv) in toluene/EtOH/ $\text{H}_2\text{O}$ (5/2/1) under an argon atmosphere was stirred at reflux conditions for 15 h. After completed analyzed by TLC, the mixture was quenched with  $\text{NH}_4\text{Cl}$ , extracted with DCM, dried with  $\text{Na}_2\text{SO}_4$ , then purified via flash column chromatography (petroleum ether/ethyl acetate = 4:1) to give the product **7** (105 mg, 76% yield).

White solid, m.p. 182 – 184°C; 80.5% ee determined by HPLC on Chiralpak IA-H column (*n*-hexane/*i*-PrOH = 7/3, flow rate = 1.0 mL/min,  $t_{\text{major}} = 5.462$  min,  $t_{\text{minor}} = 6.054$  min);  $[\alpha]_{\text{D}}^{26.3} = 62.0$  ( $c = 1.0$  in  $\text{CHCl}_3$ );  $^1\text{H}$  NMR (300 MHz,  $\text{CDCl}_3$ ):  $\delta$  7.84 (dd,  $J = 15.2, 7.0$  Hz, 4H), 7.64 (d,  $J = 7.3$  Hz, 1H), 7.55 – 7.42 (m, 3H), 7.36 (t,  $J = 7.4$  Hz, 1H), 7.24 – 7.06 (m, 2H), 6.16 (d,  $J = 6.5$  Hz, 1H), 4.01 (d,  $J = 6.5$  Hz, 1H), 3.94 – 3.59 (m, 4H), 1.48 (s, 3H);  $^{13}\text{C}$  NMR (75 MHz,  $\text{CDCl}_3$ ):  $\delta$  143.19, 139.59, 137.02, 133.39, 133.28, 132.98, 128.92, 128.12, 127.79, 127.75, 127.20, 126.91, 126.36, 126.25, 124.81, 123.51, 77.57, 77.15, 76.73, 75.07, 74.99, 66.67, 61.69, 27.42; IR (neat): 3340, 2957, 2925, 2854, 1629, 1600, 1451, 1096, 816, 756  $\text{cm}^{-1}$ ; HRMS (ESI):  $\text{C}_{23}\text{H}_{20}\text{O}_2$   $[\text{M} + \text{Na}]^+$  calcd: 351.1356, found: 351.1364.

## HPLC Results

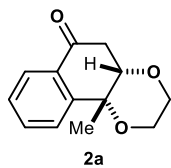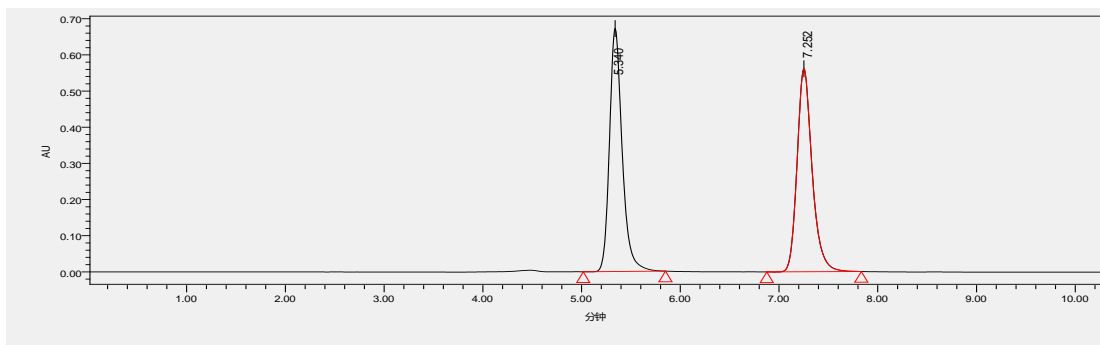

|   | Retention Time | Area    | % Area | Height |
|---|----------------|---------|--------|--------|
| 1 | 5.340          | 6010215 | 50.24  | 672388 |
| 2 | 7.252          | 5953149 | 49.76  | 562143 |

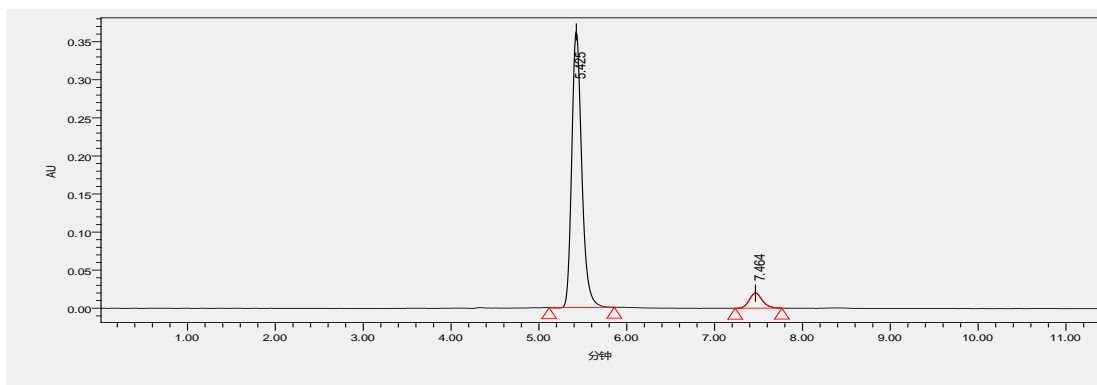

|   | Retention Time | Area    | % Area | Height |
|---|----------------|---------|--------|--------|
| 1 | 5.425          | 2835227 | 95.22  | 362039 |
| 2 | 7.464          | 142479  | 4.78   | 16815  |

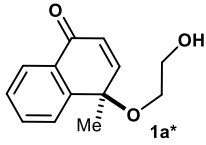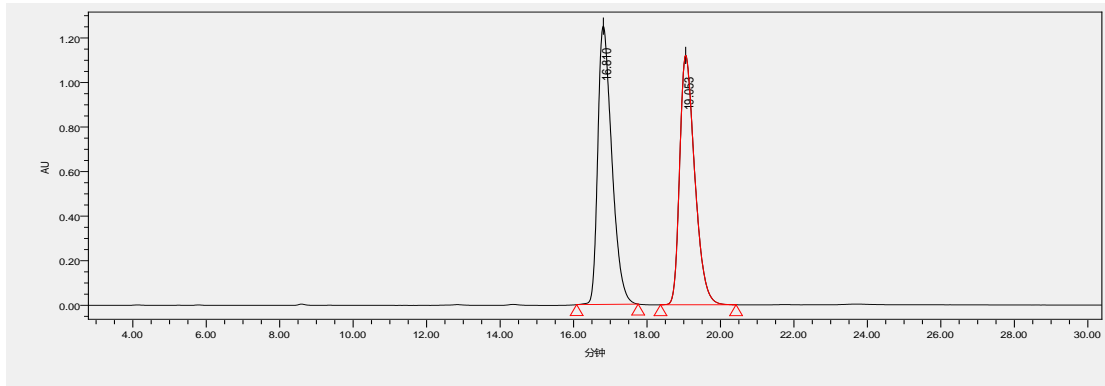

|   | Retention Time | Area     | % Area | Height  |
|---|----------------|----------|--------|---------|
| 1 | 16.810         | 33145297 | 50.99  | 1249595 |
| 2 | 19.053         | 31859223 | 49.01  | 1119834 |

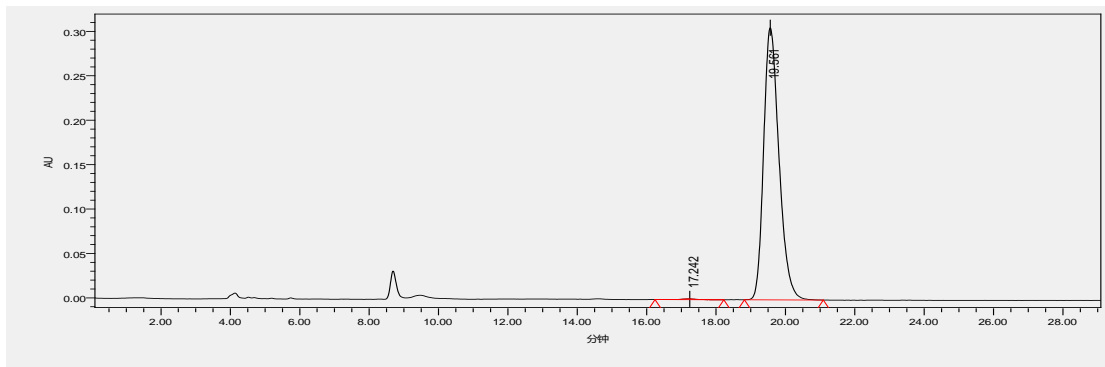

|   | Retention Time | Area    | % Area | Height |
|---|----------------|---------|--------|--------|
| 1 | 17.258         | 3301    | 0.06   | 147    |
| 2 | 19.561         | 5386741 | 99.94  | 175077 |



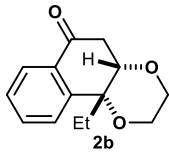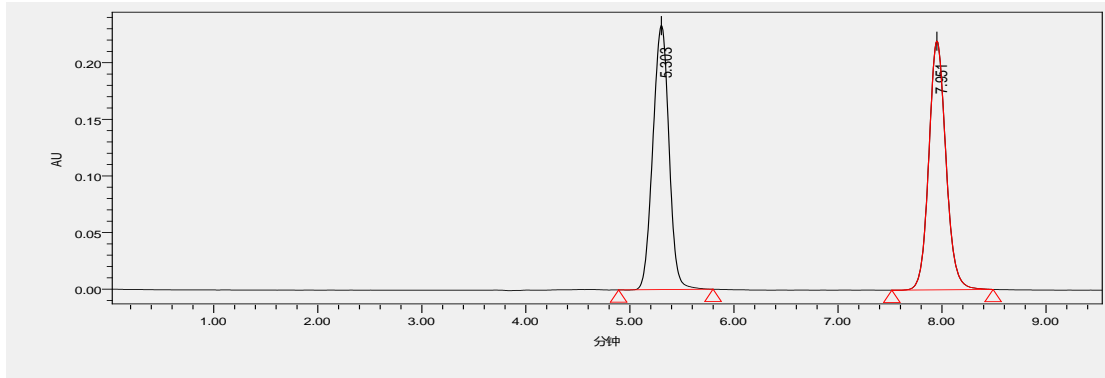

|   | Retention Time | Area    | % Area | Height |
|---|----------------|---------|--------|--------|
| 1 | 5.303          | 2514365 | 49.99  | 233393 |
| 2 | 7.951          | 2515458 | 50.01  | 219827 |

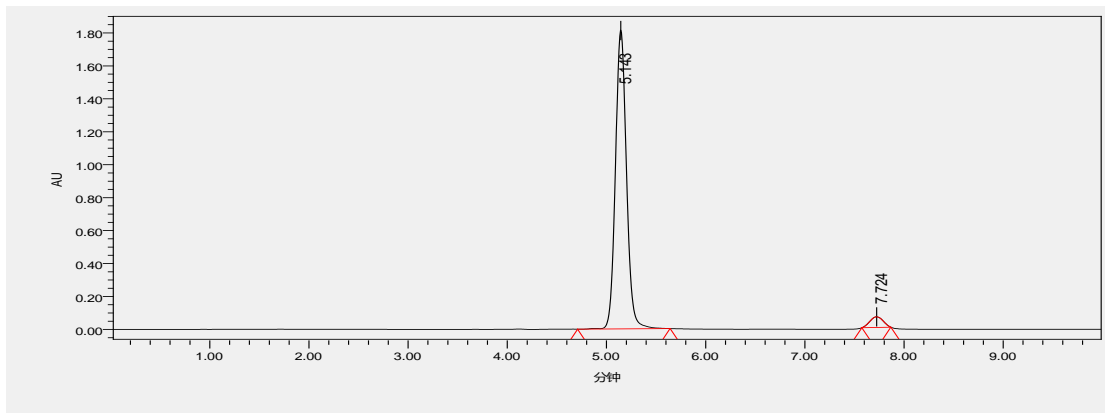

|   | Retention Time | Area     | % Area | Height  |
|---|----------------|----------|--------|---------|
| 1 | 5.143          | 13955384 | 95.91  | 1815276 |
| 2 | 7.724          | 595340   | 4.09   | 64880   |

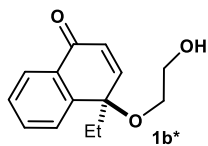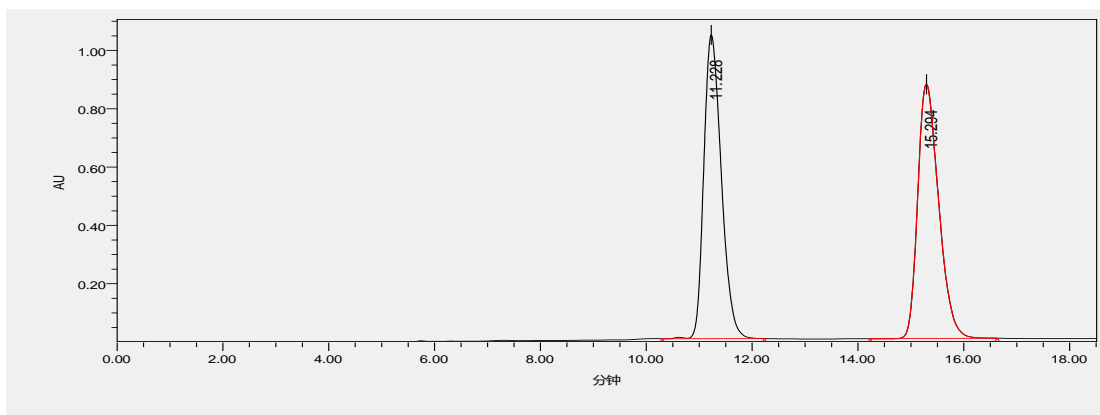

|   | Retention Time | Area     | % Area | Height  |
|---|----------------|----------|--------|---------|
| 1 | 11.228         | 23974400 | 50.03  | 1041852 |
| 2 | 15.294         | 23949394 | 49.97  | 871949  |

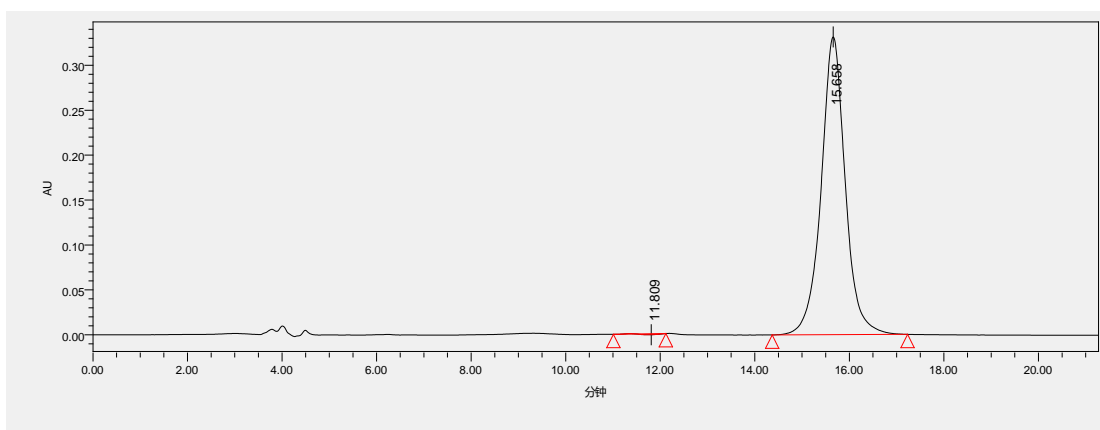

|   | Retention Time | Area     | % Area | Height |
|---|----------------|----------|--------|--------|
| 1 | 11.809         | 31896    | 0.27   | -1034  |
| 2 | 15.658         | 11737673 | 99.73  | 331324 |

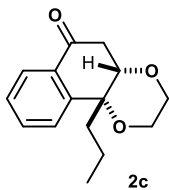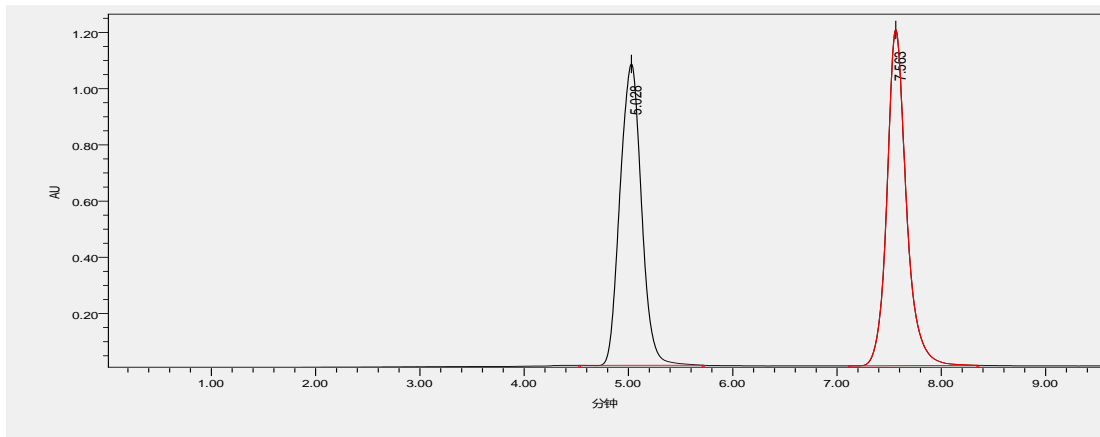

|   | Retention Time | Area     | % Area | Height  |
|---|----------------|----------|--------|---------|
| 1 | 5.028          | 15281053 | 49.71  | 1072444 |
| 2 | 7.563          | 15457556 | 50.29  | 1195365 |

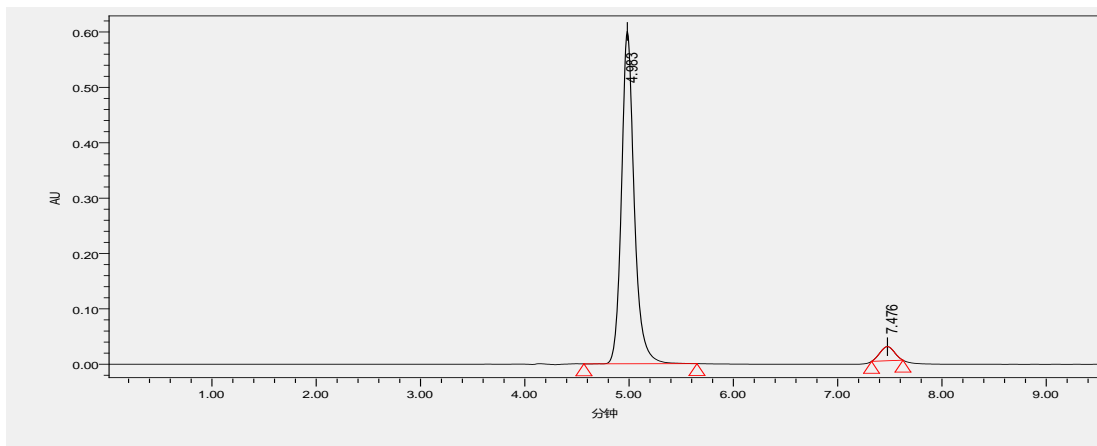

|   | Retention Time | Area    | % Area | Height |
|---|----------------|---------|--------|--------|
| 1 | 4.983          | 5120395 | 95.46  | 600339 |
| 2 | 7.476          | 243488  | 4.54   | 25646  |

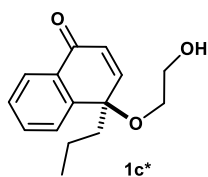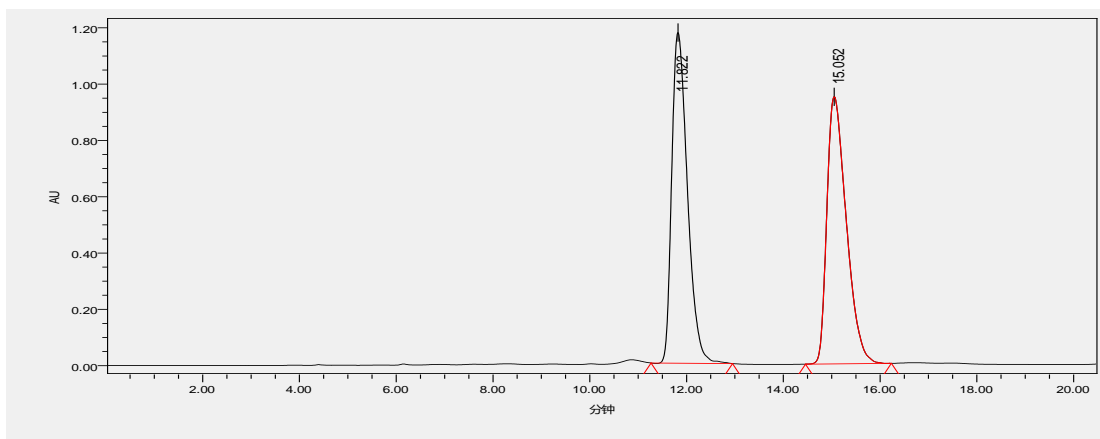

|   | Retention Time | Area     | % Area | Height  |
|---|----------------|----------|--------|---------|
| 1 | 11.822         | 26490656 | 50.04  | 1174615 |
| 2 | 15.052         | 26448098 | 49.96  | 949054  |

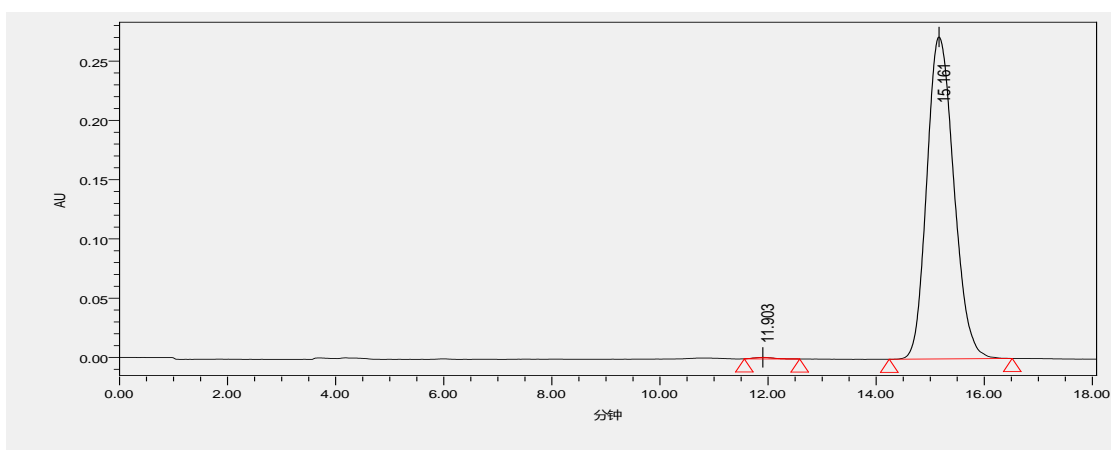

|   | Retention Time | Area    | % Area | Height |
|---|----------------|---------|--------|--------|
| 1 | 11.903         | 30599   | 0.32   | 1287   |
| 2 | 15.161         | 9433301 | 99.68  | 271592 |

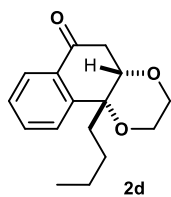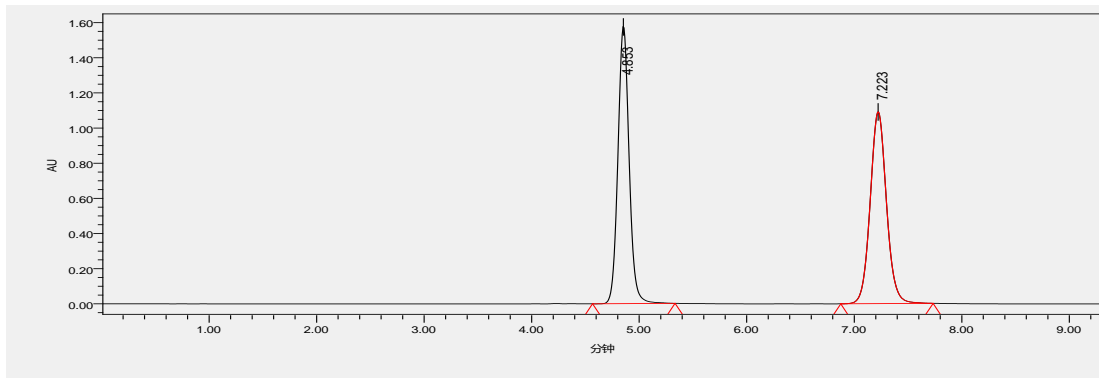

|   | Retention Time | Area     | % Area | Height  |
|---|----------------|----------|--------|---------|
| 1 | 4.853          | 12079523 | 49.84  | 1663309 |
| 2 | 7.223          | 12155057 | 50.16  | 1153175 |

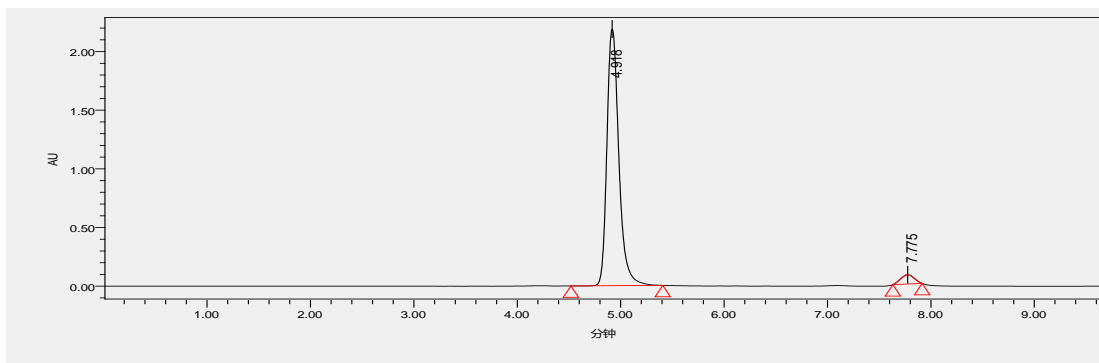

|   | Retention Time | Area     | % Area | Height  |
|---|----------------|----------|--------|---------|
| 1 | 4.918          | 17572865 | 96.58  | 2187766 |
| 2 | 7.775          | 622715   | 3.42   | 73080   |

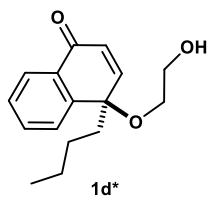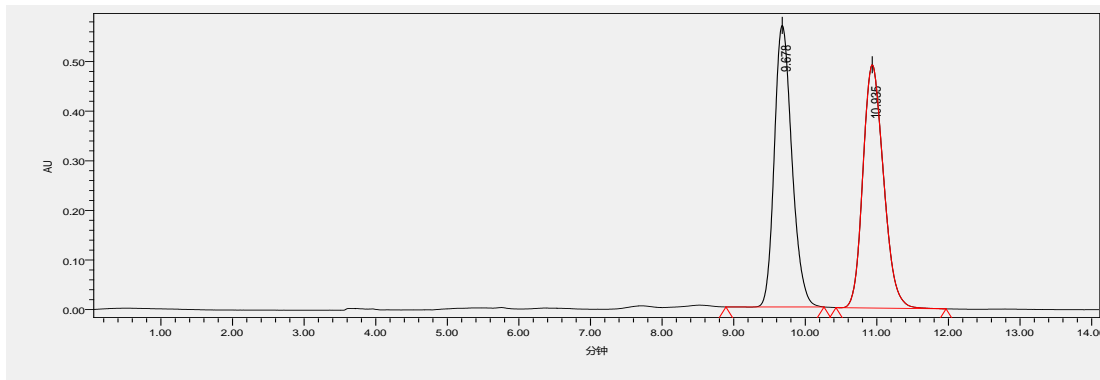

|   | Retention Time | Area    | % Area | Height |
|---|----------------|---------|--------|--------|
| 1 | 9.678          | 9691352 | 49.70  | 567421 |
| 2 | 10.935         | 9810010 | 50.30  | 490106 |

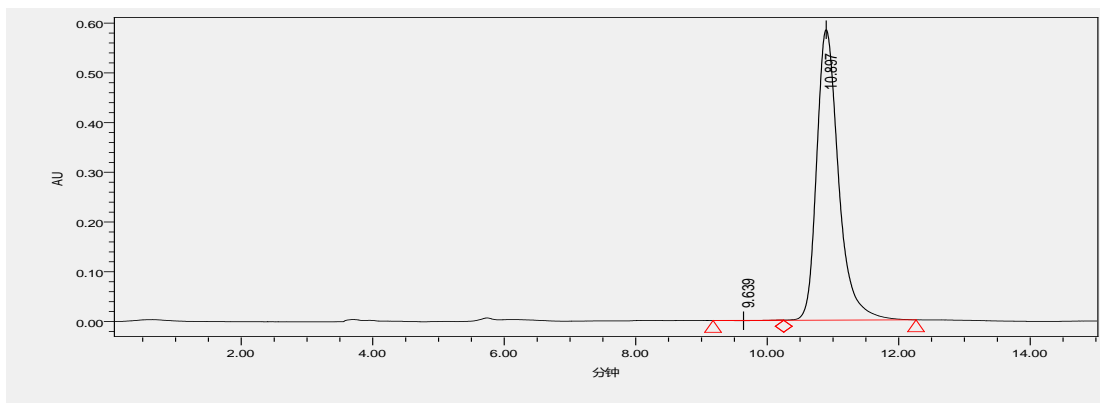

|   | Retention Time | Area     | % Area | Height |
|---|----------------|----------|--------|--------|
| 1 | 9.639          | 16954    | 0.13   | -642   |
| 2 | 10.897         | 13516904 | 99.87  | 583981 |

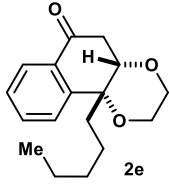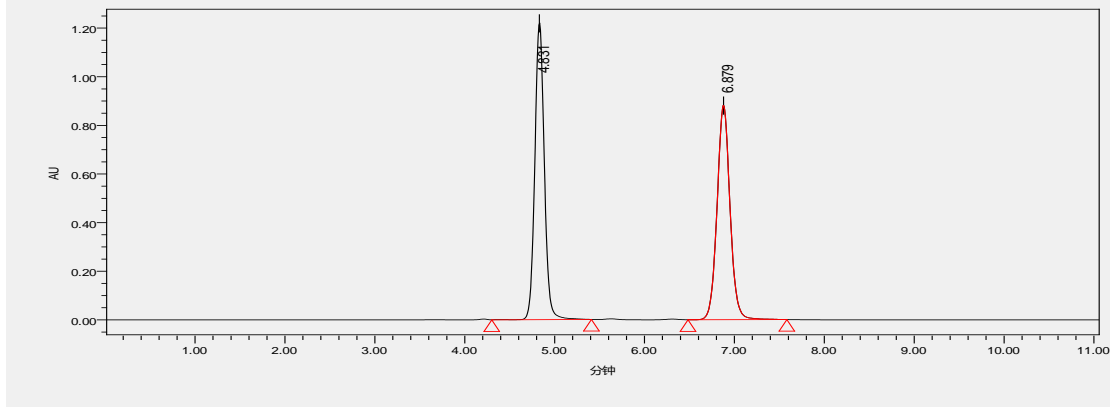

|   | Retention Time | Area    | % Area | Height  |
|---|----------------|---------|--------|---------|
| 1 | 4.831          | 8949611 | 50.28  | 1221229 |
| 2 | 6.879          | 8848598 | 49.72  | 882224  |

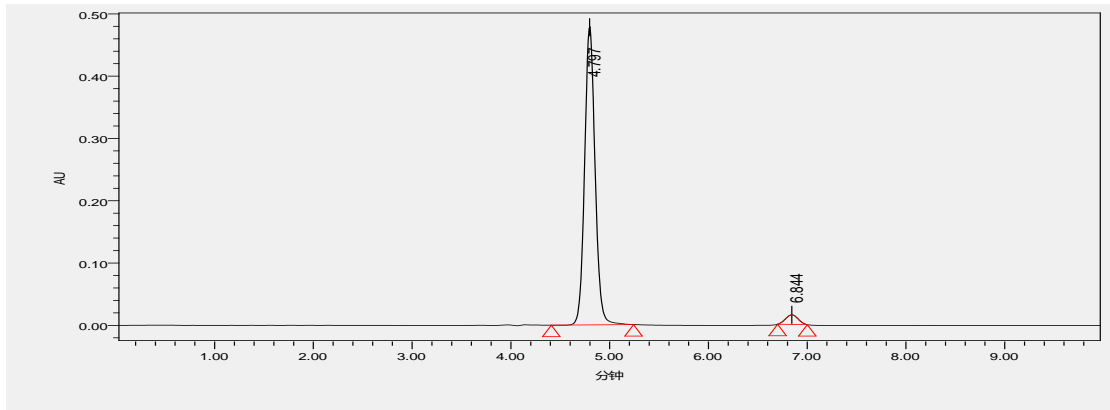

|   | Retention Time | Area    | % Area | Height |
|---|----------------|---------|--------|--------|
| 1 | 4.797          | 3525176 | 96.30  | 479245 |
| 2 | 6.844          | 135597  | 3.70   | 15428  |

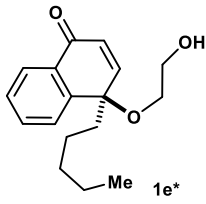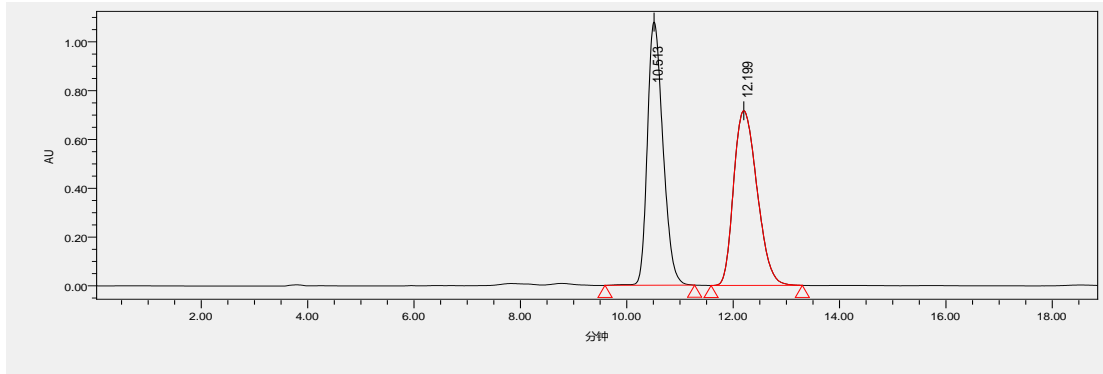

|   | Retention Time | Area     | % Area | Height  |
|---|----------------|----------|--------|---------|
| 1 | 10.513         | 21937582 | 50.04  | 1078748 |
| 2 | 12.199         | 21905058 | 49.96  | 716261  |

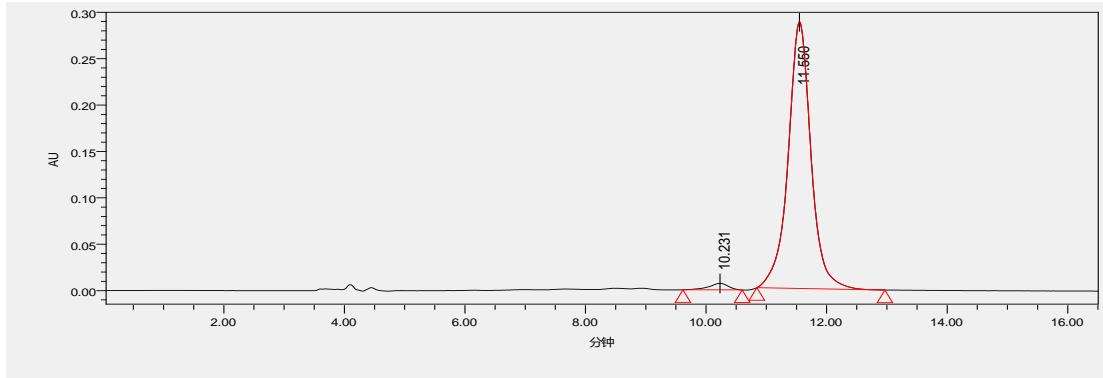

|   | Retention Time | Area    | % Area | Height |
|---|----------------|---------|--------|--------|
| 1 | 10.231         | 159500  | 2.06   | 7062   |
| 2 | 11.550         | 7574959 | 97.94  | 287408 |



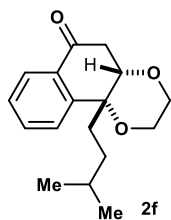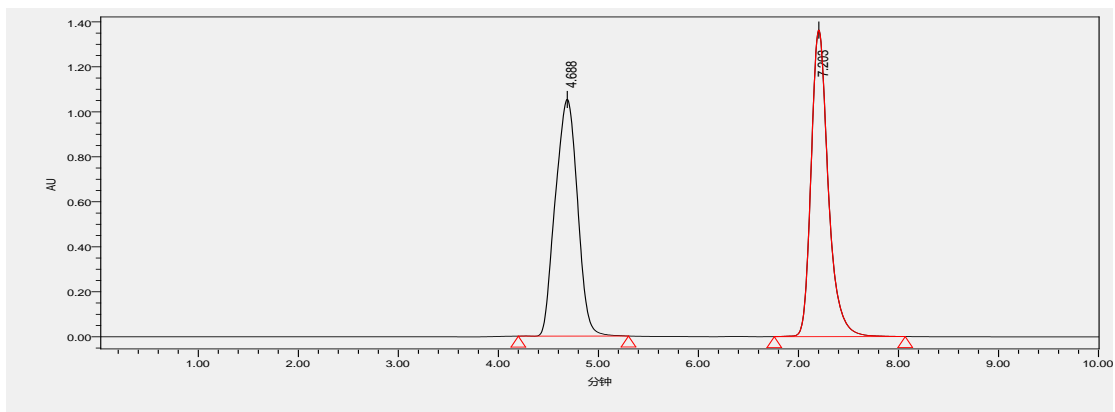

|   | Retention Time | Area     | % Area | Height  |
|---|----------------|----------|--------|---------|
| 1 | 4.688          | 16184616 | 49.92  | 1052936 |
| 2 | 7.203          | 16236894 | 50.08  | 1364264 |

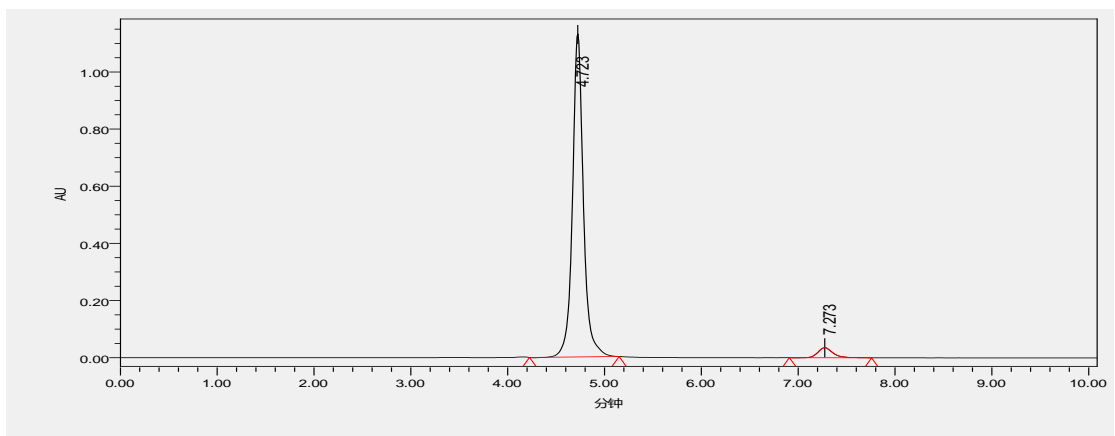

|   | Retention Time | Area    | % Area | Height  |
|---|----------------|---------|--------|---------|
| 1 | 4.723          | 8877551 | 95.91  | 1131099 |
| 2 | 7.273          | 378661  | 4.09   | 35136   |

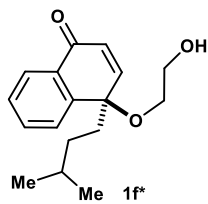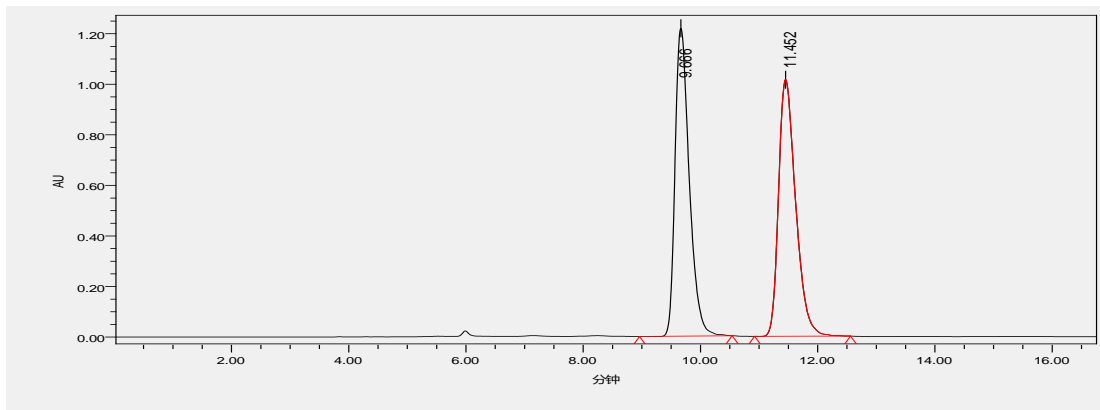

|   | Retention Time | Area     | % Area | Height  |
|---|----------------|----------|--------|---------|
| 1 | 9.666          | 20520323 | 49.93  | 1217850 |
| 2 | 11.452         | 20579182 | 50.07  | 1015679 |

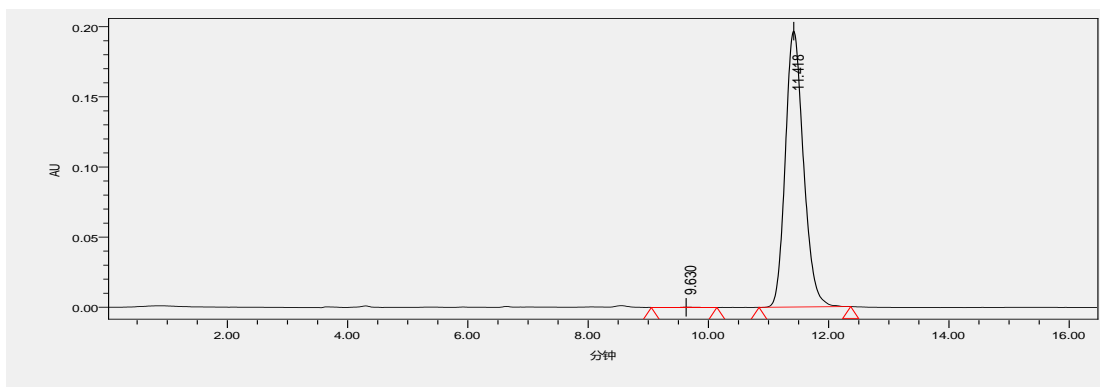

|   | Retention Time | Area    | % Area | Height |
|---|----------------|---------|--------|--------|
| 1 | 9.630          | 3089    | 0.07   | 170    |
| 2 | 11.418         | 4133992 | 99.93  | 196736 |

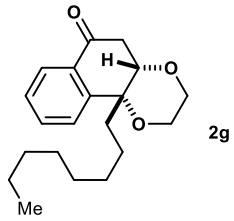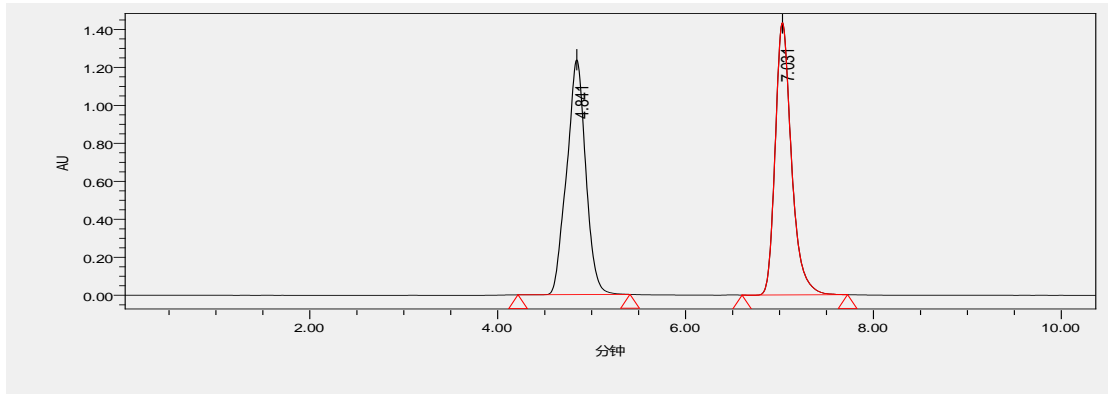

|   | Retention Time | Area     | % Area | Height  |
|---|----------------|----------|--------|---------|
| 1 | 4.841          | 17404737 | 50.12  | 1236614 |
| 2 | 7.031          | 17318250 | 49.88  | 1434269 |

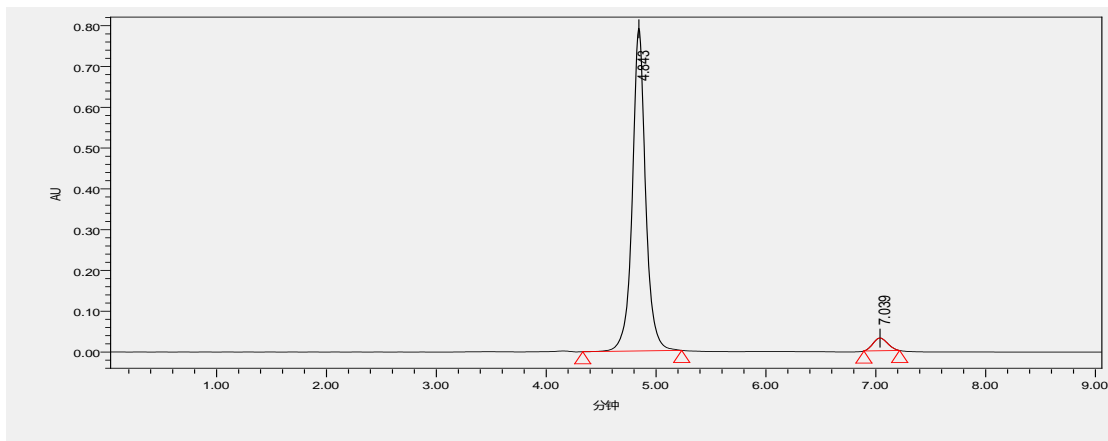

|   | Retention Time | Area    | % Area | Height |
|---|----------------|---------|--------|--------|
| 1 | 4.843          | 6644318 | 95.85  | 791674 |
| 2 | 7.039          | 287849  | 4.15   | 31179  |

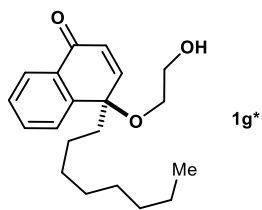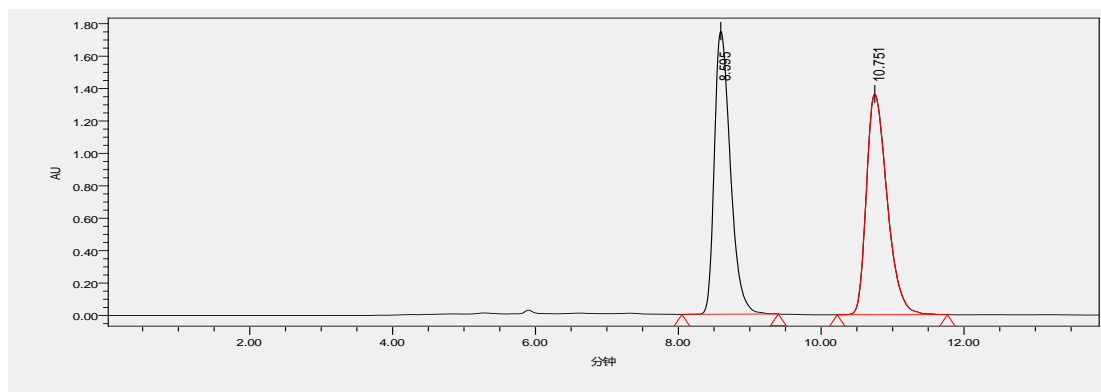

|   | Retention Time | Area     | % Area | Height  |
|---|----------------|----------|--------|---------|
| 1 | 8.595          | 27200101 | 49.72  | 1747560 |
| 2 | 10.751         | 27502587 | 50.28  | 1361162 |

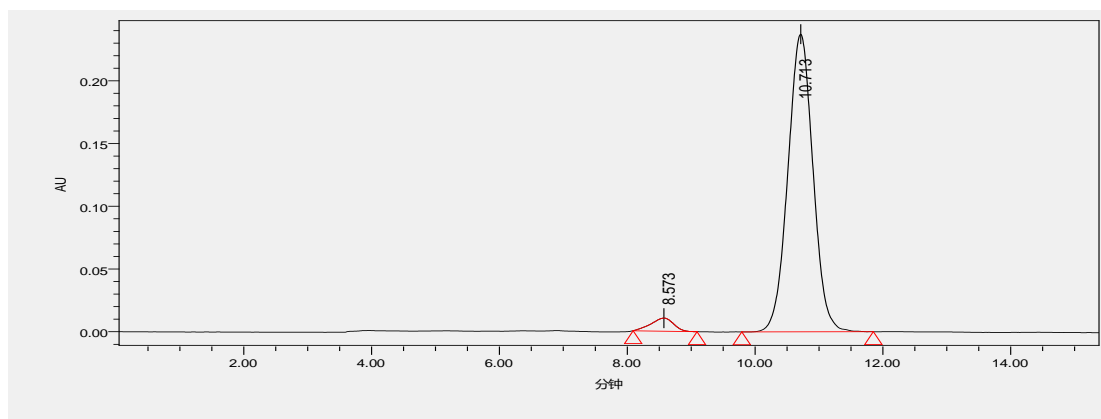

|   | Retention Time | Area     | % Area | Height |
|---|----------------|----------|--------|--------|
| 1 | 8.636          | 360386   | 3.08   | 15556  |
| 2 | 10.792         | 11349510 | 96.92  | 402316 |

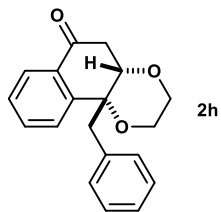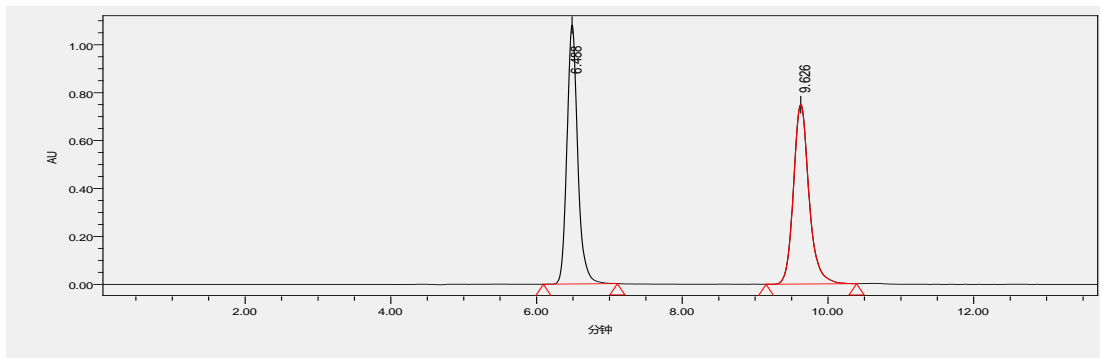

|   | Retention Time | Area     | % Area | Height  |
|---|----------------|----------|--------|---------|
| 1 | 6.488          | 1111638  | 49.97  | 1081927 |
| 2 | 9.626          | 11128445 | 50.03  | 749280  |

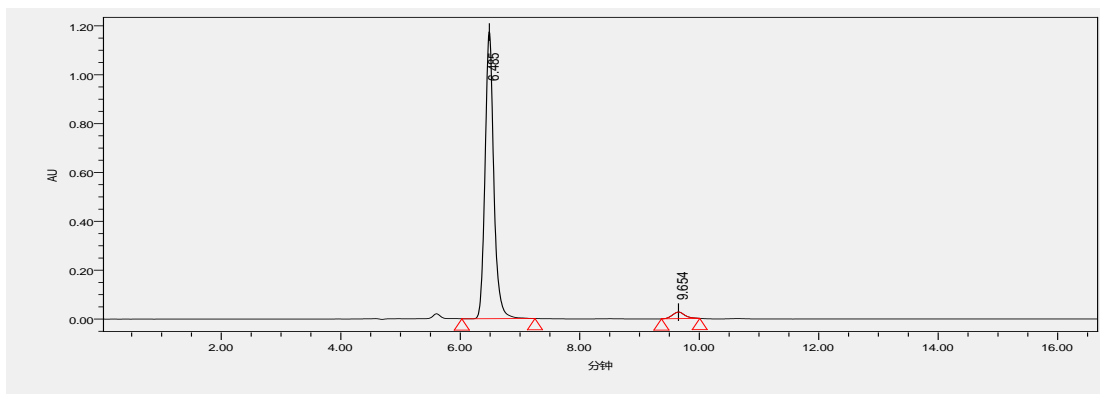

|   | Retention Time | Area     | % Area | Height  |
|---|----------------|----------|--------|---------|
| 1 | 6.485          | 11928798 | 97.06  | 1174598 |
| 2 | 9.654          | 361599   | 2.94   | 26378   |

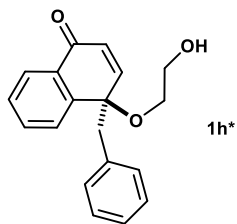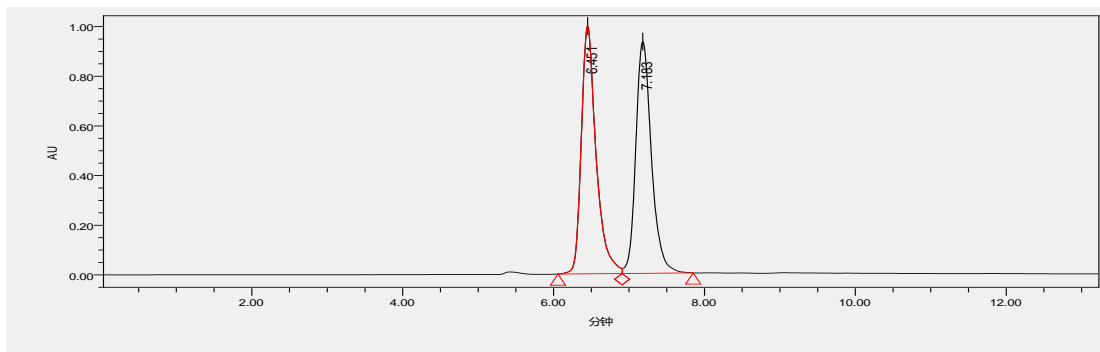

|   | Retention Time | Area     | % Area | Height |
|---|----------------|----------|--------|--------|
| 1 | 6.451          | 13553636 | 50.14  | 998570 |
| 2 | 7.183          | 13479227 | 49.86  | 933193 |

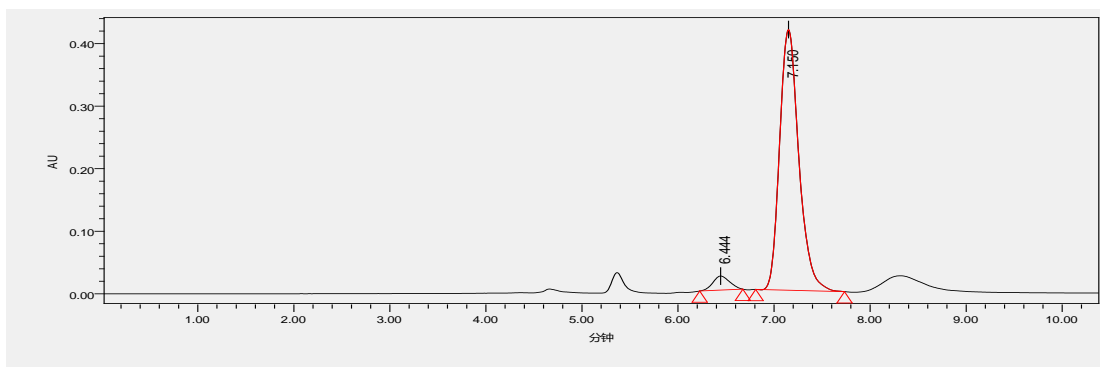

|   | Retention Time | Area    | % Area | Height |
|---|----------------|---------|--------|--------|
| 1 | 6.444          | 262712  | 4.34   | 22187  |
| 2 | 7.150          | 5794216 | 95.66  | 416656 |

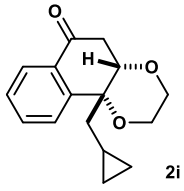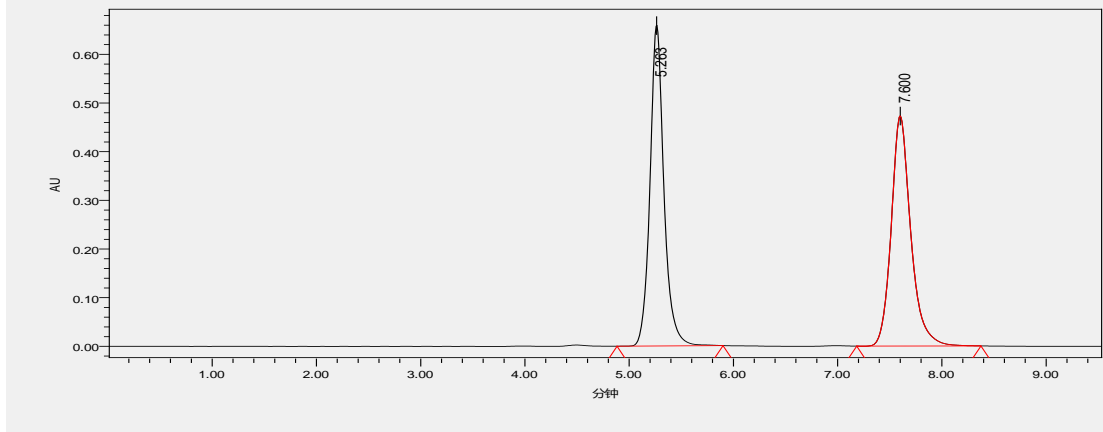

|   | Retention Time | Area    | % Area | Height |
|---|----------------|---------|--------|--------|
| 1 | 5.263          | 6131941 | 49.92  | 659711 |
| 2 | 7.600          | 6152334 | 50.08  | 472893 |

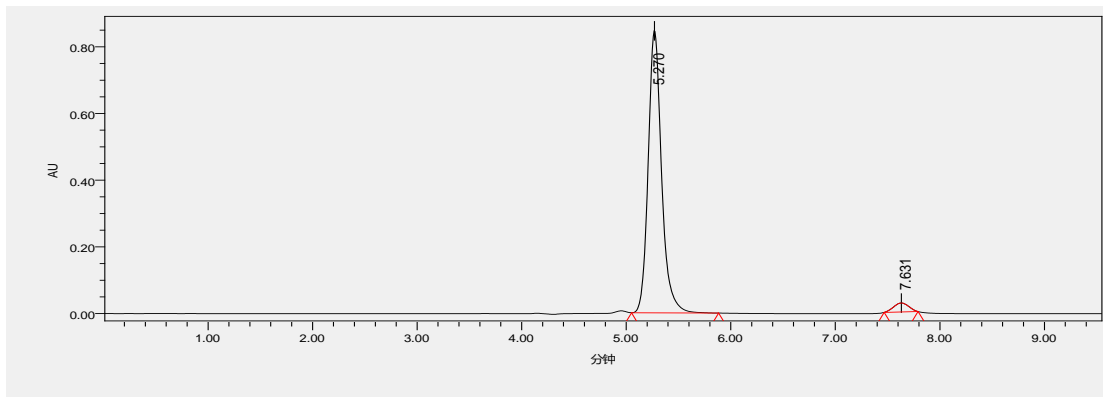

|   | Retention Time | Area    | % Area | Height |
|---|----------------|---------|--------|--------|
| 1 | 5.270          | 7520701 | 96.52  | 847501 |
| 2 | 7.631          | 270768  | 3.48   | 26939  |

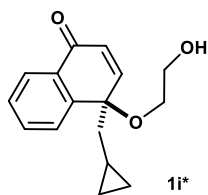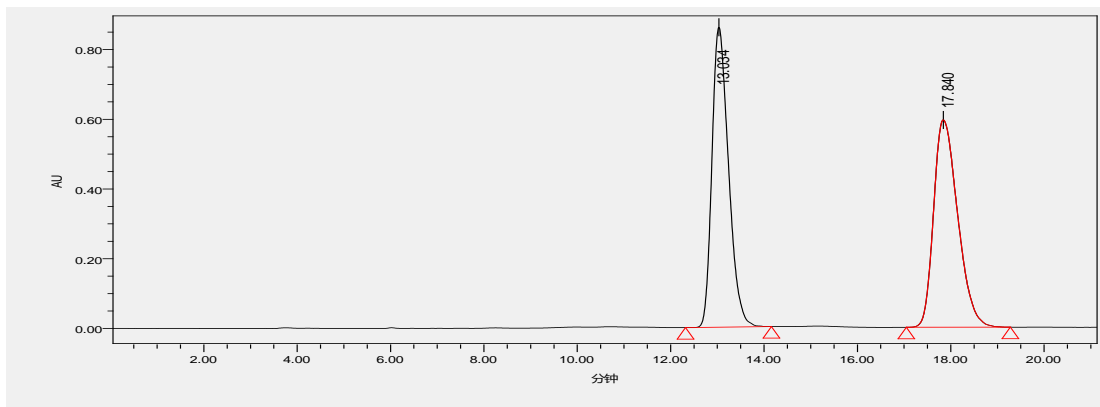

|   | Retention Time | Area     | % Area | Height |
|---|----------------|----------|--------|--------|
| 1 | 13.034         | 21249933 | 49.89  | 860359 |
| 2 | 17.840         | 21345516 | 50.11  | 594864 |

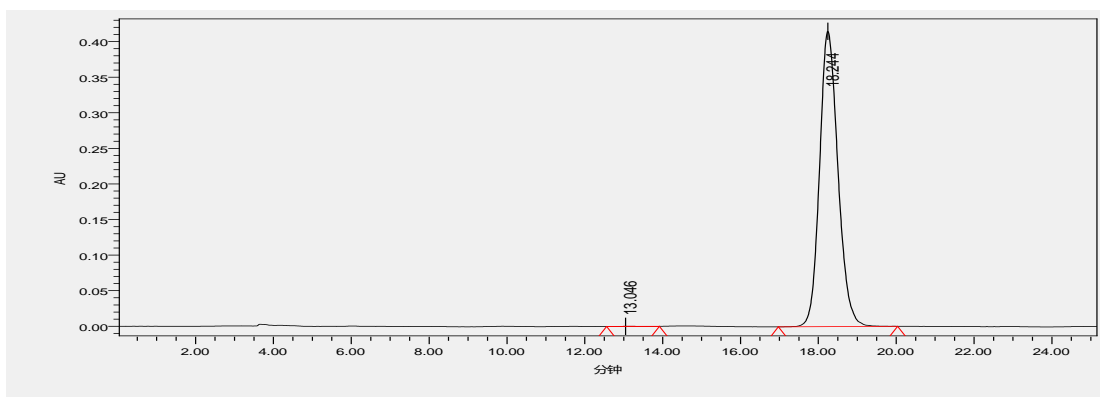

|   | Retention Time | Area     | % Area | Height |
|---|----------------|----------|--------|--------|
| 1 | 13.046         | 6591     | 0.05   | 158    |
| 2 | 18.244         | 13624774 | 99.95  | 414863 |



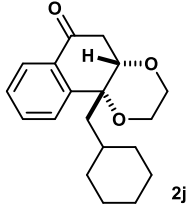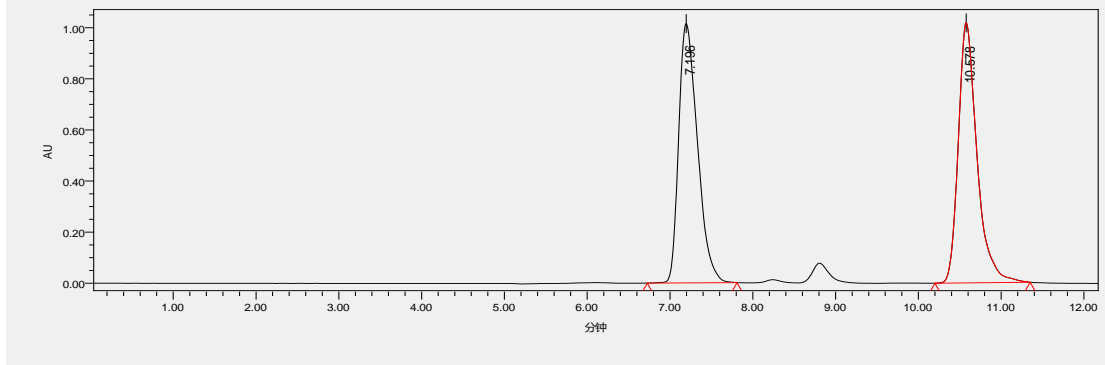

|   | Retention Time | Area     | % Area | Height  |
|---|----------------|----------|--------|---------|
| 1 | 7.196          | 15992183 | 49.99  | 1015372 |
| 2 | 10.578         | 15996229 | 50.01  | 1018930 |

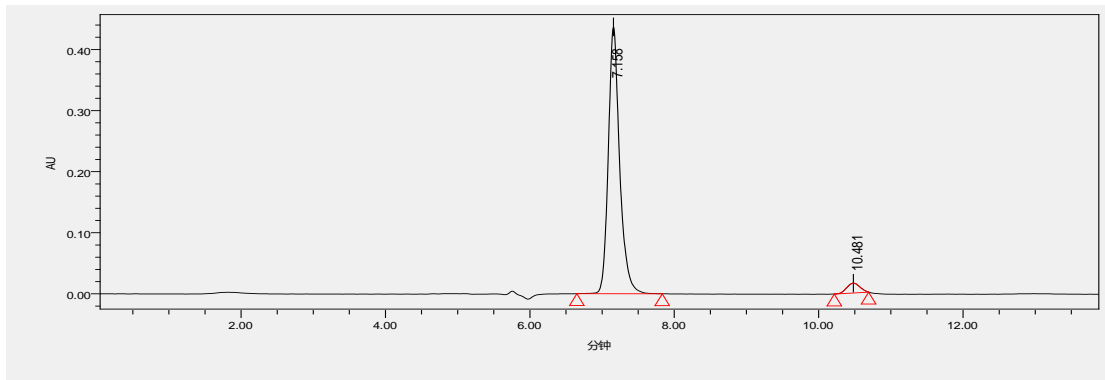

|   | Retention Time | Area    | % Area | Height |
|---|----------------|---------|--------|--------|
| 1 | 7.158          | 4777573 | 95.94  | 436654 |
| 2 | 10.481         | 202084  | 4.06   | 16044  |

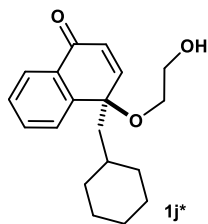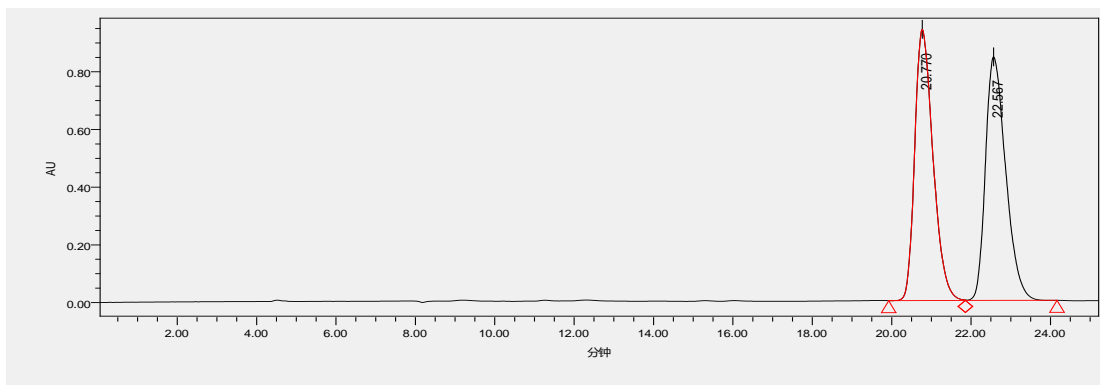

|   | Retention Time | Area     | % Area | Height |
|---|----------------|----------|--------|--------|
| 1 | 20.770         | 30069105 | 50.12  | 940258 |
| 2 | 22.567         | 29929343 | 49.88  | 844192 |

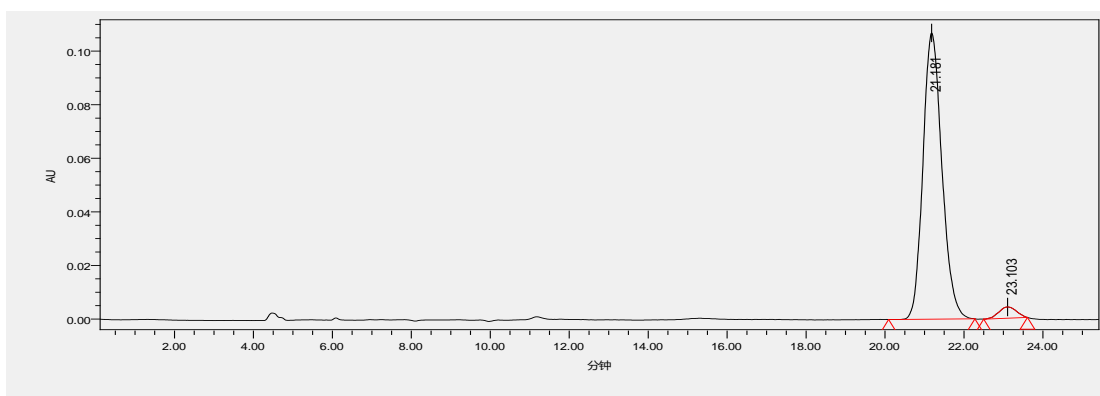

|   | Retention Time | Area    | % Area | Height |
|---|----------------|---------|--------|--------|
| 1 | 21.181         | 3567847 | 96.47  | 106853 |
| 2 | 23.103         | 130648  | 3.53   | 4192   |

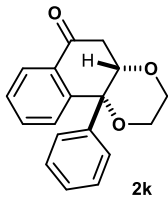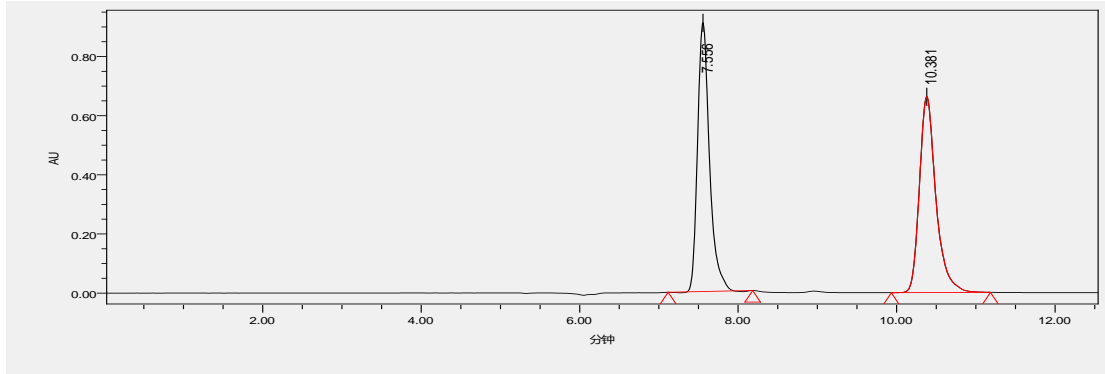

|   | Retention Time | Area    | % Area | Height |
|---|----------------|---------|--------|--------|
| 1 | 7.556          | 9580714 | 49.97  | 909576 |
| 2 | 10.381         | 9591793 | 50.03  | 662246 |

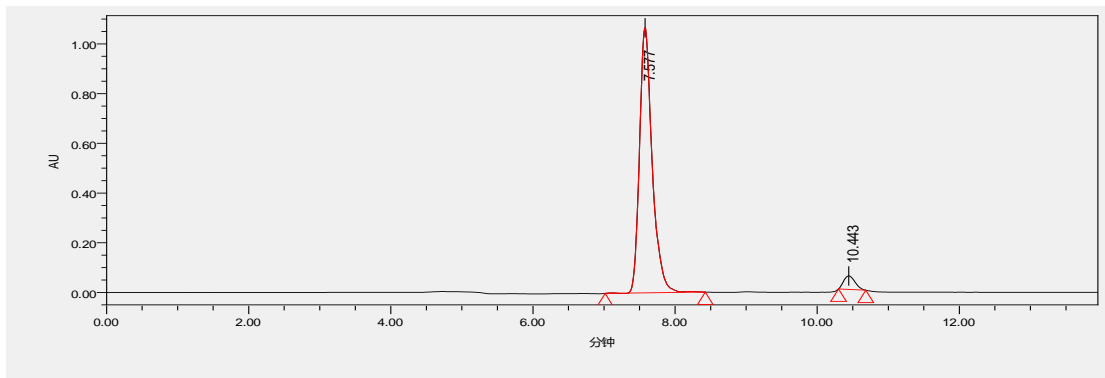

|   | Retention Time | Area     | % Area | Height  |
|---|----------------|----------|--------|---------|
| 1 | 7.577          | 13284446 | 95.64  | 1067383 |
| 2 | 10.443         | 605202   | 4.36   | 54488   |

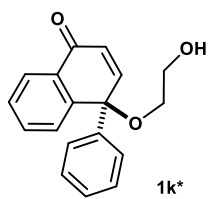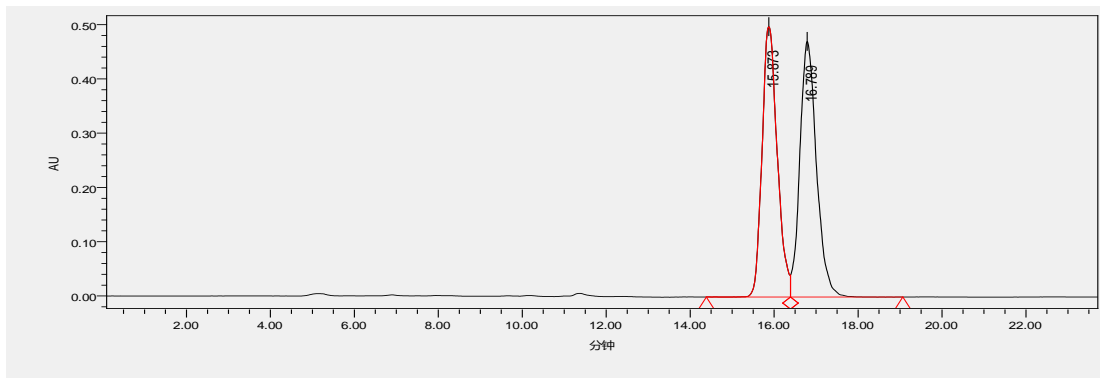

|   | Retention Time | Area     | % Area | Height |
|---|----------------|----------|--------|--------|
| 1 | 15.873         | 12524059 | 49.16  | 498032 |
| 2 | 16.789         | 12952282 | 50.84  | 471055 |

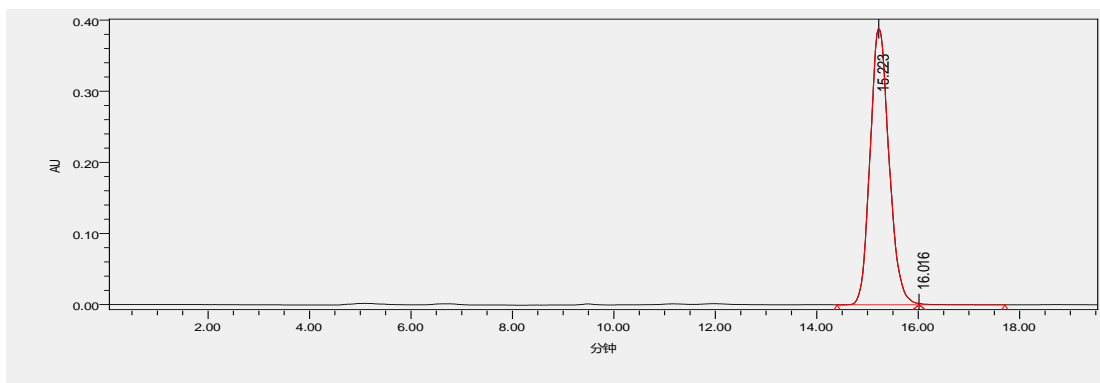

|   | Retention Time | Area     | % Area | Height |
|---|----------------|----------|--------|--------|
| 1 | 15.223         | 10066663 | 99.72  | 388252 |
| 2 | 16.016         | 28268    | 0.28   | 2008   |

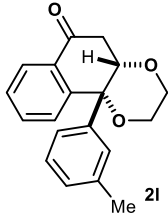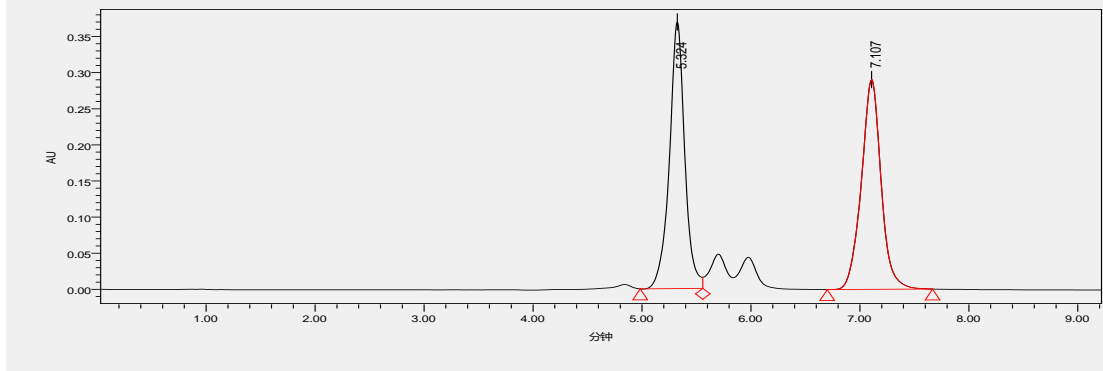

|   | Retention Time | Area    | % Area | Height |
|---|----------------|---------|--------|--------|
| 1 | 5.324          | 3612923 | 49.73  | 369369 |
| 2 | 7.107          | 3651713 | 50.27  | 290457 |

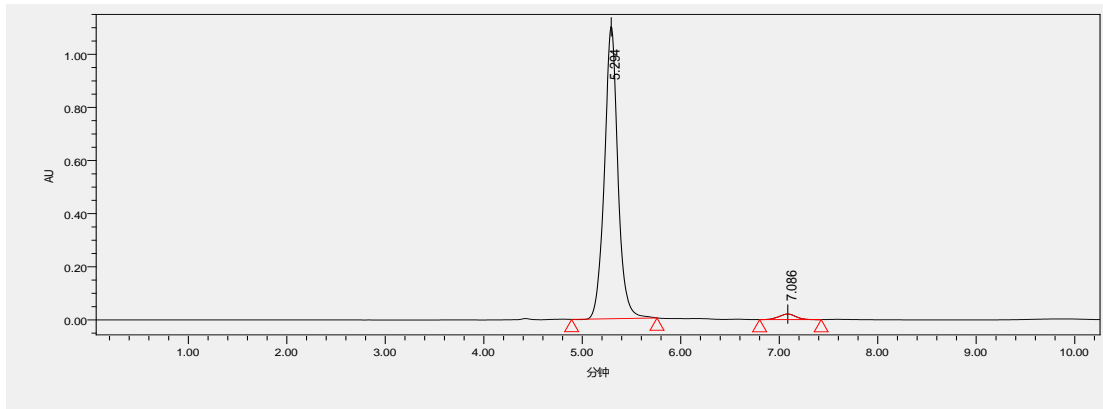

|   | Retention Time | Area     | % Area | Height  |
|---|----------------|----------|--------|---------|
| 1 | 5.294          | 10457631 | 97.67  | 1100575 |
| 2 | 7.086          | 249725   | 2.33   | 21077   |

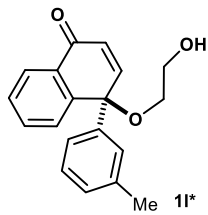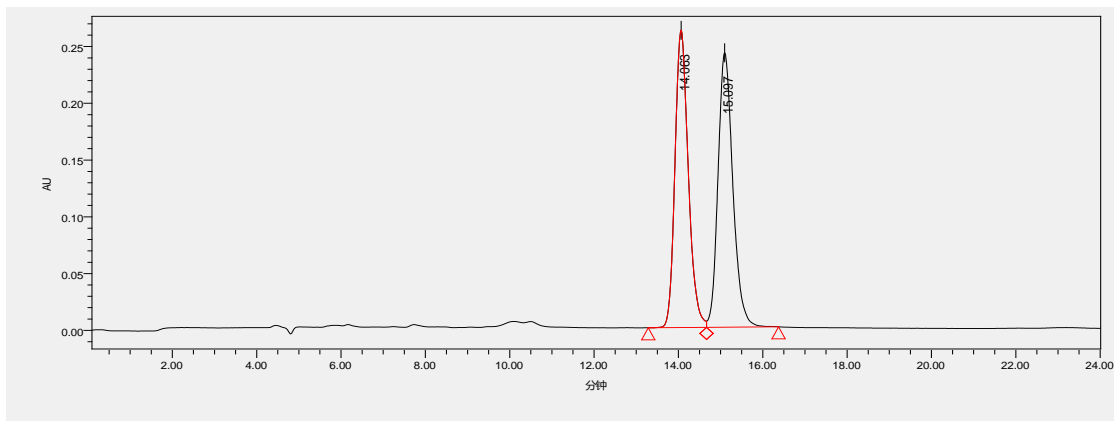

|   | Retention Time | Area    | % Area | Height |
|---|----------------|---------|--------|--------|
| 1 | 14.063         | 5753138 | 49.31  | 261870 |
| 2 | 15.097         | 5913461 | 50.69  | 241715 |

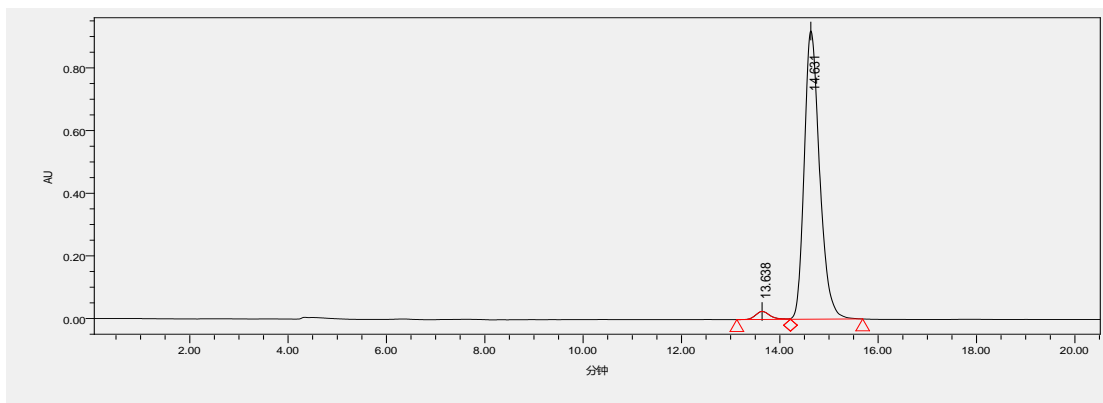

|   | Retention Time | Area     | % Area | Height |
|---|----------------|----------|--------|--------|
| 1 | 13.638         | 504893   | 2.46   | 25605  |
| 2 | 14.631         | 20045598 | 97.54  | 919988 |

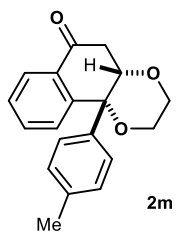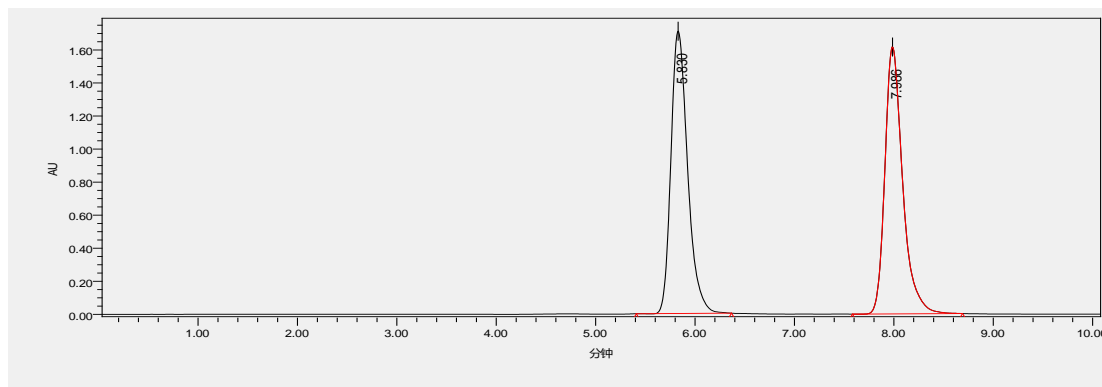

|   | Retention Time | Area     | % Area | Height  |
|---|----------------|----------|--------|---------|
| 1 | 5.830          | 19946734 | 49.85  | 1710062 |
| 2 | 7.986          | 20062821 | 50.15  | 1616793 |

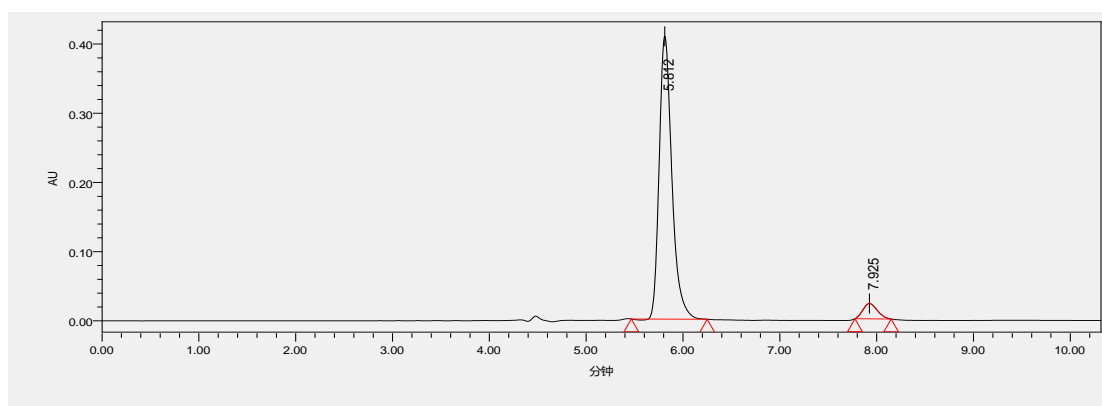

|   | Retention Time | Area    | % Area | Height |
|---|----------------|---------|--------|--------|
| 1 | 5.812          | 3742225 | 94.21  | 409634 |
| 2 | 7.925          | 229896  | 5.79   | 22253  |

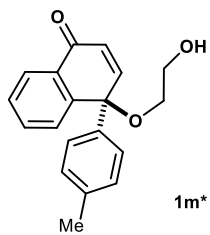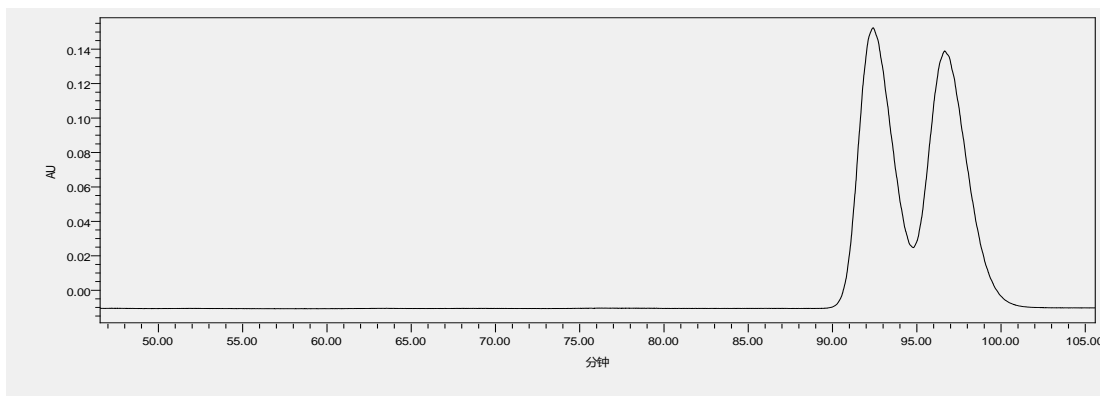

|   | Retention Time | Area     | % Area | Height |
|---|----------------|----------|--------|--------|
| 1 | 92.420         | 23545711 | 49.20  | 162865 |
| 2 | 96.659         | 24308521 | 50.80  | 149305 |

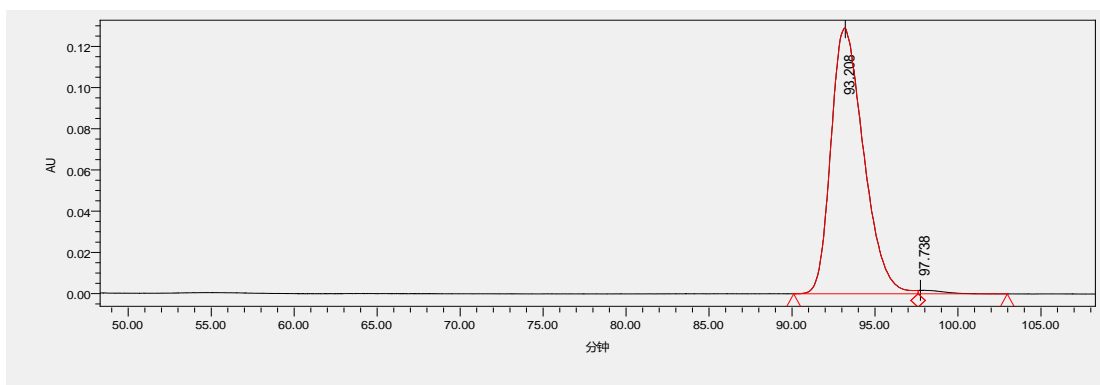

|   | Retention Time | Area     | % Area | Height |
|---|----------------|----------|--------|--------|
| 1 | 93.208         | 17676157 | 99.01  | 129082 |
| 2 | 97.738         | 176903   | 0.99   | 1741   |



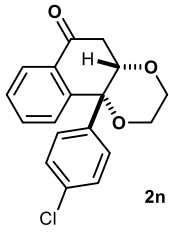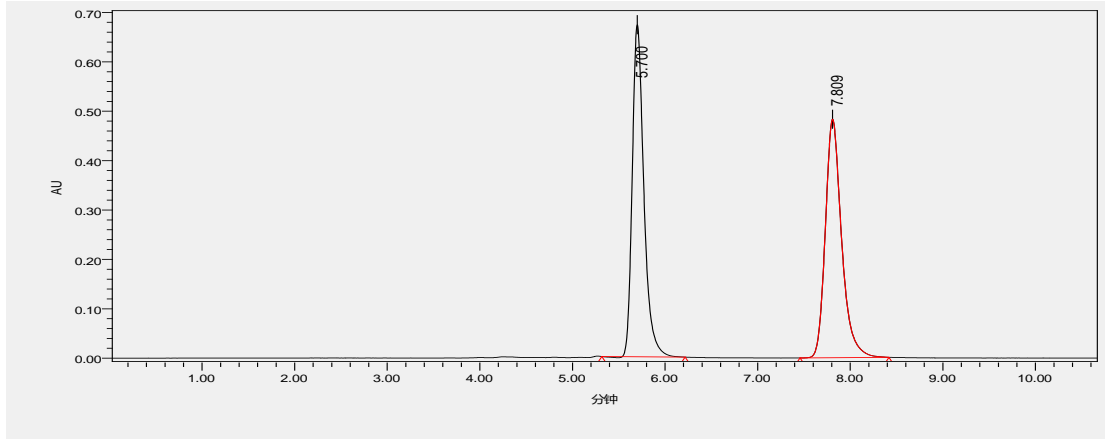

|   | Retention Time | Area    | % Area | Height |
|---|----------------|---------|--------|--------|
| 1 | 5.700          | 5887485 | 49.96  | 672319 |
| 2 | 7.809          | 5896554 | 50.04  | 482959 |

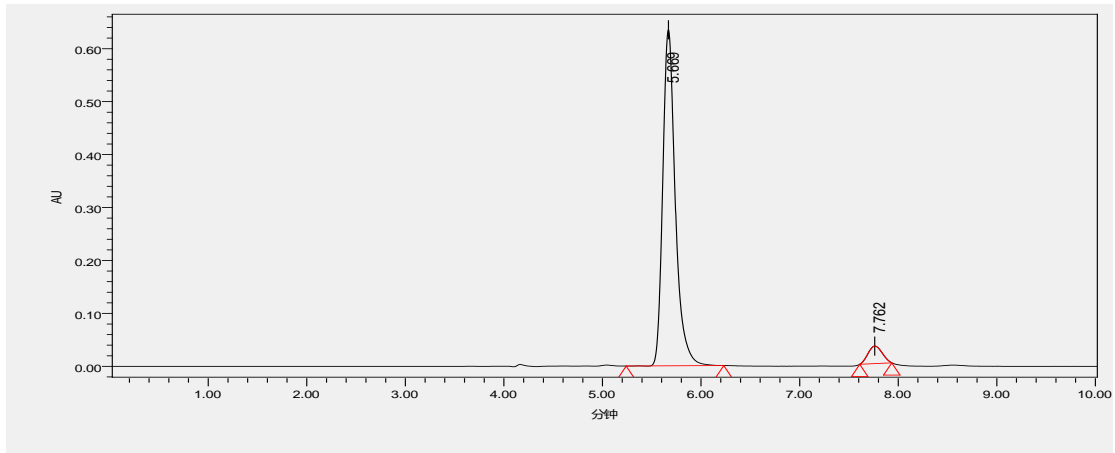

|   | Retention Time | Area    | % Area | Height |
|---|----------------|---------|--------|--------|
| 1 | 5.669          | 5621019 | 94.46  | 634566 |
| 2 | 7.762          | 329456  | 5.54   | 33158  |

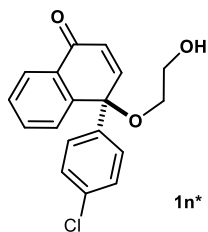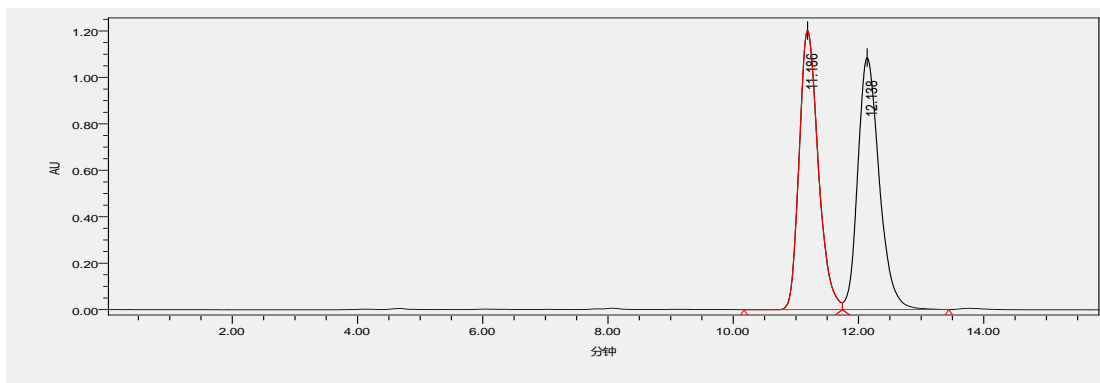

|   | Retention Time | Area     | % Area | Height  |
|---|----------------|----------|--------|---------|
| 1 | 11.186         | 25419153 | 49.63  | 1201796 |
| 2 | 12.138         | 25798144 | 50.37  | 1085309 |

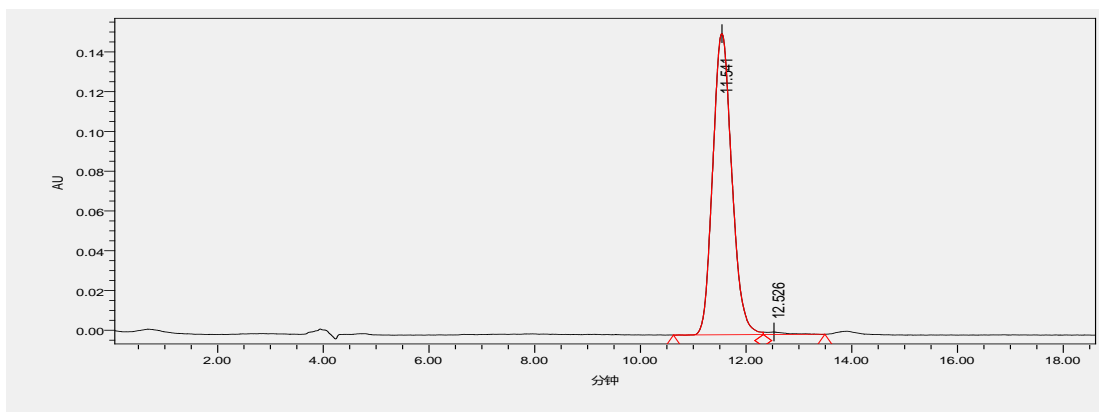

|   | Retention Time | Area    | % Area | Height |
|---|----------------|---------|--------|--------|
| 1 | 11.441         | 3802391 | 99.07  | 151472 |
| 2 | 12.426         | 35609   | 0.93   | 1263   |

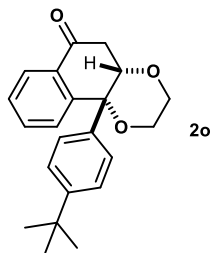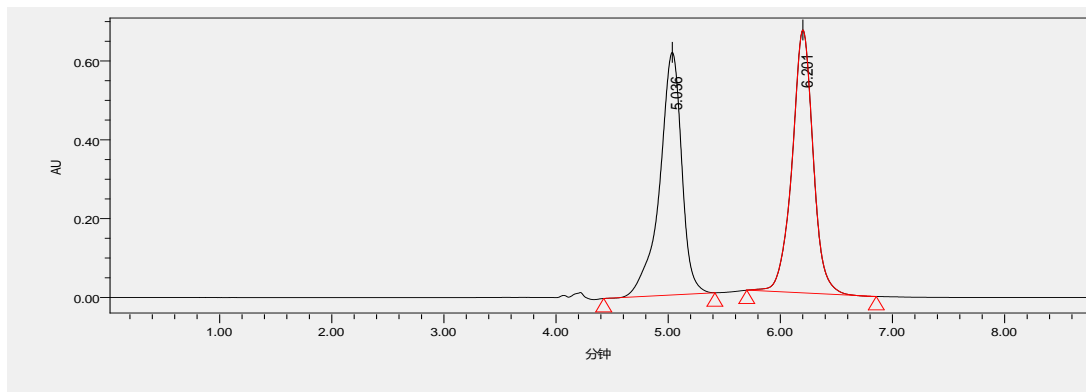

|   | Retention Time | Area    | % Area | Height |
|---|----------------|---------|--------|--------|
| 1 | 5.036          | 7888890 | 49.69  | 576812 |
| 2 | 6.201          | 7986780 | 50.31  | 621520 |

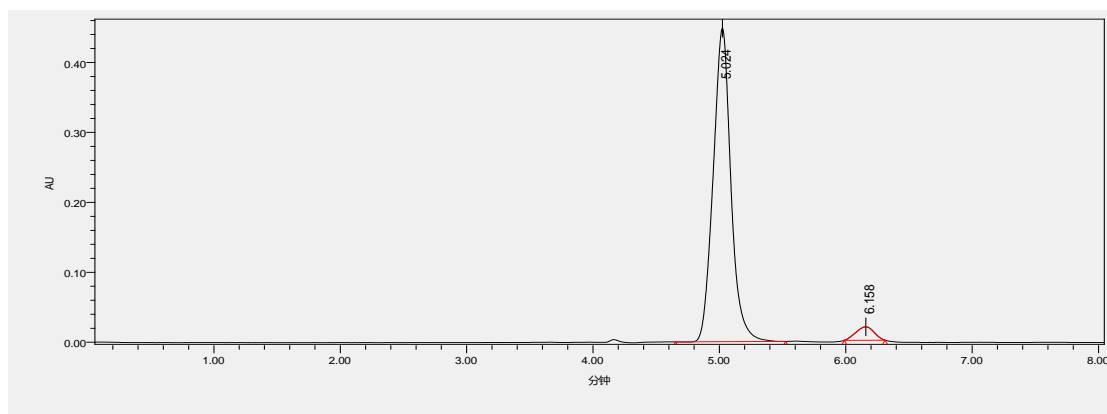

|   | Retention Time | Area    | % Area | Height |
|---|----------------|---------|--------|--------|
| 1 | 5.024          | 4216150 | 96.59  | 432394 |
| 2 | 6.158          | 148729  | 3.41   | 16480  |

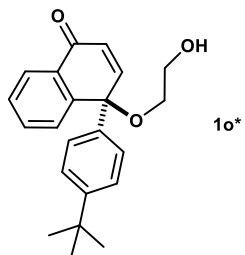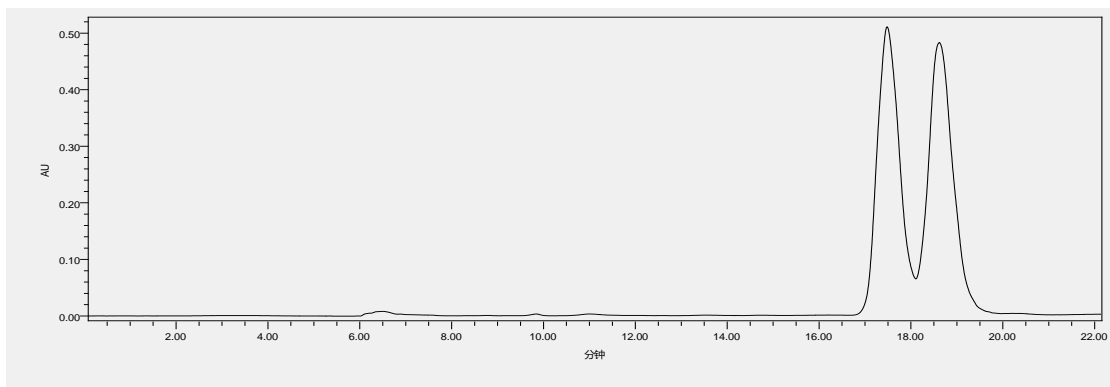

|   | Retention Time | Area     | % Area | Height |
|---|----------------|----------|--------|--------|
| 1 | 17.481         | 17312401 | 49.09  | 509022 |
| 2 | 18.618         | 17953478 | 50.91  | 480141 |

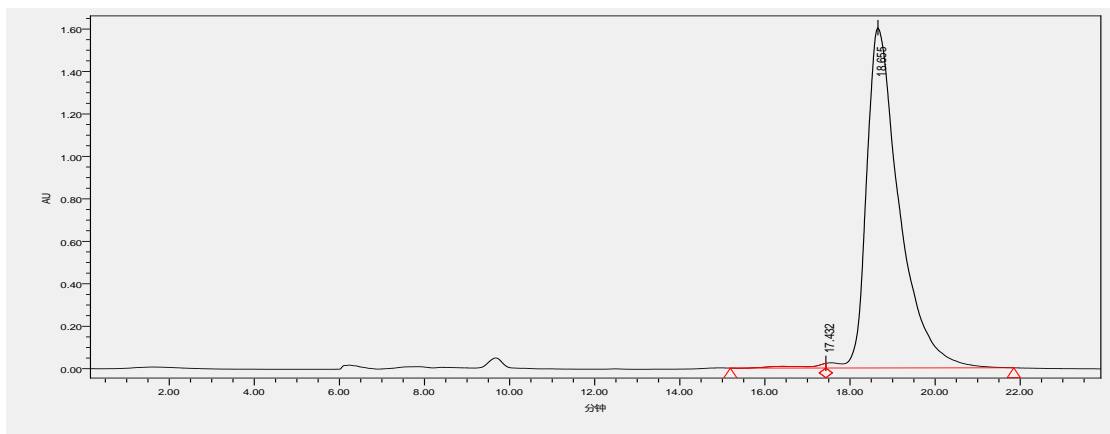

|   | Retention Time | Area     | % Area | Height  |
|---|----------------|----------|--------|---------|
| 1 | 17.432         | 766127   | 0.89   | 21821   |
| 2 | 18.655         | 85647064 | 99.11  | 1602580 |

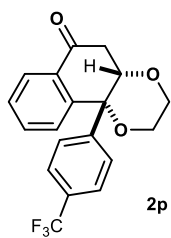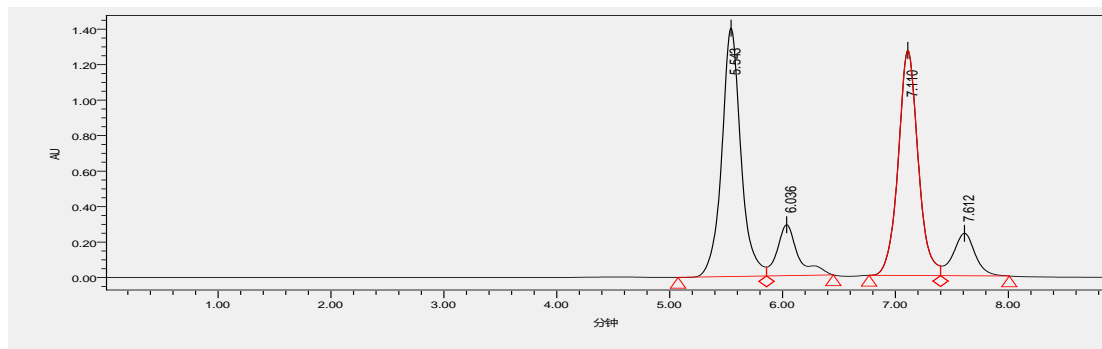

|   | Retention Time | Area     | % Area | Height  |
|---|----------------|----------|--------|---------|
| 1 | 5.545          | 18311023 | 43.49  | 1573987 |
| 2 | 6.038          | 2883061  | 6.85   | 261312  |
| 3 | 7.111          | 17780099 | 42.23  | 1439731 |
| 4 | 7.613          | 3130791  | 7.44   | 238026  |

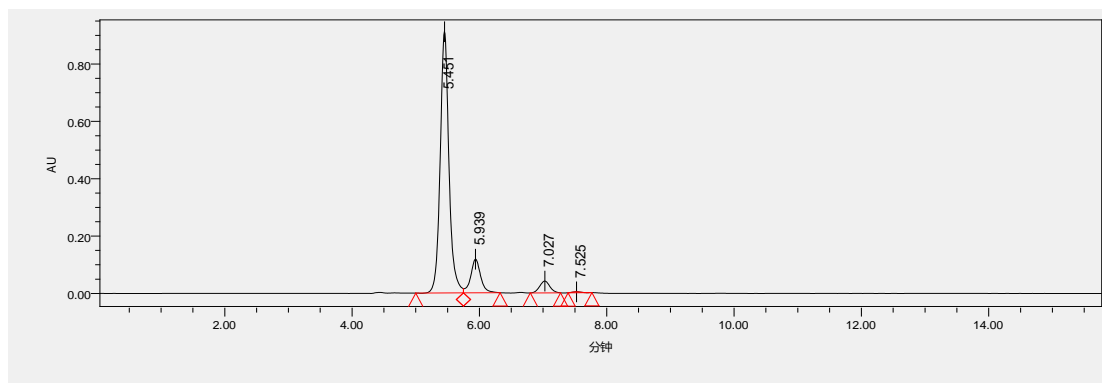

|   | Retention Time | Area    | % Area | Height |
|---|----------------|---------|--------|--------|
| 1 | 5.451          | 8359377 | 87.20  | 897518 |
| 2 | 5.939          | 853282  | 8.90   | 98643  |
| 3 | 7.027          | 344601  | 3.59   | 35782  |
| 4 | 7.525          | 29602   | 0.31   | 3269   |

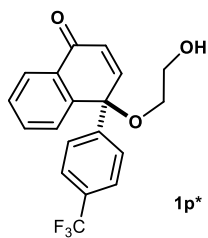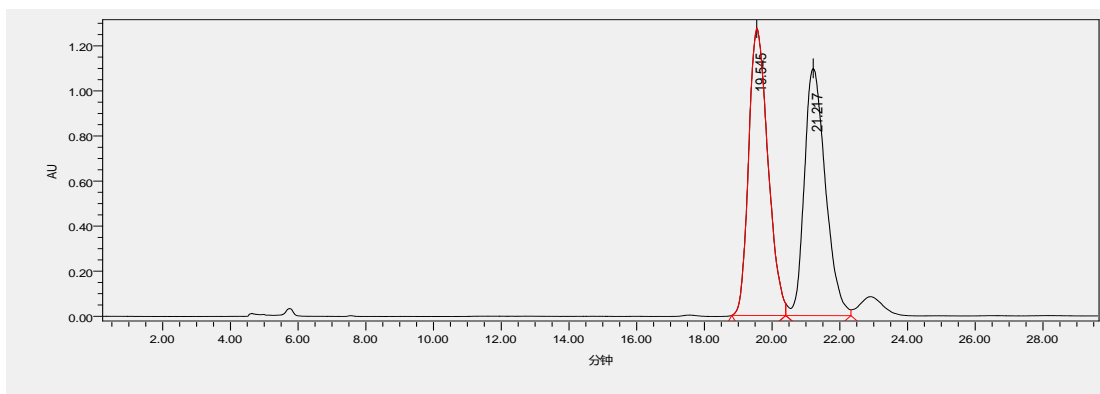

|   | Retention Time | Area     | % Area | Height  |
|---|----------------|----------|--------|---------|
| 1 | 19.545         | 50375957 | 51.35  | 1275910 |
| 2 | 21.217         | 47733121 | 48.65  | 1097567 |

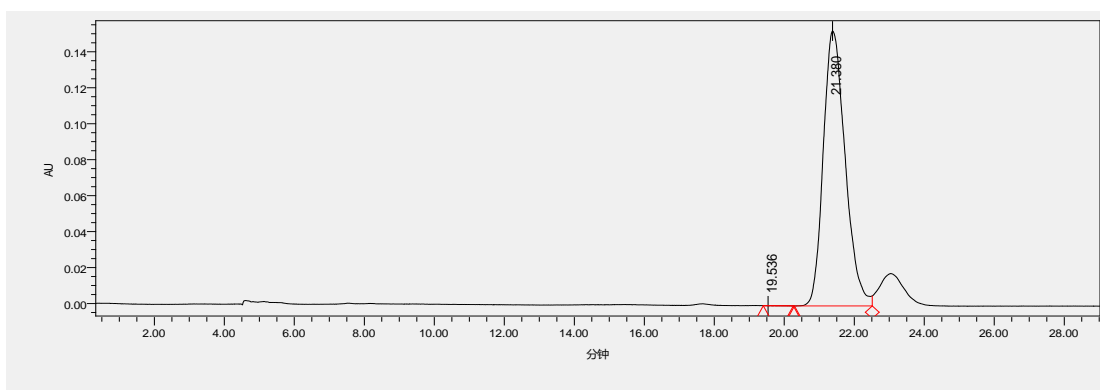

|   | Retention Time | Area    | % Area | Height |
|---|----------------|---------|--------|--------|
| 1 | 19.536         | 25148   | 0.36   | 307    |
| 2 | 21.380         | 6953705 | 99.64  | 142758 |

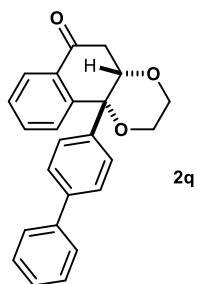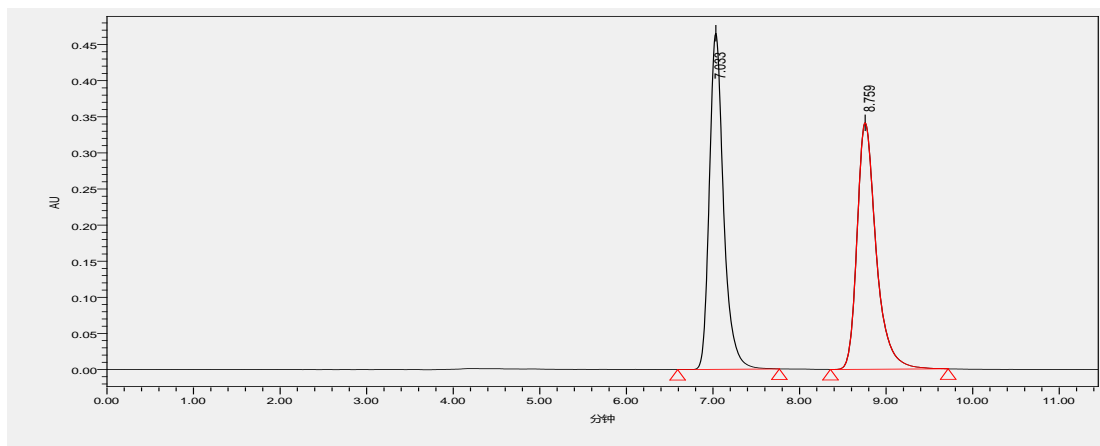

|   | Retention Time | Area    | % Area | Height |
|---|----------------|---------|--------|--------|
| 1 | 7.033          | 5301981 | 50.30  | 465316 |
| 2 | 8.759          | 5238657 | 49.70  | 341384 |

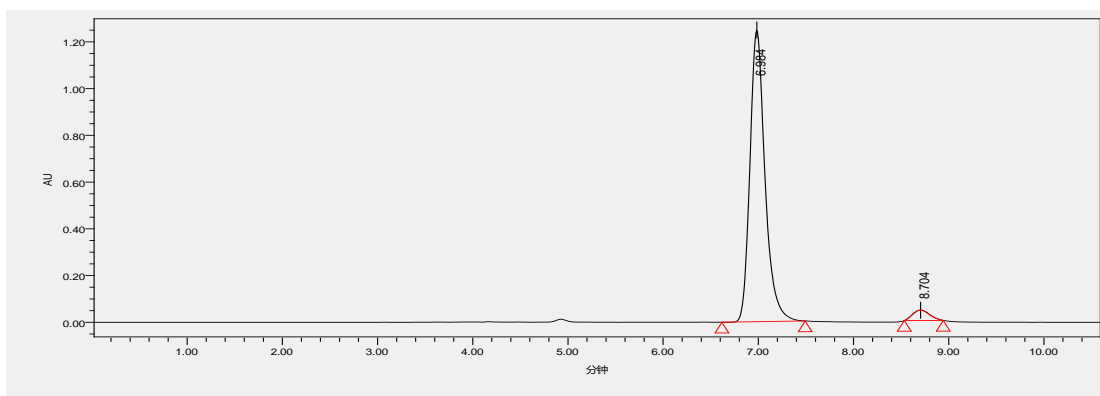

|   | Retention Time | Area     | % Area | Height  |
|---|----------------|----------|--------|---------|
| 1 | 6.984          | 13727764 | 96.16  | 1248112 |
| 2 | 8.704          | 548800   | 3.84   | 44542   |

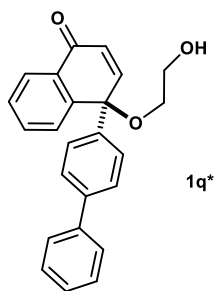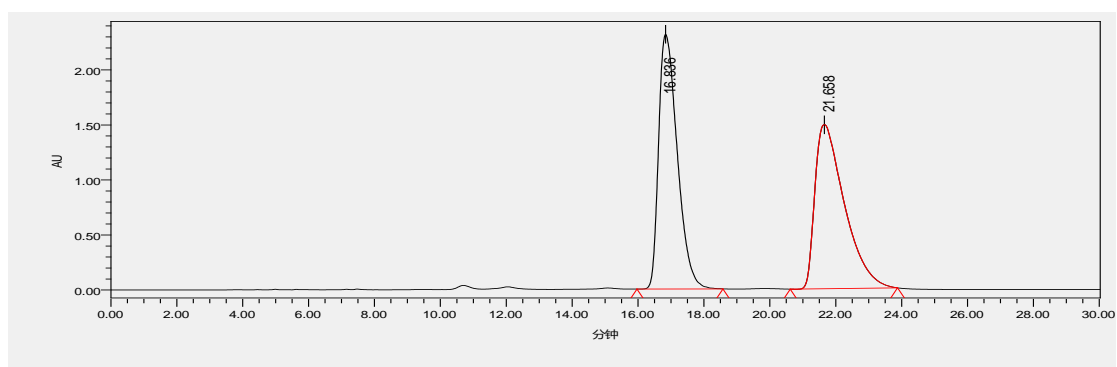

|   | Retention Time | Area     | % Area | Height  |
|---|----------------|----------|--------|---------|
| 1 | 16.836         | 91153126 | 49.60  | 2313954 |
| 2 | 21.658         | 92606661 | 50.40  | 1490444 |

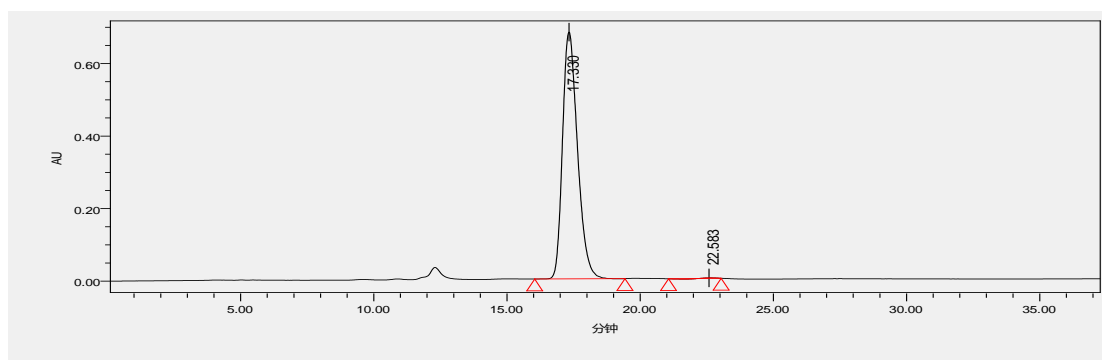

|   | Retention Time | Area     | % Area | Height |
|---|----------------|----------|--------|--------|
| 1 | 17.330         | 26577006 | 99.62  | 680463 |
| 2 | 22.583         | 102385   | 0.38   | 1431   |



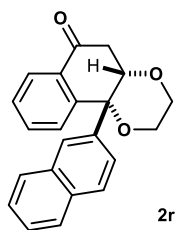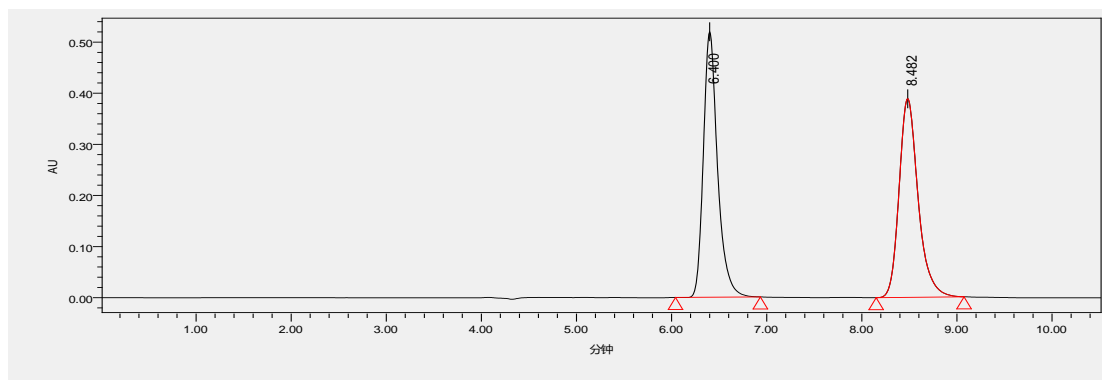

|   | Retention Time | Area    | % Area | Height |
|---|----------------|---------|--------|--------|
| 1 | 6.400          | 5377990 | 49.86  | 519633 |
| 2 | 8.482          | 5407709 | 50.14  | 388874 |

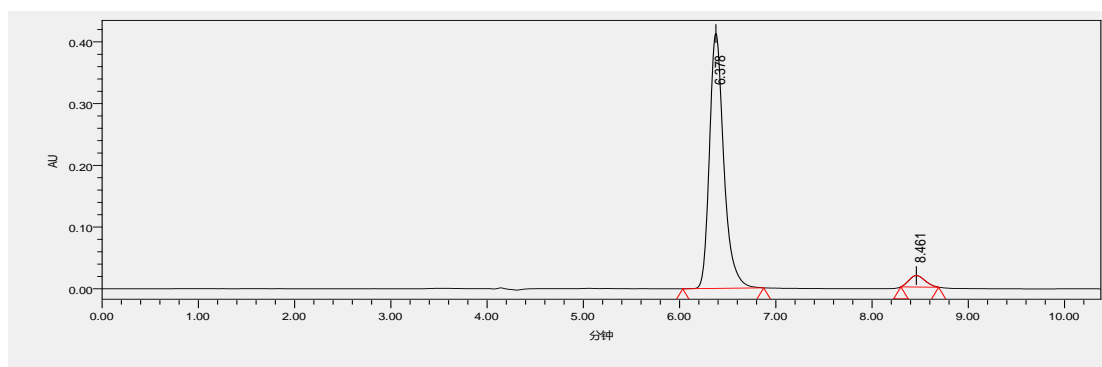

|   | Retention Time | Area    | % Area | Height |
|---|----------------|---------|--------|--------|
| 1 | 6.385          | 9409661 | 95.58  | 912545 |
| 2 | 8.465          | 435487  | 4.42   | 38559  |

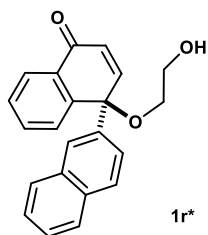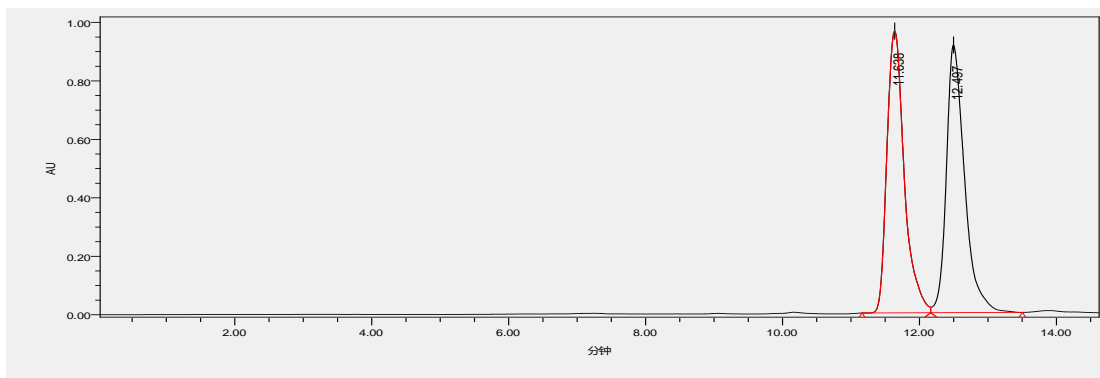

|   | Retention Time | Area     | % Area | Height |
|---|----------------|----------|--------|--------|
| 1 | 11.638         | 16970801 | 50.03  | 963592 |
| 2 | 12.497         | 16949367 | 49.97  | 915480 |

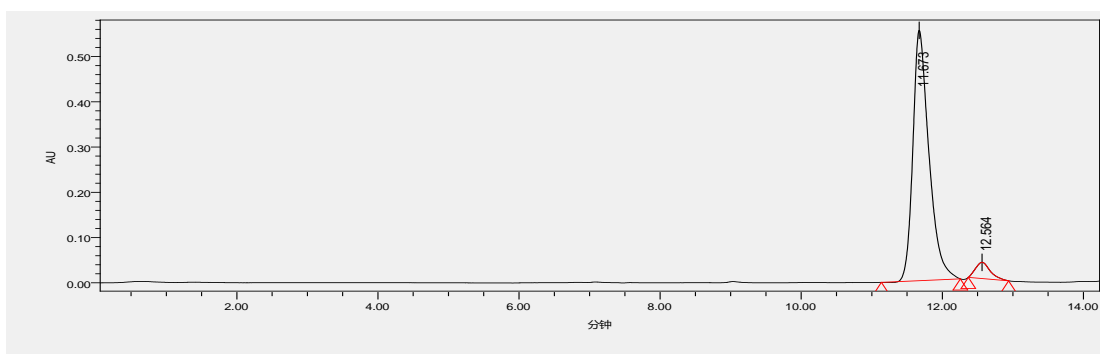

|   | Retention Time | Area    | % Area | Height |
|---|----------------|---------|--------|--------|
| 1 | 11.673         | 8781843 | 94.40  | 553104 |
| 2 | 12.564         | 520485  | 5.60   | 35916  |

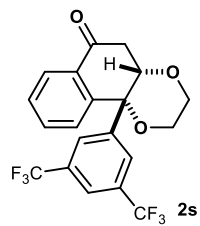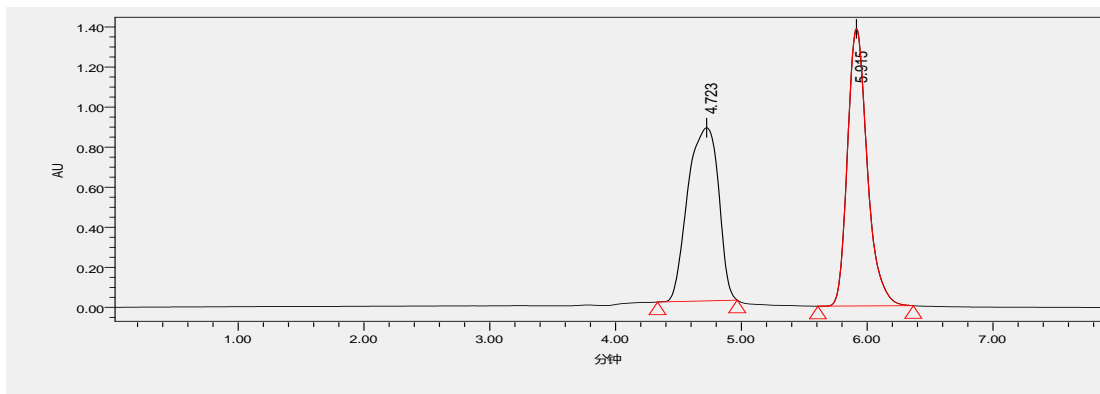

|   | Retention Time | Area     | % Area | Height  |
|---|----------------|----------|--------|---------|
| 1 | 4.723          | 14690496 | 49.20  | 864573  |
| 2 | 5.915          | 15169531 | 50.80  | 1385062 |

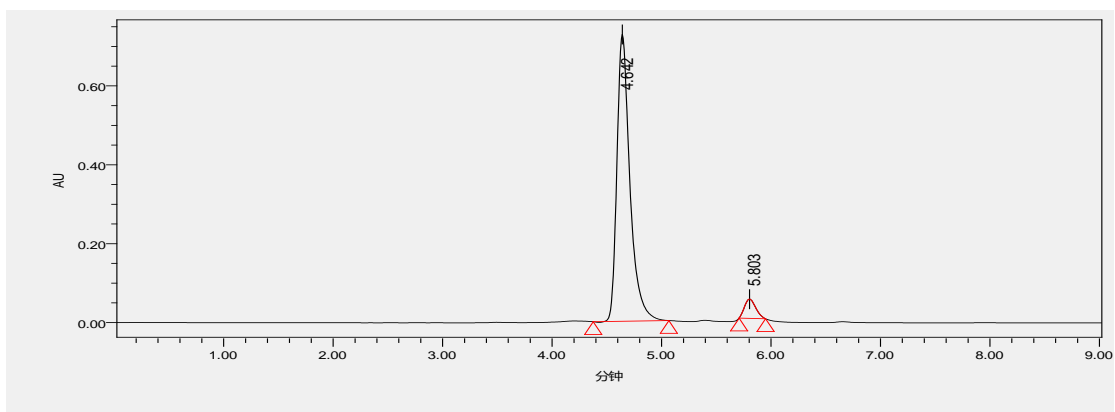

|   | Retention Time | Area    | % Area | Height |
|---|----------------|---------|--------|--------|
| 1 | 4.642          | 6006953 | 94.51  | 727130 |
| 2 | 5.803          | 348976  | 5.49   | 49029  |

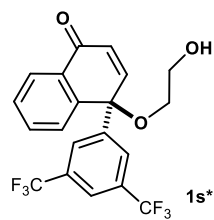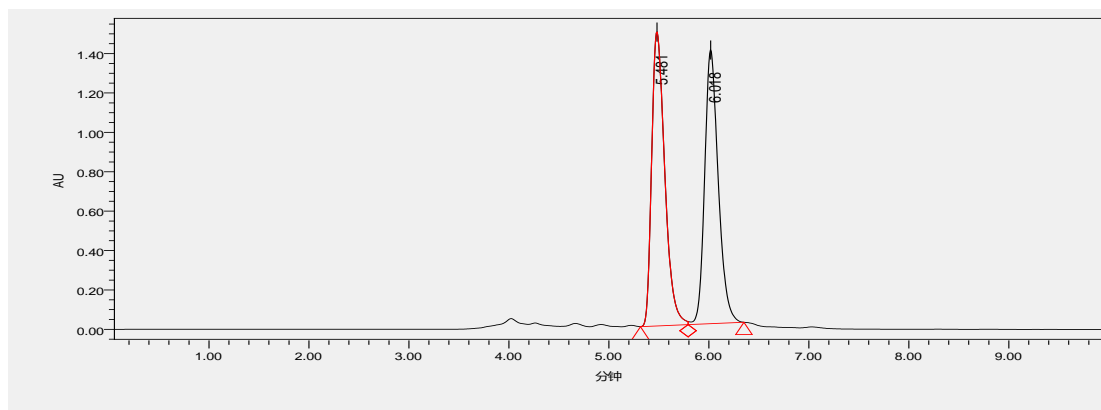

|   | Retention Time | Area     | % Area | Height  |
|---|----------------|----------|--------|---------|
| 1 | 5.481          | 13630022 | 50.87  | 1493901 |
| 2 | 6.018          | 13162433 | 49.13  | 1391559 |

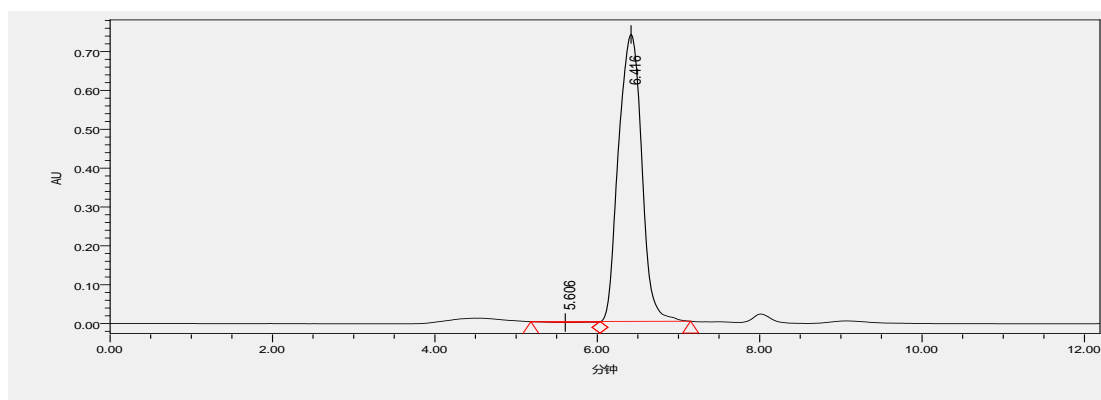

|   | Retention Time | Area     | % Area | Height |
|---|----------------|----------|--------|--------|
| 1 | 5.406          | 78809    | 0.54   | -2261  |
| 2 | 6.116          | 14648247 | 99.46  | 738413 |

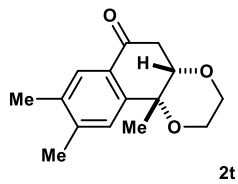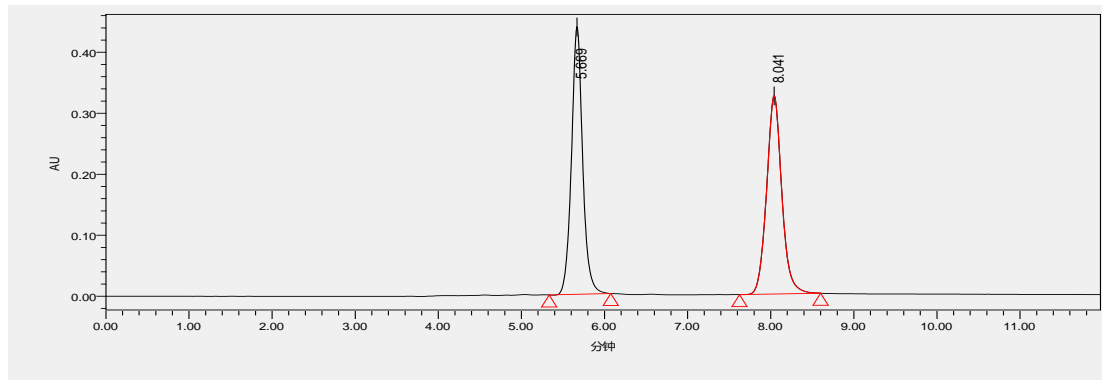

|   | Retention Time | Area    | % Area | Height |
|---|----------------|---------|--------|--------|
| 1 | 5.669          | 4106523 | 49.85  | 439171 |
| 2 | 8.041          | 4130925 | 50.15  | 324988 |

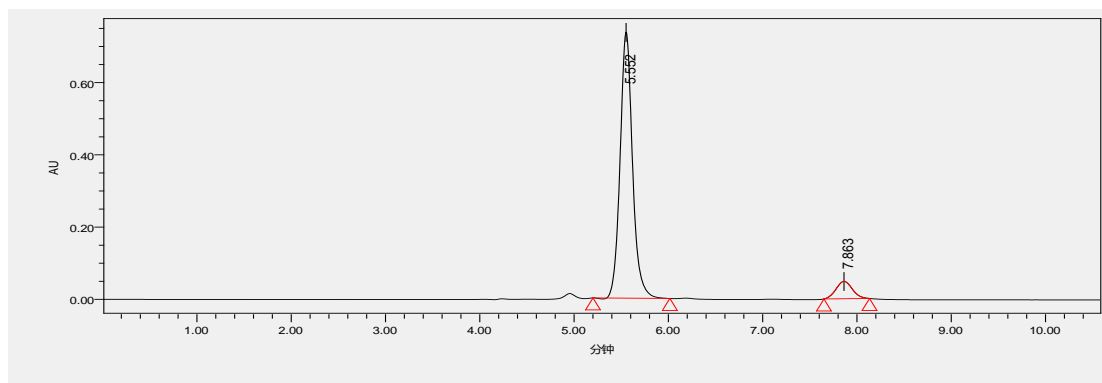

|   | Retention Time | Area    | % Area | Height |
|---|----------------|---------|--------|--------|
| 1 | 5.552          | 6757231 | 93.51  | 737092 |
| 2 | 7.863          | 468771  | 6.49   | 43497  |

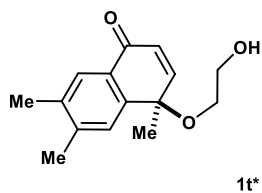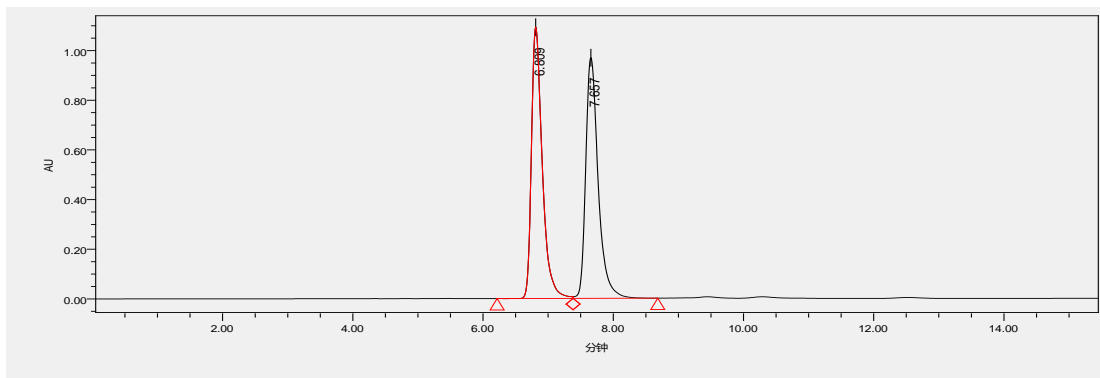

|   | Retention Time | Area     | % Area | Height  |
|---|----------------|----------|--------|---------|
| 1 | 6.809          | 12610145 | 49.46  | 1093088 |
| 2 | 7.657          | 12884301 | 50.54  | 969198  |

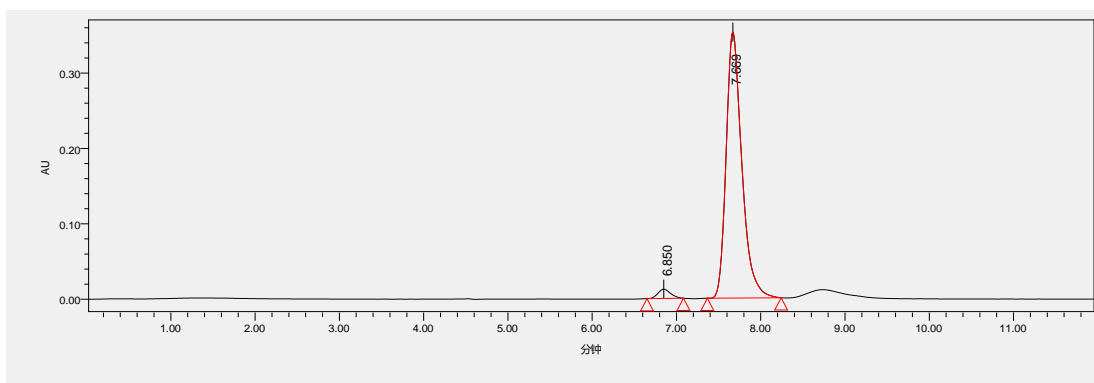

|   | Retention Time | Area    | % Area | Height |
|---|----------------|---------|--------|--------|
| 1 | 6.850          | 113427  | 2.43   | 11705  |
| 2 | 7.669          | 4556574 | 97.57  | 353028 |

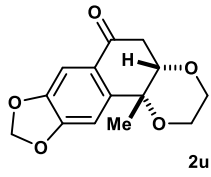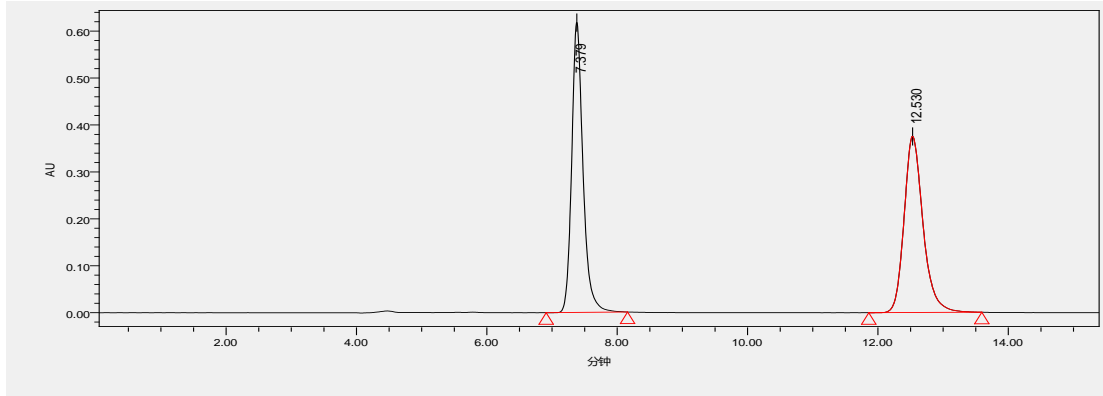

|   | Retention Time | Area    | % Area | Height |
|---|----------------|---------|--------|--------|
| 1 | 7.379          | 7457765 | 49.62  | 618631 |
| 2 | 12.530         | 7571443 | 50.38  | 375490 |

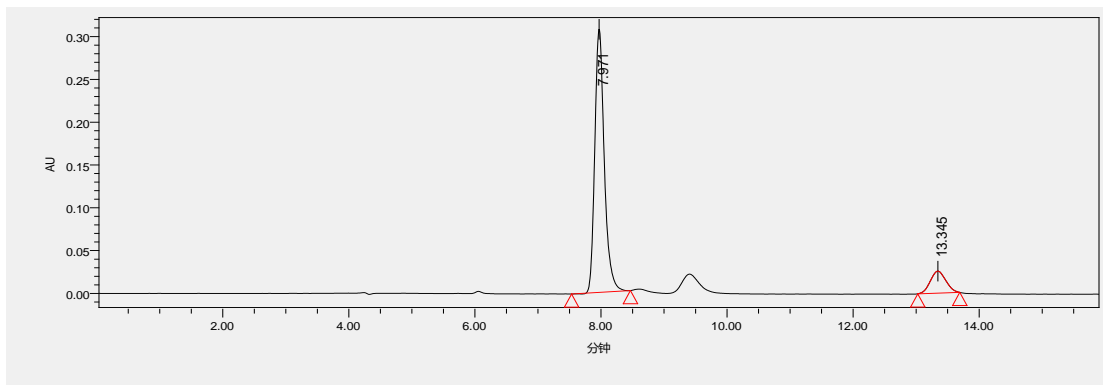

|   | Retention Time | Area    | % Area | Height |
|---|----------------|---------|--------|--------|
| 1 | 7.971          | 3231115 | 93.39  | 307684 |
| 2 | 13.345         | 228668  | 6.61   | 17978  |

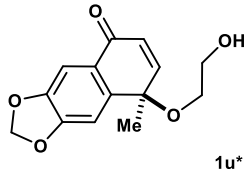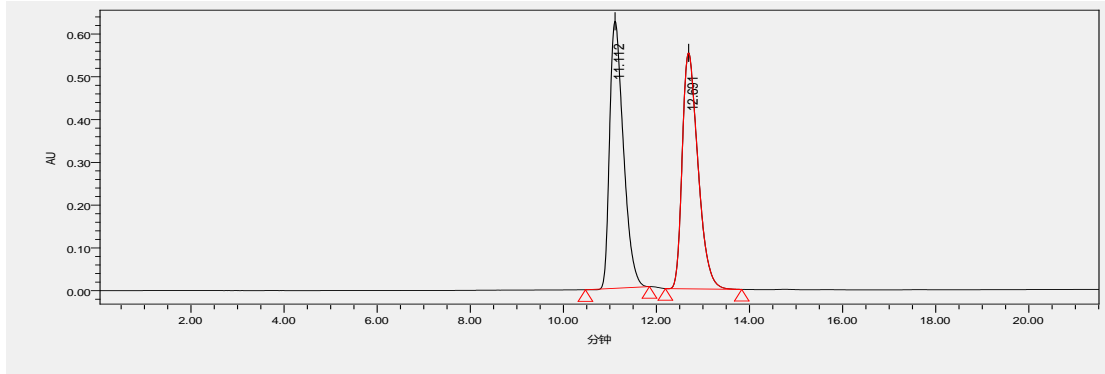

|   | Retention Time | Area     | % Area | Height |
|---|----------------|----------|--------|--------|
| 1 | 11.112         | 12830963 | 49.74  | 624506 |
| 2 | 12.691         | 12963842 | 50.26  | 551671 |

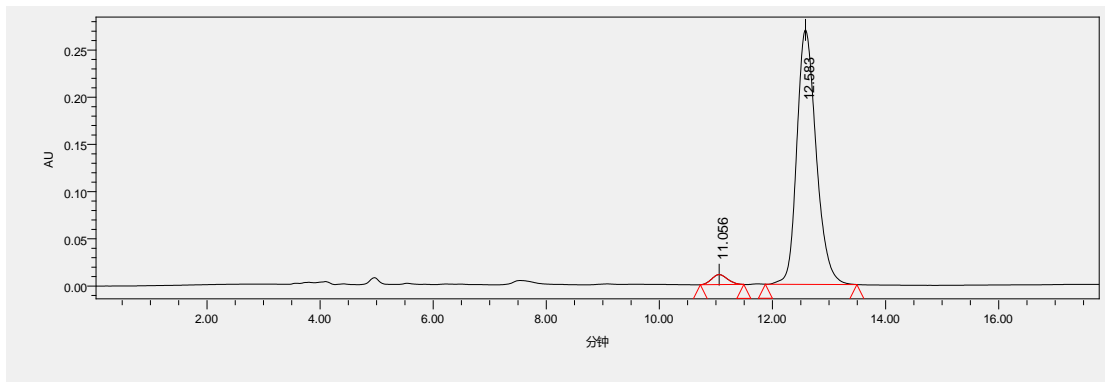

|   | Retention Time | Area    | % Area | Height |
|---|----------------|---------|--------|--------|
| 1 | 11.056         | 206758  | 3.13   | 10619  |
| 2 | 12.583         | 6406629 | 96.87  | 269520 |



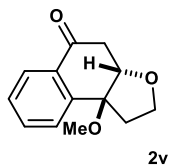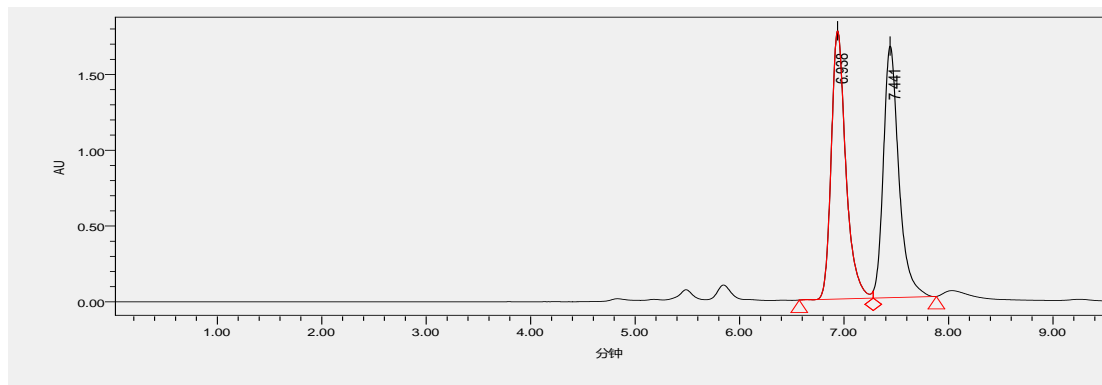

|   | Retention Time | Area     | % Area | Height  |
|---|----------------|----------|--------|---------|
| 1 | 6.938          | 17228996 | 50.22  | 1769761 |
| 2 | 7.441          | 17079322 | 49.78  | 1660004 |

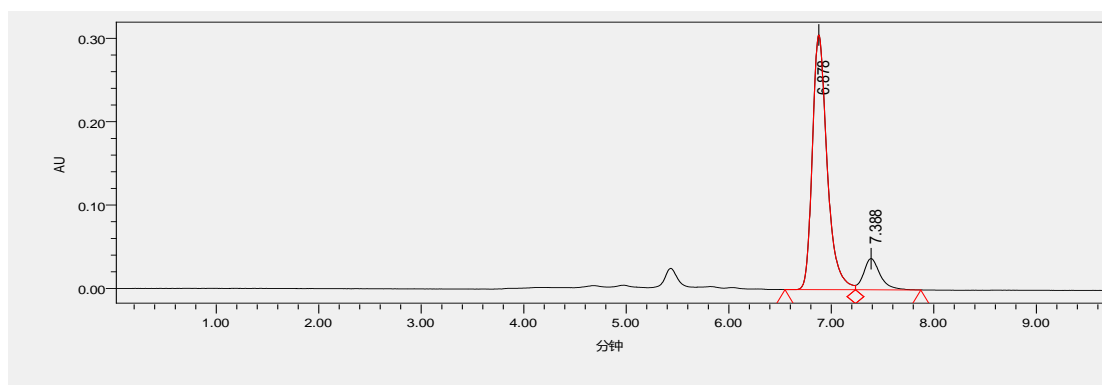

|   | Retention Time | Area    | % Area | Height |
|---|----------------|---------|--------|--------|
| 1 | 6.878          | 3068324 | 87.96  | 305374 |
| 2 | 6.878          | 420041  | 12.04  | 37427  |

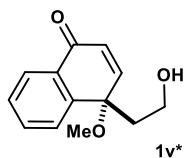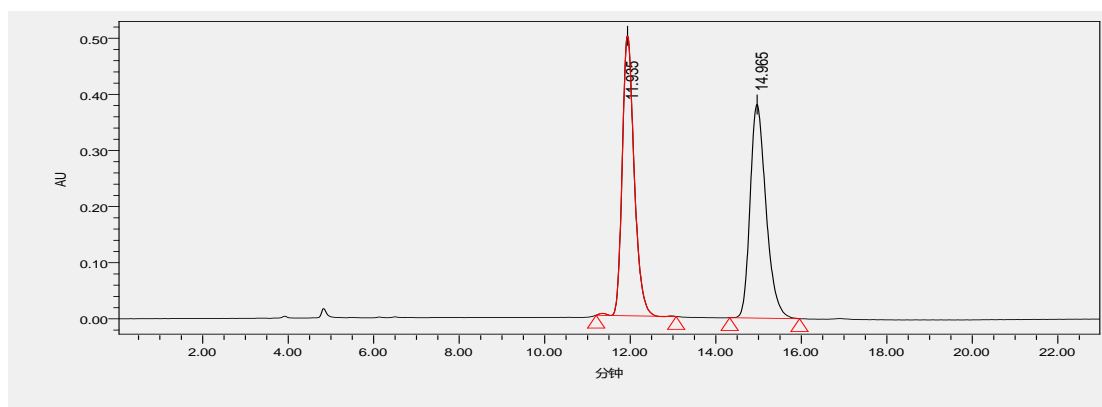

|   | Retention Time | Area    | % Area | Height |
|---|----------------|---------|--------|--------|
| 1 | 11.935         | 9649870 | 49.81  | 498448 |
| 2 | 14.965         | 9722745 | 50.19  | 379512 |

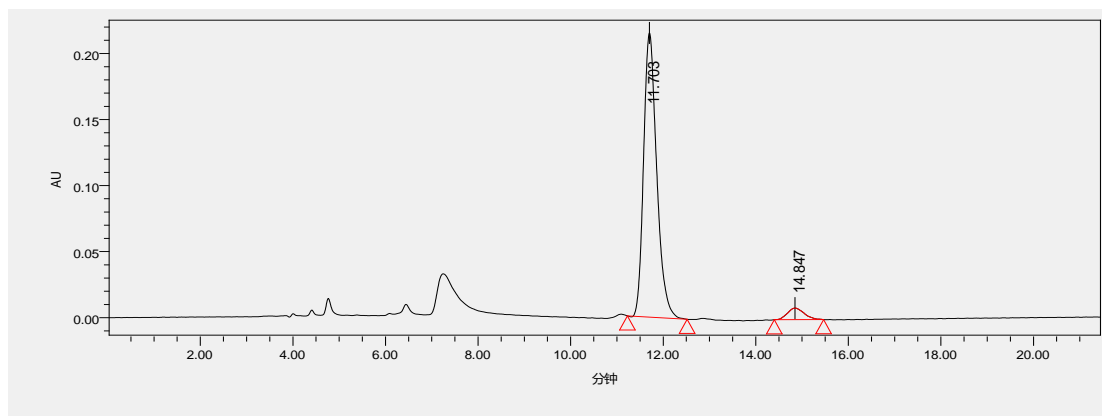

|   | Retention Time | Area    | % Area | Height |
|---|----------------|---------|--------|--------|
| 1 | 11.703         | 4336177 | 95.93  | 223768 |
| 2 | 14.846         | 184106  | 4.07   | 9017   |

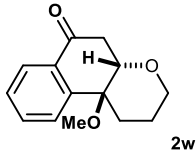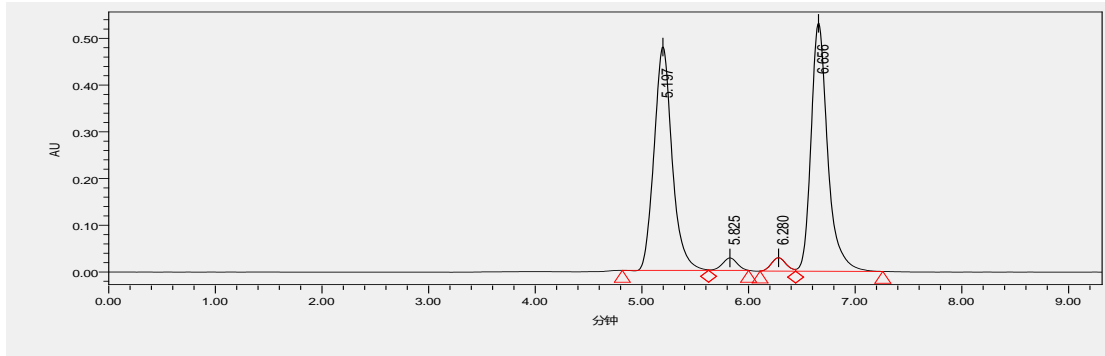

|   | Retention Time | Area    | % Area | Height |
|---|----------------|---------|--------|--------|
| 1 | 5.197          | 5624645 | 47.31  | 478471 |
| 2 | 5.825          | 251144  | 2.11   | 26492  |
| 3 | 6.280          | 273045  | 2.30   | 28787  |
| 4 | 6.656          | 5739292 | 48.28  | 531257 |

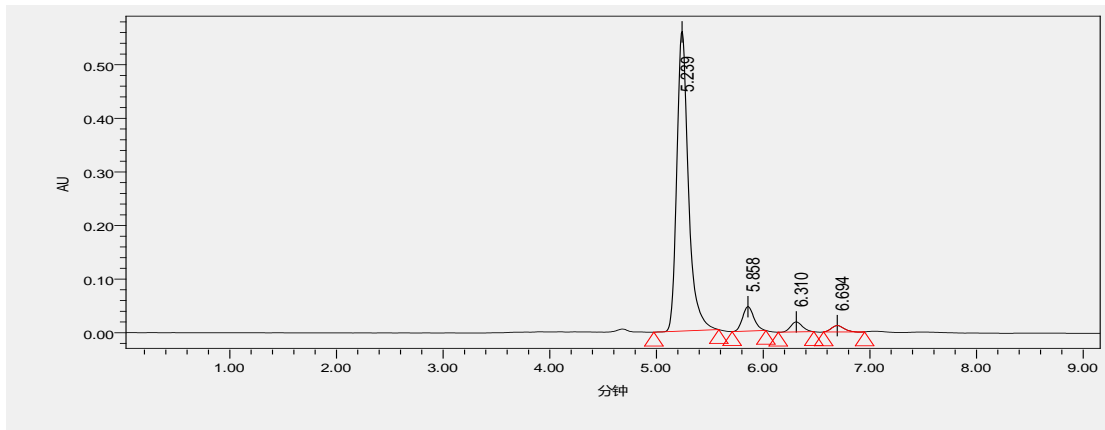

|   | Retention Time | Area    | % Area | Height |
|---|----------------|---------|--------|--------|
| 1 | 5.239          | 4231981 | 87.96  | 559794 |
| 2 | 5.858          | 337935  | 7.02   | 45765  |
| 3 | 6.310          | 144260  | 3.00   | 18768  |
| 4 | 6.694          | 96946   | 2.02   | 11869  |

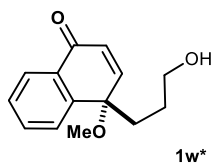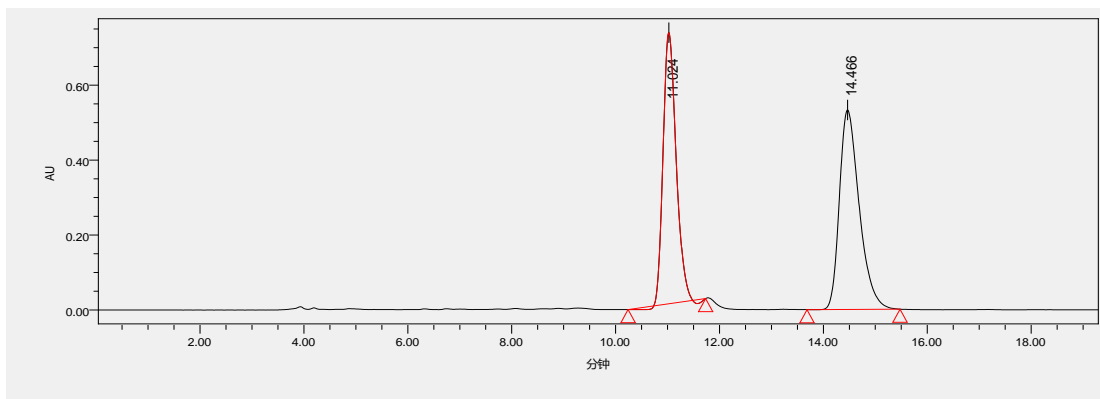

|   | Retention Time | Area     | % Area | Height |
|---|----------------|----------|--------|--------|
| 1 | 11.024         | 13633418 | 49.14  | 734467 |
| 2 | 14.466         | 14112046 | 50.86  | 532734 |

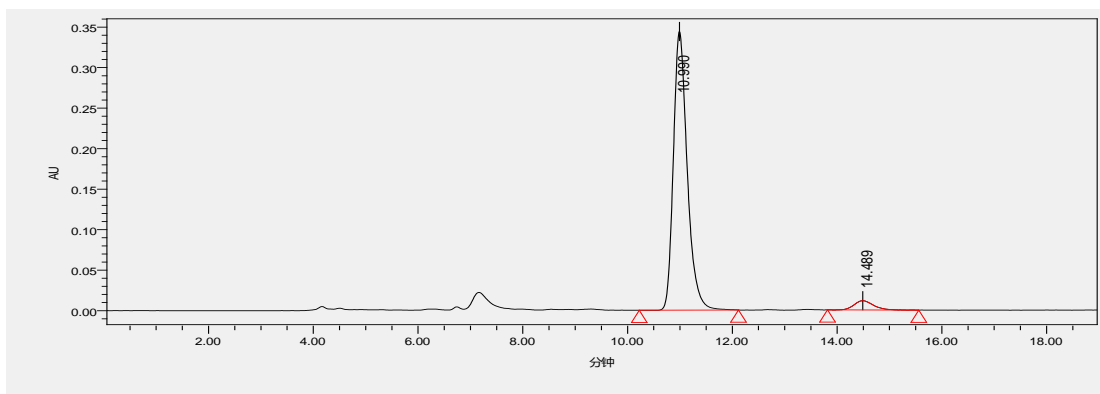

|   | Retention Time | Area    | % Area | Height |
|---|----------------|---------|--------|--------|
| 1 | 10.990         | 6309947 | 95.54  | 343953 |
| 2 | 14.489         | 294791  | 4.46   | 11421  |

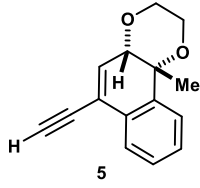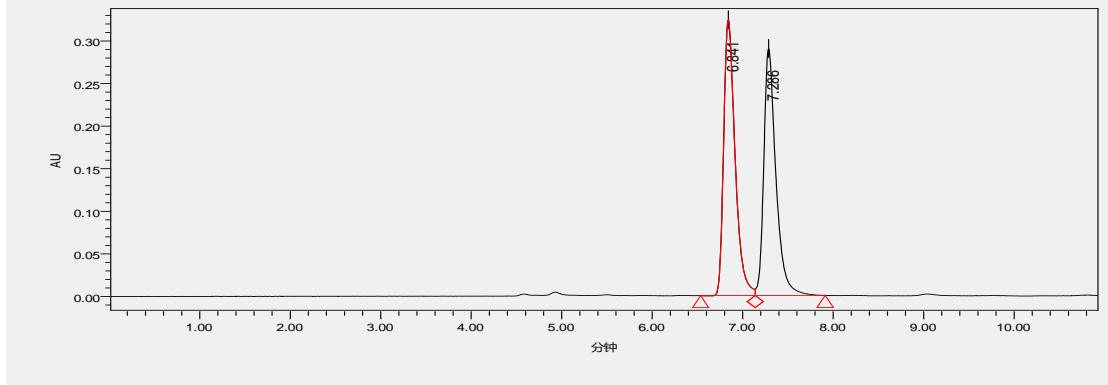

|   | Retention Time | Area    | % Area | Height |
|---|----------------|---------|--------|--------|
| 1 | 6.841          | 2843513 | 51.33  | 323598 |
| 2 | 7.286          | 2696349 | 48.67  | 289795 |

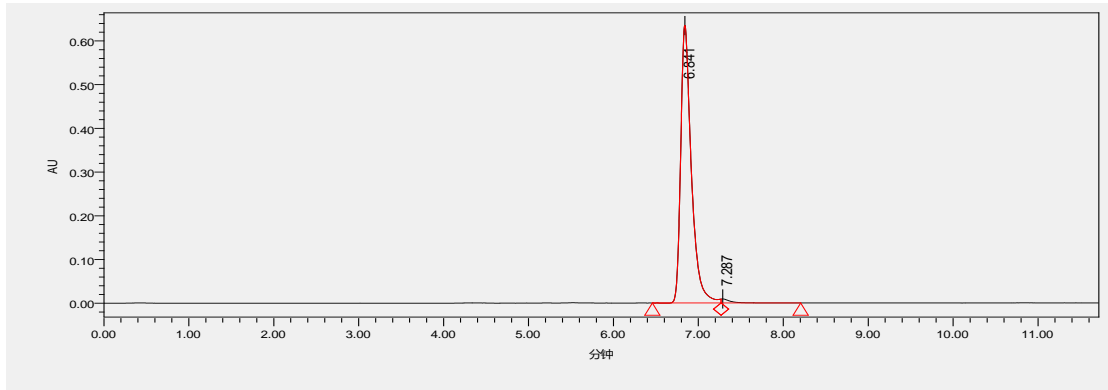

|   | Retention Time | Area    | % Area | Height |
|---|----------------|---------|--------|--------|
| 1 | 6.841          | 5536692 | 98.80  | 634879 |
| 2 | 7.287          | 67431   | 1.20   | 9216   |

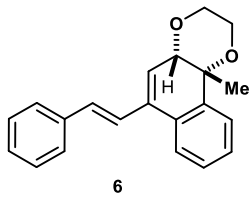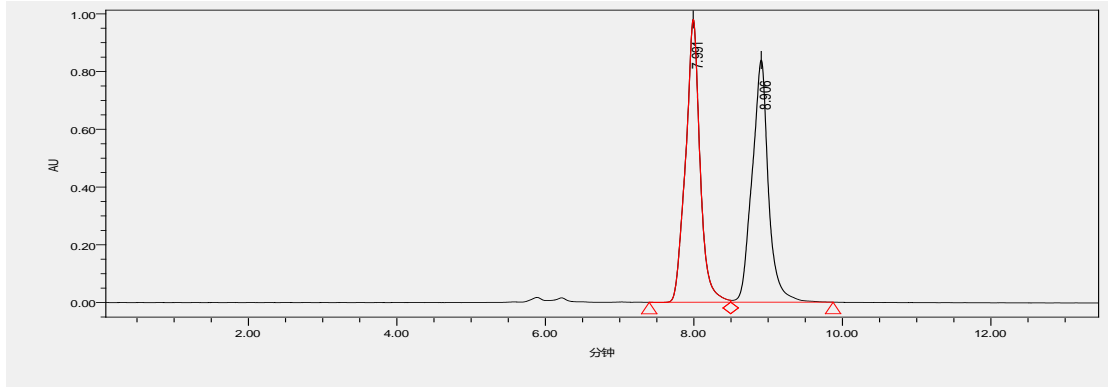

|   | Retention Time | Area     | % Area | Height |
|---|----------------|----------|--------|--------|
| 1 | 7.991          | 13265788 | 50.89  | 979185 |
| 2 | 8.906          | 12800071 | 49.11  | 838523 |

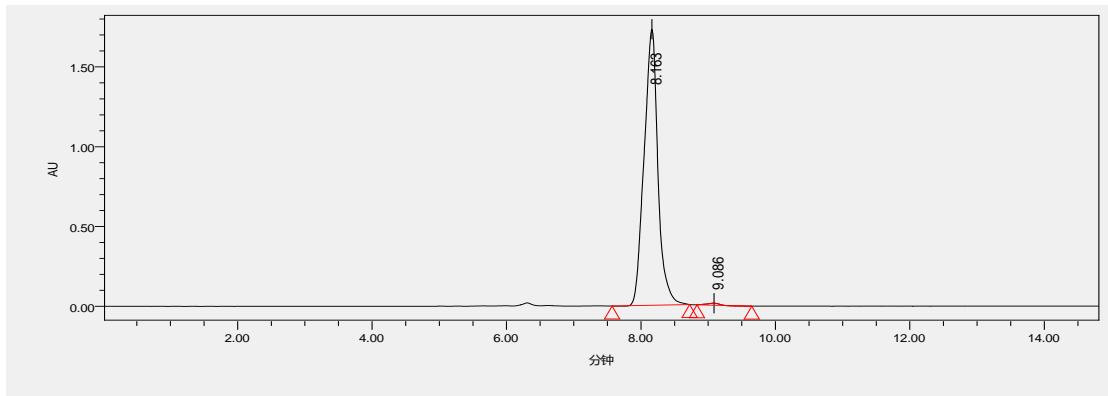

|   | Retention Time | Area     | % Area | Height  |
|---|----------------|----------|--------|---------|
| 1 | 8.163          | 24740370 | 99.26  | 1729693 |
| 2 | 9.086          | 185567   | 0.74   | 12764   |

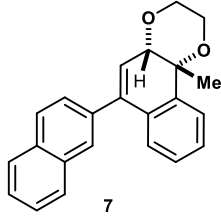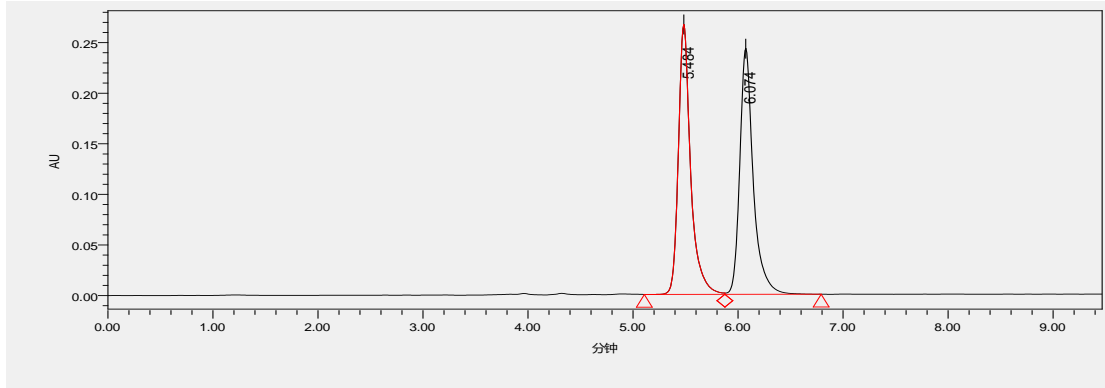

|   | Retention Time | Area    | % Area | Height |
|---|----------------|---------|--------|--------|
| 1 | 5.484          | 2163121 | 49.98  | 266753 |
| 2 | 6.074          | 2164874 | 50.02  | 242984 |

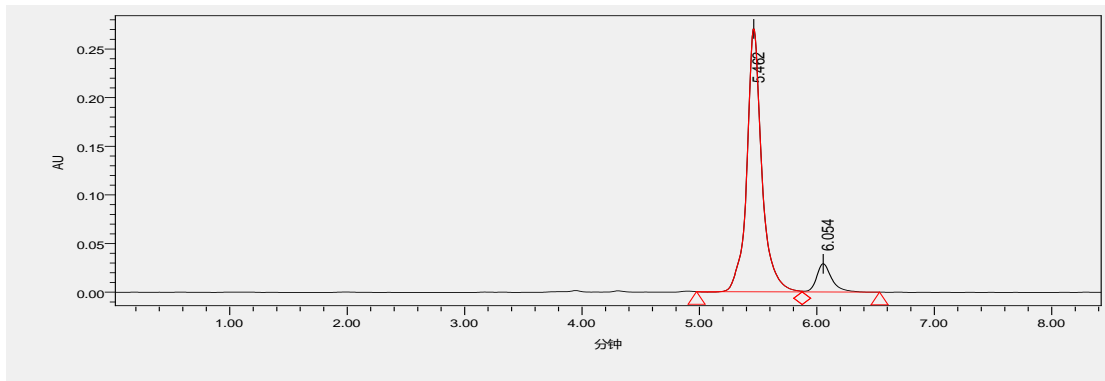

|   | Retention Time | Area    | % Area | Height |
|---|----------------|---------|--------|--------|
| 1 | 5.462          | 2411406 | 90.26  | 271127 |
| 2 | 6.054          | 260307  | 9.74   | 29130  |

# NMR Spectra

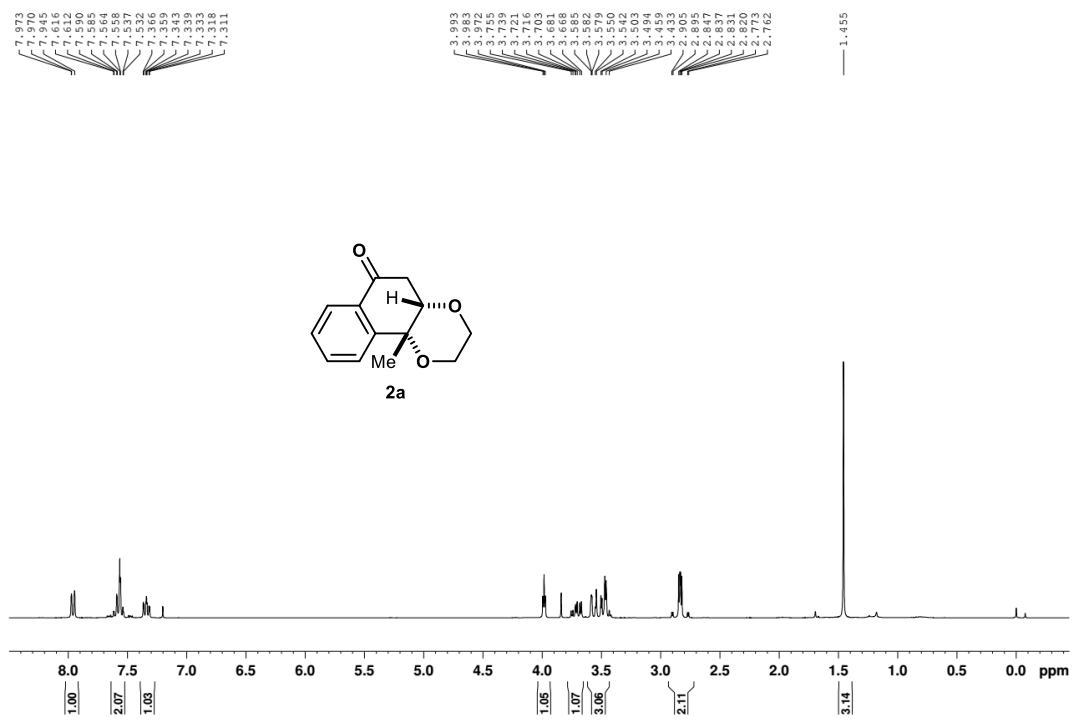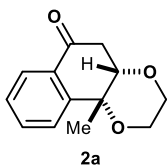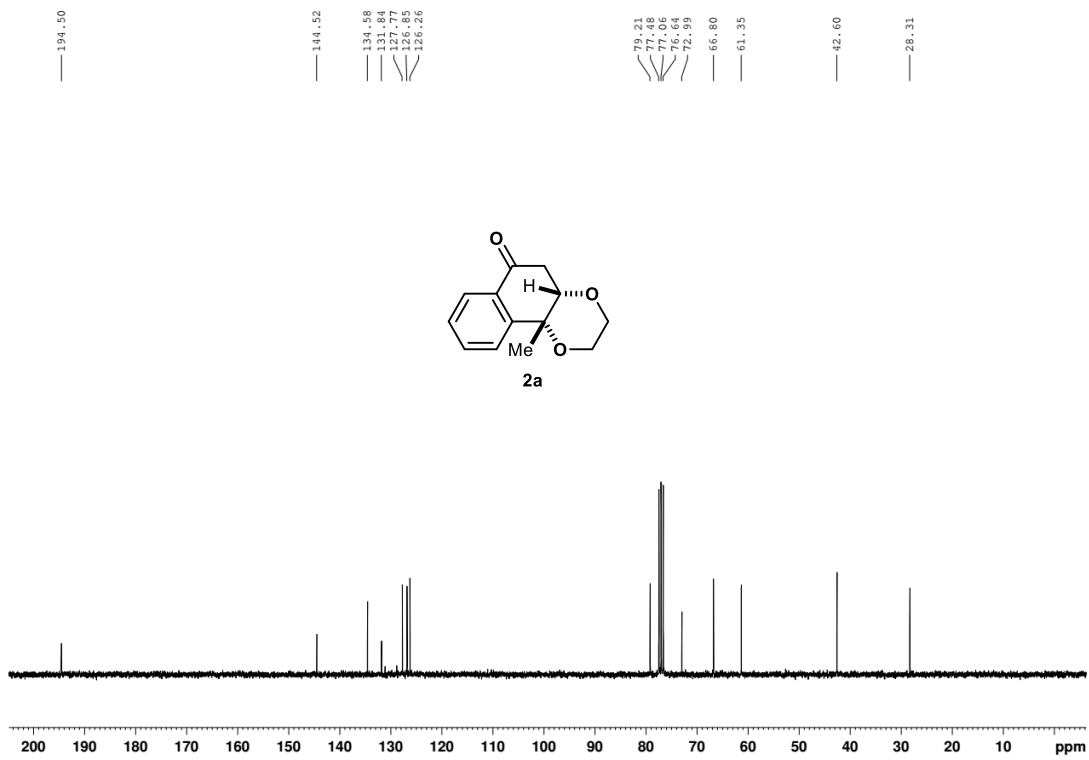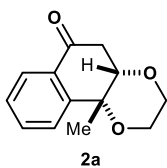



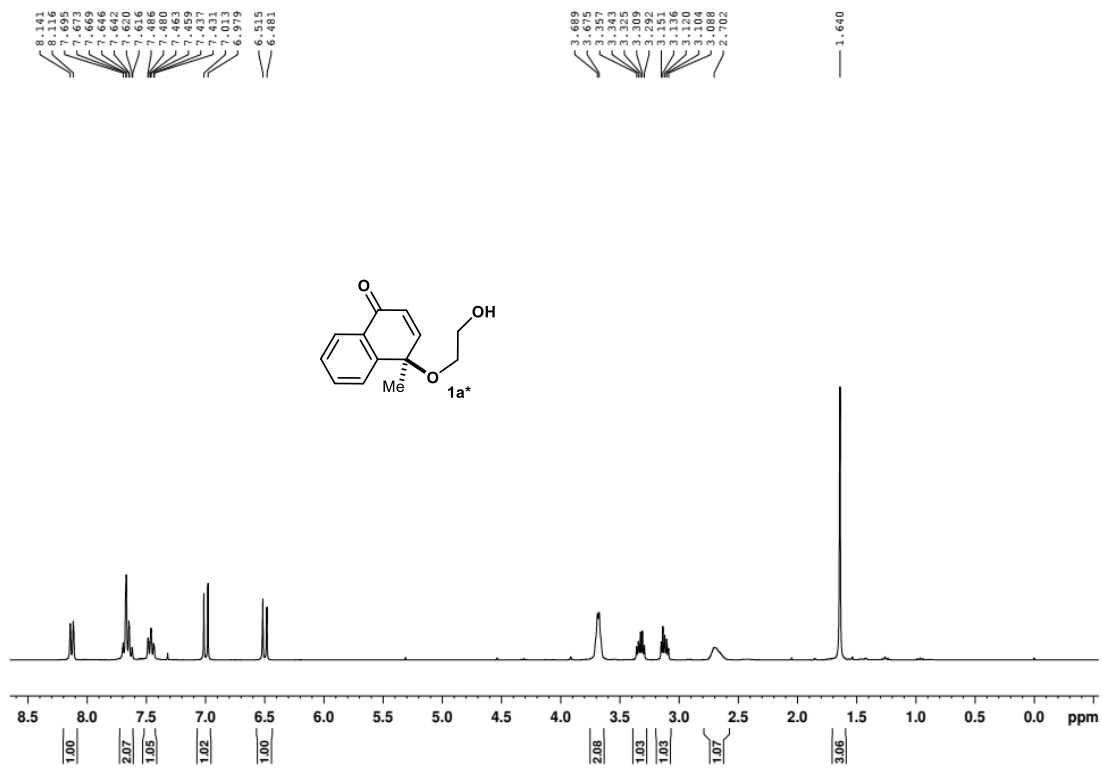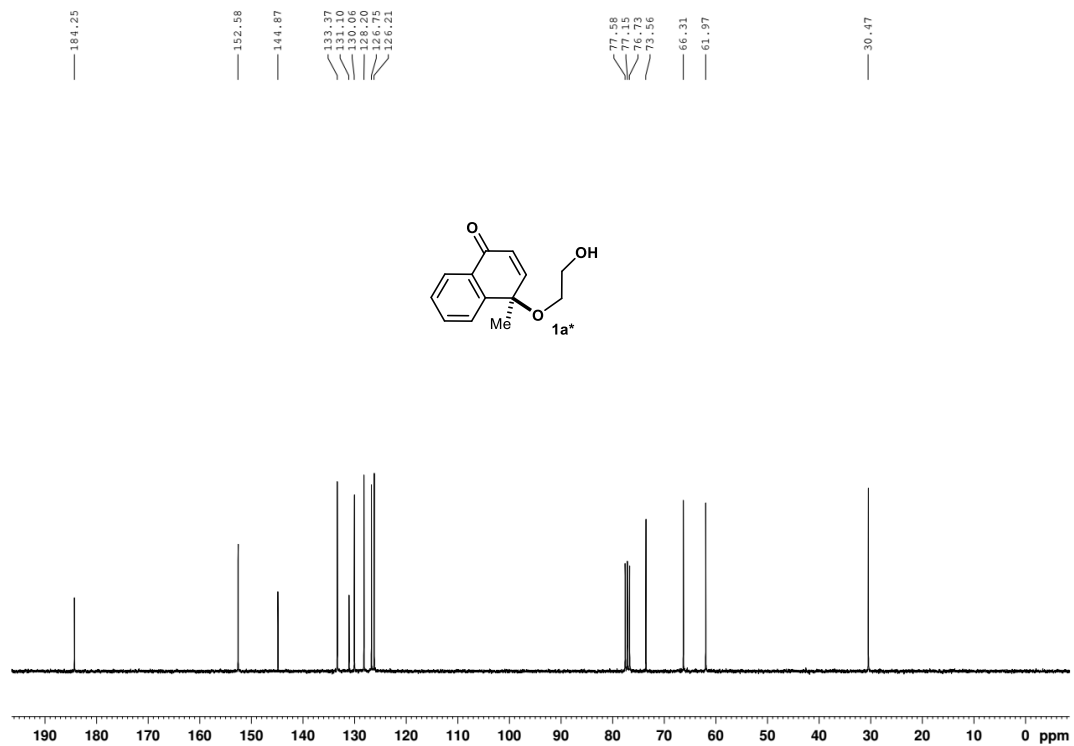

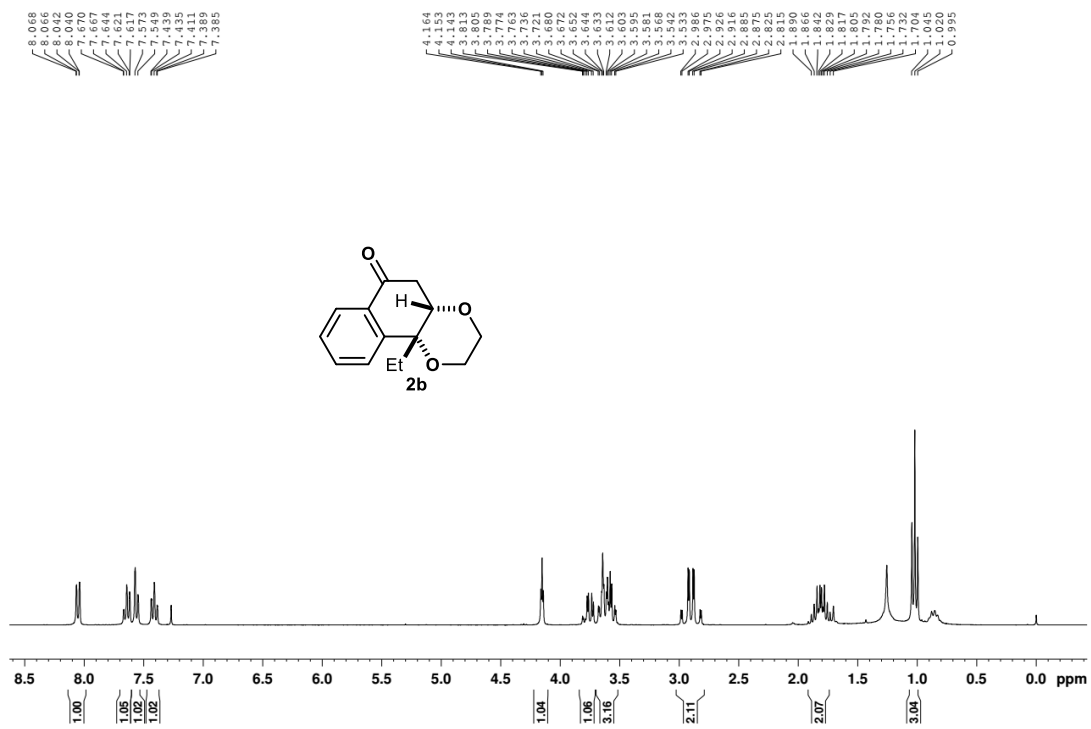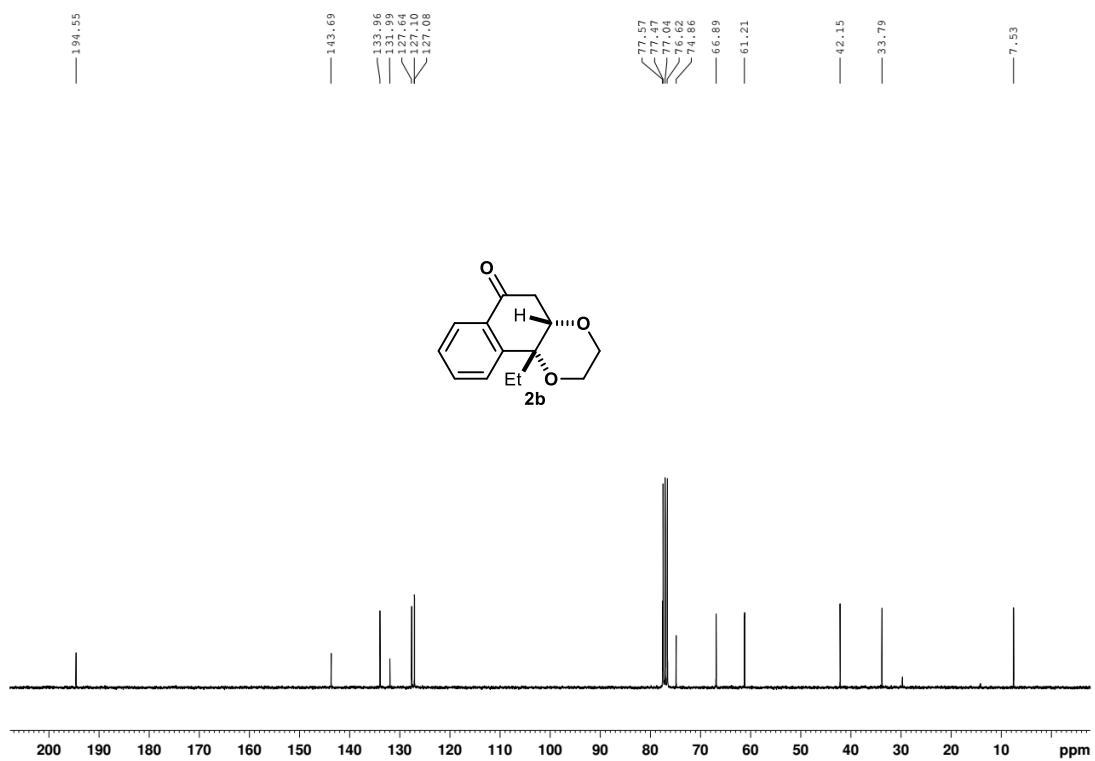

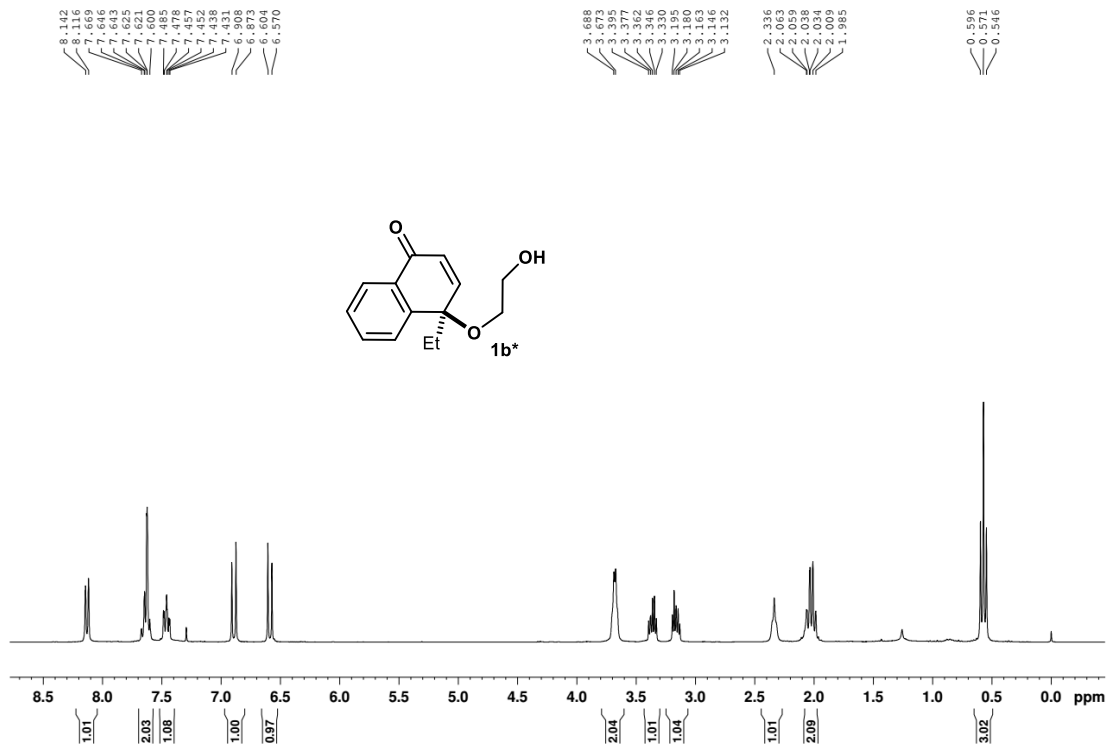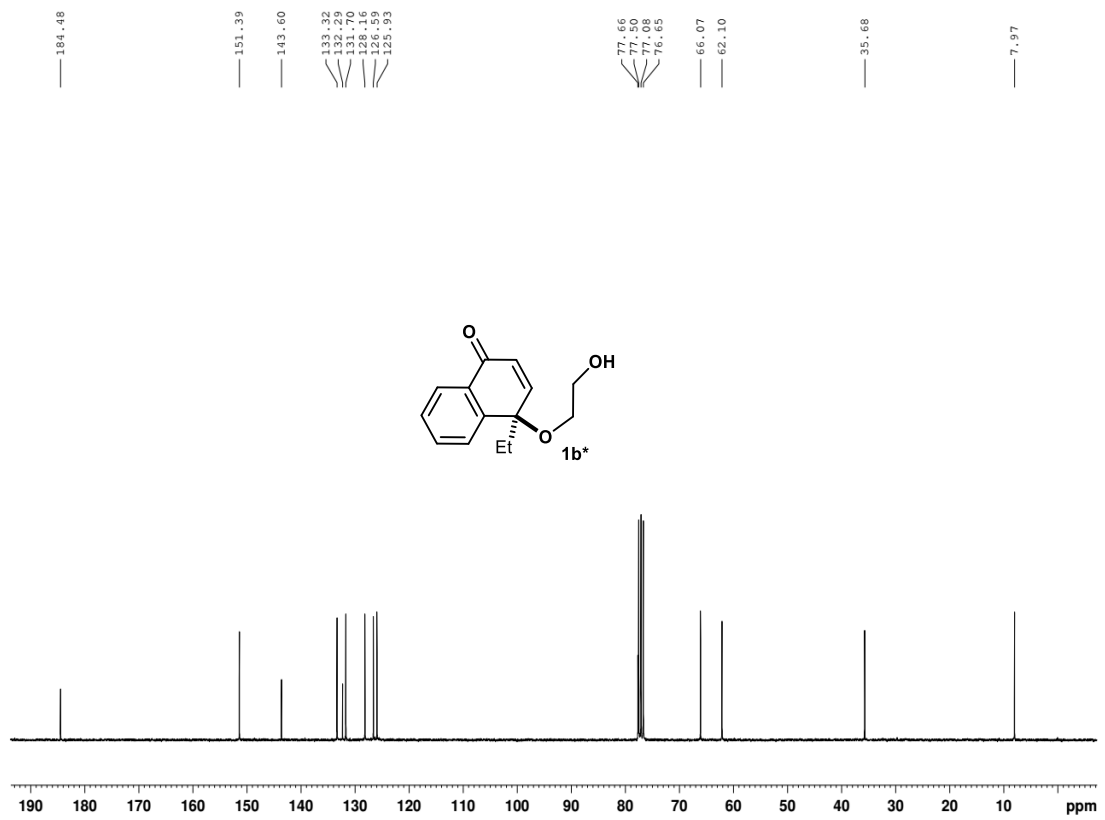

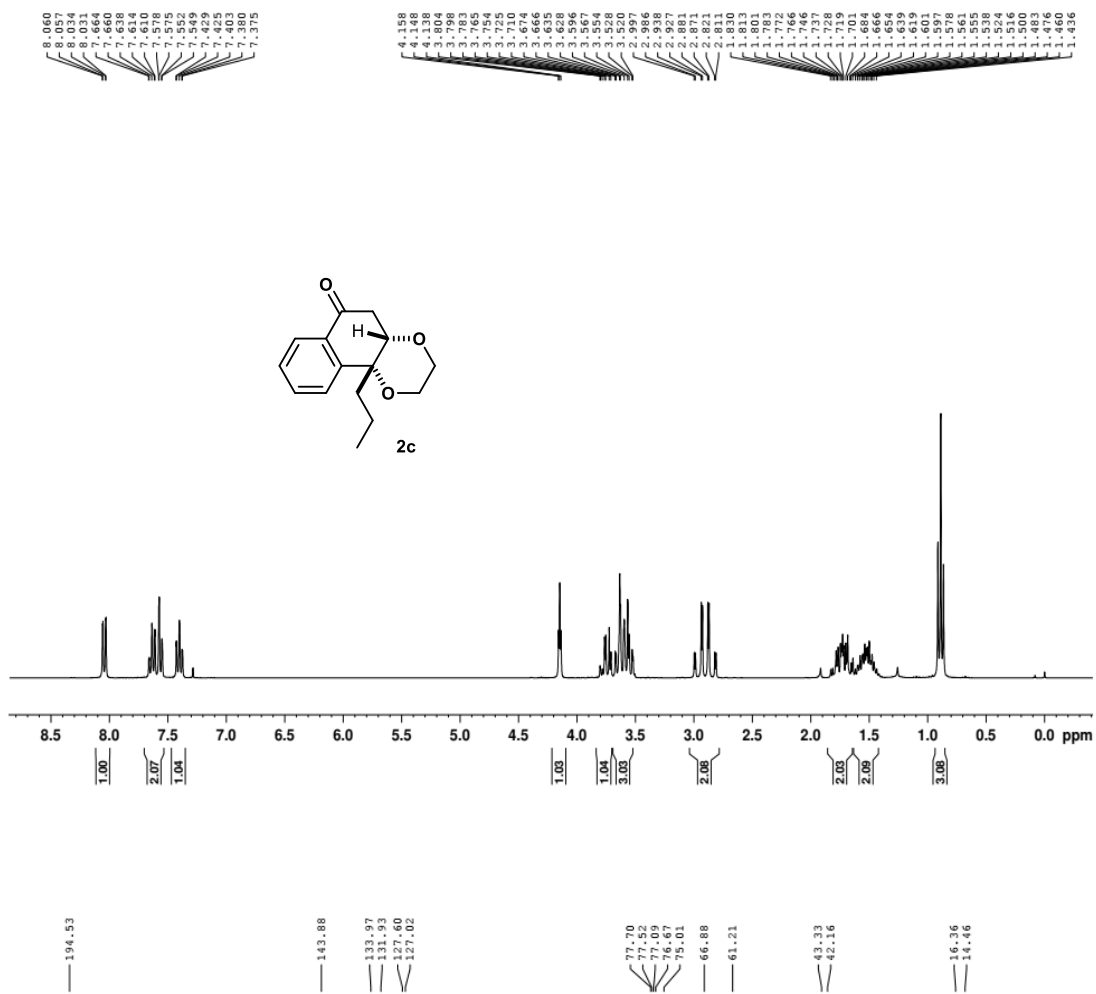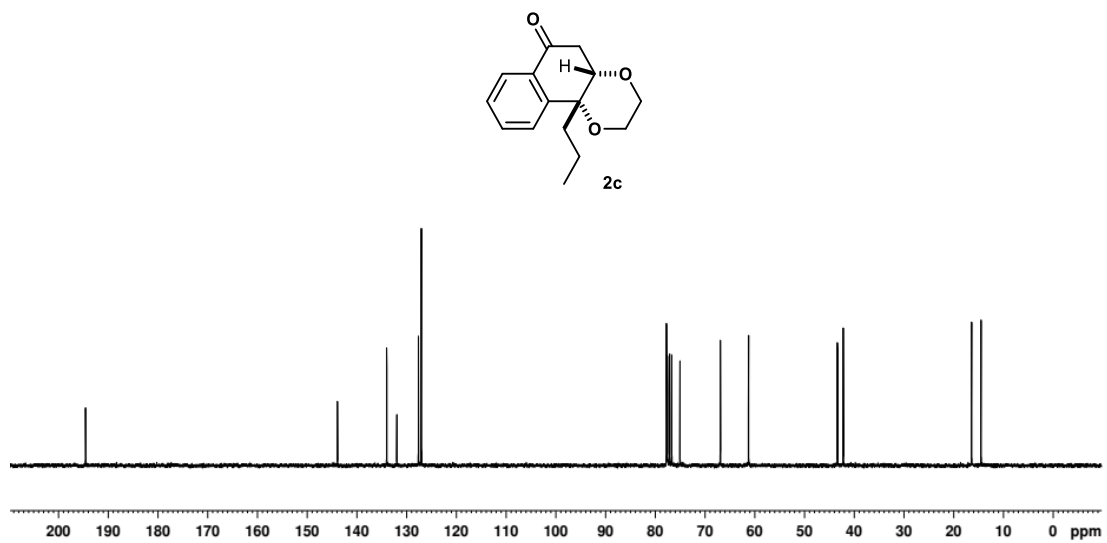

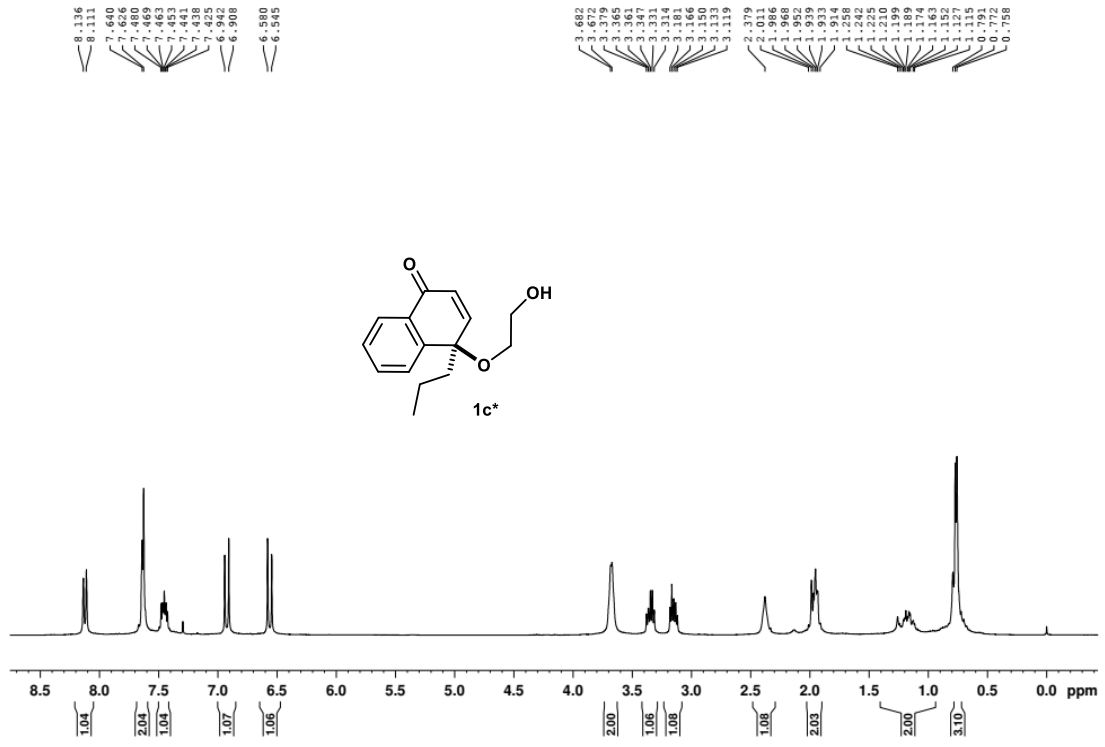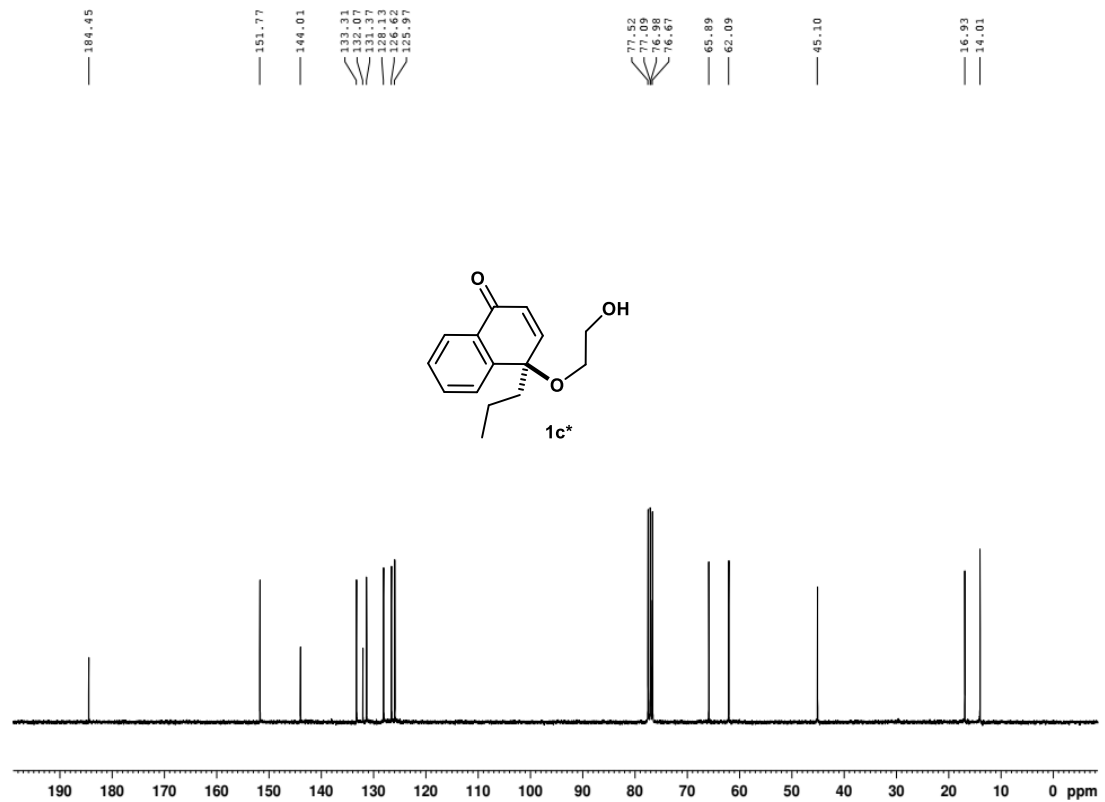

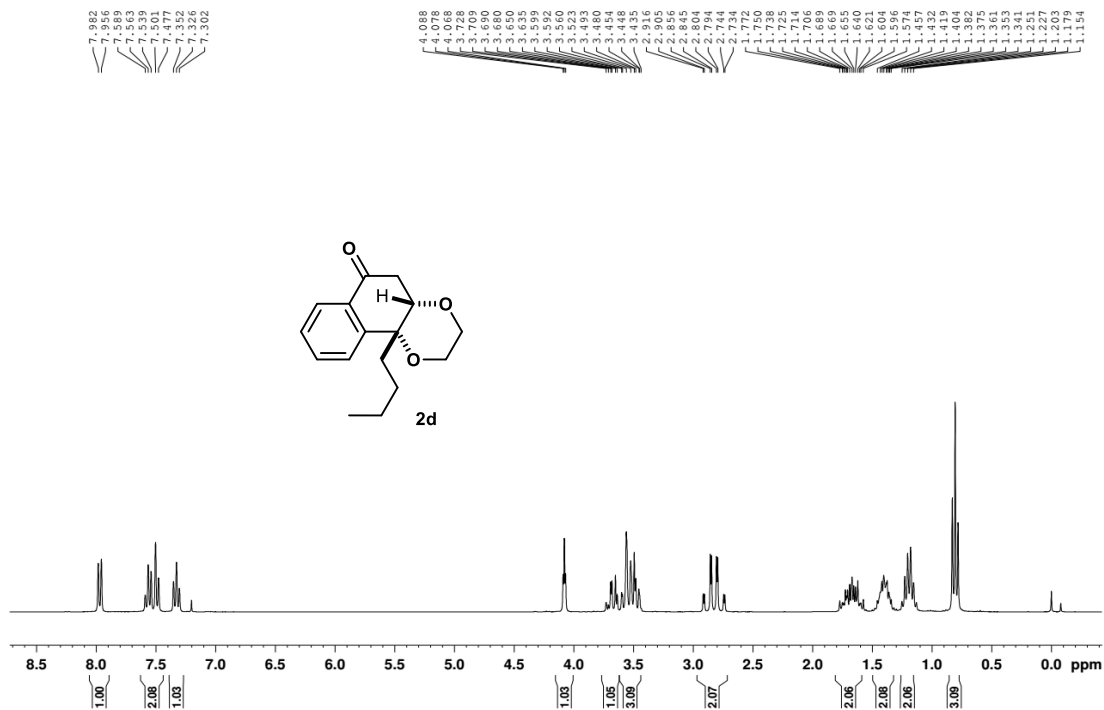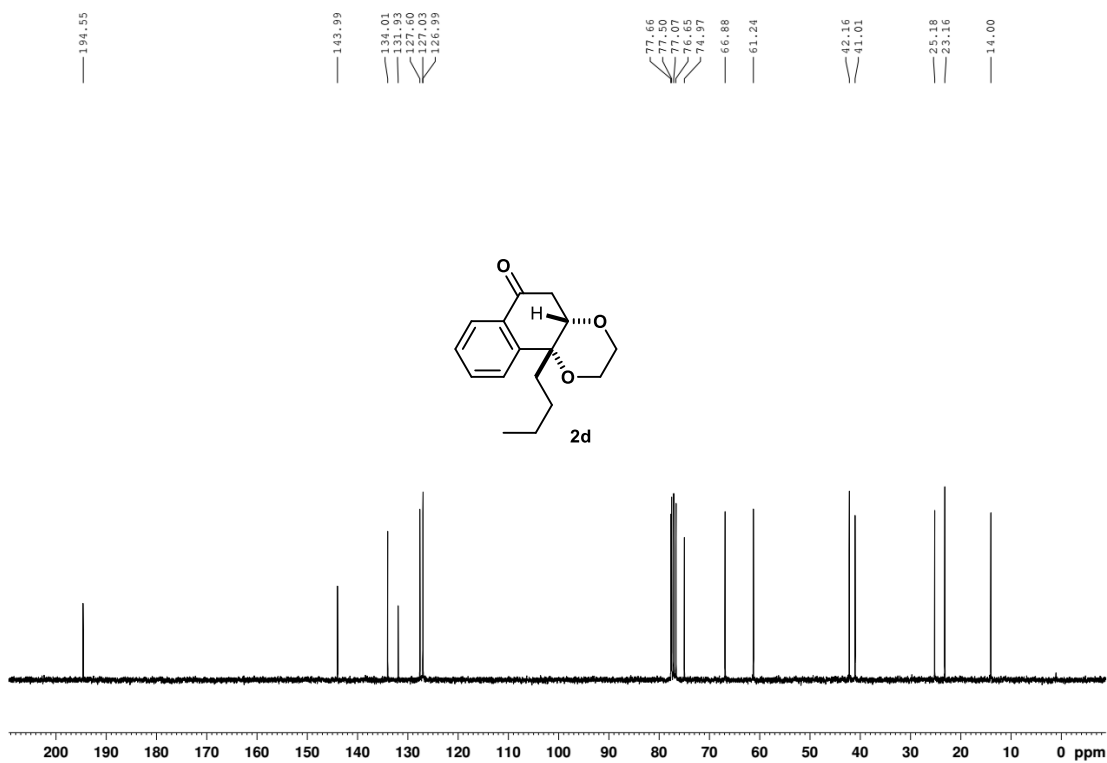

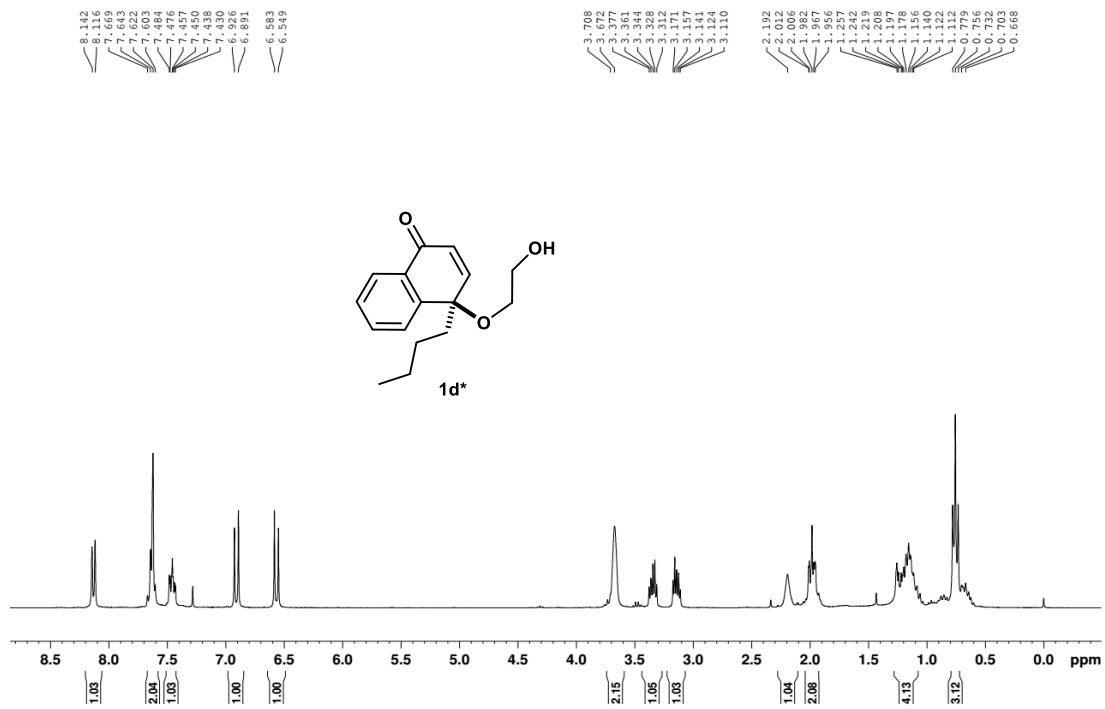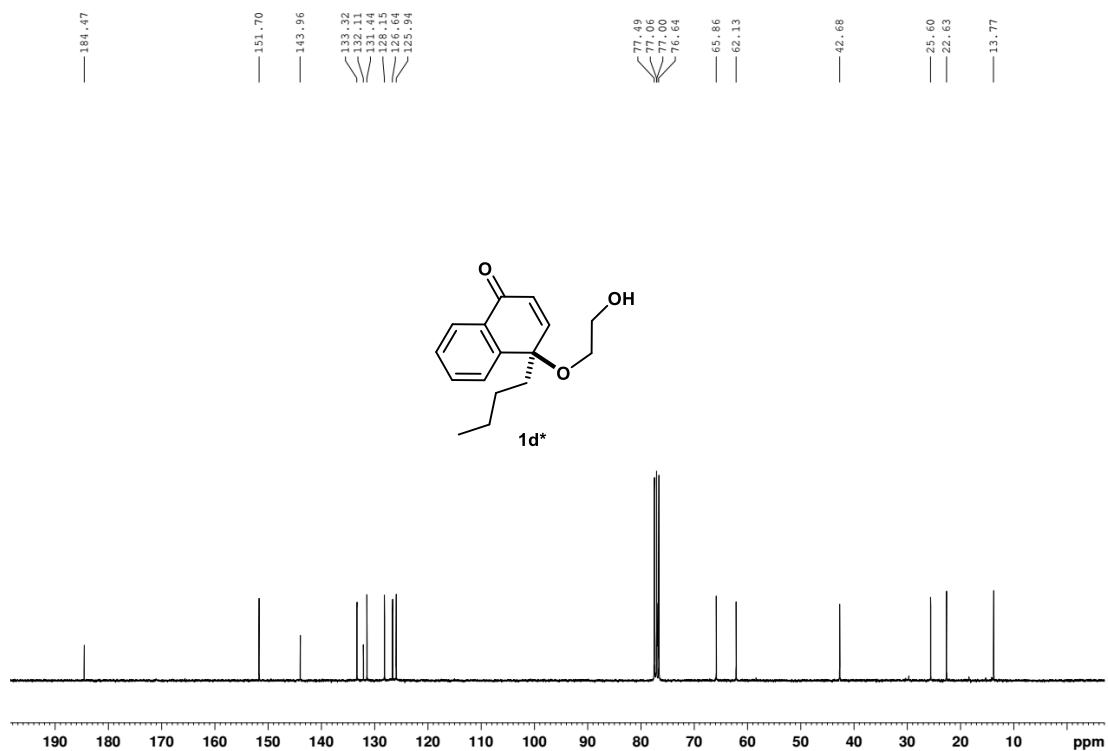

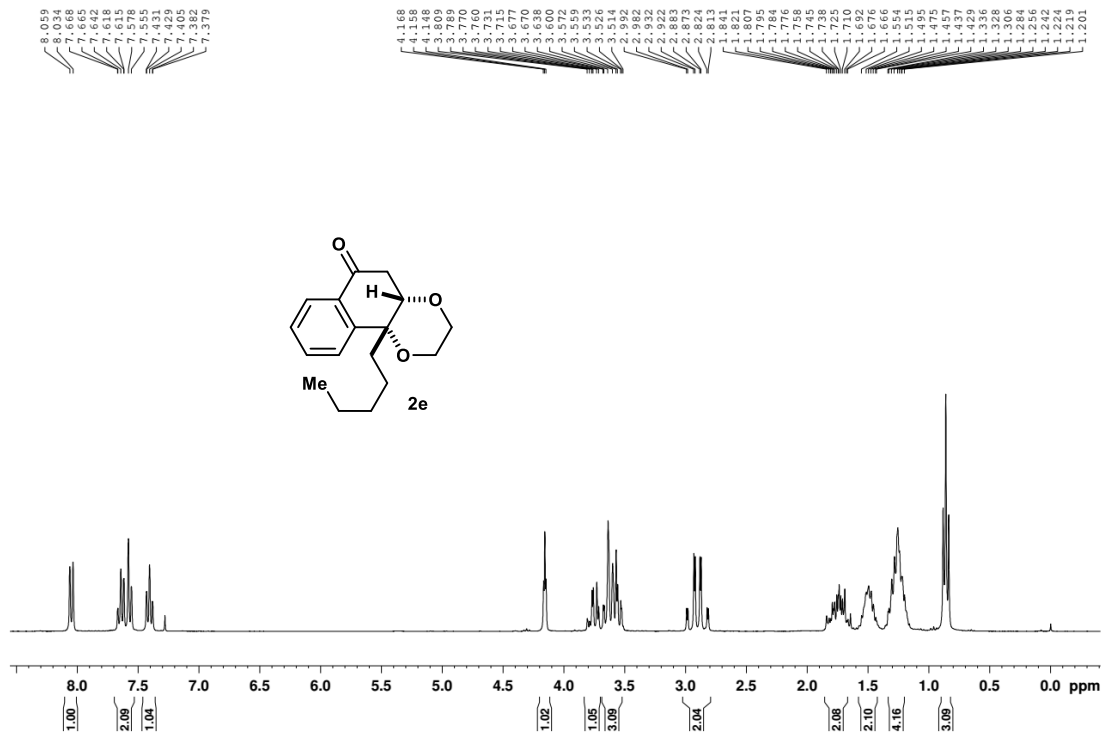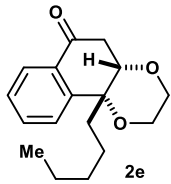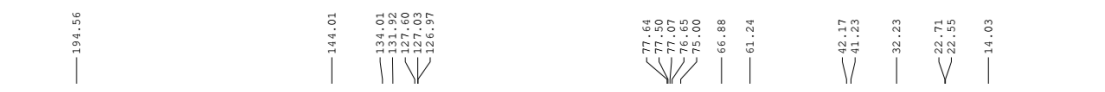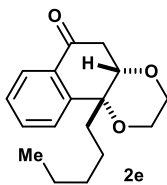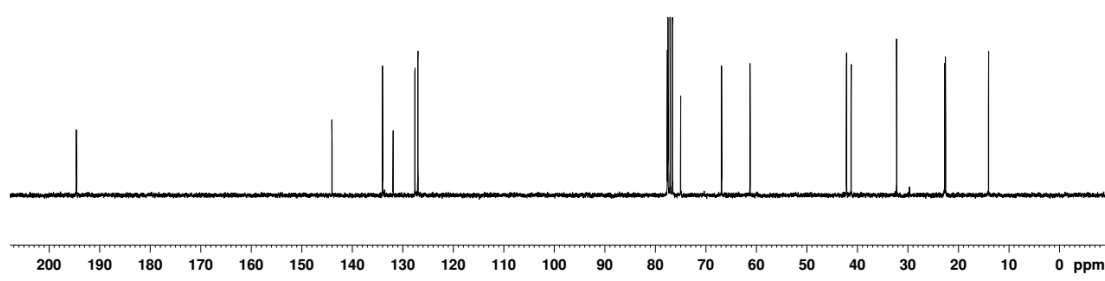



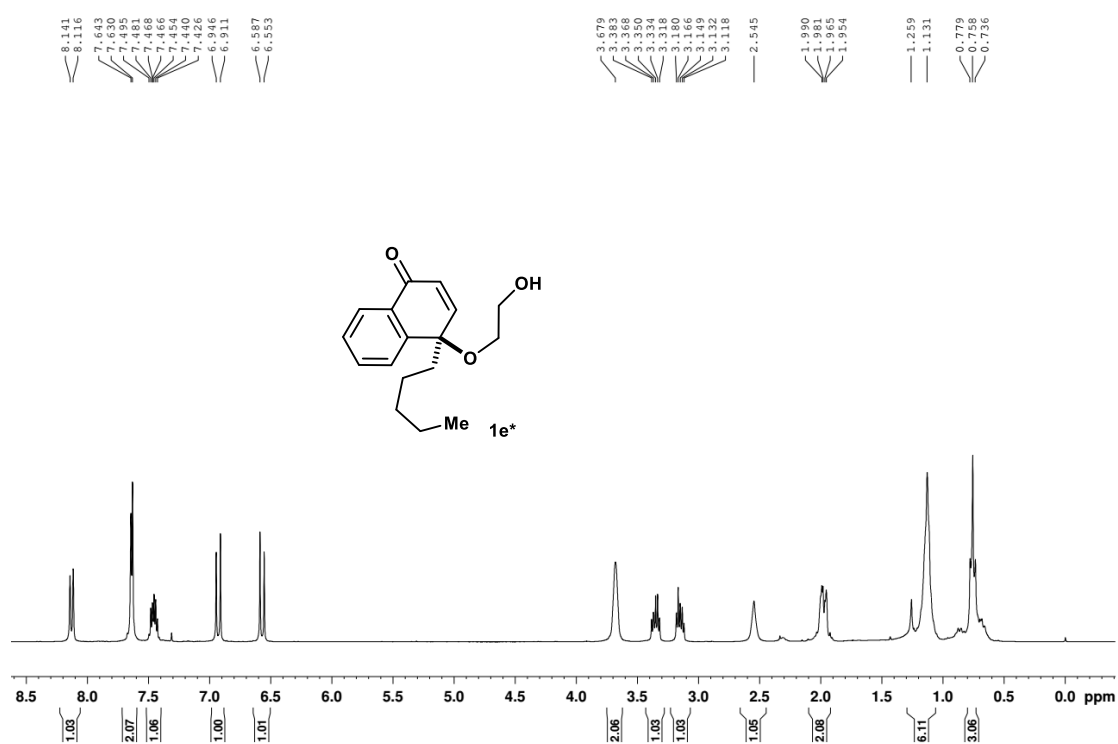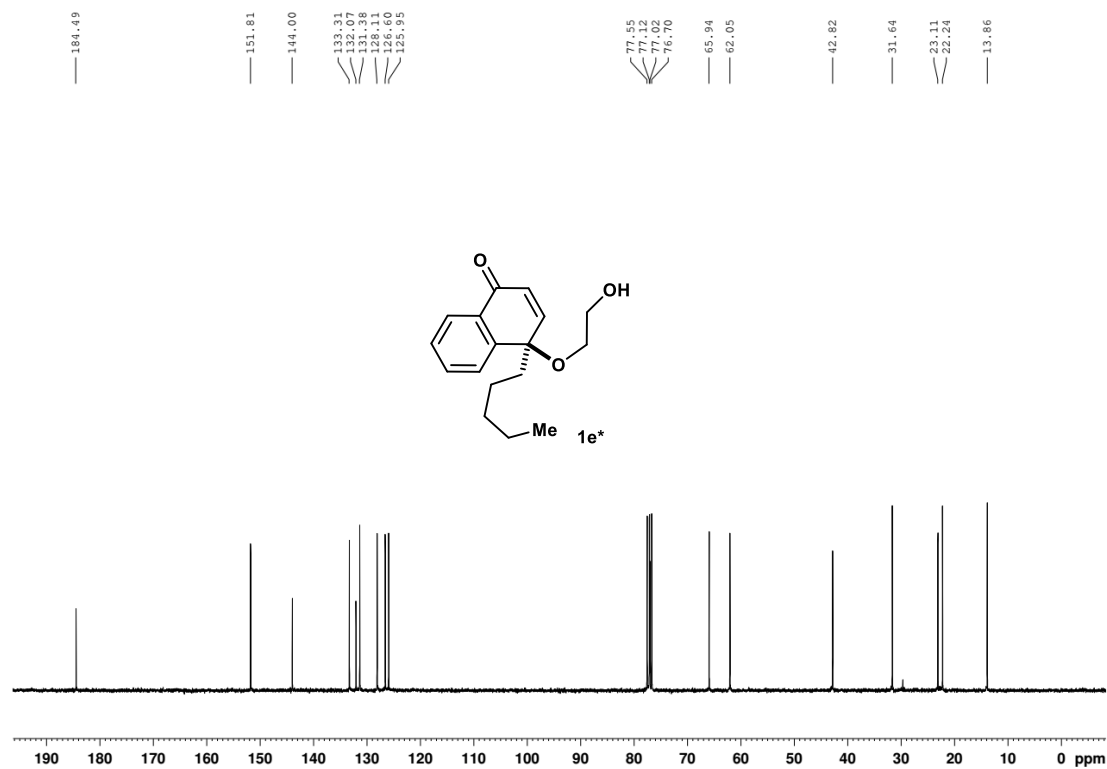

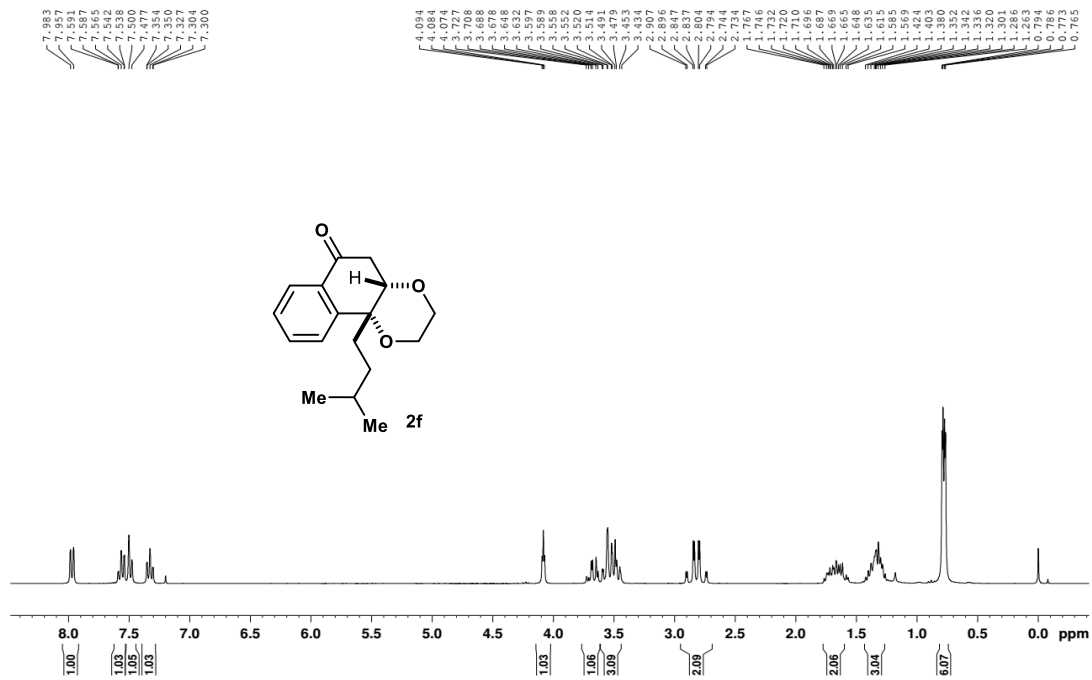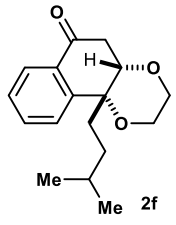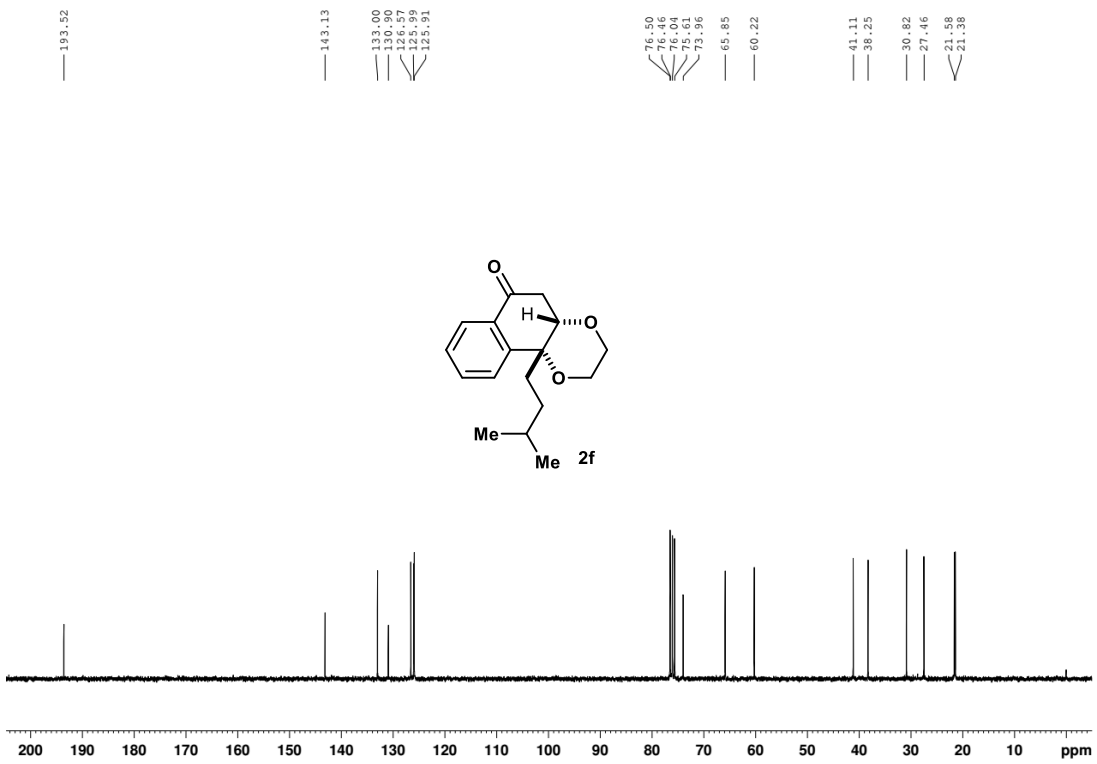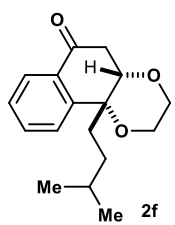

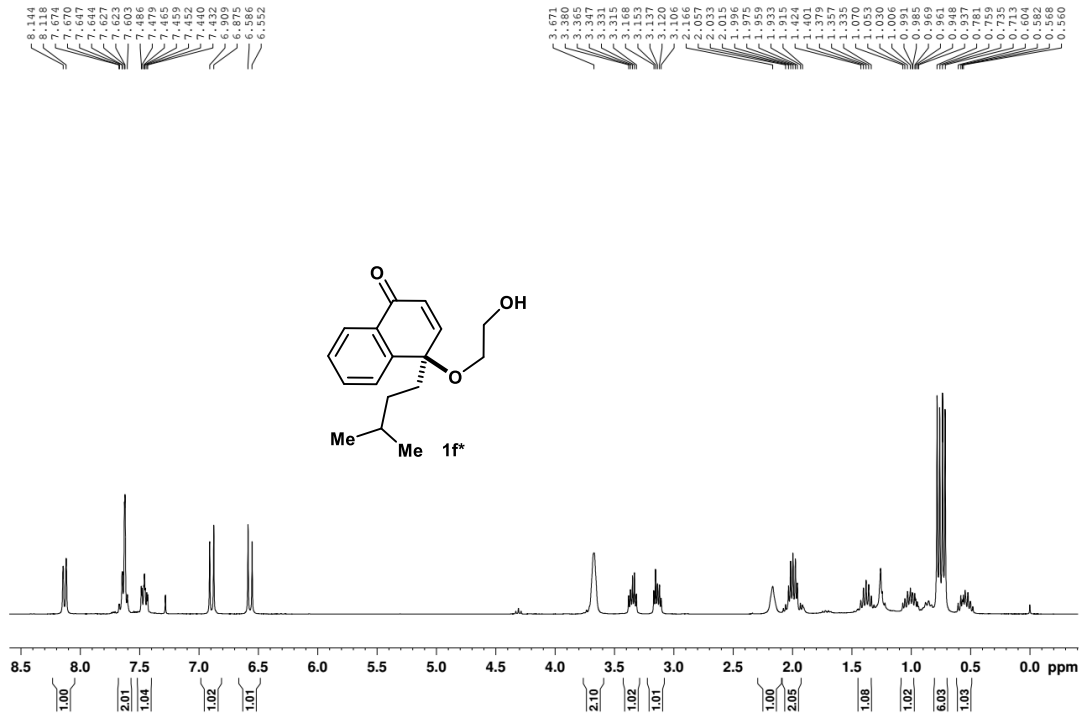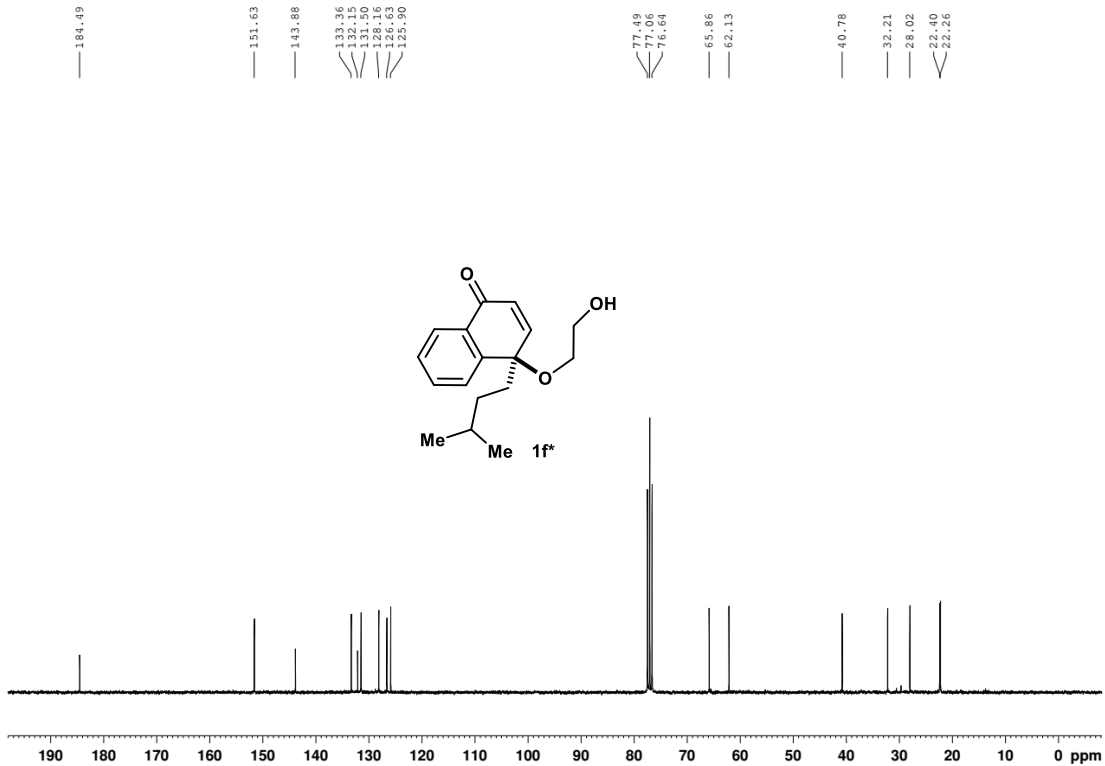

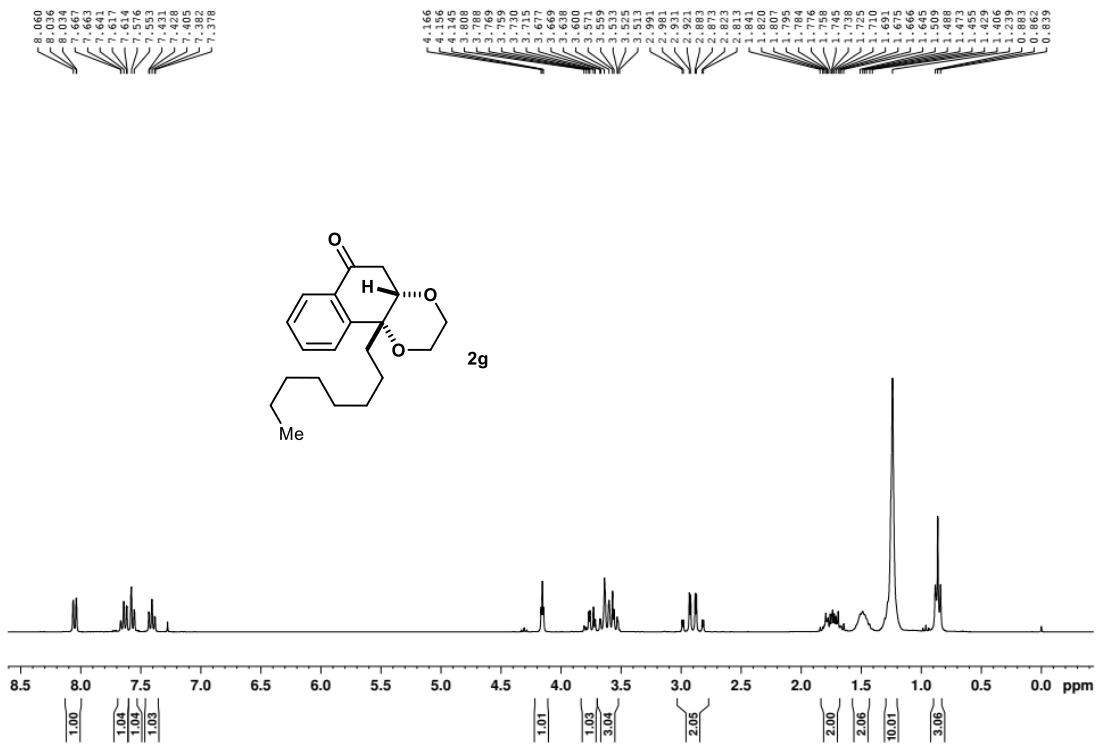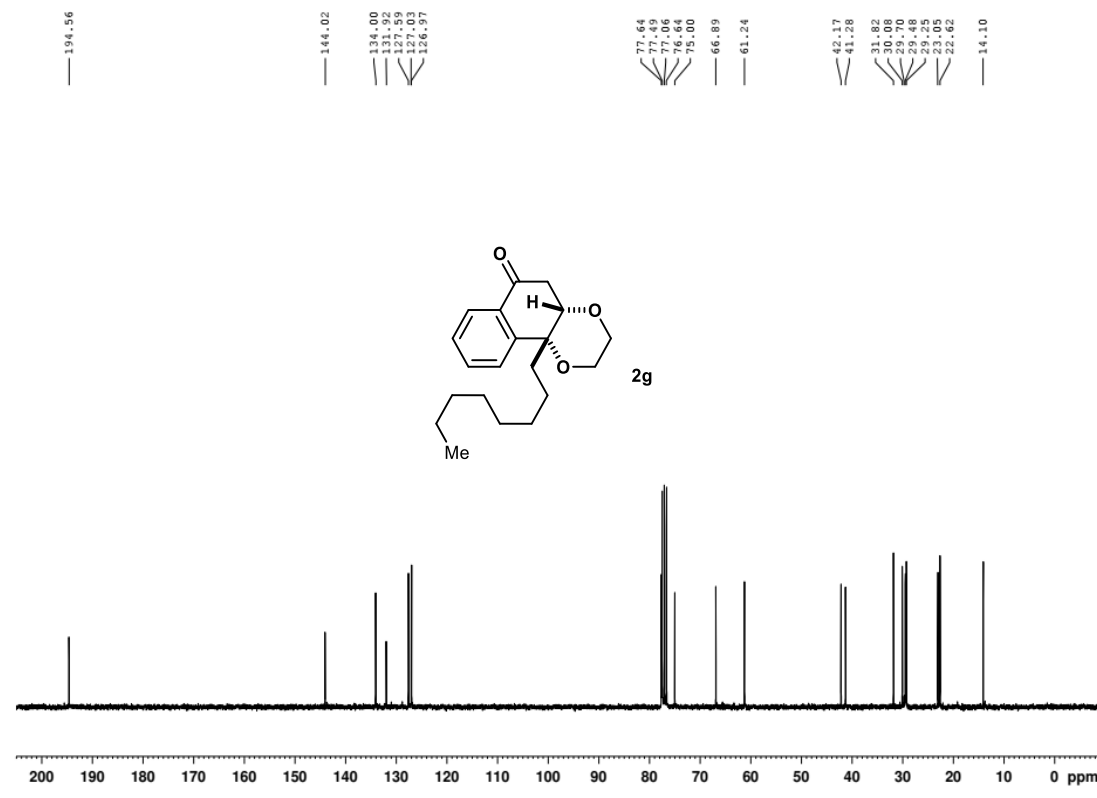

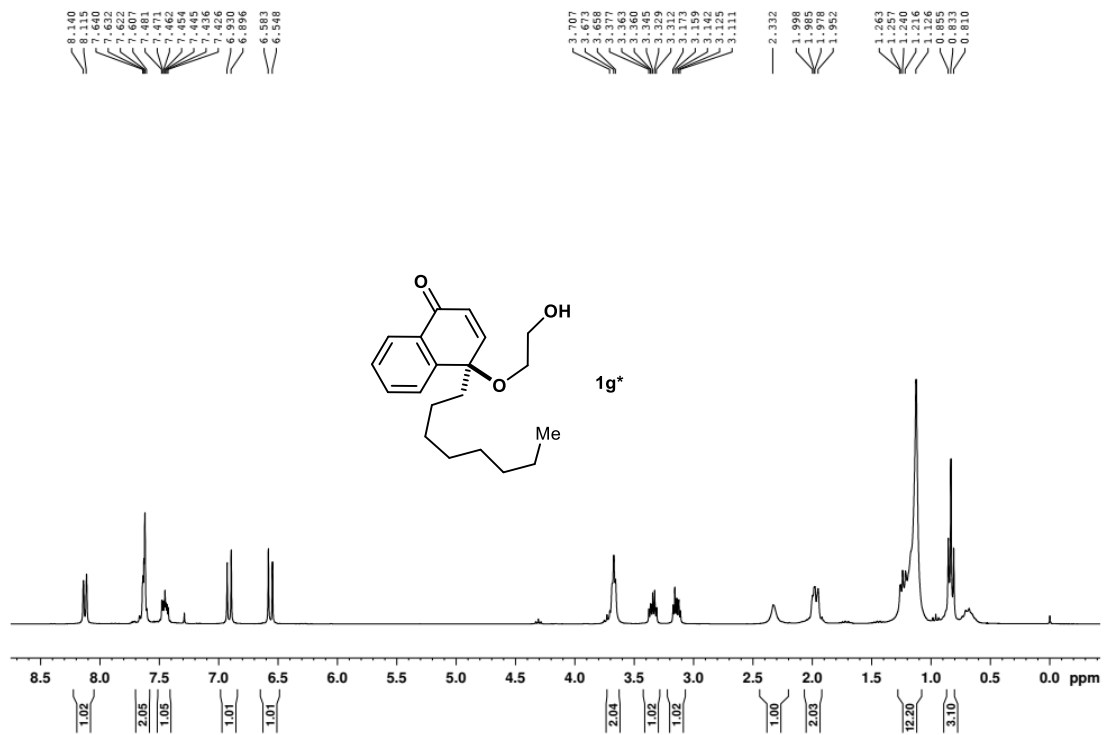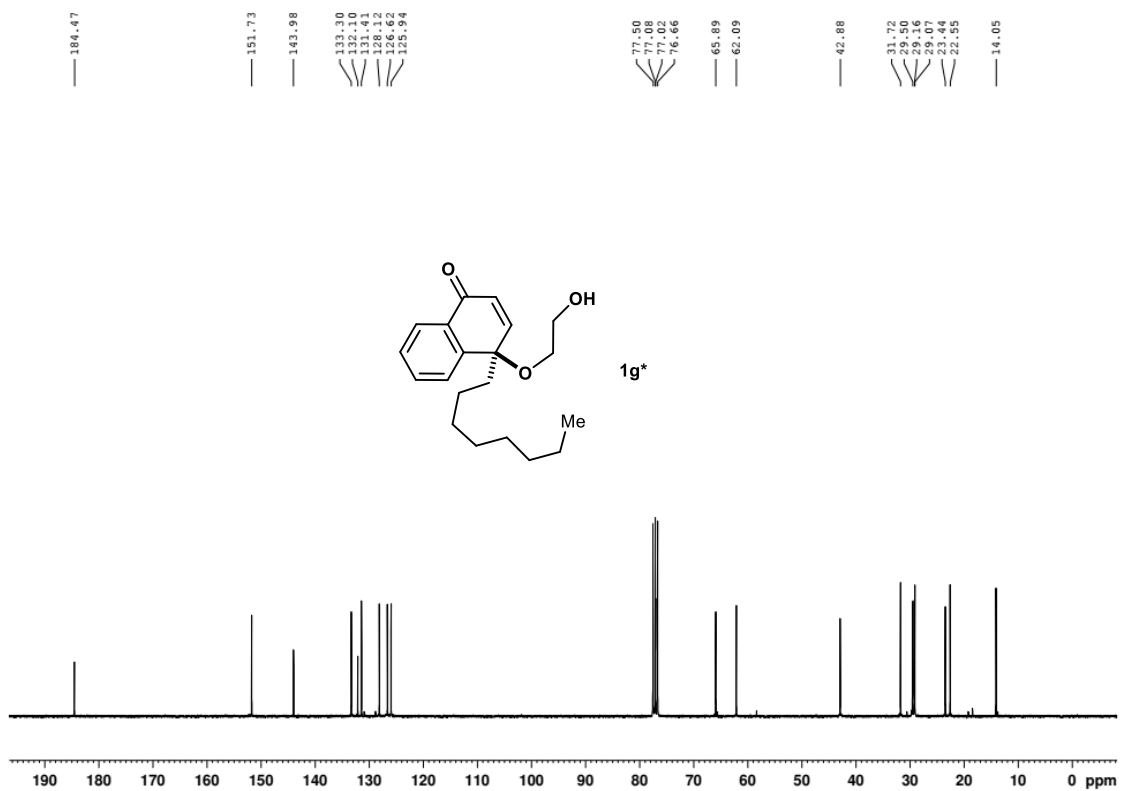

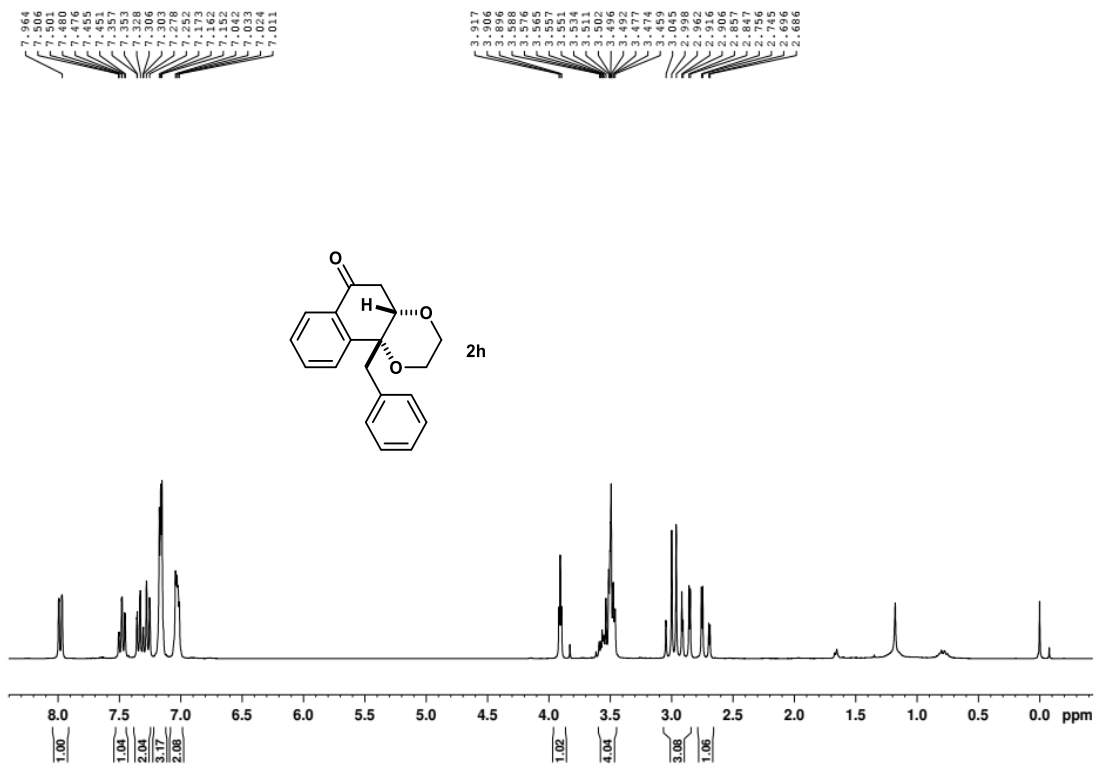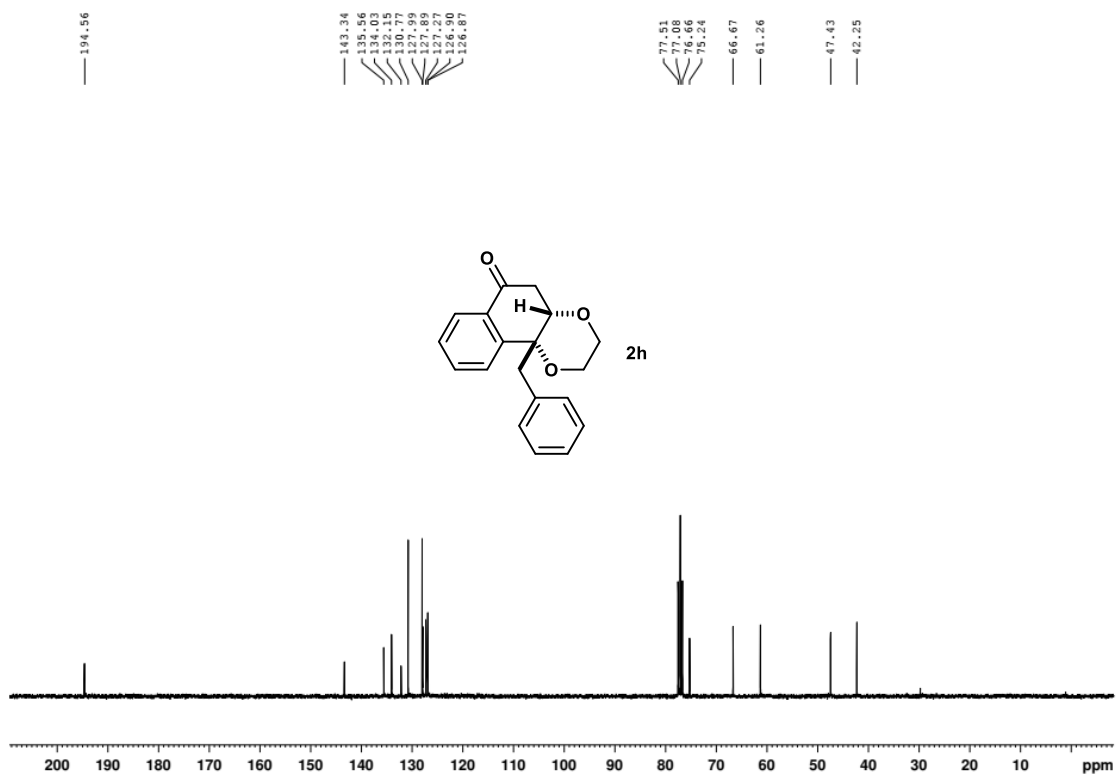

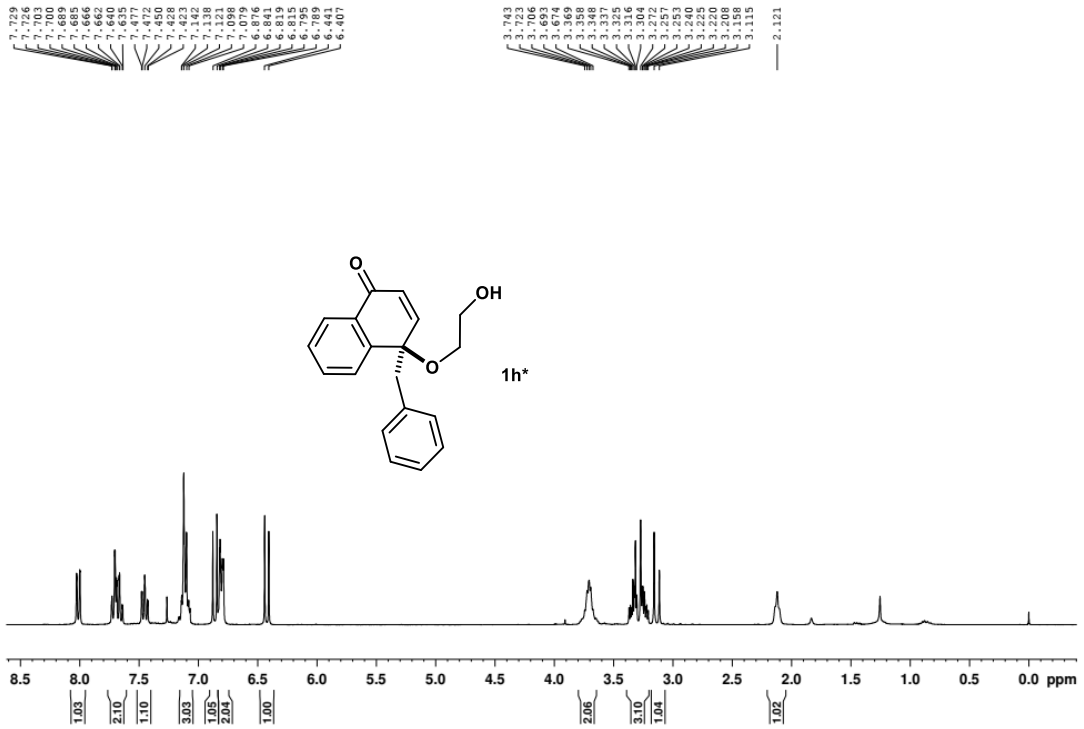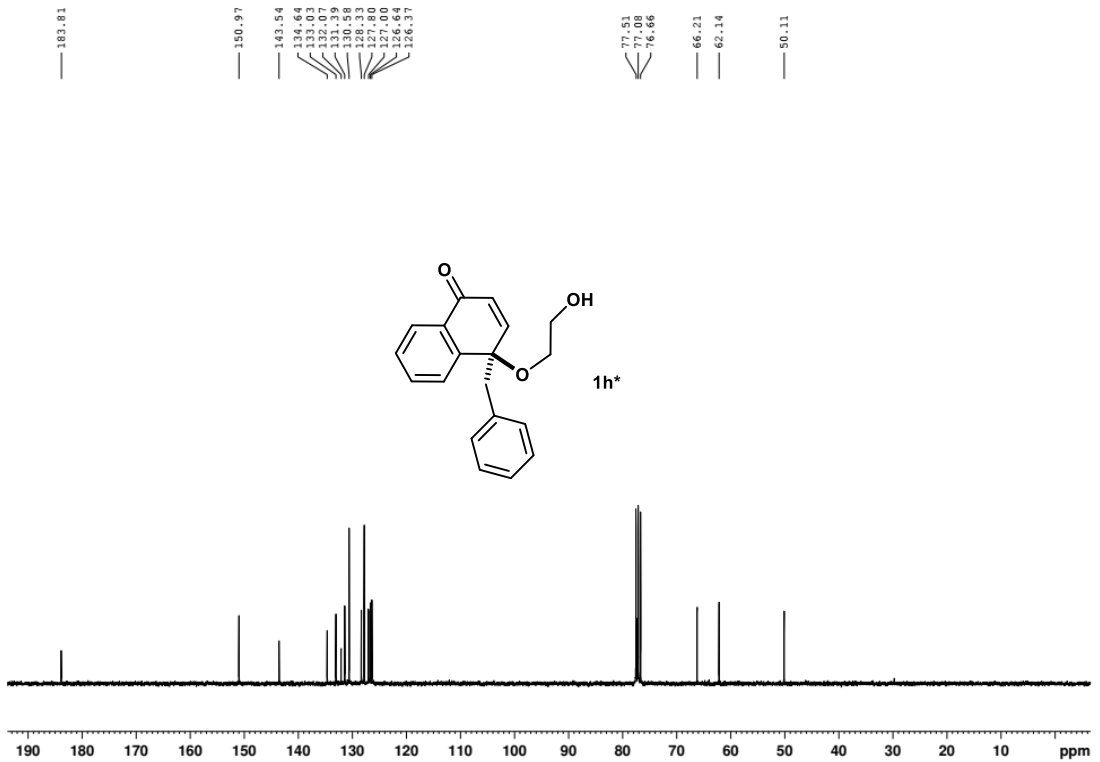

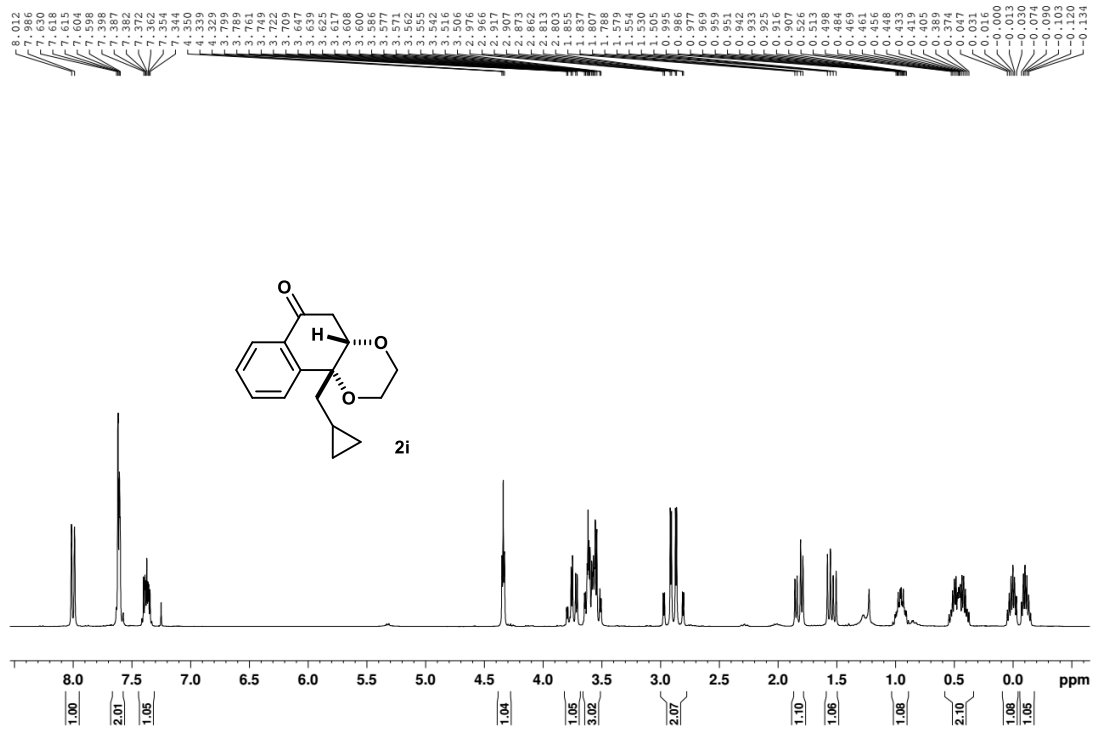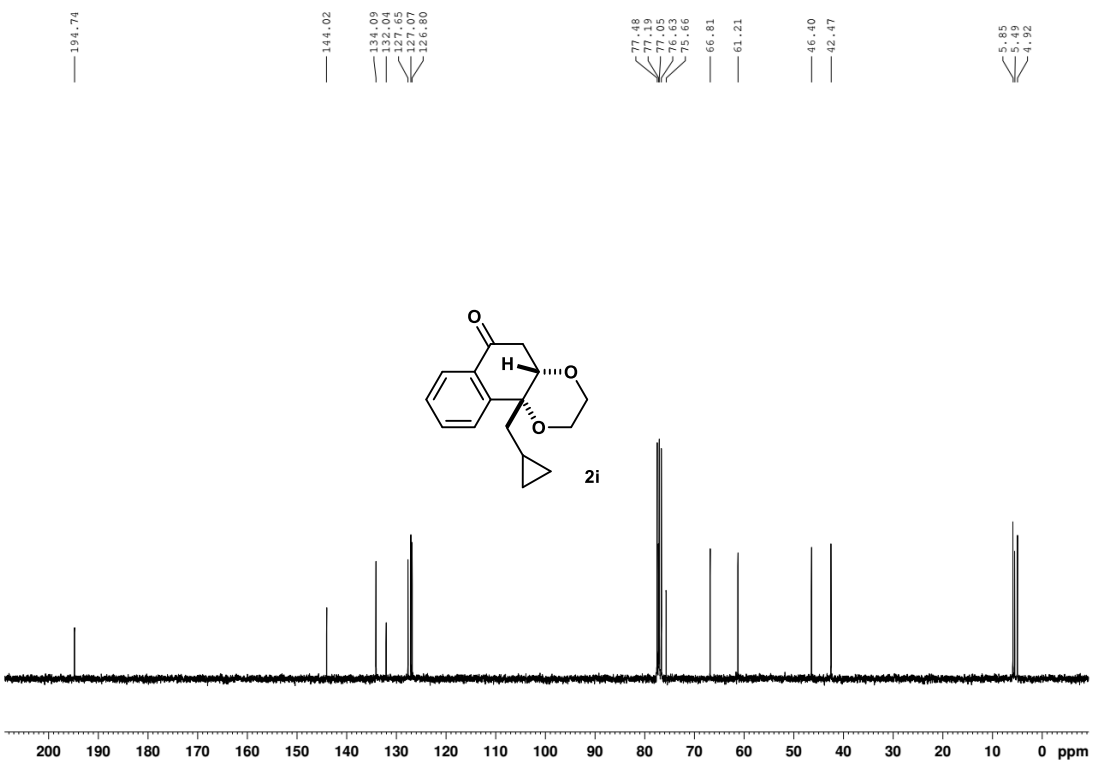



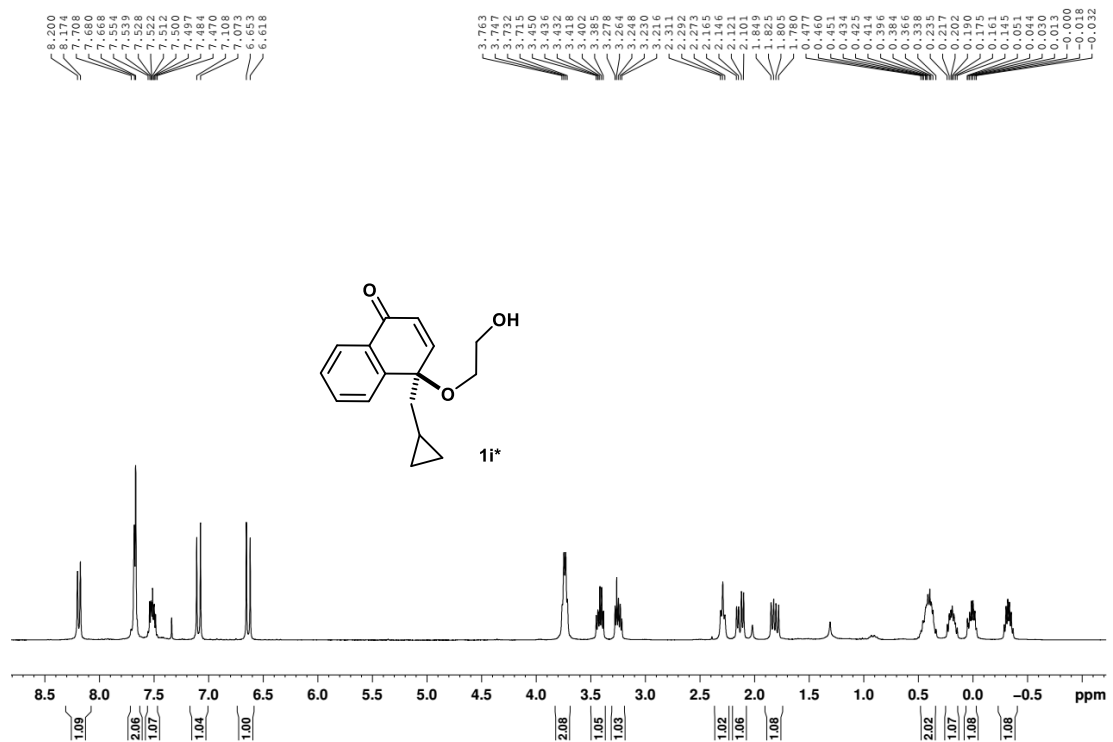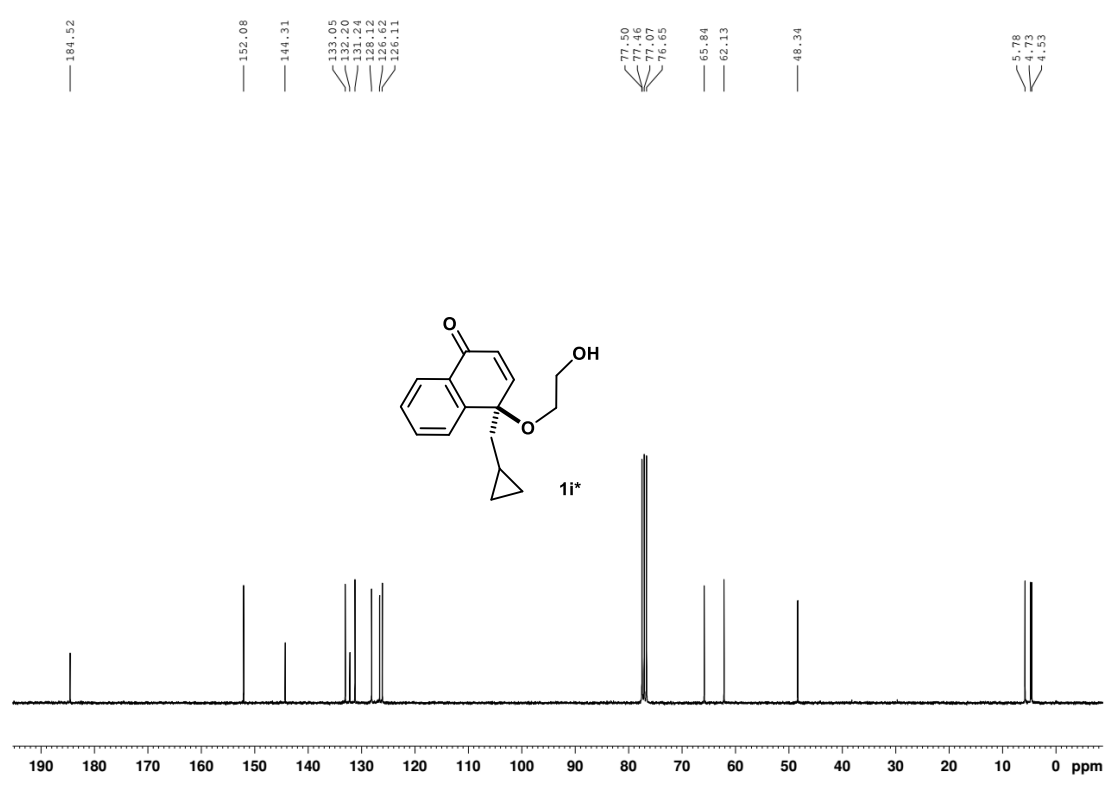

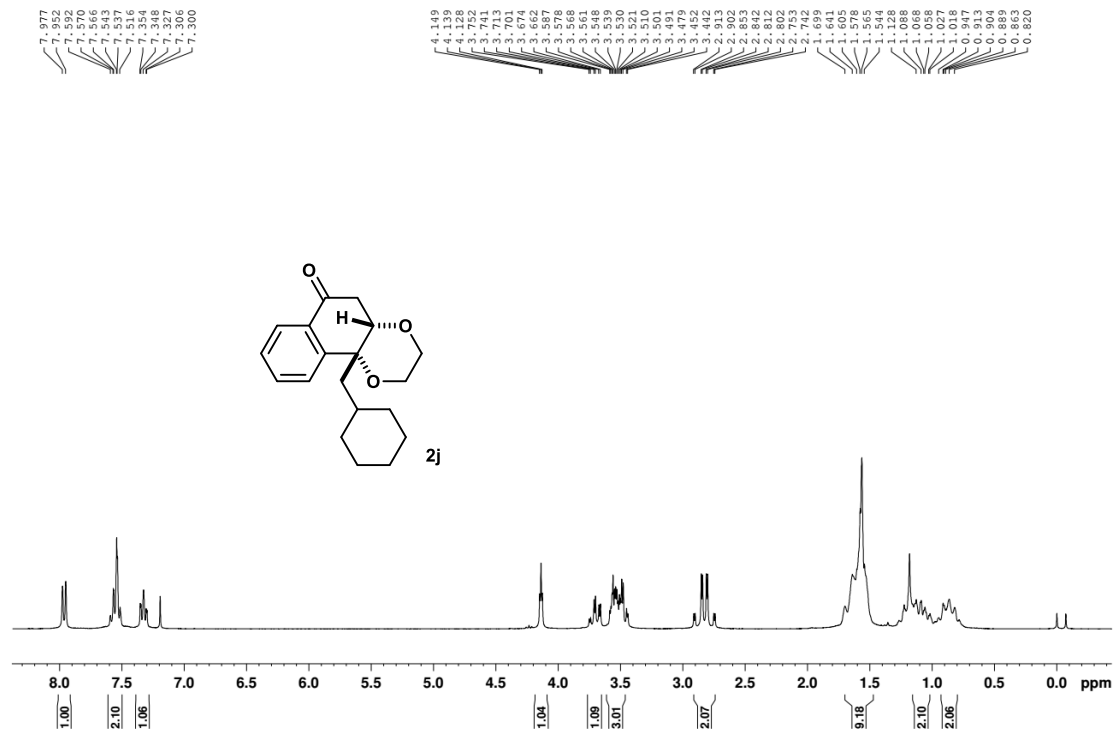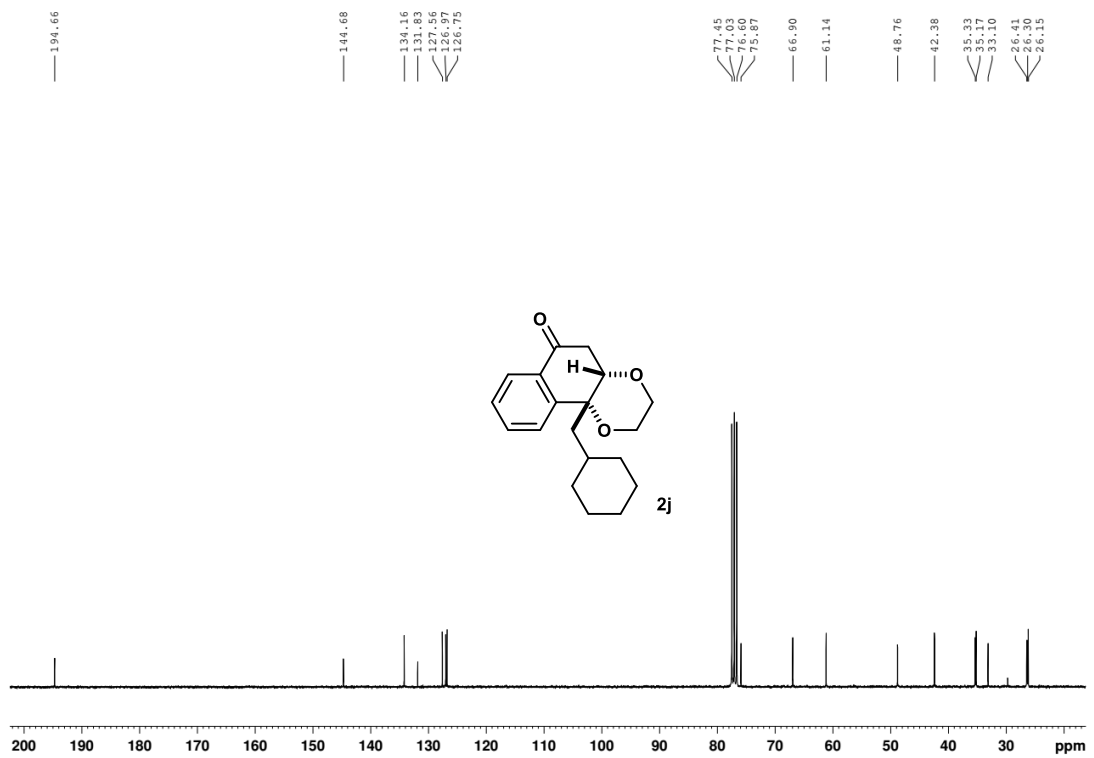

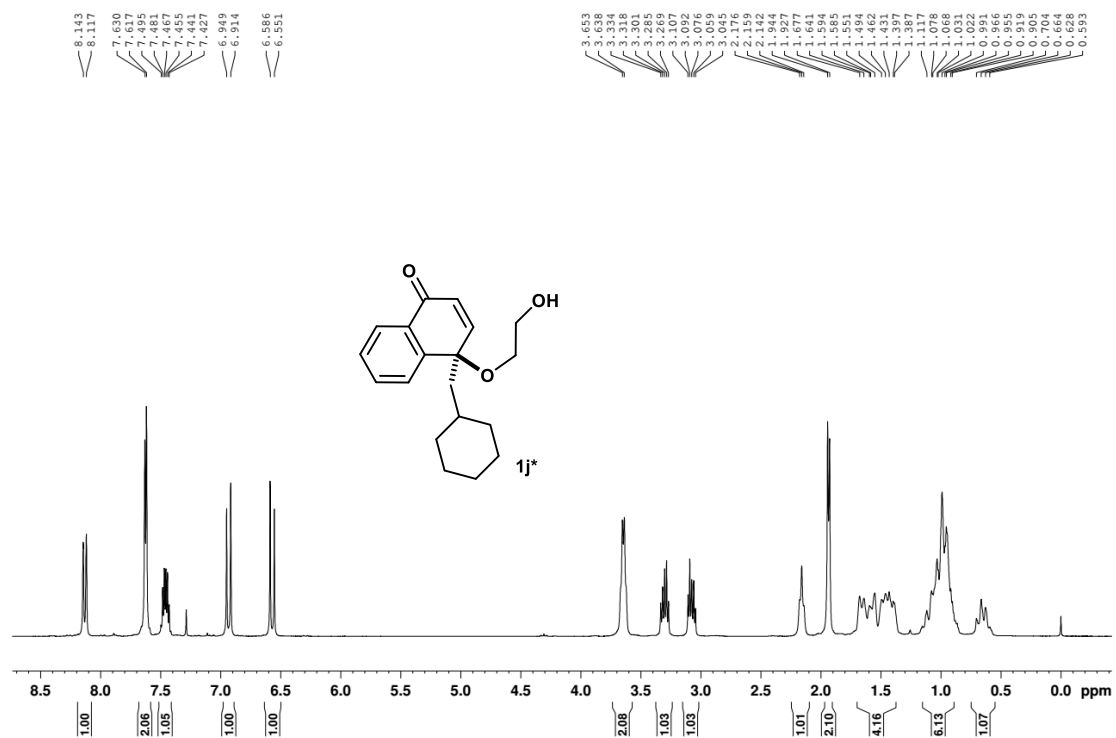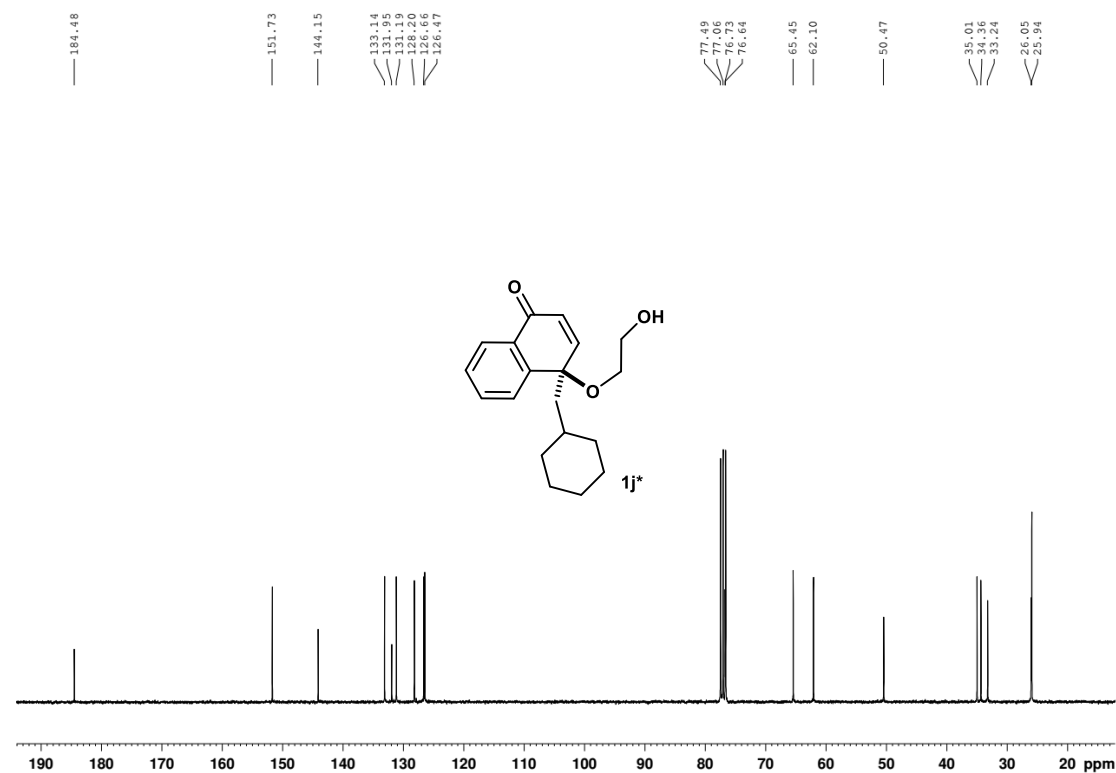

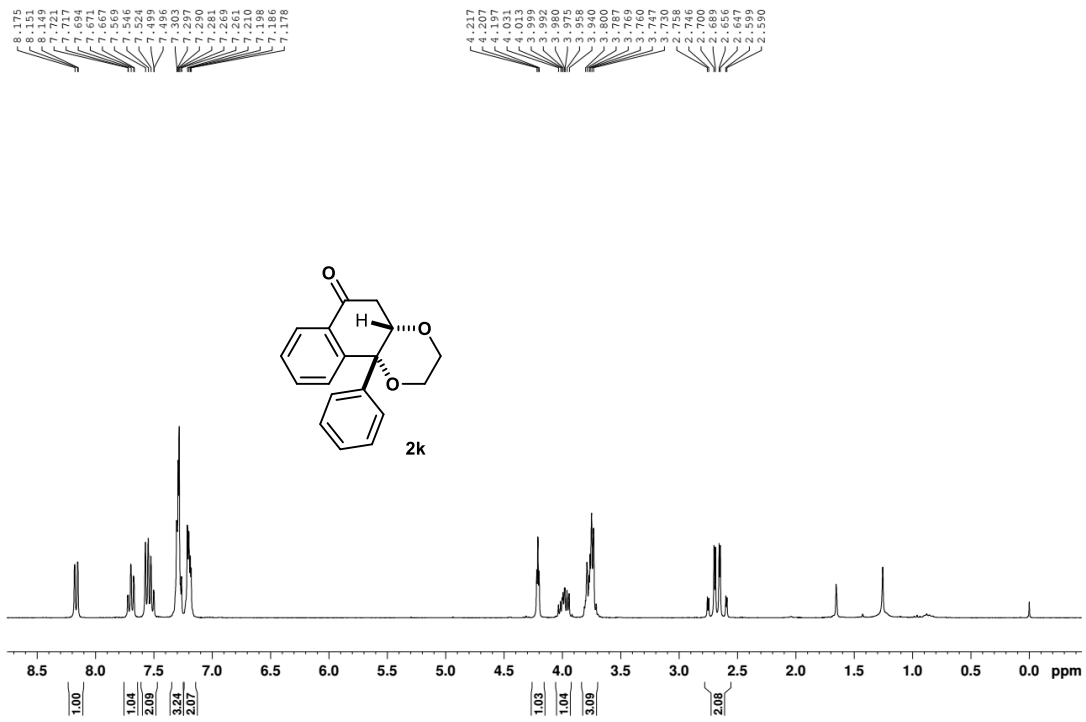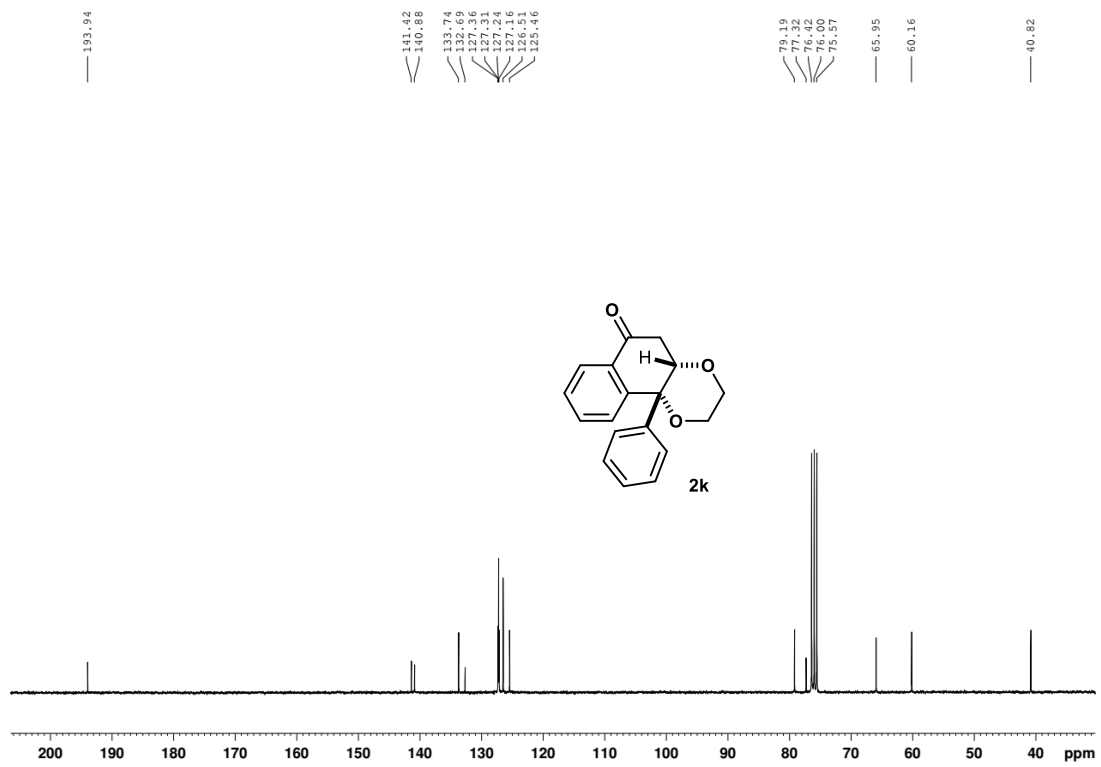

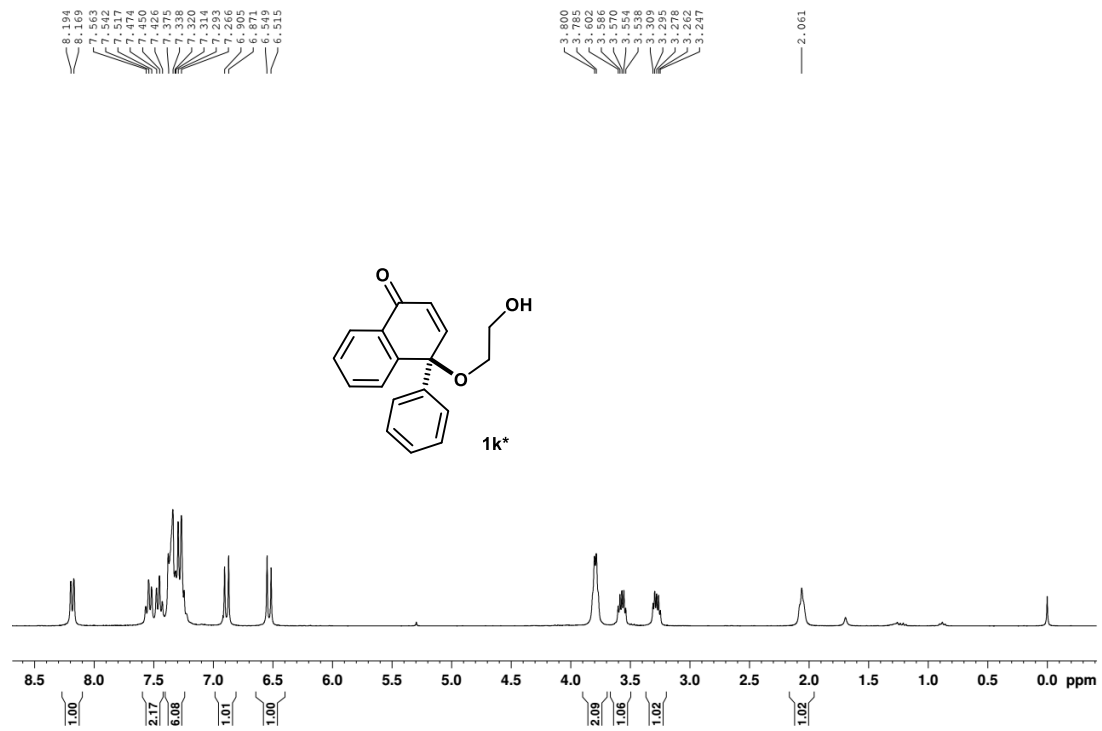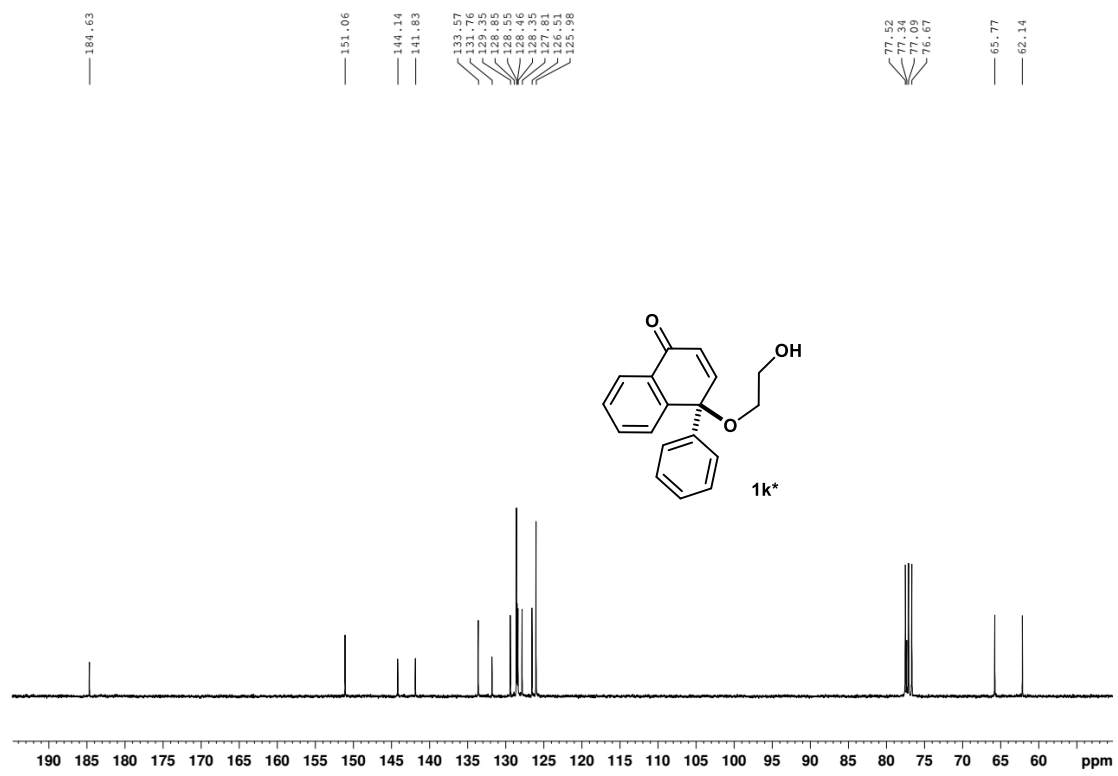

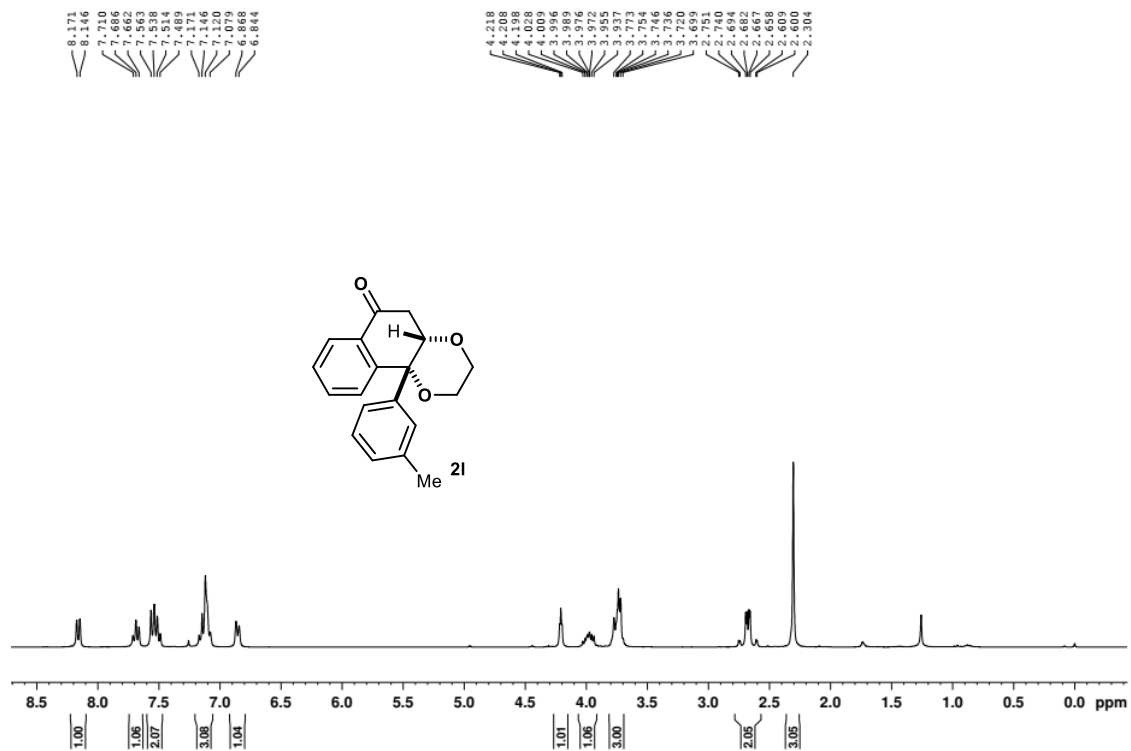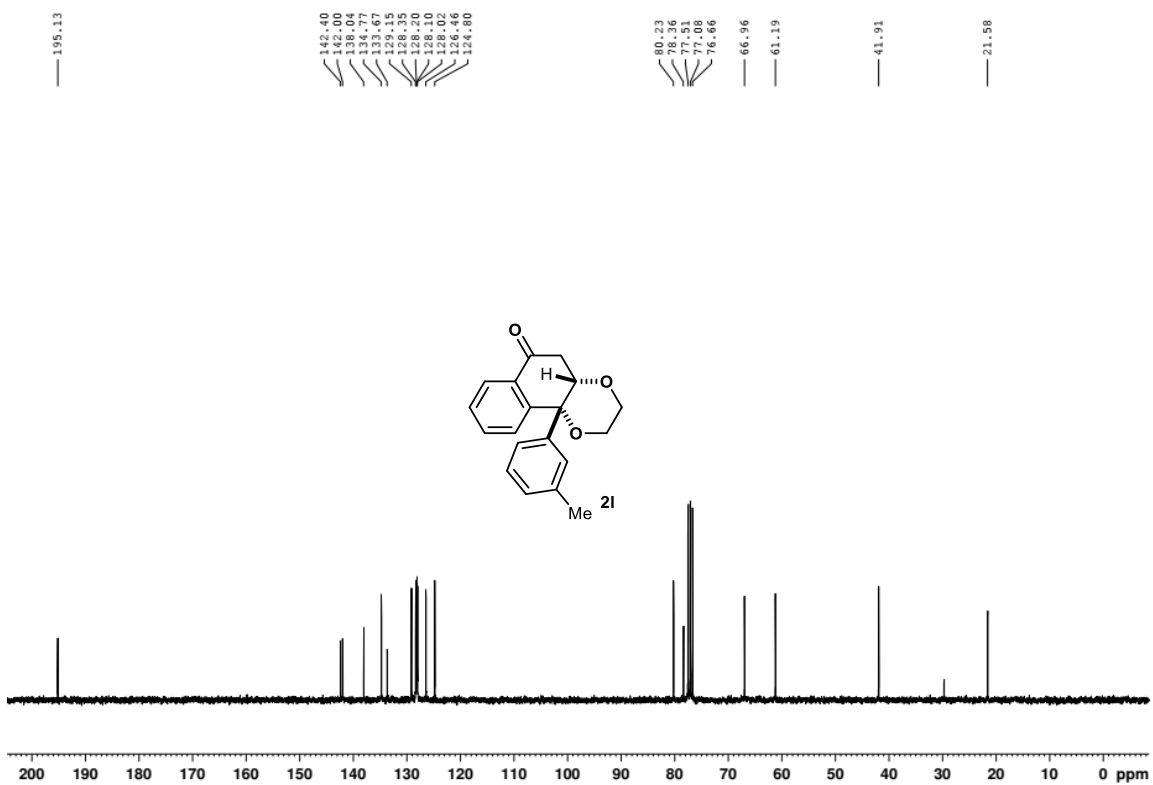

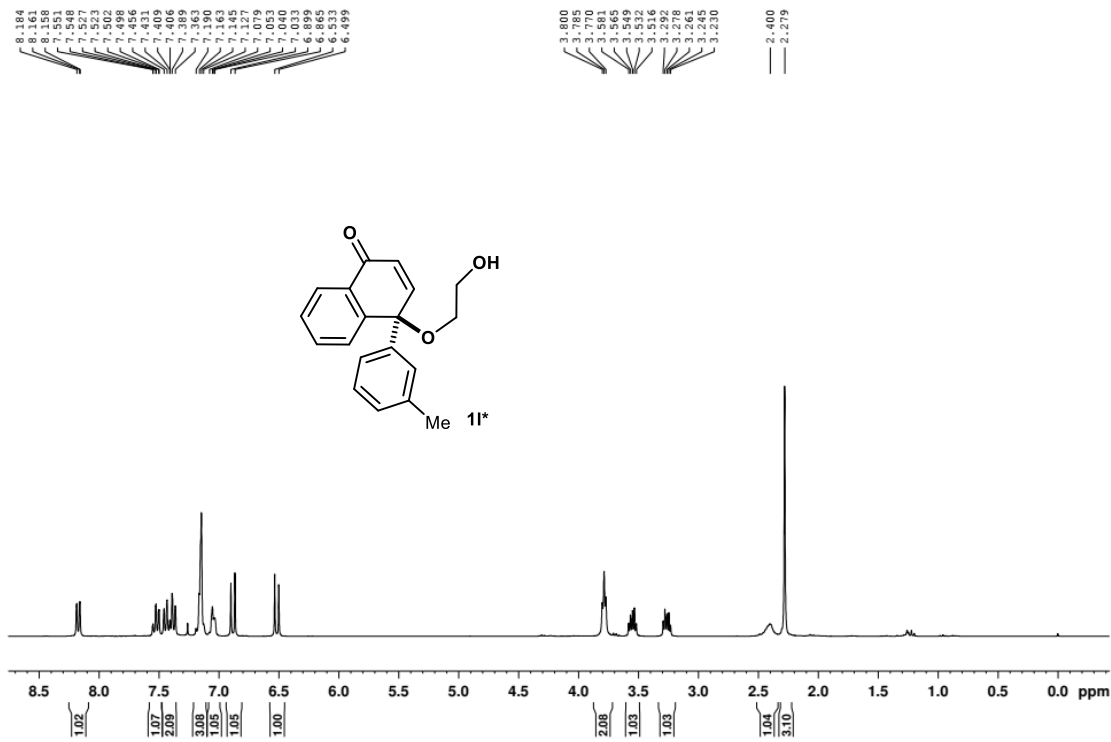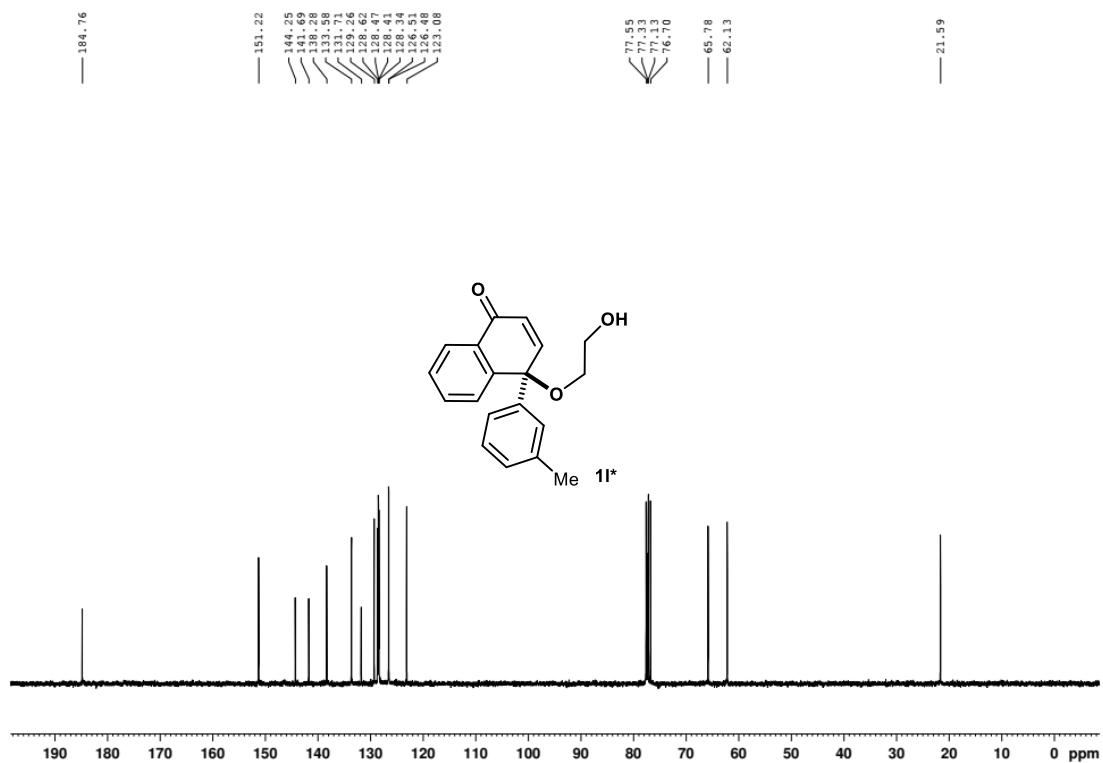

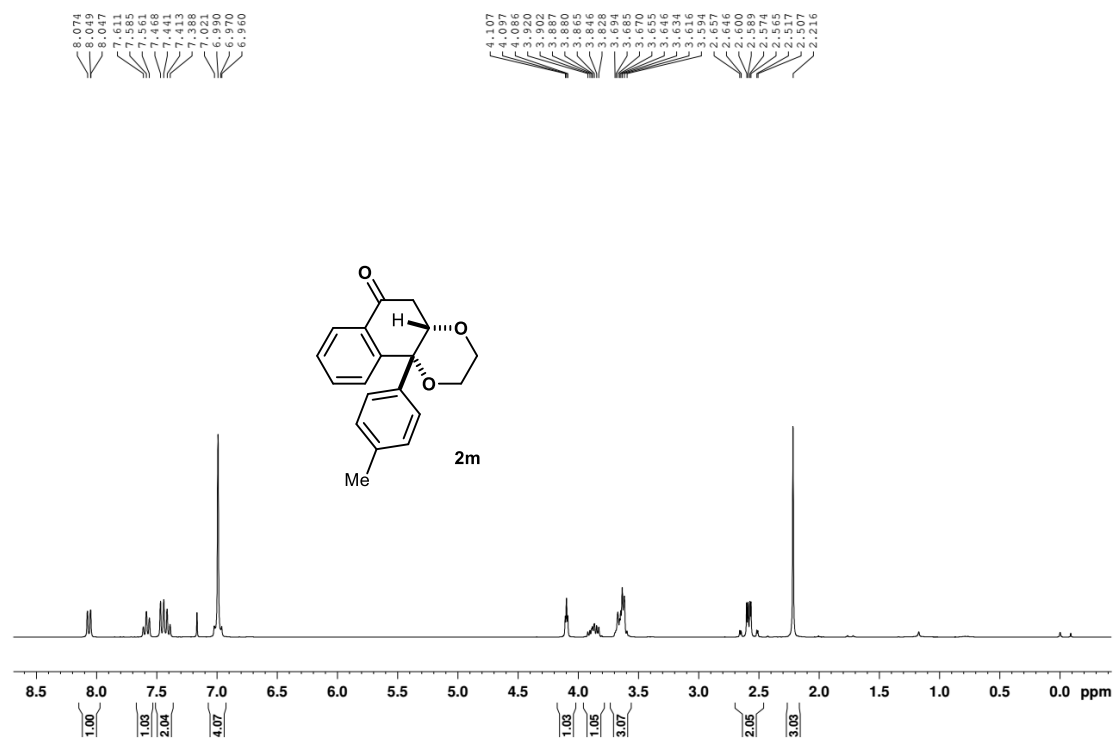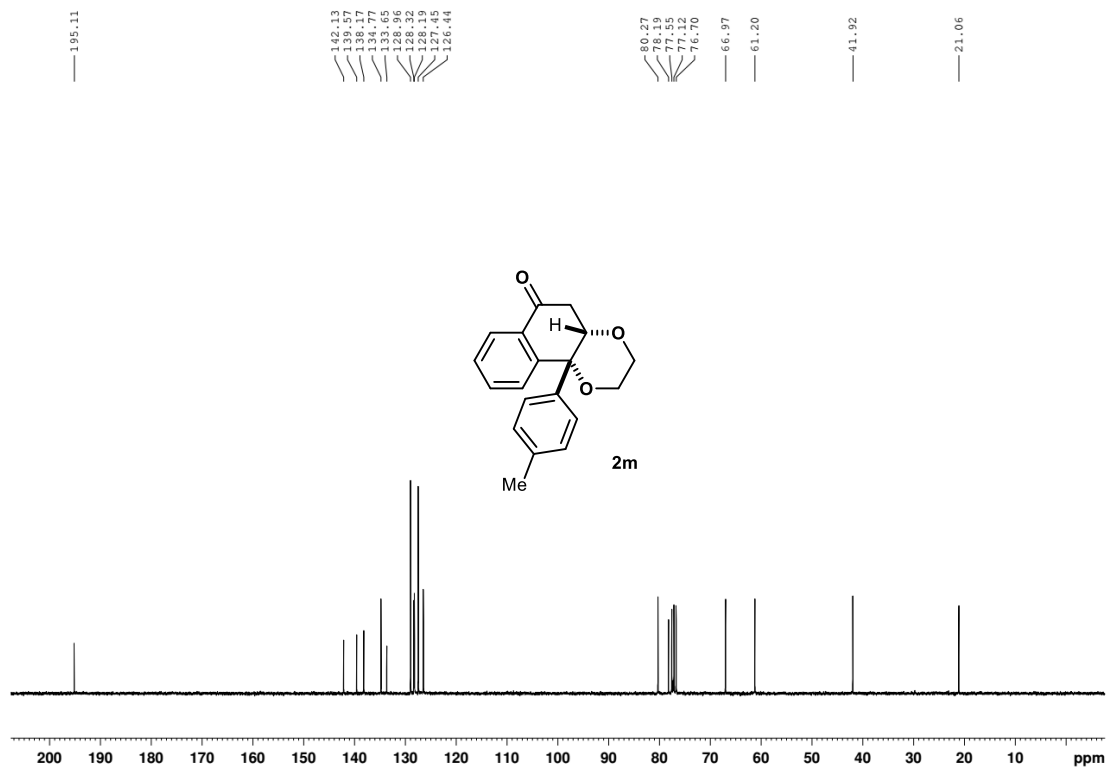



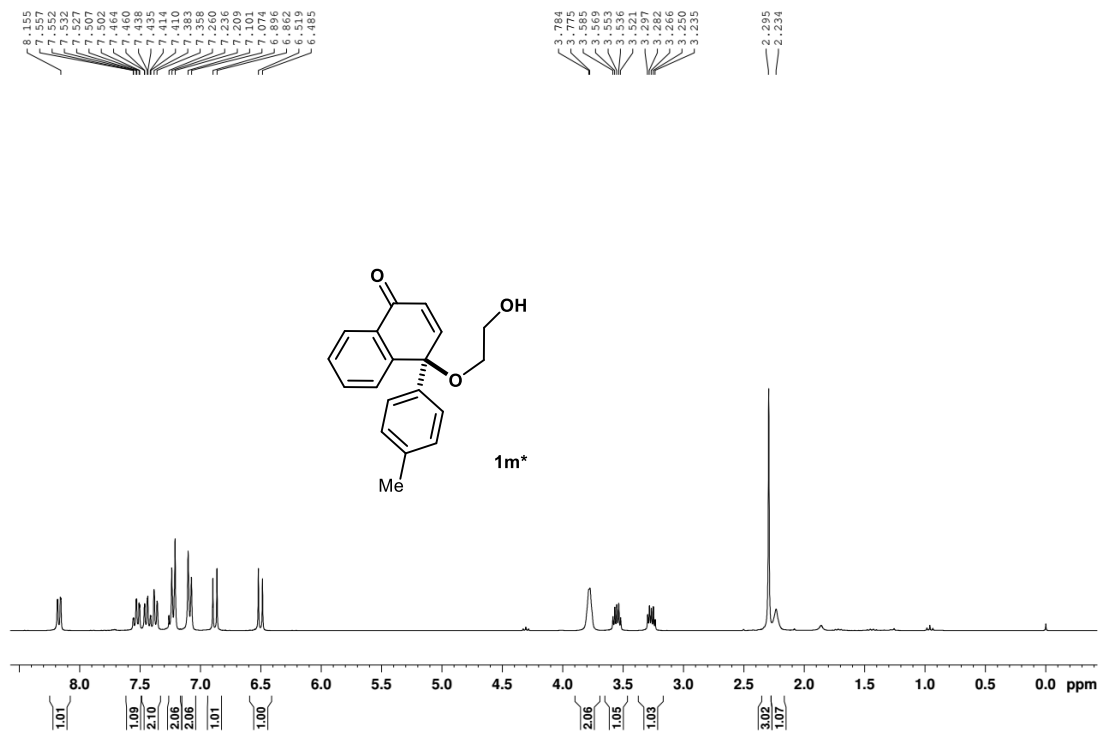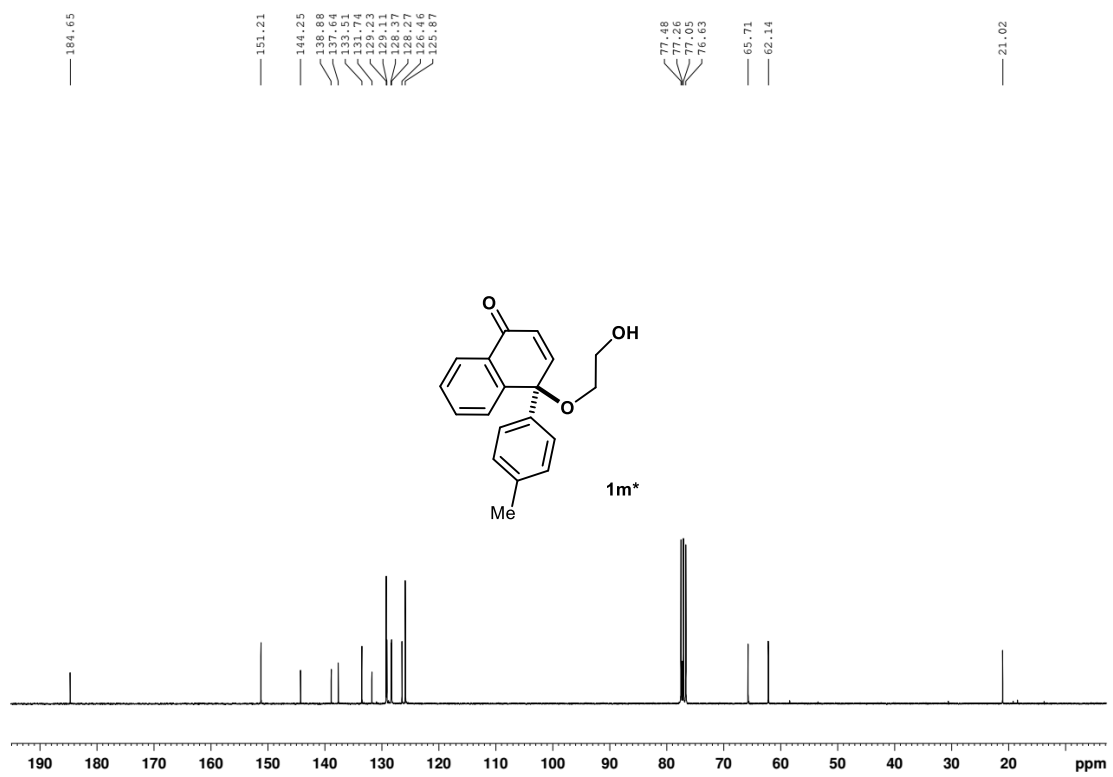

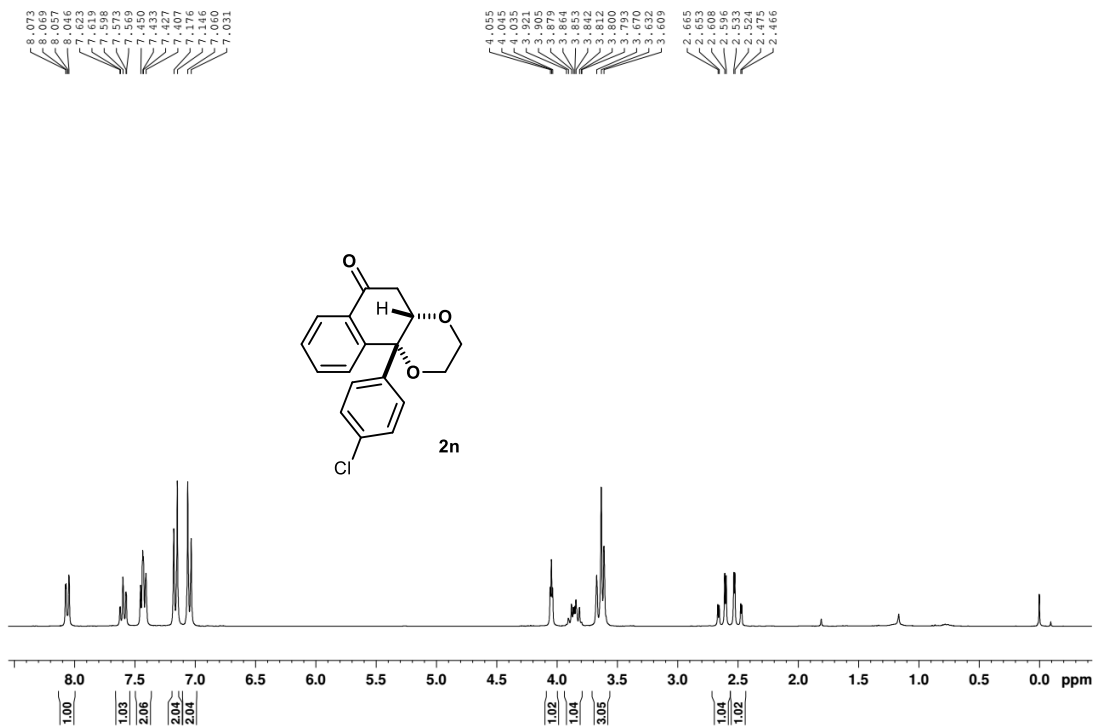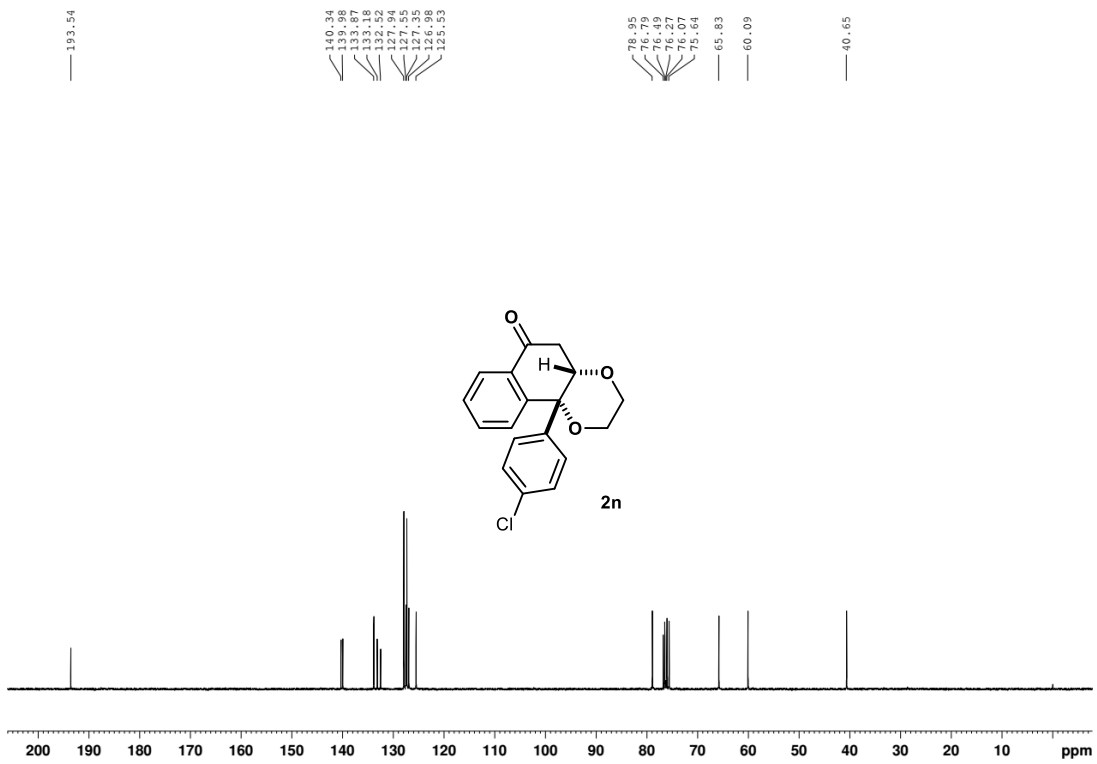

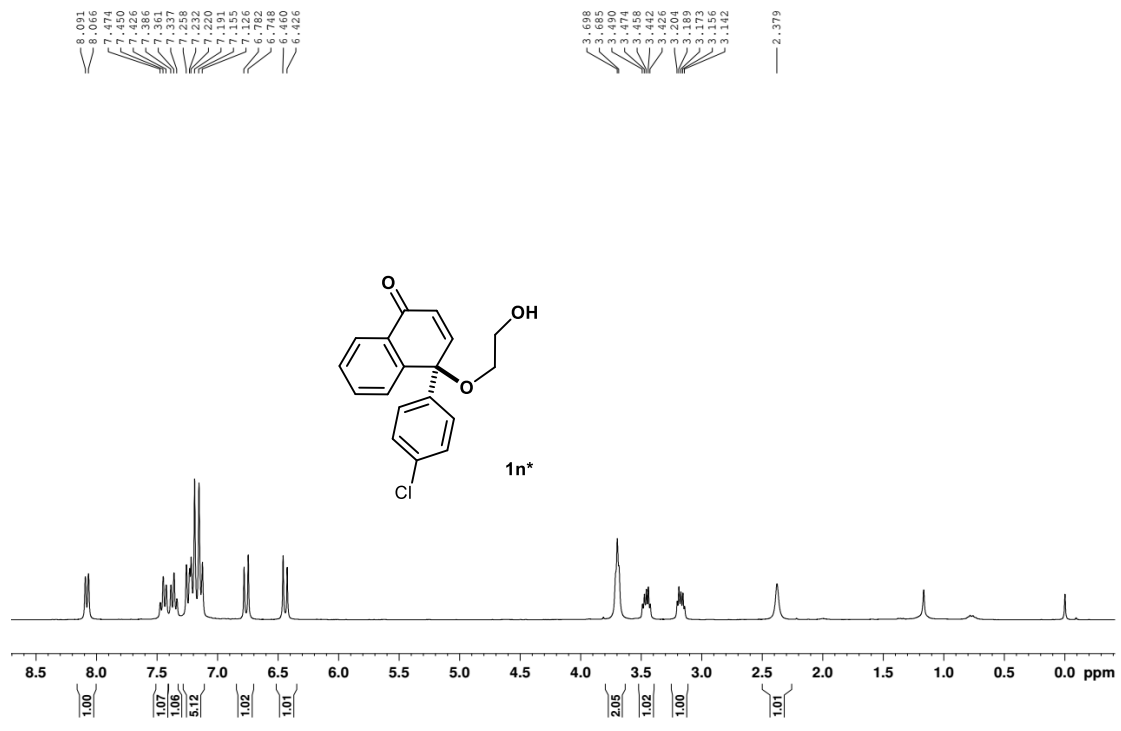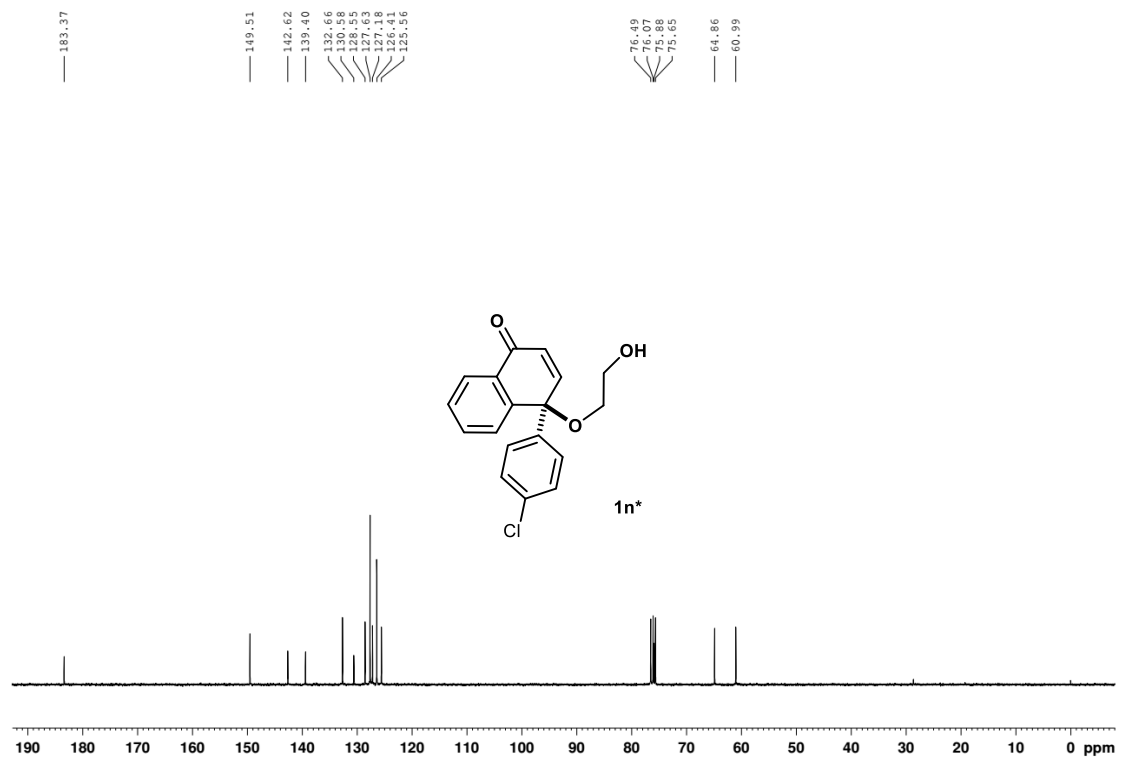

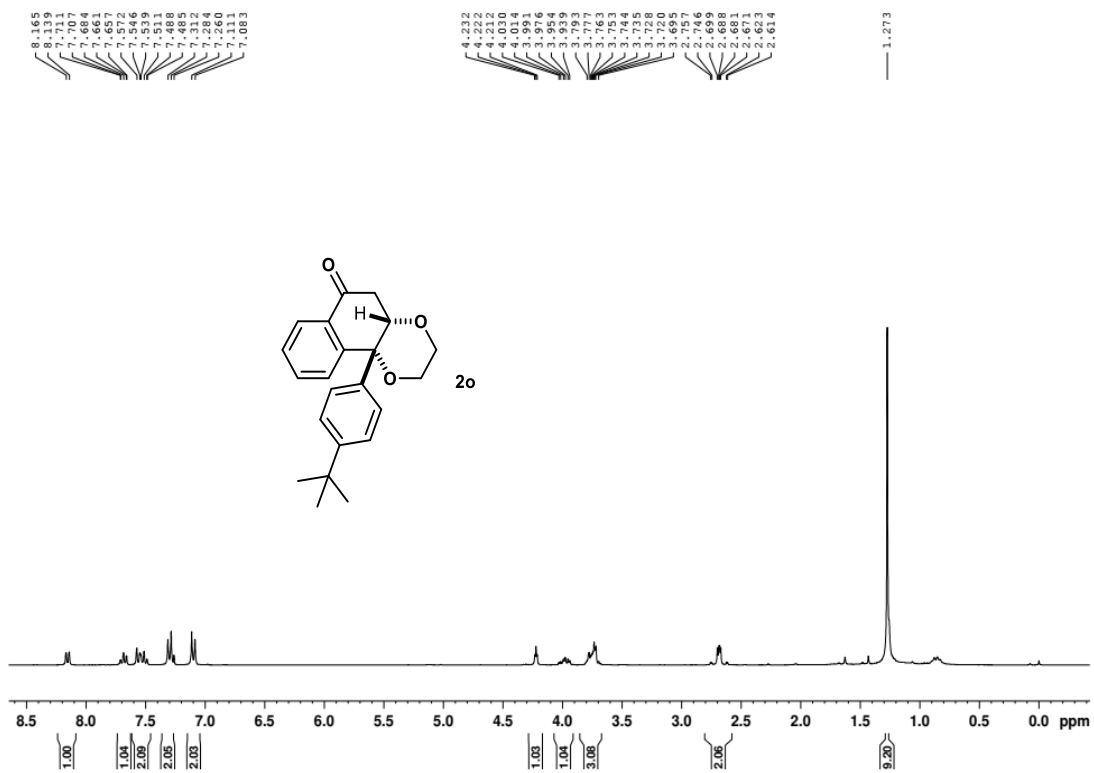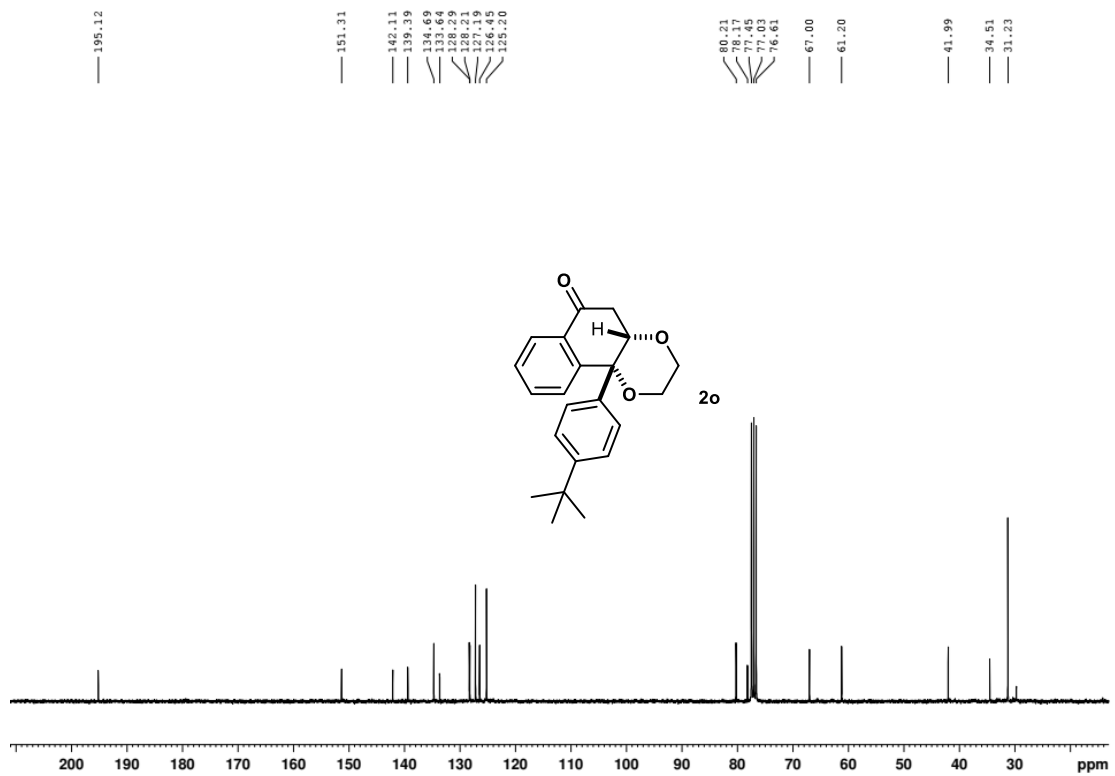

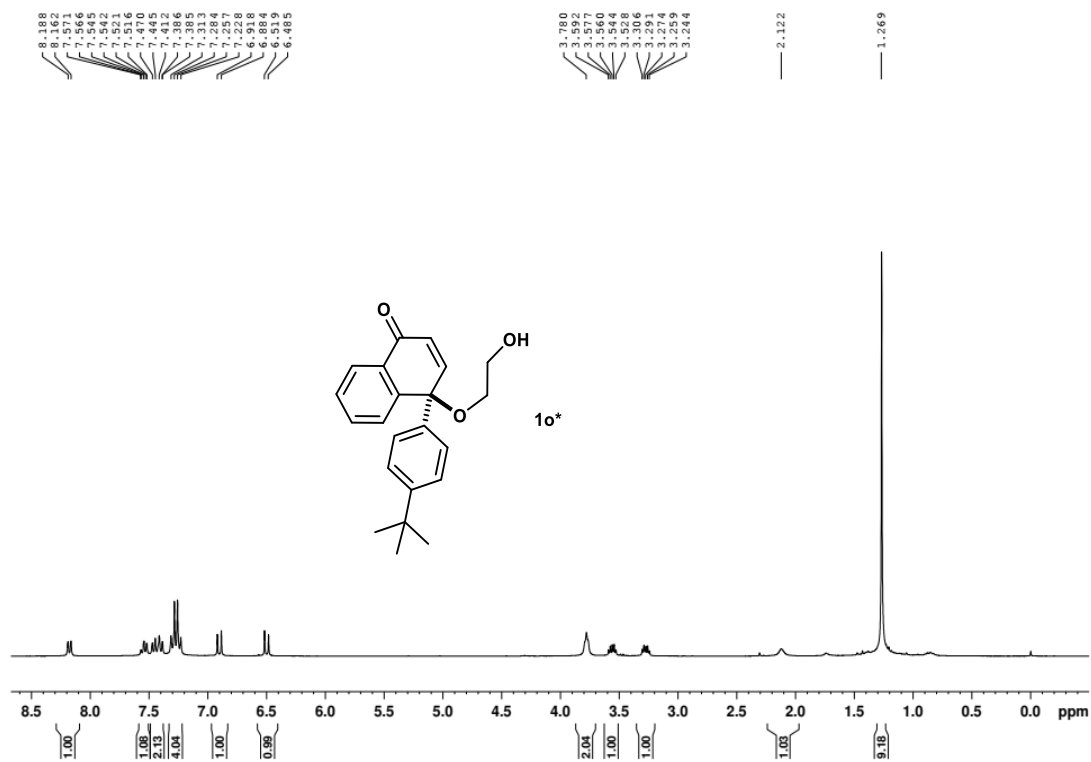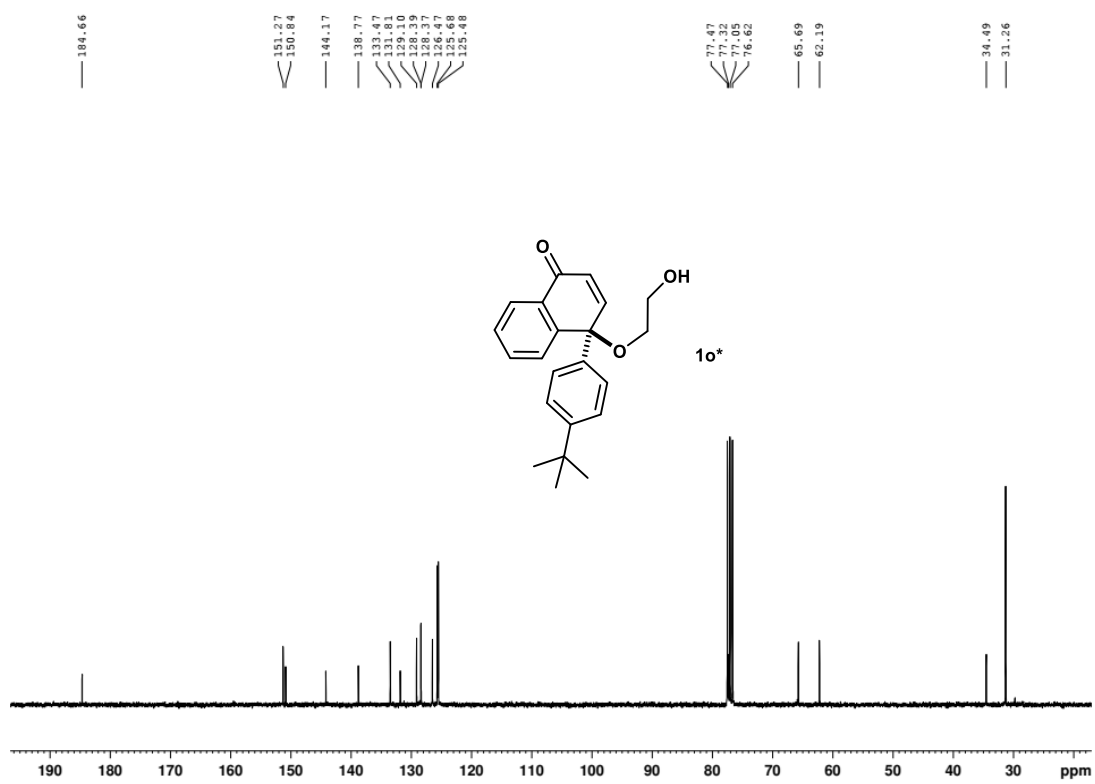

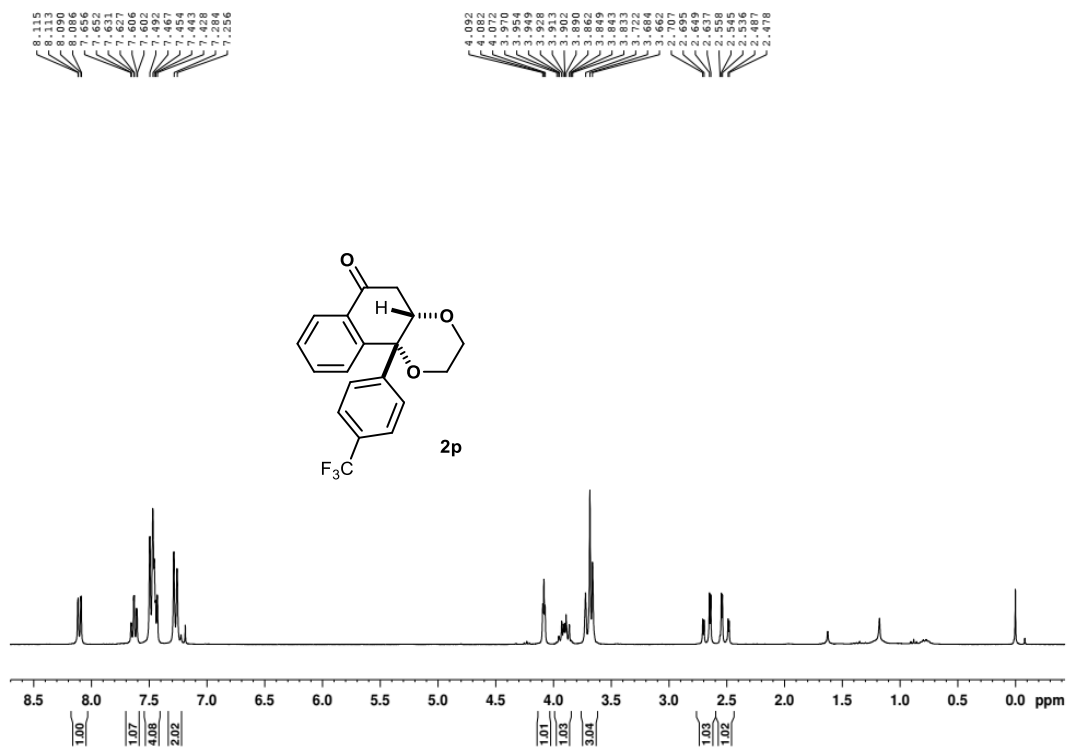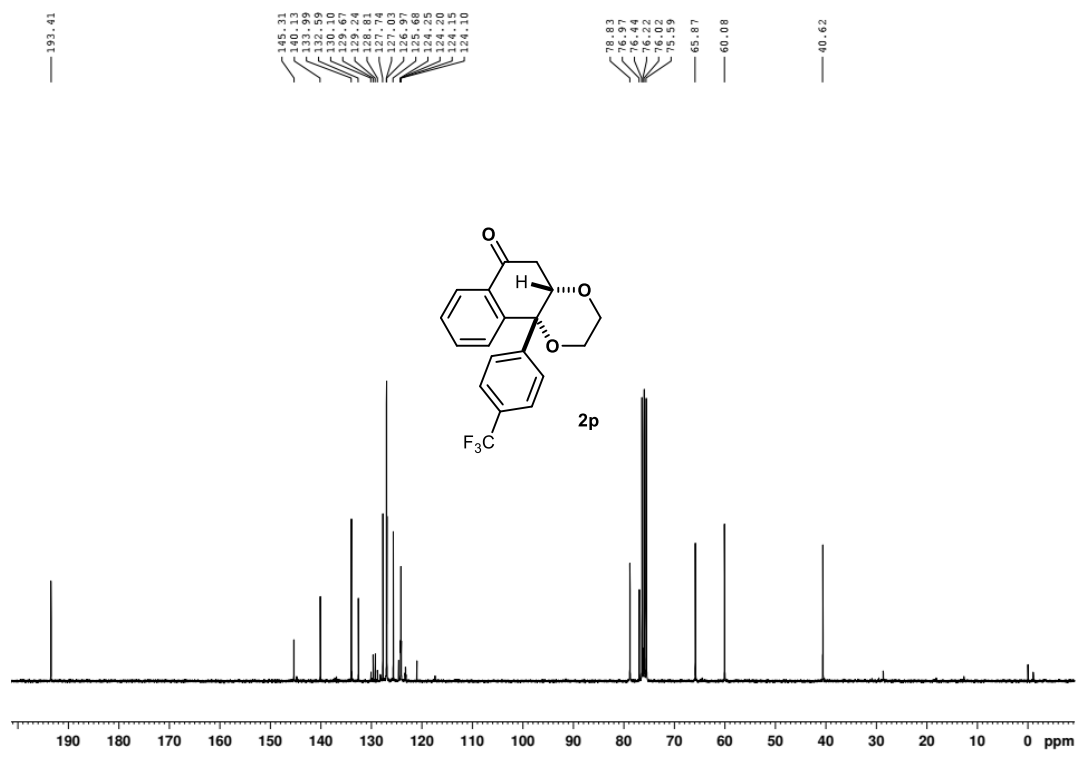

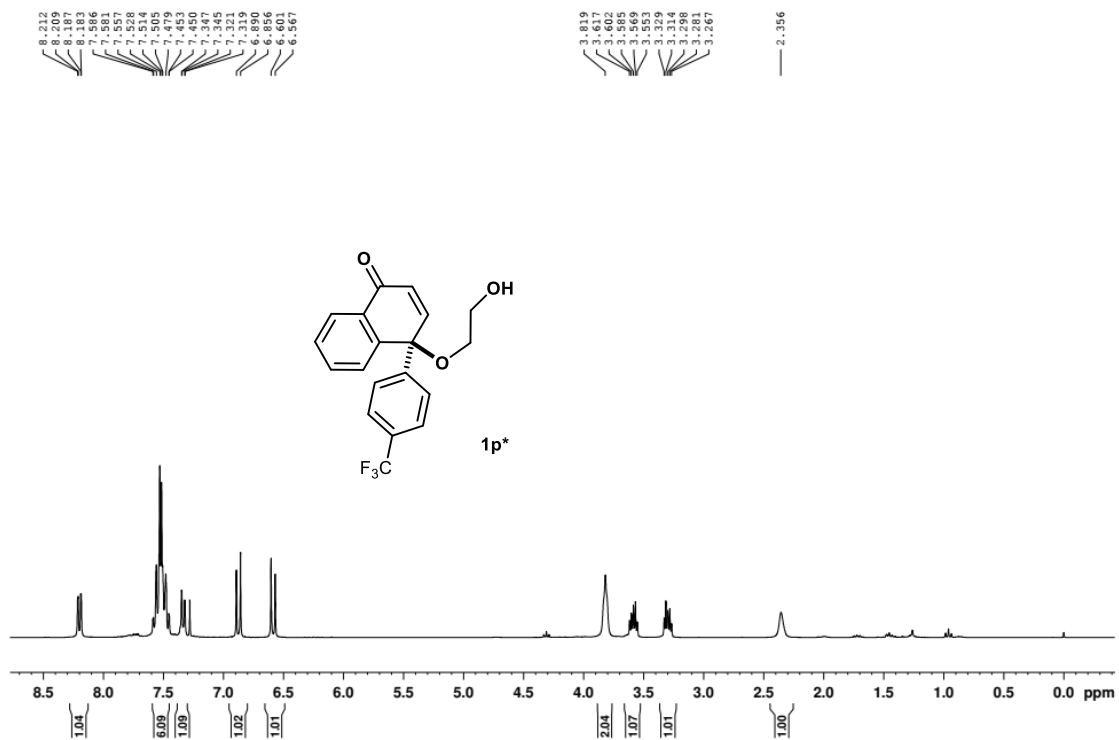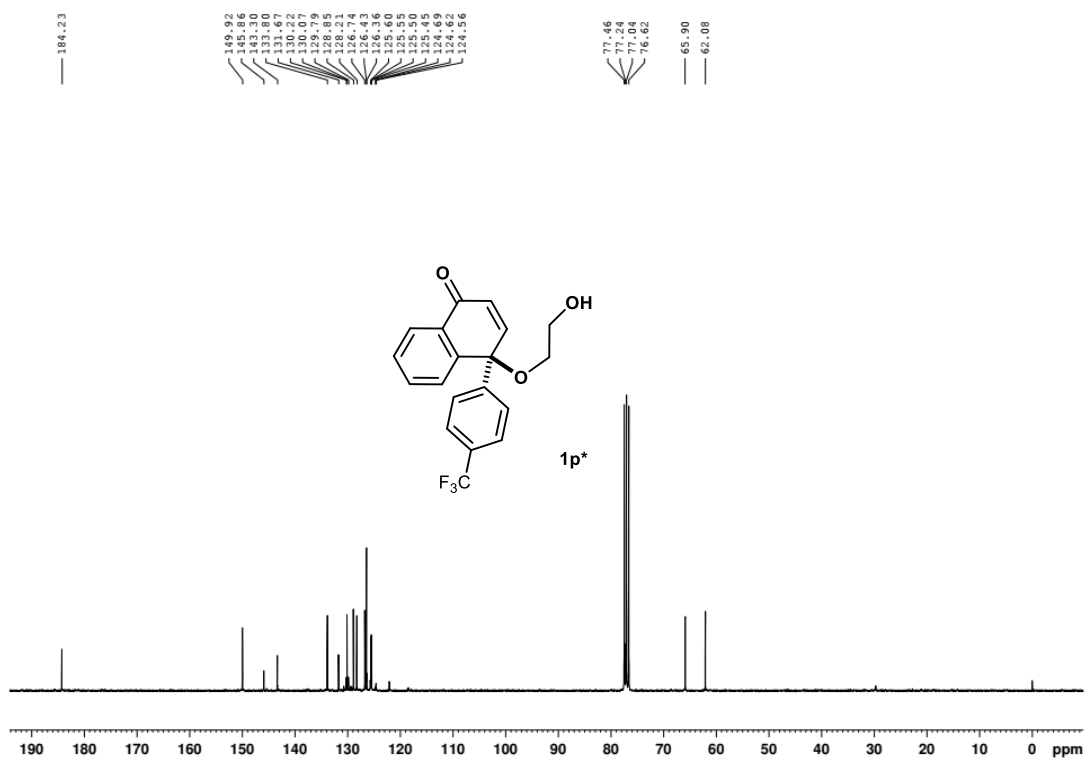

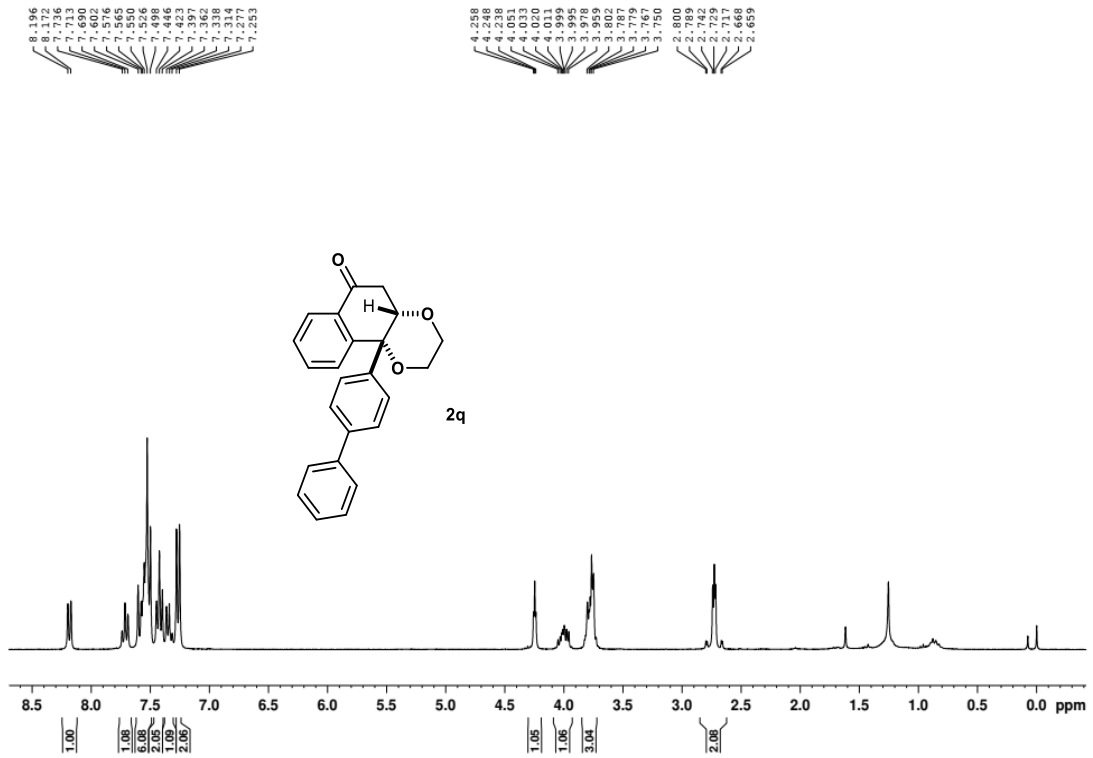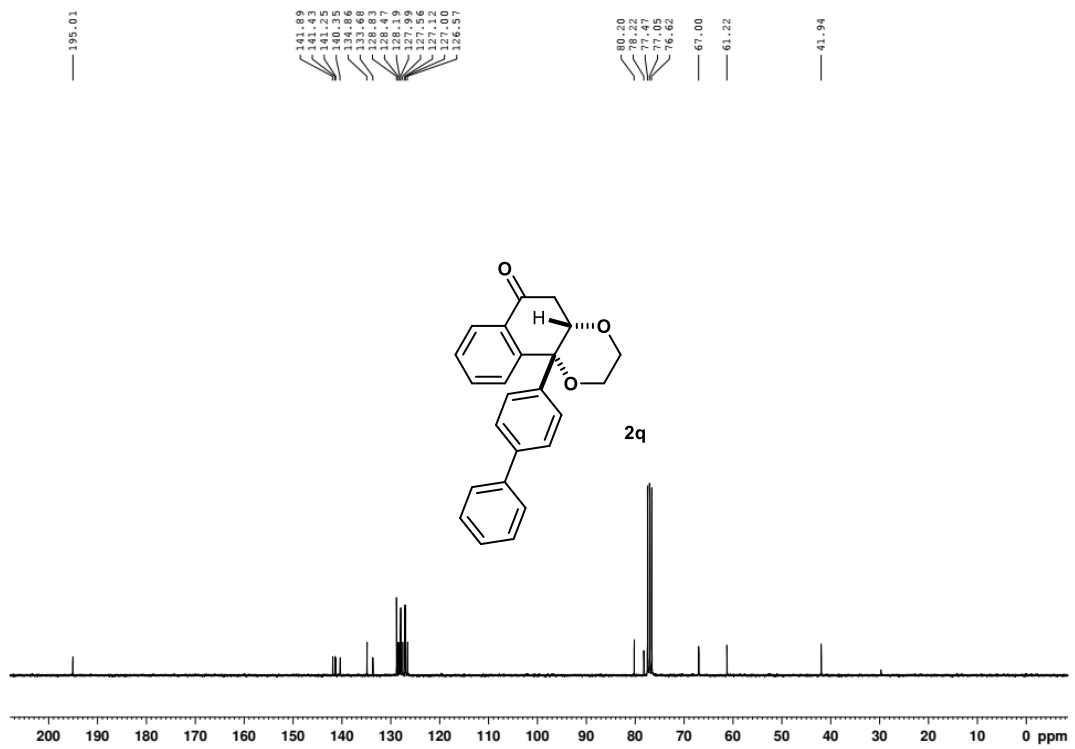



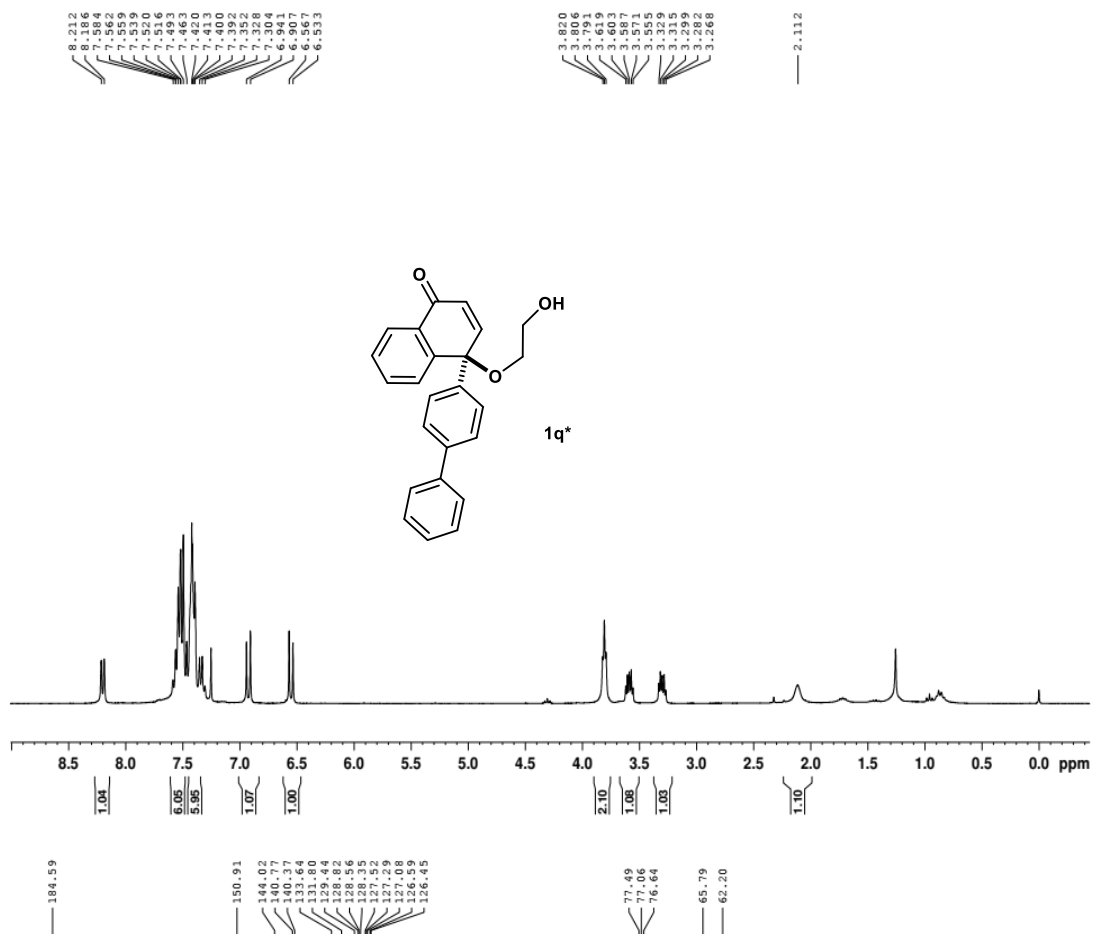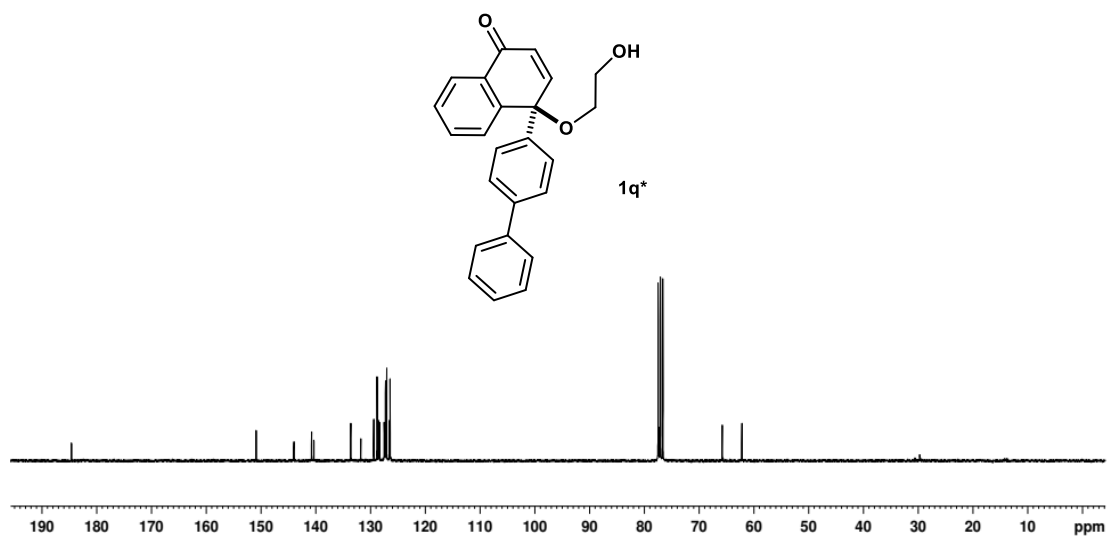

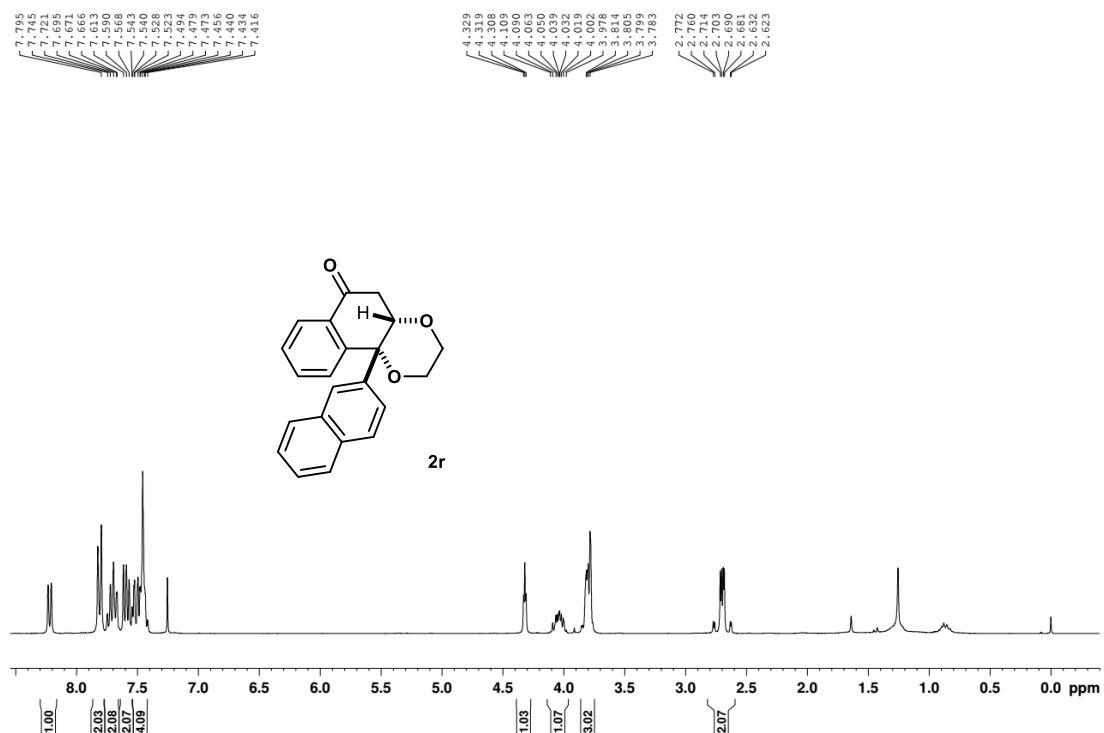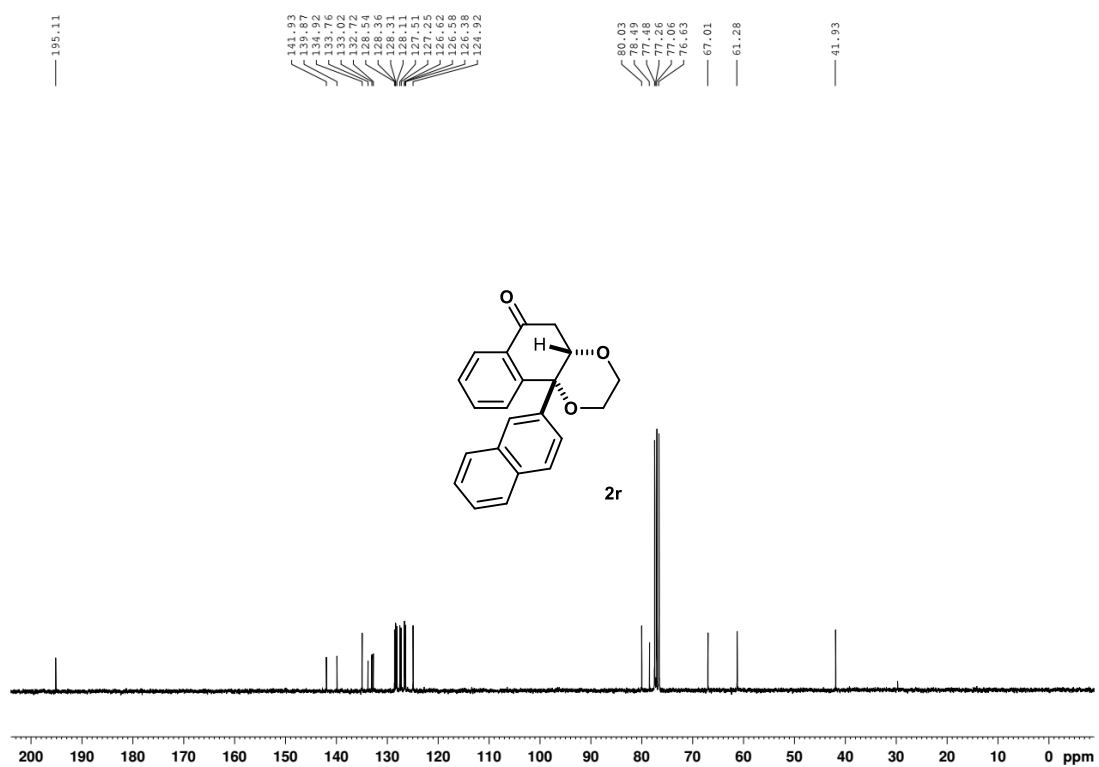

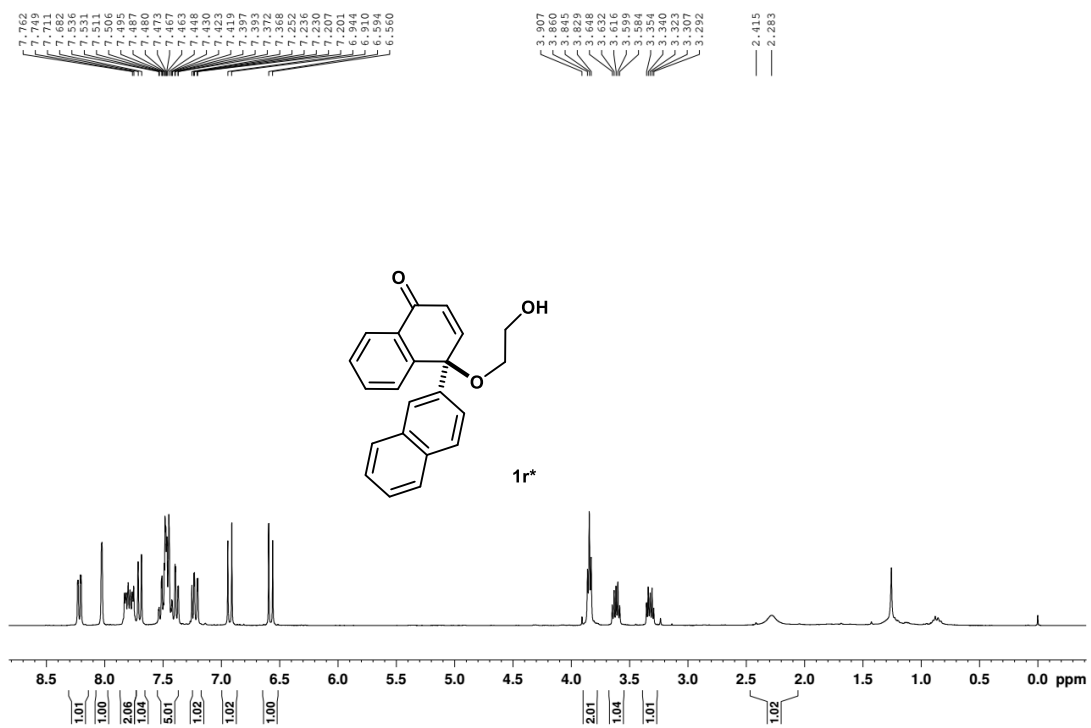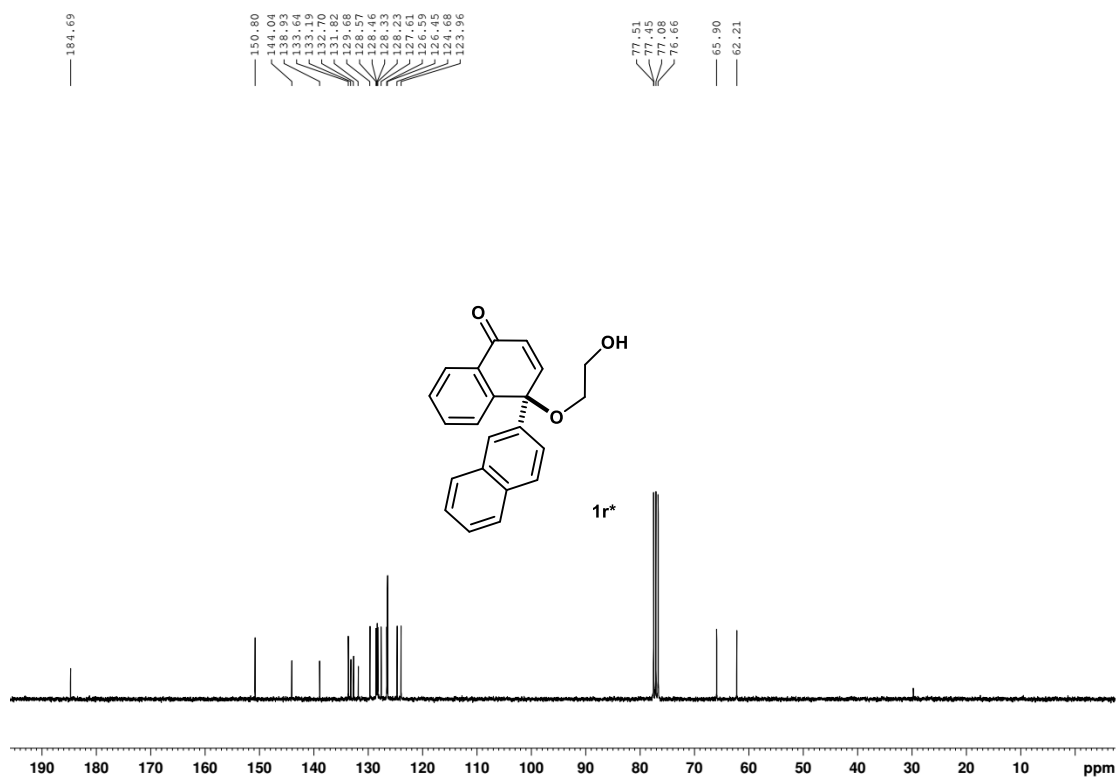

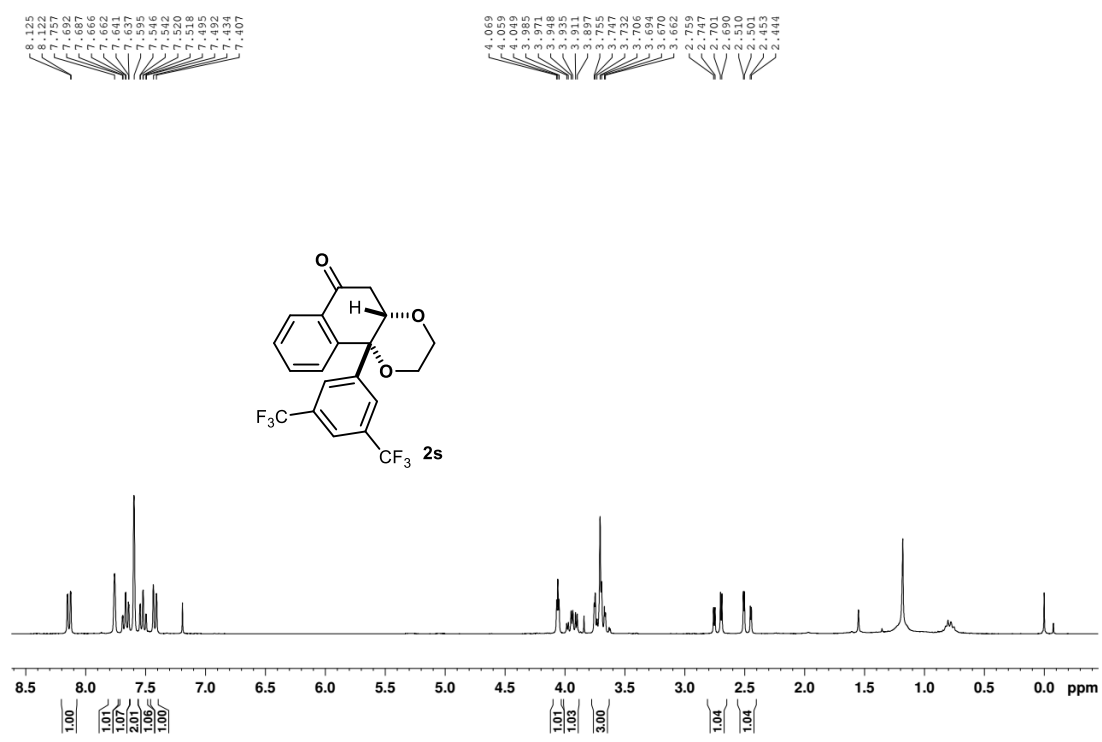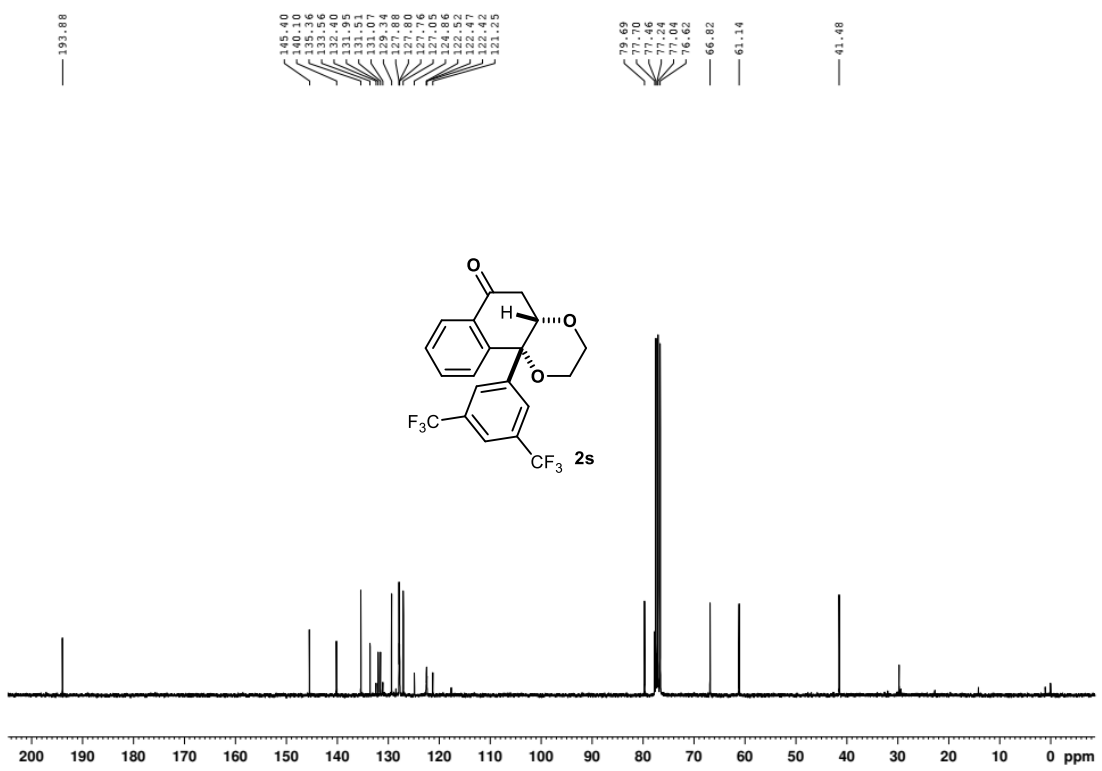

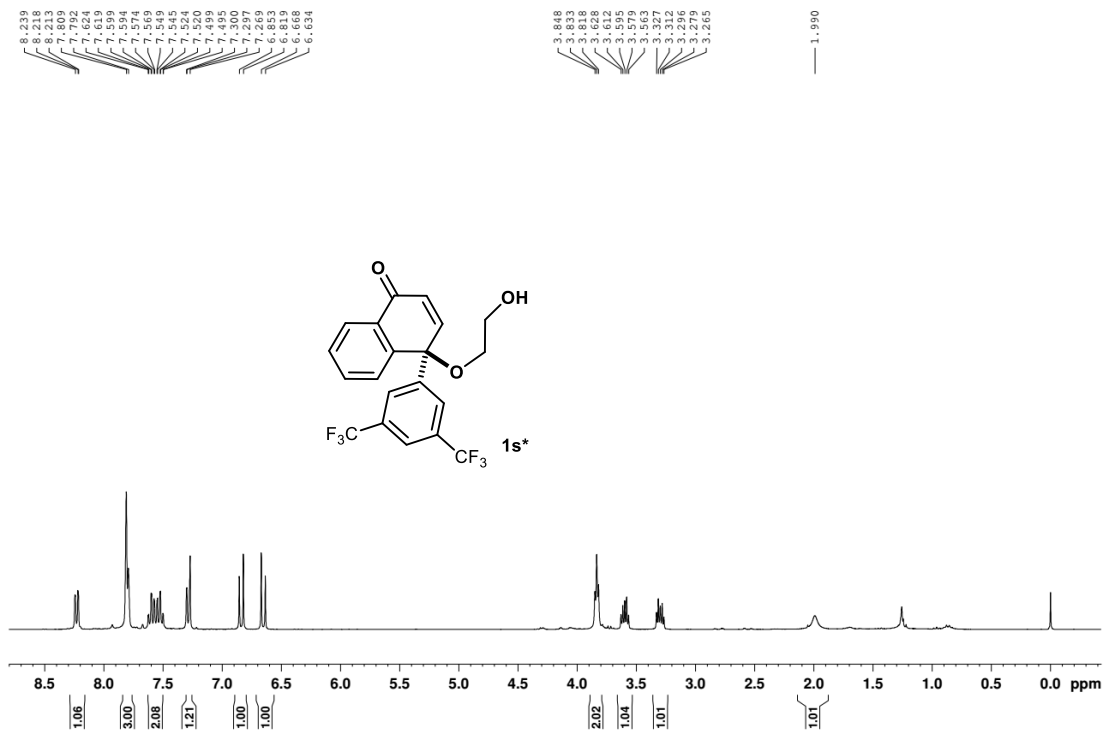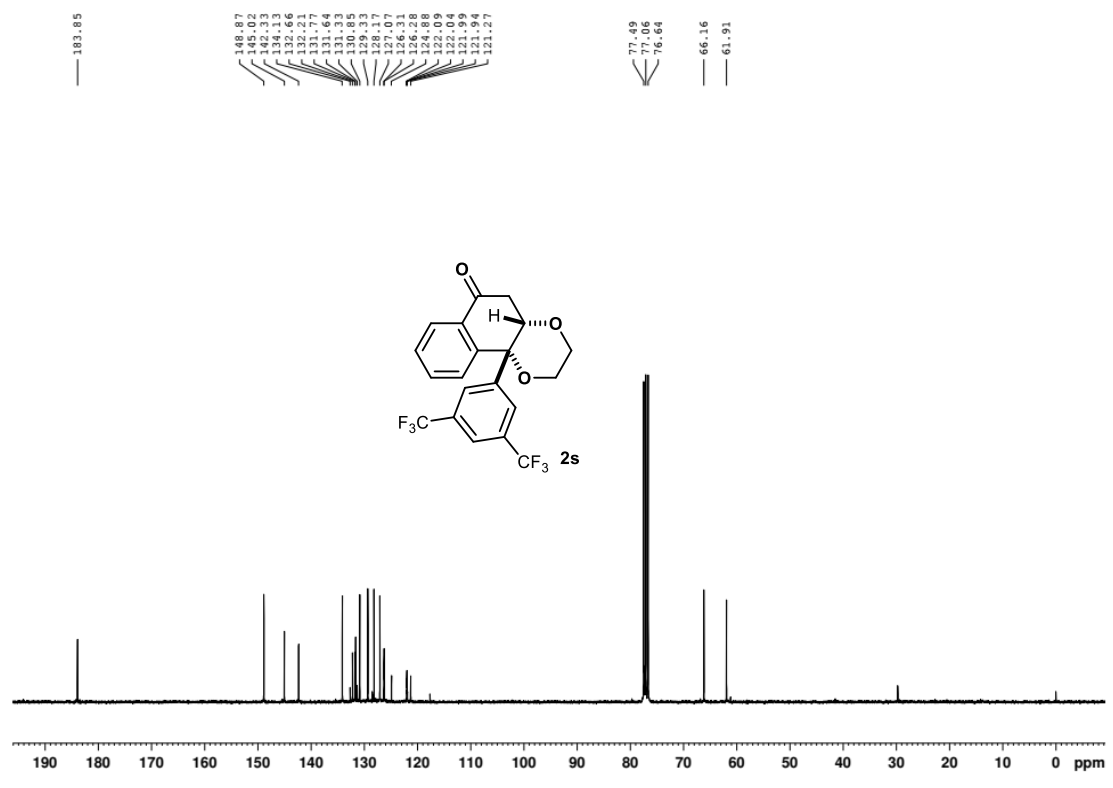

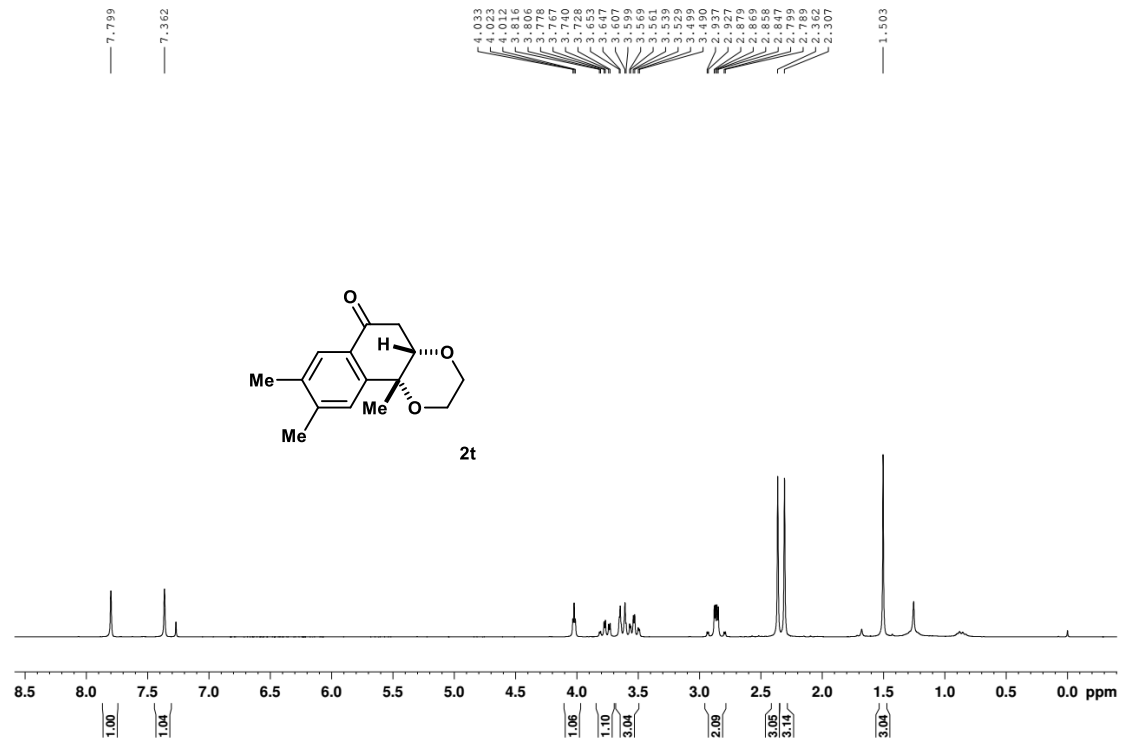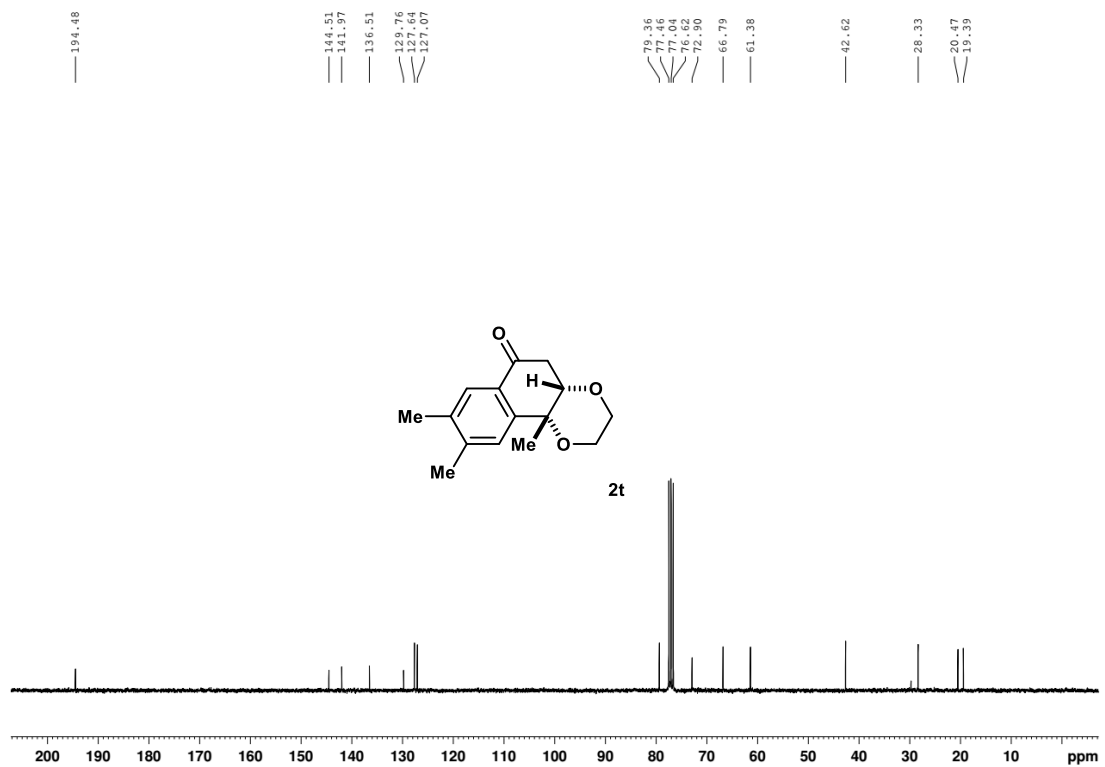

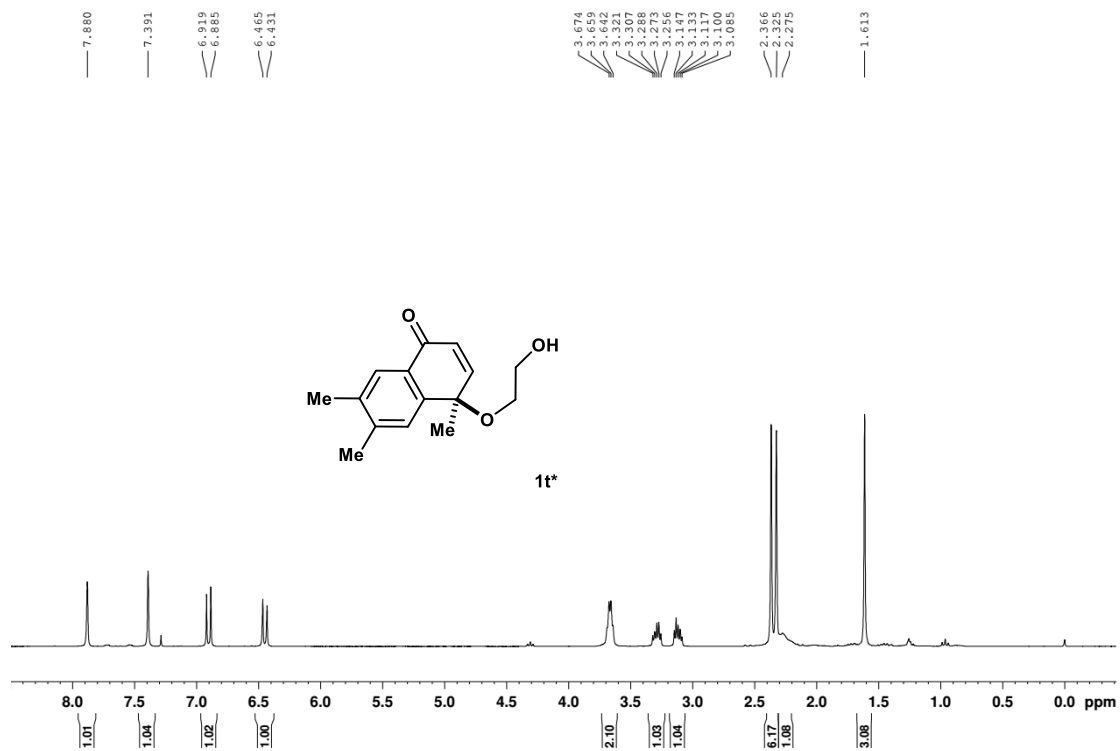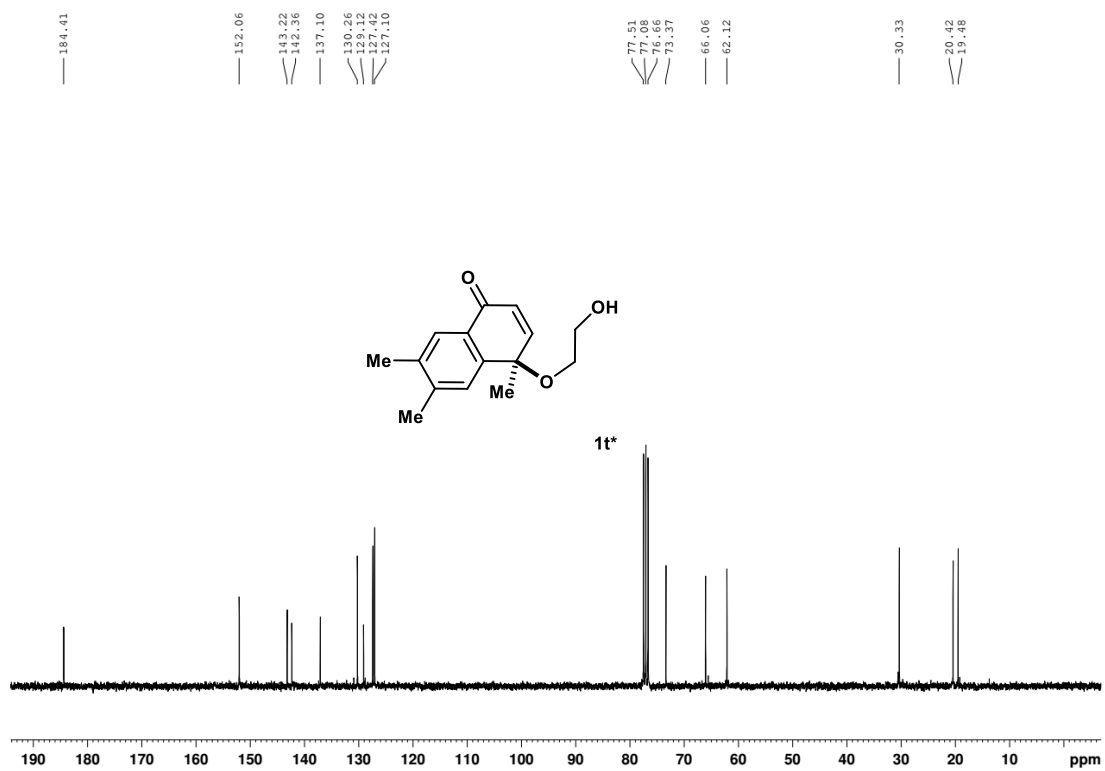

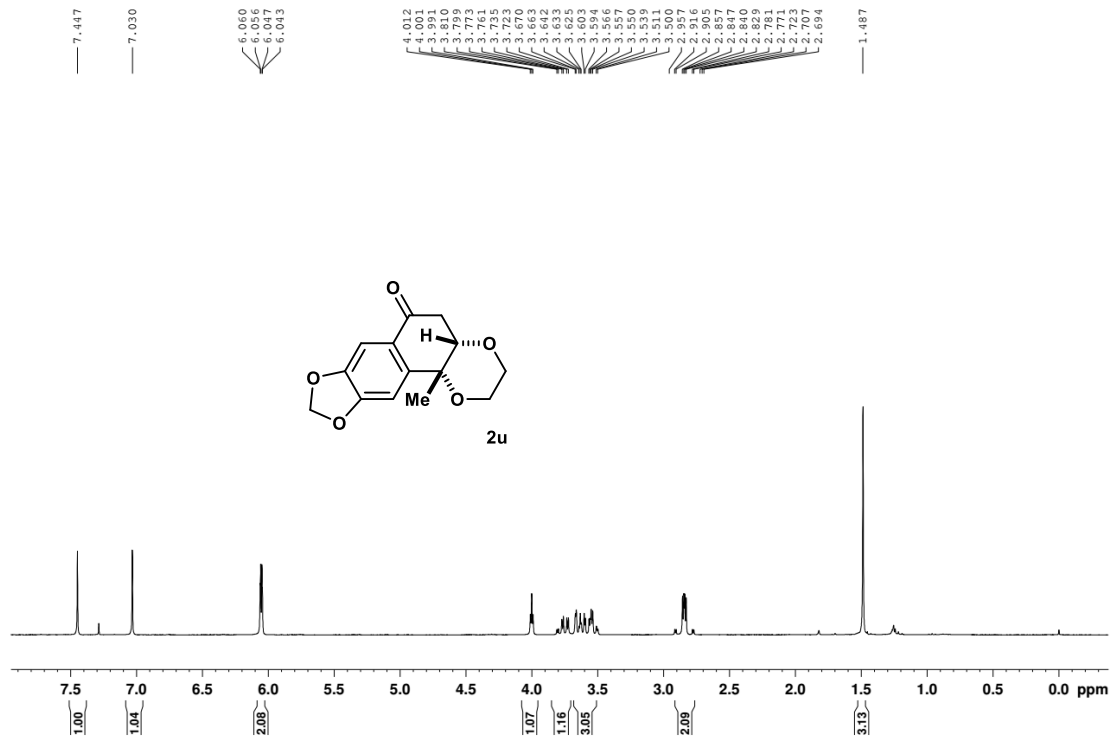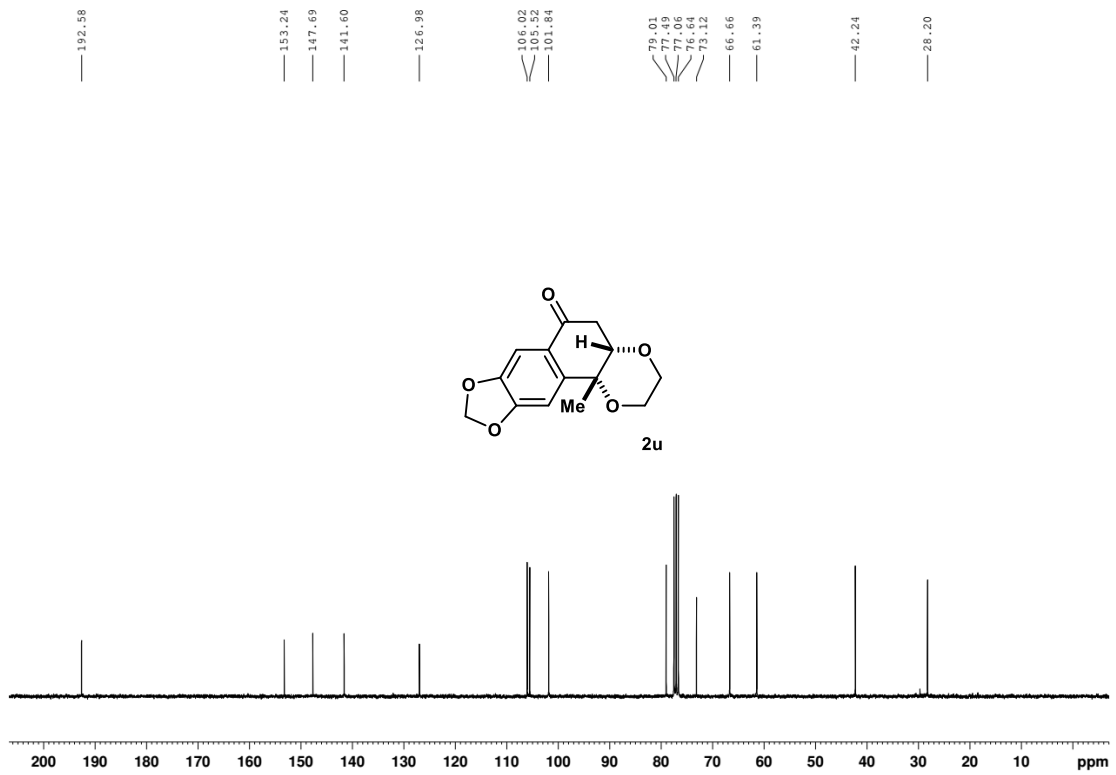



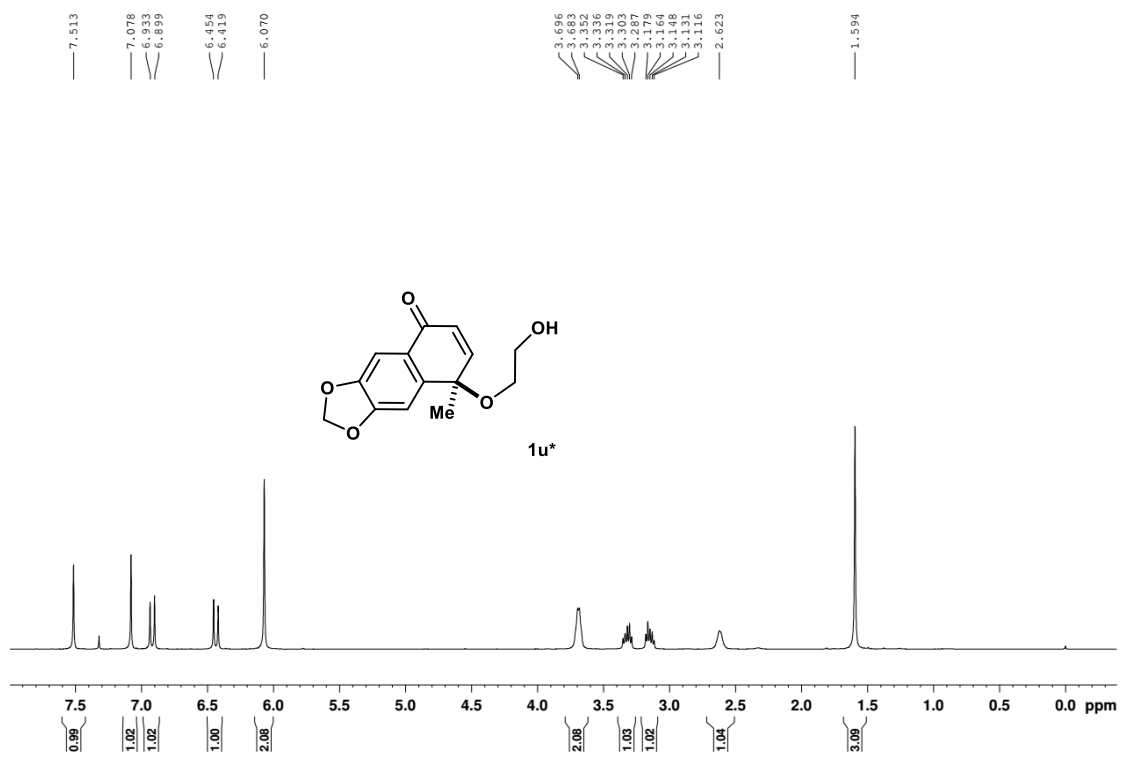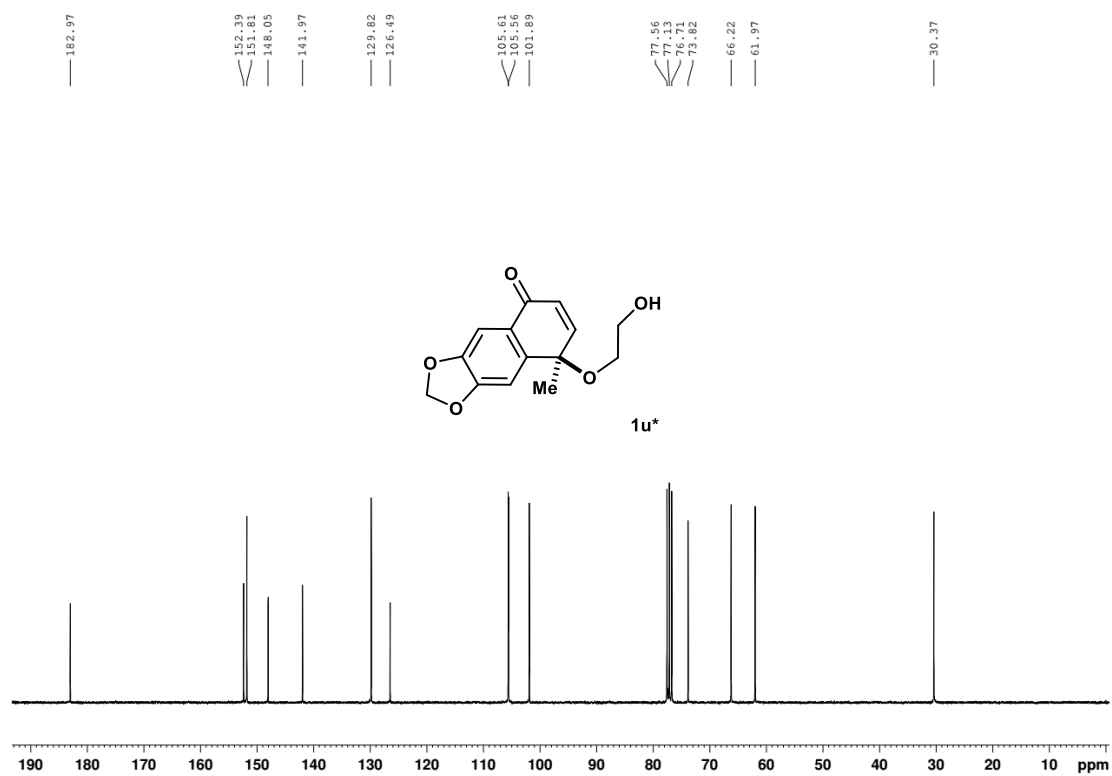

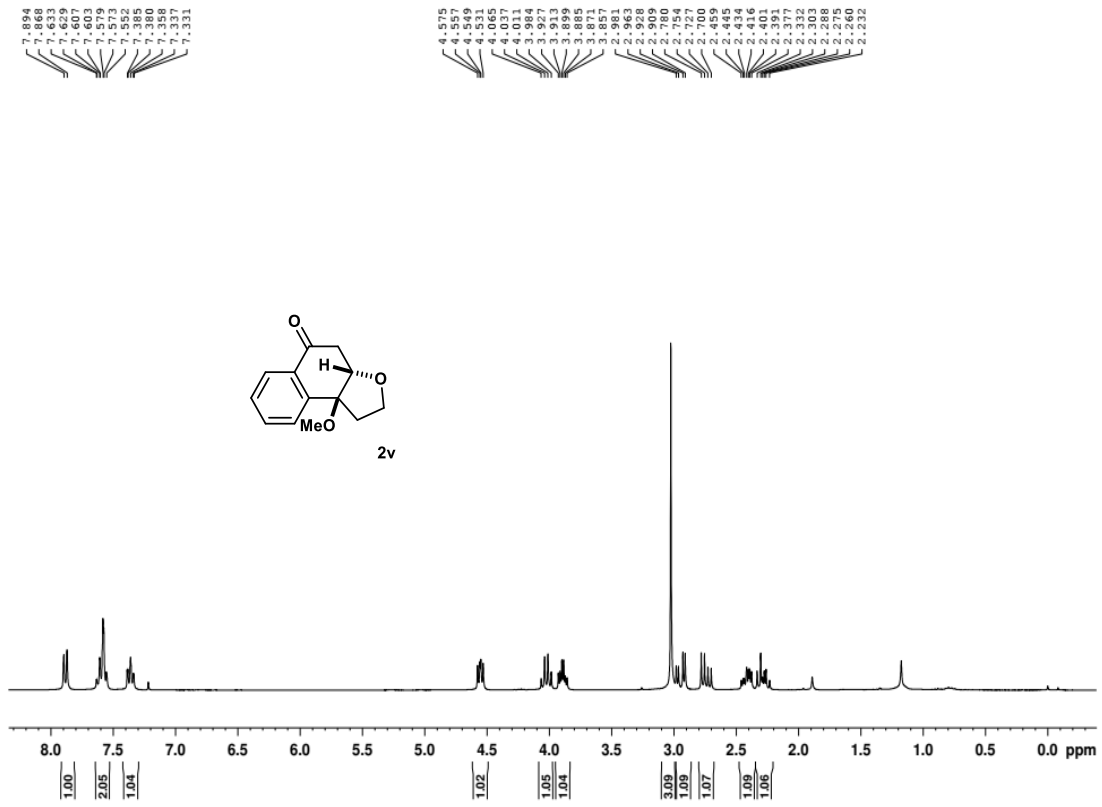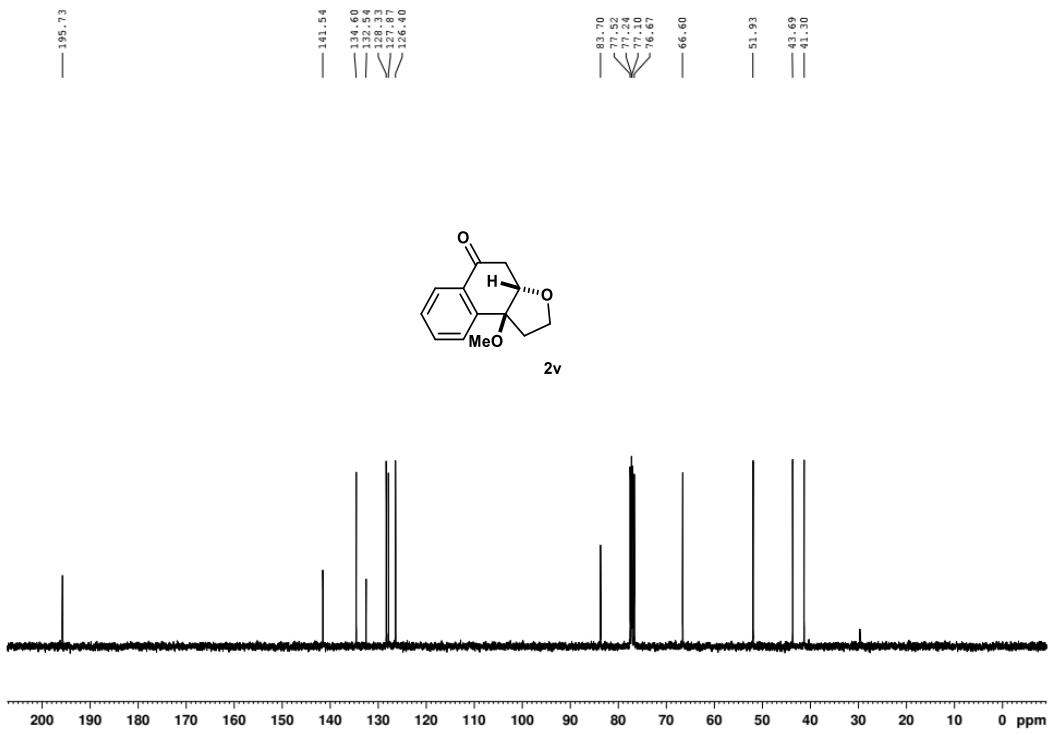

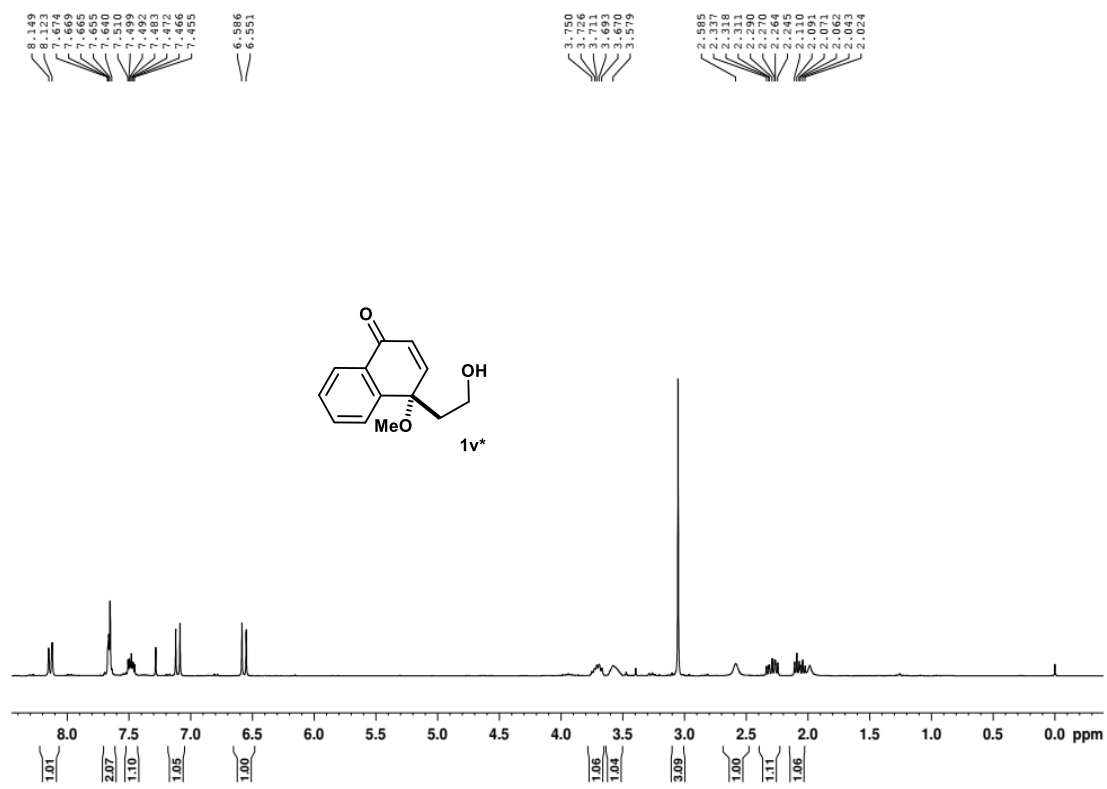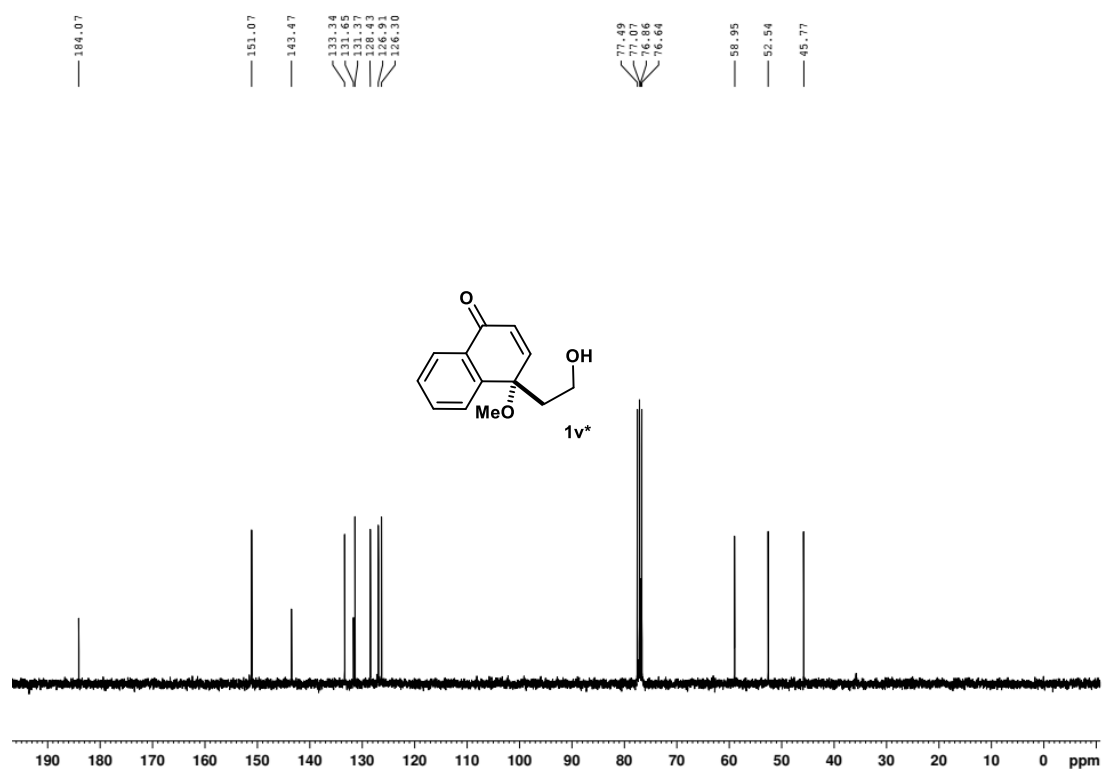

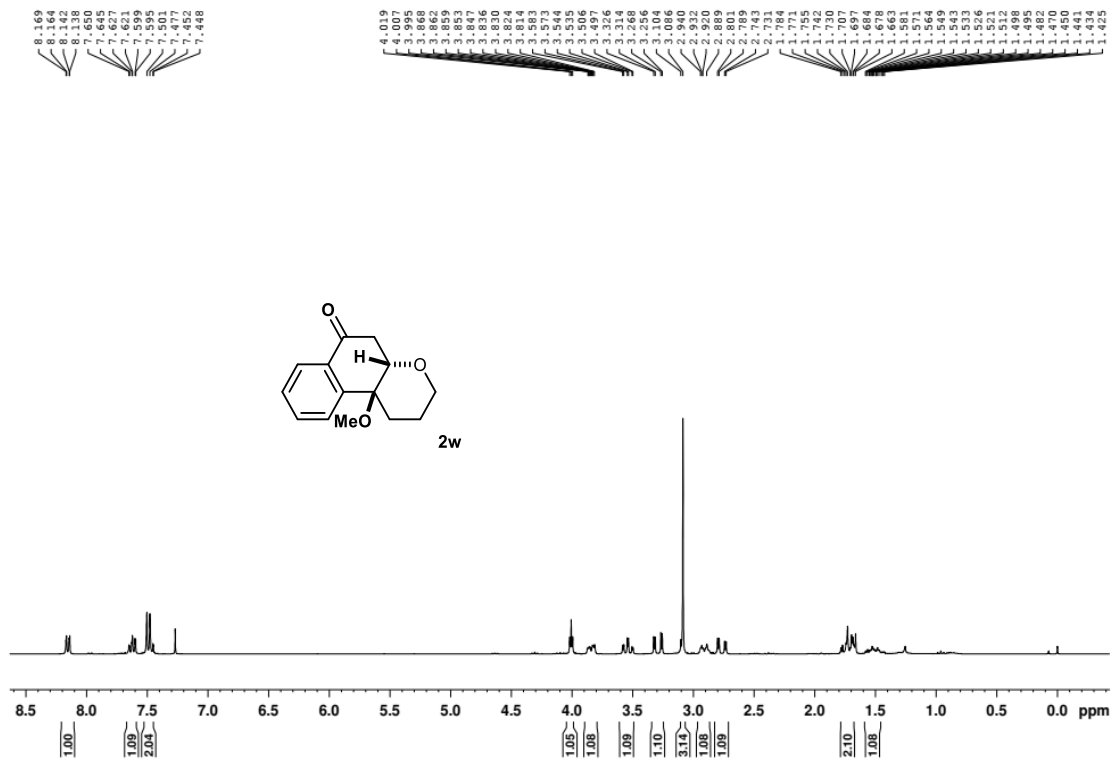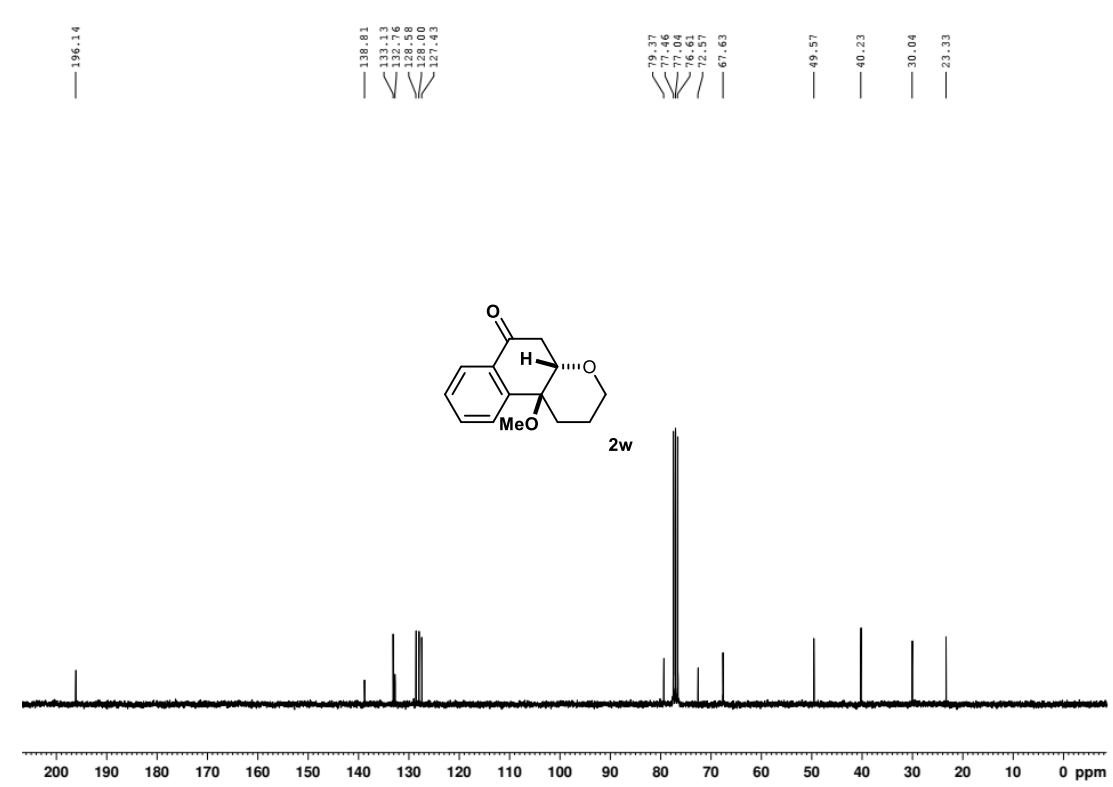

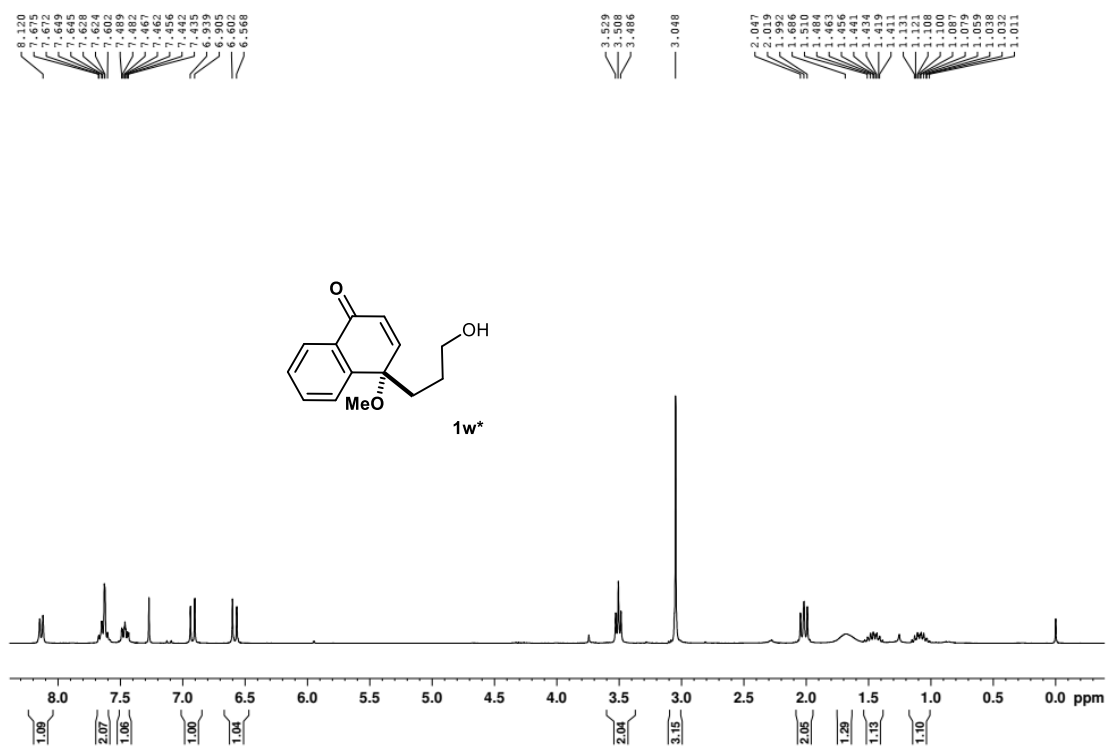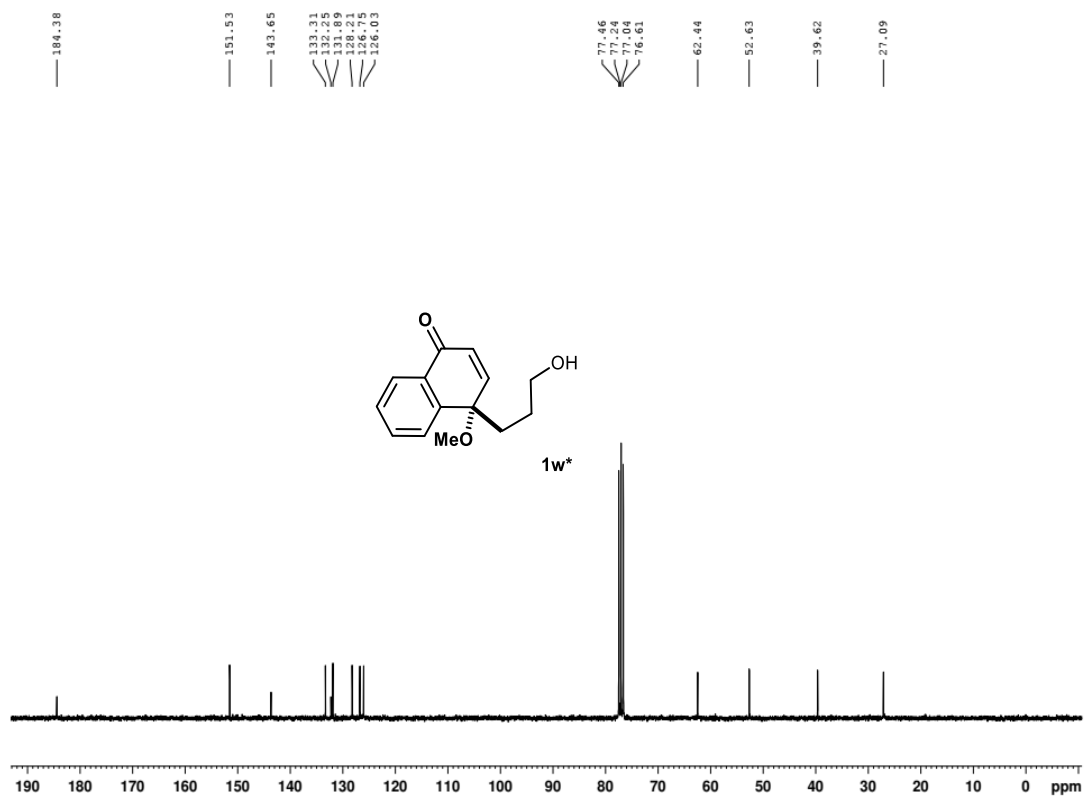

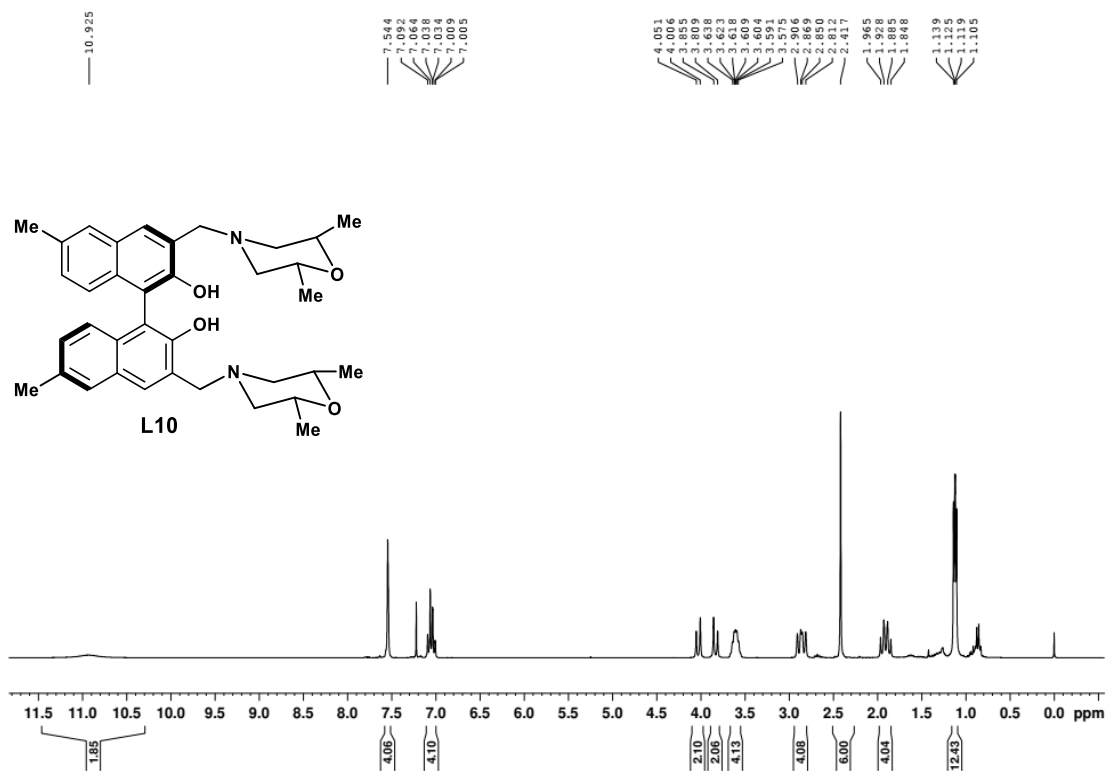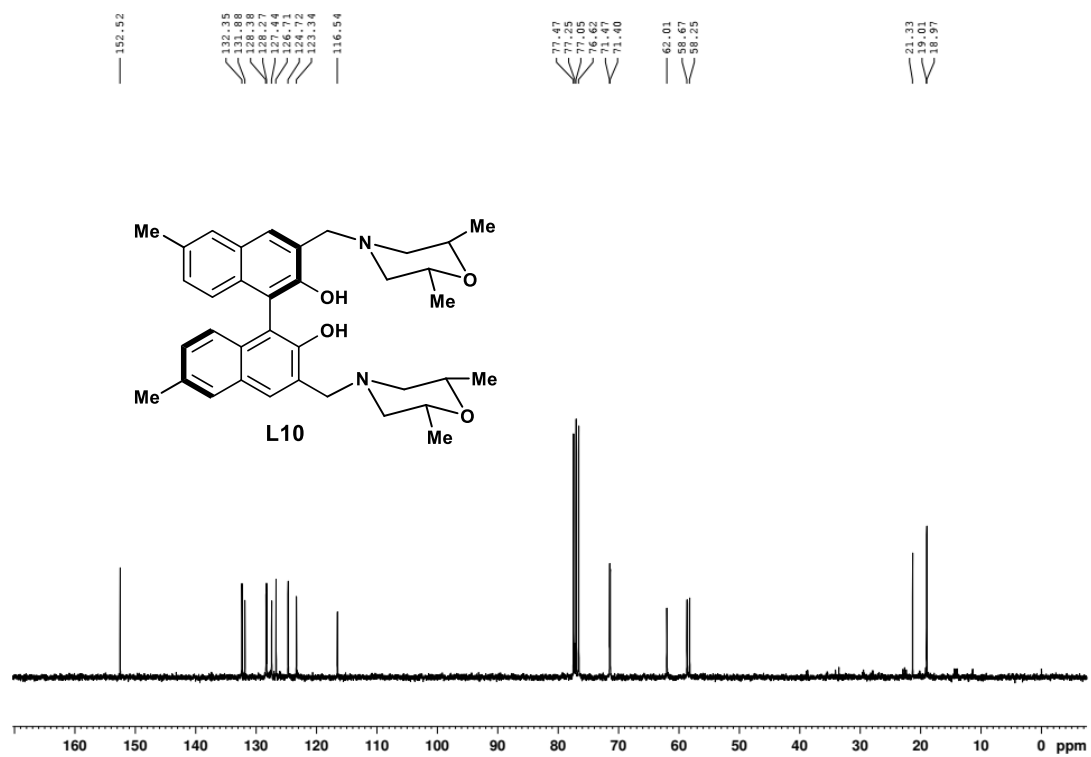

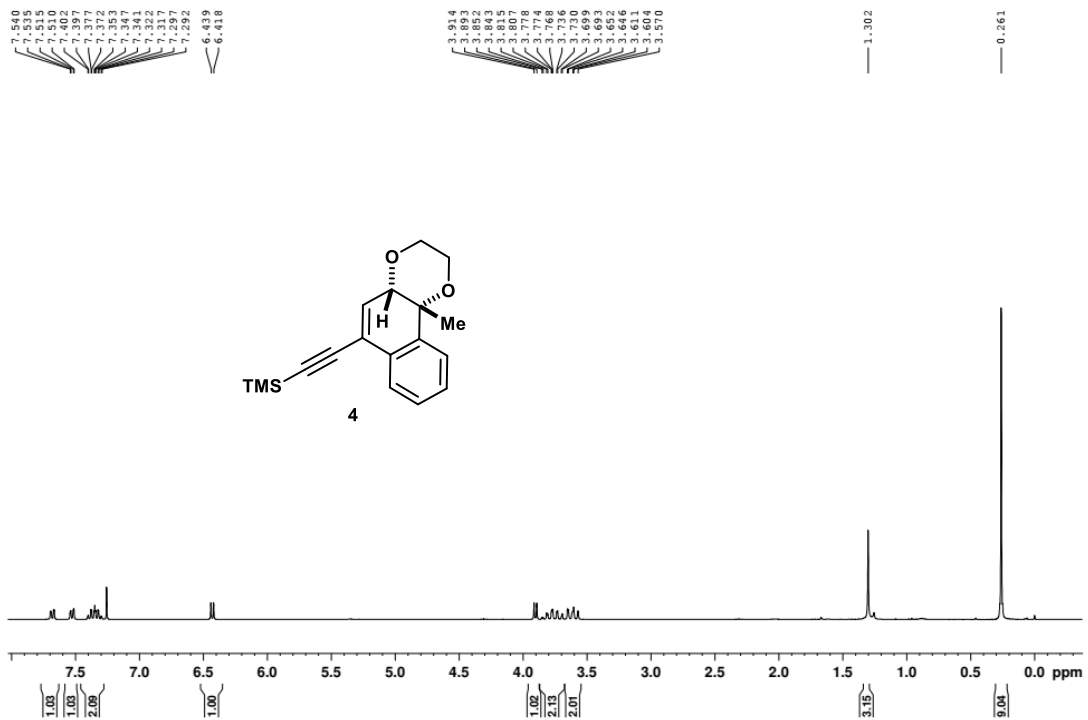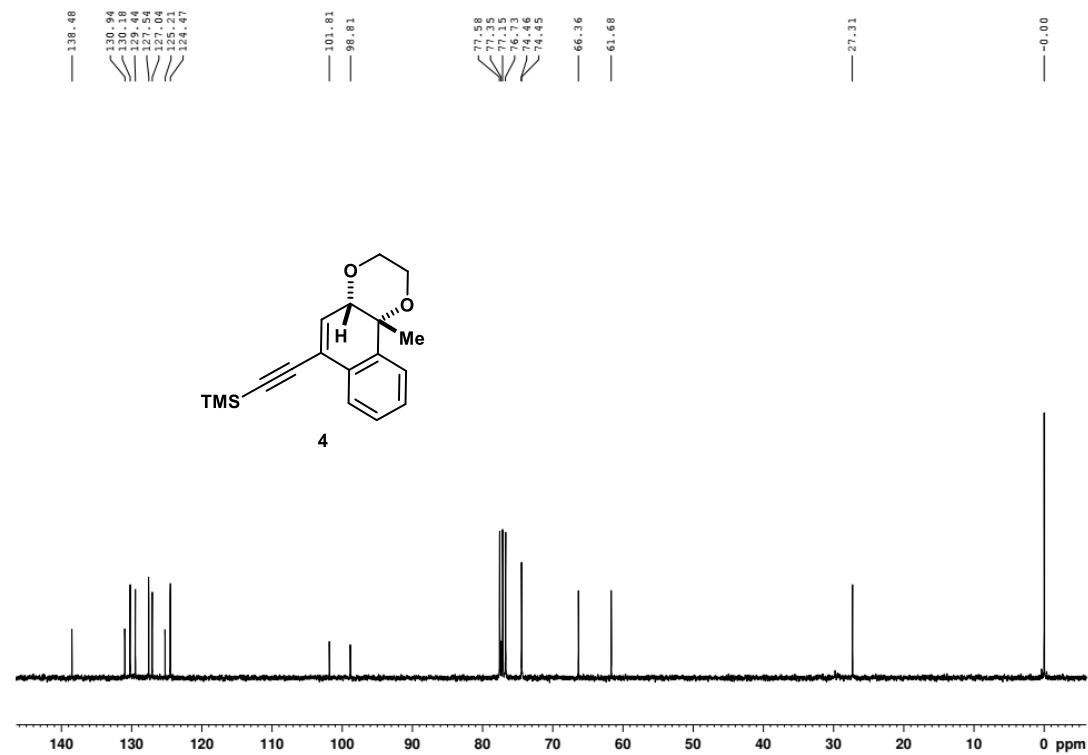

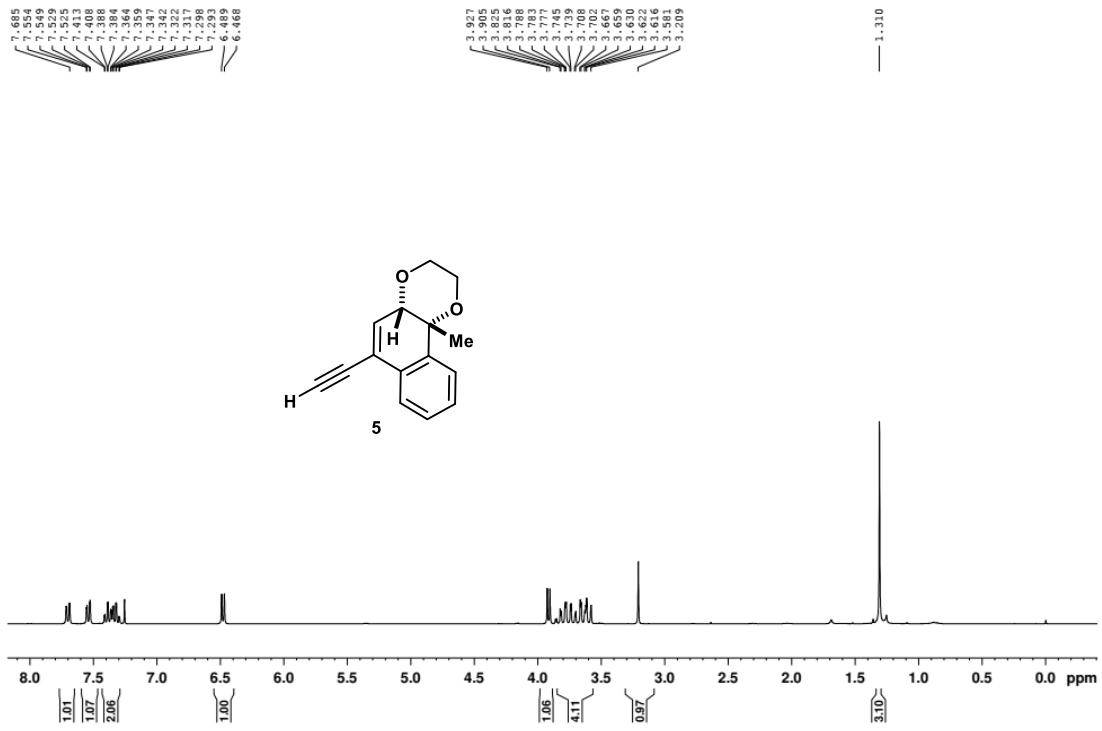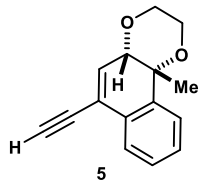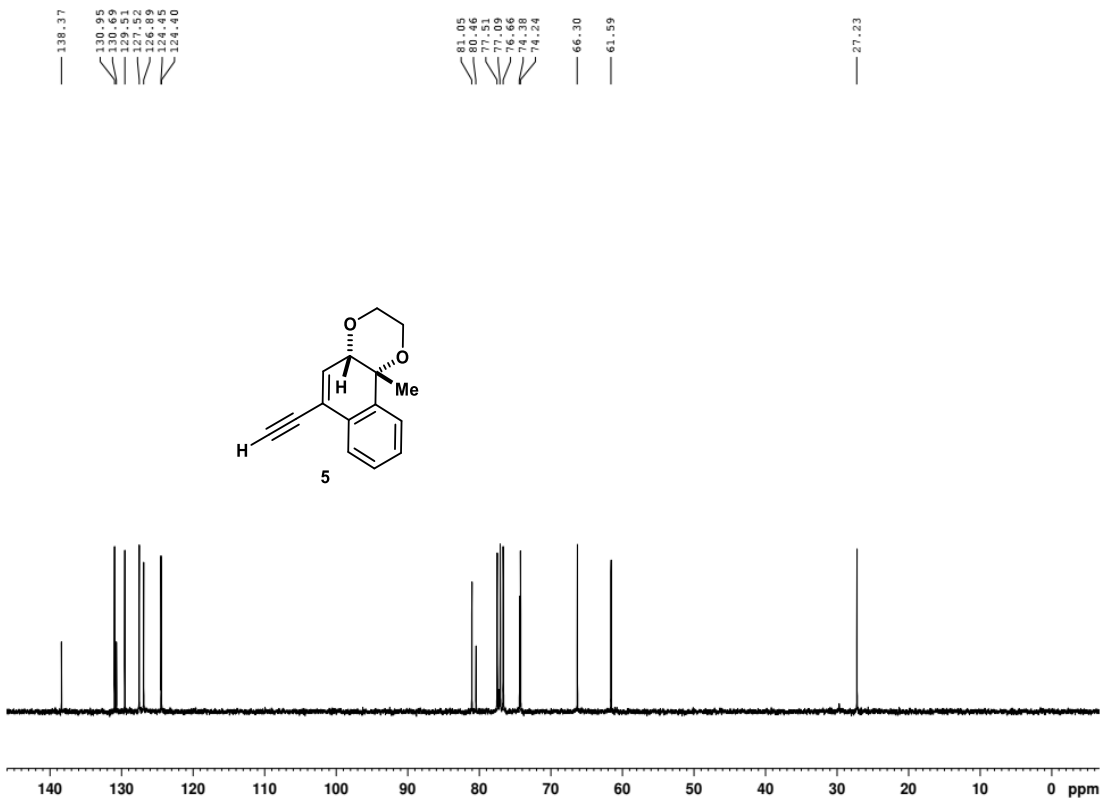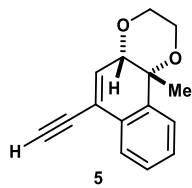



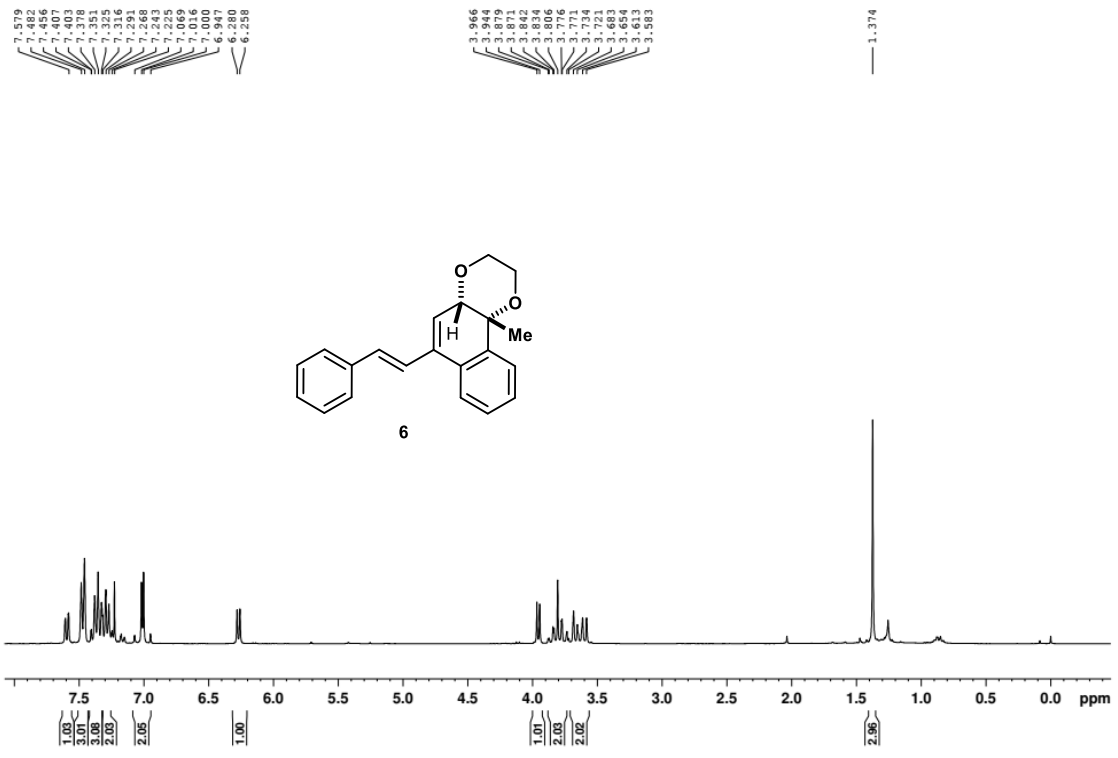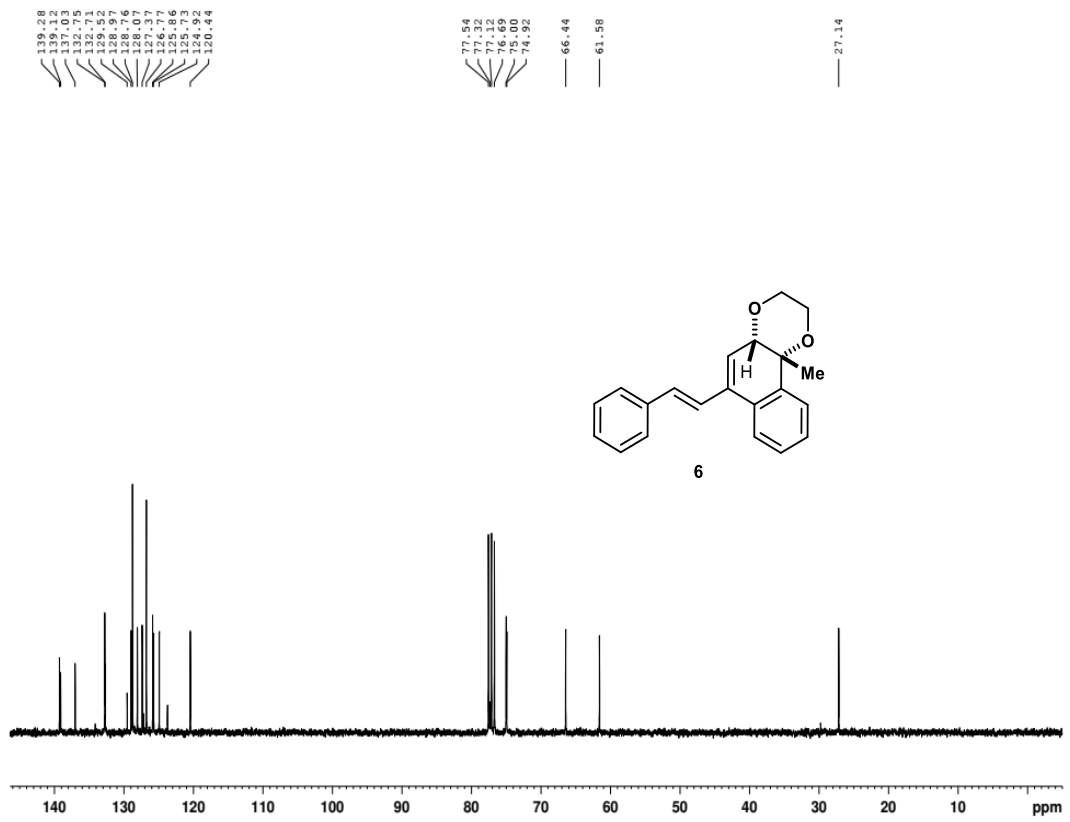

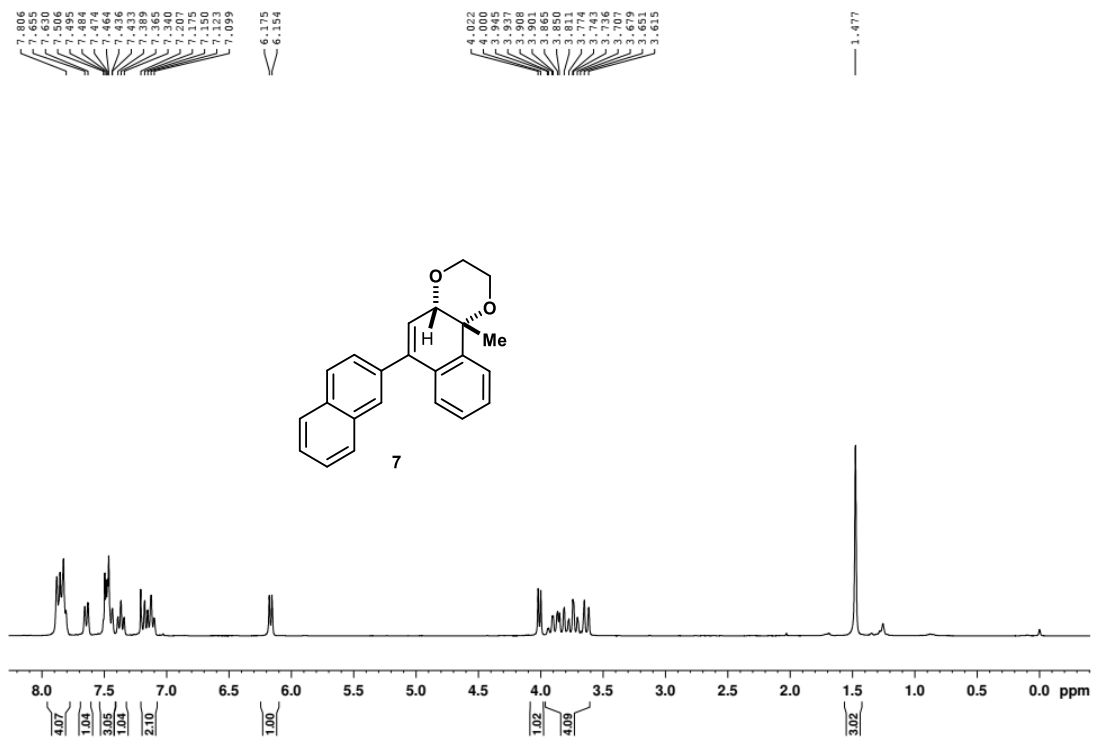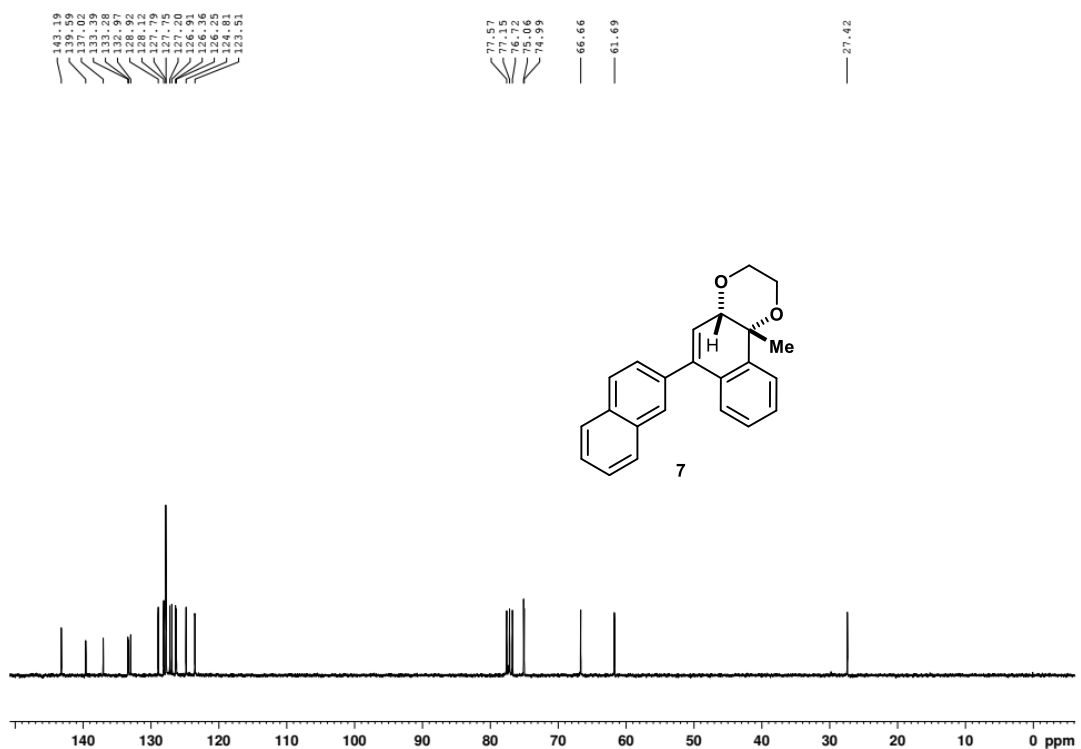

Supplement: d1qo00402f1.pdf [file d1qo00402f1.pdf]
